# Supplementary material for: Regio- and stereoselective synthesis of α-hydroxy-β-azido tetrazoles
Source: Royal Society of Chemistry journal article supplement (doi:10.1039/c4qo00345d), 2015-01-01

## Regio- and Stereoselective Synthesis of $\alpha$ -hydroxy- $\beta$ -azido tetrazoles

Pierre Quinodoz,<sup>a</sup> Cheikh Lo,<sup>a</sup> Mikhail Kletskii,<sup>b</sup> Oleg Burov,<sup>b</sup> Jérôme Marrot<sup>a</sup> and François Couty<sup>a,\*</sup>

*Institut Lavoisier de Versailles, UMR CNRS 8180, Université de Versailles St-Quentin en Yvelines, 45, av. des Etats-Unis, 78035 Versailles Cedex, France.*

*Fax: +33 (0) 1 39 25 44 52. E-mail: [couty@chimie.uvsq.fr](mailto:couty@chimie.uvsq.fr)*

*<sup>b</sup>Department of Chemistry, Southern Federal University, 7, Zorge St., 344090 Rostov-on-Don, Russian Federation.*

### Supplementary material

|                                                                                                                 |    |
|-----------------------------------------------------------------------------------------------------------------|----|
| General Remarks.....                                                                                            | 2  |
| General Procedure for the Synthesis of Cyano Epoxides.....                                                      | 2  |
| General Procedure for the Synthesis of $\alpha$ -Hydroxy- $\beta$ -Azido Tetrazoles.....                        | 10 |
| General Procedure for the reaction of $\alpha$ -Hydroxy- $\beta$ -Azido Tetrazoles with triphenylphosphine..... | 18 |
| Procedure for the hydrogenation of 19.....                                                                      | 20 |
| X-Ray Data for Compound 2.....                                                                                  | 21 |
| <sup>1</sup> H and <sup>13</sup> C NMR Spectra for Representative Compounds.....                                | 25 |

## General Remarks

Column chromatography were performed on a silica gel 230-400 mesh by using various mixtures of dichloromethane (DCM), ethyl acetate (EtOAc), methanol (MeOH), acetic acid (AcOH) and petroleum ether (PE). TLC's were run on Kieselgel 60F<sub>254</sub> plates and revealed by UV light and potassium permanganate (epoxides) or ninhydrin (azido tetrazoles). <sup>1</sup>H and <sup>13</sup>C NMR spectra were collected on a Bruker Avance spectrometer respectively at 200 or 300 MHz and 75 MHz. Data are presented as follows: chemical shift (in ppm on the  $\delta$  scale relative to  $\delta$ TMS = 0), multiplicity (s = singlet, d = doublet, t = triplet, m = multiplet, b = broad), coupling constant (J/Hz), integration and attribution. High resolution mass spectra (HR-MS) were obtained on a Waters Micromass Q-TofMicro instrument. IR spectra were collected on a NICOLET iS 10(SMART iTR diamond ATR) apparatus. Melting points are uncorrected.

## General procedure for the synthesis of cyanoepoxides:

A solution of starting aldehyde or ketone (1 mol equiv.) and chloroacetonitrile (1.2 equiv.) in THF (15 mL/10 mmol) was added dropwise to a suspension of freshly crushed NaOH (3 equiv.) in THF (5 mL/10 mmol of NaOH). The reaction was stirred at room temperature and followed by TLC until full conversion of the aldehyde or ketone. Water (100 mL) and dichloromethane (100 mL) were added to the reaction mixture and the organic layer was washed with brine. The organic layer was concentrated under reduced pressure and the crude residue was purified by flash chromatography on silica gel or alumina (compound **9** and **9'**).

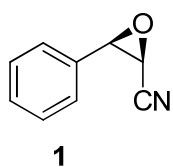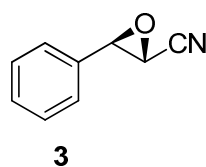

*Cis and Trans 3-phenyloxirane-2-carbonitrile*

Epoxides **1** and **3** were synthesized following general procedure starting from 3 g of benzaldehyde (28.3mmol) and purified by chromatography on silica gel using PE/EtOAc 50:1 as eluant. Pure *trans* and *cis* isomers were isolated as colorless oils crystallising on standing (*trans*: 1.2g, 29% yield, *cis*: 1.3g, 32% yield). (EtOAc/PE : 1/9,  $R_{f_{cis}} = 0.35$ ;  $R_{f_{trans}} = 0.50$ ).

*Trans* stereoisomer:  $^1\text{H NMR}$  (200 MHz,  $\text{CDCl}_3$ )  $\delta$ 7.45-7.40 (m, 3H), 7.35-7.25 (m, 2H), 4.30 (d,  $J=1.8$  Hz, 1H), 3.43 (d,  $J=1.8$  Hz, 1H).  $^{13}\text{C NMR}$  (75 MHz,  $\text{CDCl}_3$ )  $\delta$ 132.75, 129.84, 128.99, 125.66, 116.03, 58.49, 44.64.

*Cis* stereoisomer:  $^1\text{H NMR}$  (200 MHz,  $\text{CDCl}_3$ )  $\delta$ 7.50-7.35 (m, 5H), 4.26 (d,  $J=3.7$  Hz, 1H), 3.79 (d,  $J=3.7$  Hz, 1H).  $^{13}\text{C NMR}$  (75 MHz,  $\text{CDCl}_3$ )  $\delta$ 131.41, 129.73, 128.70, 126.32, 115.07, 57.72, 45.12.

**IR** ( $\text{cm}^{-1}$ )  $\nu_{\text{max}}$ : 3047, 2252, 1454, 1387, 1190, 947, 923, 879, 825, 774, 752, 699, 639, 580, 537, 487. **HRMS** (ESI, TOF MS)  $m/z$  calculated for  $[\text{M}+\text{Na}]^+$ : 168.0426, found: 168.0427.

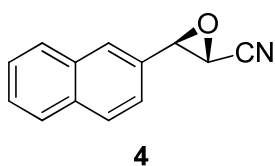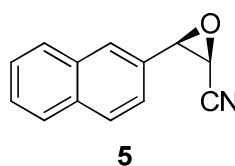

*Cis and Trans 3-(naphthalen-2-yl)oxirane-2-carbonitrile*

Epoxides **4** and **5** were synthesized following general procedure starting from 1.2 g of 2-naphthaldehyde (7.7 mmol) and purified by chromatography on silica gel using PE/EtOAc 98:2 as eluant. Pure *trans* and *cis* isomers were isolated as white solids (*trans*: 485 mg, 32% yield, *cis*: 495 mg, 33% yield). (EtOAc/PE: 1/9,  $R_{f_{cis}} = 0.20$ ;  $R_{f_{trans}} = 0.45$ ).

*Trans* stereoisomer:  $^1\text{H NMR}$  (200 MHz,  $\text{CDCl}_3$ )  $\delta$  7.95-7.80 (m, 4H), 7.60-7.50 (m, 2H), 7.35-7.25 (m, 1H), 4.46 (d,  $J=1.7$  Hz, 1H), 3.52 (d,  $J=1.7$  Hz, 1H).  $^{13}\text{C NMR}$  (75 MHz,  $\text{CDCl}_3$ )  $\delta$  133.87, 132.93, 130.04, 129.09, 127.98, 127.91, 127.08, 126.98, 126.15, 121.84, 116.06, 58.79, 44.71.

*Cis* stereoisomer:  $^1\text{H NMR}$  (200 MHz,  $\text{CDCl}_3$ )  $\delta$  7.80-7.00 (m, 4H), 7.65-7.45 (m, 3H), 4.43 (d,  $J=3.7$  Hz, 1H), 3.87 (d,  $J=3.7$  Hz, 1H).  $^{13}\text{C NMR}$  (75 MHz,  $\text{CDCl}_3$ )  $\delta$  133.89, 132.88, 128.81, 128.70, 128.18, 127.90, 126.93, 126.76, 126.31, 122.99, 115.06, 57.96, 45.28.

$\text{IR}$  ( $\text{cm}^{-1}$ ).  $\nu_{\text{max}}$ : 3049, 2246, 1509, 900, 867, 837, 827, 818, 756, 715, 480, 475.  $\text{HRMS}$  (ESI, TOF MS)  $m/z$  calculated for  $[\text{M}+\text{H}]^+$ : 196.0762, found: 196.0759.

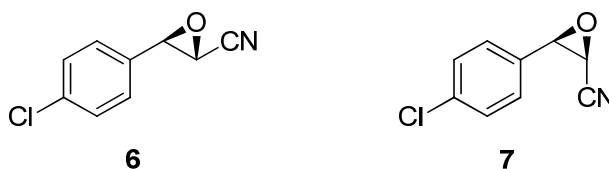

#### *Cis and Trans 3-(4-chlorophenyl)oxirane-2-carbonitrile*

Epoxides **6** and **7** were synthesized following general procedure starting from 1.2 g of *p*-chlorobenzaldehyde (8.5mmol) and purified by chromatography on silica gel using PE/EtOAc 98:2 as eluant. Pure *trans* and *cis* isomers were isolated as white solids (*trans*: 213 mg, 14% yield, *cis*: 430 mg, 28% yield). (EtOAc/PE: 1/9,  $R_{f_{cis}}=0.23$ ;  $R_{f_{trans}}=0.45$ ).

*Trans* stereoisomer:  $^1\text{H NMR}$  (200 MHz,  $\text{CDCl}_3$ )  $\delta$  7.39 (d,  $J=8.5$  Hz, 2H), 7.23 (d,  $J=8.5$  Hz, 2H), 4.29 (d,  $J=1.7$  Hz, 1H), 3.41 (d,  $J=1.7$  Hz, 1H).  $^{13}\text{C NMR}$  (75 MHz,  $\text{CDCl}_3$ )  $\delta$  135.85, 131.26, 129.28, 127.01, 115.73, 57.89, 44.66.

*Cis* stereoisomer:  $^1\text{H NMR}$  (200 MHz,  $\text{CDCl}_3$ )  $\delta$  7.43 (d,  $J=8.6$  Hz, 2H) 7.37 (d,  $J=8.6$  Hz, 2H), 4.25 (d,  $J=3.7$  Hz, 1H), 3.80 (d,  $J=3.7$  Hz, 1H).  $^{13}\text{C NMR}$  (75 MHz,  $\text{CDCl}_3$ )  $\delta$  135.74, 129.96, 129.02, 127.71, 114.84, 57.14, 45.11.

$\text{IR}$  ( $\text{cm}^{-1}$ )  $\nu_{\text{max}}$ : 3047, 2246, 1495, 1090, 839, 827, 767, 510.  $\text{HRMS}$  (ESI, TOF MS): not detected.

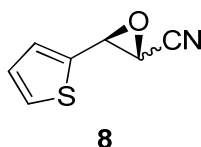

### *3-Thiophen-2-yl-oxirane-2-carbonitrile*

Epoxide **8** was synthesized following general procedure starting from 5g of 2-thiophenecarboxaldehyde (44 mmol) and was isolated without purification as a brown liquid (6 g, 89% yield), 1:2 mixture of *cis/trans* stereoisomers. (EtOAc/PE: 1/9,  $R_{f_{trans}} = 0.62$ ,  $R_{f_{cis}} = 0.35$ ).

$^1\text{H NMR}$  (200 MHz,  $\text{CDCl}_3$ )  $\delta$  7.40 (dd,  $J = 5.0, 1.2$  Hz,  $1\text{H}_{cis}$ ), 7.36 (dd,  $J = 5.0, 0.9$  Hz,  $1\text{H}_{trans}$ ), 7.29 (dd,  $J = 2.4, 1.9$  Hz,  $1\text{H}_{cis}$ ), 7.22 (dd,  $J = 3.6, 0.8$  Hz,  $1\text{H}_{trans}$ ), 7.08 (dd,  $J = 5.4, 4.0$  Hz,  $1\text{H}_{cis}$ ), 7.04 (dd,  $J = 5.0, 3.6$  Hz,  $1\text{H}_{trans}$ ), 4.54 (d,  $J = 1.8$  Hz,  $1\text{H}_{trans}$ ), 4.45 (d,  $J = 3.5$  Hz,  $1\text{H}_{cis}$ ), 3.82 (d,  $J = 3.5$  Hz,  $1\text{H}_{cis}$ ), 3.61 (d,  $J = 1.8$  Hz,  $1\text{H}_{trans}$ ).  $^{13}\text{C NMR}$  (75 MHz,  $\text{CDCl}_3$ )  $\delta$  135.86 (*trans*), 134.20 (*cis*), 128.26 (*trans*), 127.75 (*cis*), 127.61 (*trans*), 127.45 (*cis*), 127.10 (*cis*), 127.03 (*trans*), 115.63 (*trans*), 115.12 (*cis*), 55.59 (*trans*), 54.89 (*cis*), 45.82 (*cis*), 45.43 (*trans*). **IR** ( $\text{cm}^{-1}$ )  $\nu_{\text{max}}$ : 3110, 3029, 2247, 1444, 1404, 1308, 1246, 1225, 883, 714. **HRMS** (ESI, TOF MS)  $m/z$  calculated for  $[\text{M}+\text{H}]^+$ : 152.0170, found: 152.0172.

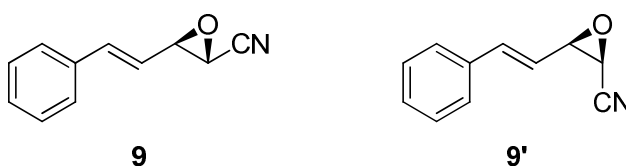

### *(E)-3-Styryl-oxirane-2-carbonitrile*

Epoxides **9** and **9'** were synthesized following general procedure starting from 4 g of cinnamaldehyde and a mixture of *cis/trans* stereoisomers 1:1.8 was isolated as a colorless oil after rapid purification on alumina (1.6 g, 31% yield). (EtOAc/PE: 1 / 9,  $R_{f_{trans}} = 0.51$ ,  $R_{f_{cis}} = 0.47$ ). Additional analytical samples of pure isomers were obtained in low yield during this

purification (this compound is not stable upon attempted purification on silica gel chromatography).

*Trans* stereoisomer:  $^1\text{H NMR}$  (300 MHz,  $\text{CDCl}_3$ )  $\delta$  7.26 (m, 5H), 6.81 (d,  $J = 16.0$  Hz, 1H), 5.67 (dd,  $J = 16.0, 7.8$  Hz, 1H), 3.83 (dd,  $J = 7.8, 1.7$  Hz, 1H), 3.32 (d,  $J = 1.8$  Hz, 1H).  $^{13}\text{C NMR}$  (75 MHz,  $\text{CDCl}_3$ )  $\delta$  138.21, 134.98, 129.13, 128.89, 126.84, 121.49, 116.20, 58.94, 43.31.

*Cis* stereoisomer:  $^1\text{H NMR}$  (300 MHz,  $\text{CDCl}_3$ )  $\delta$  7.33 (m, 5H), 6.92 (d,  $J = 15.9$  Hz, 1H), 5.98 (dd,  $J = 15.9, 8.1$  Hz, 1H), 3.76 (dd,  $J = 8.1, 3.7$  Hz, 1H), 3.65 (d,  $J = 3.7$  Hz, 1H).  $^{13}\text{C NMR}$  (75 MHz,  $\text{CDCl}_3$ )  $\delta$  139.42, 135.04, 129.12, 128.82, 126.97, 120.30, 115.54, 57.54, 43.64.

$\text{IR}$  ( $\text{cm}^{-1}$ )  $\nu_{\text{max}}$ : 2245, 1490, 1451, 1412, 1226, 974, 891, 773, 695.  $\text{HRMS}$  (ESI, TOF MS)  $m/z$  calculated for  $[\text{M}+\text{H}]^+$ : 172.0762, found: 172.0763.

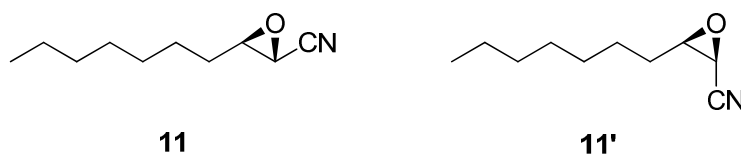

### *3-Heptyl-oxirane-2-carbonitrile*

To a solution of octanal (2g, 12 mmol), chloroacetonitrile (1.3 g, 17 mmol) and a catalytic amount (50 mg) of dodecyltrimethylammonium chloride (DTA-Cl) in acetonitrile (30 mL) was added under stirring a solution of 50% aqueous NaOH (30 mL). After 20 minutes, full conversion of the aldehyde was evidenced by TLC and the reaction mixture was diluted with water (50 mL) and DCM (50 mL). The aqueous layer was extracted with dichloromethane and washed with brine, concentrated under reduced pressure and purified on a short plug of silica gel using PE/EtOAc 9:1 as eluant. A 1:1 mixture of **9** and **9'** was isolated as a colorless liquid (1.5 g, 59% yield). (EtOAc/PE: 1/9,  $R_{f_{\text{trans}}} = 0.67$ ,  $R_{f_{\text{cis}}} = 0.65$ ). Further purification by silica gel chromatography using PE/Et<sub>2</sub>O 9:1 allowed to isolate pure *trans* and *cis* isomers.

*Trans* stereoisomer:  $^1\text{H NMR}$  (300 MHz,  $\text{CDCl}_3$ )  $\delta$  3.34 (td,  $J = 6.0, 1.9$  Hz, 1H), 3.17 (d,  $J = 1.9$  Hz, 1H), 1.71–1.20 (m, 12H), 0.89 (t,  $J = 6.5$  Hz, 3H).  $^{13}\text{C NMR}$  (75 MHz,  $\text{CDCl}_3$ )  $\delta$  116.80, 59.17, 40.95, 31.63, 31.01, 29.08, 29.02, 25.26, 22.57, 14.04.

*Cis* stereoisomer:  $^1\text{H NMR}$  (300 MHz,  $\text{CDCl}_3$ )  $\delta$  3.46 (d,  $J = 3.8$  Hz, 1H), 3.19 (td,  $J = 6.0, 3.7$  Hz, 1H), 1.88 – 1.17 (m, 12H), 0.90 (t,  $J = 6.6$  Hz, 3H).  $^{13}\text{C NMR}$  (75 MHz,  $\text{CDCl}_3$ )  $\delta$  115.94, 57.44, 41.74, 31.66, 29.75, 29.15, 29.06, 25.72, 22.59, 14.07.

**HRMS** (ESI, TOF MS)  $m/z$  calculated for  $[\text{M}+\text{H}]^+$ : 168.1388, found: 168.1387.

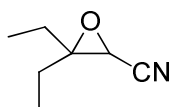

**12**

### *3,3-Diethyl-oxirane-2-carbonitrile*

Epoxide **12** was synthesized following general procedure starting from 3 g of 3-pentanone (34.8 mmol) and was isolated as a colorless oil (2.4 g, 55% yield). (EtOAc/PE: 1/9,  $R_f = 0.75$ ).

$^1\text{H NMR}$  (300 MHz,  $\text{CDCl}_3$ )  $\delta$  3.27 (s, 1H), 1.96–1.62 (m, 4H), 1.09 (td,  $J = 7.5, 1.3$  Hz, 3H), 0.92 (td,  $J = 7.5, 1.3$  Hz, 3H).  $^{13}\text{C NMR}$  (75 MHz,  $\text{CDCl}_3$ )  $\delta$  116.48, 67.34, 46.21, 25.44, 25.12, 9.07, 8.31. **IR** ( $\text{cm}^{-1}$ )  $\nu_{\text{max}}$ : 2976, 2944, 2884, 2244, 1462, 1411, 938, 909, 820. **HRMS** (ESI, TOF MS)  $m/z$  calculated for  $[\text{M}+\text{H}]^+$ : 126.0919, found: 126.0917.

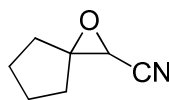

**13**

### *1-Oxa-spiro[2.4]heptane-2-carbonitrile*

Epoxide **13** was synthesized following general procedure starting from 2 g of cyclopentanone (24 mmol) and was isolated as a colorless oil (2.4 g, 82% yield). (EtOAc/PE: 1/9,  $R_f = 0.57$ ).

$^1\text{H NMR}$  (300 MHz,  $\text{CDCl}_3$ )  $\delta$  3.46 (s, 1H), 2.17–1.60 (m, 8H).  $^{13}\text{C NMR}$  (75 MHz,  $\text{CDCl}_3$ )  $\delta$  116.59, 71.43, 45.78, 31.84, 30.62, 25.33, 24.92. **IR** ( $\text{cm}^{-1}$ )  $\nu_{\text{max}}$ : 2967, 2875, 2244, 1453,

1436, 1413, 941. **HRMS** (ESI, TOF MS)  $m/z$  calculated for  $[M+H]^+$ : 124.0762, found: 124.0766.

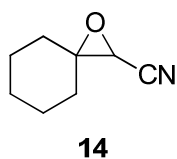

*1-Oxa-spiro[2.5]octane-2-carbonitrile*

Epoxide **14** was synthesized following general procedure starting from 2 g of cyclohexanone (20 mmol) and was isolated as a colorless oil (2.4 g, 86% yield). (EtOAc/PE: 1/9,  $R_f$  = 0.64).

$^1\text{H NMR}$  (300 MHz,  $\text{CDCl}_3$ )  $\delta$  3.24 (s, 1H), 1.83-1.49 (m, 10H).  $^{13}\text{C NMR}$  (75 MHz,  $\text{CDCl}_3$ )  $\delta$  116.27, 65.46, 47.39, 33.17, 31.07, 24.75, 24.58. **IR** ( $\text{cm}^{-1}$ )  $\nu_{\text{max}}$ : 2968, 2244, 1413, 942.

**HRMS** (ESI, TOF MS)  $m/z$  calculated for  $[M+H]^+$ : 138.0919, found: 138.0913

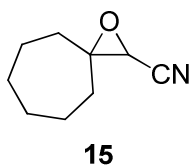

*1-Oxa-spiro[2.6]nonane-2-carbonitrile*

Epoxide **15** was synthesized following general procedure starting from 2 g of cycloheptanone (18 mmol) and was isolated as a colorless liquid (2.3 g, 85% yield). (EtOAc/PE: 1/9,  $R_f$  = 0.60).

$^1\text{H NMR}$  (300 MHz,  $\text{CDCl}_3$ )  $\delta$  3.25 (s, 1H), 2.12-1.44 (m, 12H).  $^{13}\text{C NMR}$  (75 MHz,  $\text{CDCl}_3$ )  $\delta$  116.46, 66.79, 48.58, 35.46, 33.17, 28.84, 28.68, 24.33, 23.99. **IR** ( $\text{cm}^{-1}$ )  $\nu_{\text{max}}$ : 2930, 2859, 2244, 1468, 1448, 943. **HRMS** (ESI, TOF MS)  $m/z$  calculated for  $[M+H]^+$ : 152.1075, found: 152.1071.

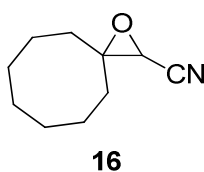

*1-Oxa-spiro[2.7]decane-2-carbonitrile*



Epoxide **16** was synthesized following general procedure starting from 2 g of cyclooctanone (16mmol) and was isolated as a yellow liquid (1.3 g, 48% yield). (EtOAc/PE: 1/9, R<sub>f</sub> = 0.60). <sup>1</sup>H NMR (300 MHz, CDCl<sub>3</sub>) δ 3.28 (s, 1H), 2.01–1.46 (m, 14H). <sup>13</sup>C NMR (75 MHz, CDCl<sub>3</sub>) δ 116.50, 66.29, 49.11, 33.76, 31.74, 26.45, 25.89, 24.96, 24.35, 22.69. IR (cm<sup>-1</sup>) ν<sub>max</sub>: 2933, 2859, 2243, 1456, 1252, 967, 939. HRMS (ESI, TOF MS) m/z calculated for [M+H]<sup>+</sup>: 166.1232, found: 166.1233.

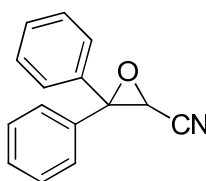

**17**

### *3,3-Diphenyl-oxirane-2-carbonitrile*

Epoxide **17** was synthesized following general procedure starting from 3 g of benzophenone and was isolated as a white solid (3.2 g, 88% yield). (EtOAc/PE: 1/9, R<sub>f</sub> = 0.40).

**Mp**: 75°C. <sup>1</sup>H NMR (300 MHz, CDCl<sub>3</sub>) δ 7.41–7.21 (m, 10H), 3.83 (s, 1H). <sup>13</sup>C NMR (75 MHz, CDCl<sub>3</sub>) δ 136.44, 134.48, 129.34, 129.32, 128.81, 128.65, 127.72, 127.34, 115.27, 67.68, 50.11. IR (cm<sup>-1</sup>) ν<sub>max</sub>: 3061, 3026, 2248, 1495, 1445, 1297, 1268, 935, 916, 901, 766, 755, 703, 693, 651, 599. HRMS (ESI, TOF MS) m/z calculated for [M+H]<sup>+</sup>: 222.0919, found: 222.0919.

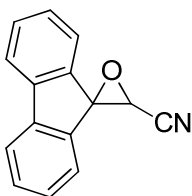

**18**

### *3,3-Fluoren-9-yl-oxirane-2-carbonitrile*

Epoxide **18** was synthesized following general procedure starting from 3 g of fluorenone and was isolated as a white solid (1.53 g, 42% yield). (EtOAc/PE : 1/9, R<sub>f</sub> = 0.45).

**Mp:**122°C. <sup>1</sup>H NMR (300 MHz, CDCl<sub>3</sub>) δ 7.65–7.02 (m, 8H), 4.12 (s, 1H). <sup>13</sup>C NMR (75 MHz, CDCl<sub>3</sub>) δ 141.57, 141.35, 137.30, 135.48, 130.86, 130.78, 128.15, 127.99, 123.78, 121.55, 120.82, 120.78, 115.17, 67.20, 48.31. **IR** (cm<sup>-1</sup>) ν<sub>max</sub>: 3070, 2247, 1615, 1491, 1398, 1325, 1295, 916, 759, 747, 725. **HRMS** (ESI, TOF MS) m/z calculated for [M+H]<sup>+</sup>: 220.0762, found: 220.0759.

### General procedure for the synthesis of α-hydroxy-β-azido tetrazoles:

A solution of cyanoepoxide (1 equiv.), Bu<sub>2</sub>SnO (0.5 equiv.) and TMSN<sub>3</sub> (3 equiv.) in toluene (10 mL/mmol of epoxide) was stirred at 60°C for 18 h. The solvent was removed under reduced pressure and a 1:1 THF/2N aqueous HCl mixture (20 mL) was added to the crude and stirred for 30 min. Water and EtOAc were added and the aqueous layer was extracted (EtOAc), washed with brine and dried over MgSO<sub>4</sub>. Evaporation gave a residue that was washed by trituration with small portions of dichloromethane. Further purification could be done by flash chromatography over silica gel using dichloromethane/ MeOH / Acetic acid : 9 / 0.5 / 0.5 mixture as eluent (spots were revealed with ninhydrin).

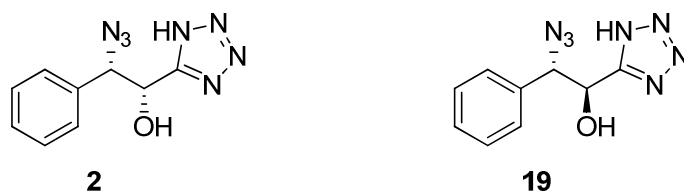

### *Syn and Anti-2-azido-2-phenyl-1-(1H-tetrazol-5-yl)ethanol*

Tetrazoles **2** and **19** were synthesized following general procedure starting from **183** and **148** mg of cyanoepoxide **1** and **3** respectively. Products were isolated as white solids. (**2**: 190 mg, 65% yield; **19**: 200 mg, 85% yield). (Dichloromethane/ MeOH / Acetic acid : 9/0.5/0.5, R<sub>f</sub> = 0.38). **Mp:** **2**:176°C, **19**: 175°C.

*Anti* stereoisomer:  $^1\text{H NMR}$  (300 MHz, DMSO)  $\delta$ 7,40-7,20 (m, 5H), 6,76 (dl,  $J=4,9$  Hz, 1H), 5,33 (t,  $J=5,3$  Hz, 1H), 5,16 (d,  $J=6,0$  Hz, 1H).  $^{13}\text{C NMR}$  (75 MHz, DMSO)  $\delta$ 156,76, 135,34, 128,31, 127,85, 67,58, 67,39.

*Syn*-stereoisomer:  $^1\text{H NMR}$  (300 MHz, DMSO)  $\delta$ 7,35-7,20 (m, 5H), 6,88 (dl,  $J=5,8$  Hz, 1H), 5,28 (t,  $J=5,6$  Hz, 1H), 5,07 (d, 1H,  $J=6,1$  Hz).  $^{13}\text{C NMR}$  (75 MHz, DMSO)  $\delta$ 135,71, 128,49, 127,89, 68,13, 68,05.

**IR** ( $\text{cm}^{-1}$ )  $\nu_{\text{max}}$ : 3370, 2628, 2113, 1076, 753, 696, 594, 554. **HRMS** (ESI, TOF MS)  $m/z$  calculated for  $[\text{M}+\text{H}]^+$ : 232,0947, found: 232,0950.

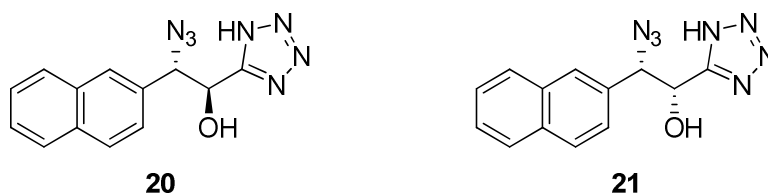

*Syn and Anti 2-azido-2-(naphthalen-2-yl)-1-(1H-tetrazol-5-yl)ethanol*

Tetrazoles **20** and **21** were synthesized following general procedure starting from 150 mg of cyanoepoxide **4** and **5** respectively. Products were isolated as white solids. (**20**: 216mg, 55% yield, **21**: 121mg, 56% yield). (Dichloromethane/ MeOH / Acetic acid : 9/0.5/0.5,  $R_f$  = 0.35). **Mp**: **20**: 211°C (dec.), **21**: 209°C (dec.).

*Anti* stereoisomer:  $^1\text{H NMR}$  (300 MHz, DMSO)  $\delta$ 8,00-7,85 (m, 3H), 7,82 (s, 1H), 7,60-7,45 (m, 2H), 7,42 (d, 1H,  $J=8,6$  Hz), 6,83 (dl,  $J=4,7$  Hz, 1H), 5,45 (t,  $J=5,0$  Hz, 1H), 5,36 (d,  $J=5,9$  Hz, 1H).  $^{13}\text{C NMR}$  (75 MHz, DMSO)  $\delta$ 132,95, 132,66, 132,44, 127,92, 127,50, 127,17, 126,42, 126,36, 125,31, 67,78, 67,47.

*Syn*-stereoisomer:  $^1\text{H NMR}$  (300 MHz, DMSO)  $\delta$ 7,90-7,80 (m, 4H), 7,60-7,40 (m, 4H), 5,41 (d,  $J=6,4$  Hz, 1H), 5,36 (d,  $J=6,4$  Hz, 1H).  $^{13}\text{C NMR}$  (75 MHz, DMSO)  $\delta$ 133,26,64, 132,44, 128,02, 127,91, 127,51, 127,05, 126,46, 126,39, 125,35, 68,35, 68,11.

**IR** ( $\text{cm}^{-1}$ )  $\nu_{\text{max}}$ : 3338, 2357, 2105, 1245, 1078, 817, 746, 555, 477. **HRMS** (ESI, TOF MS)  $m/z$  calculated for  $[\text{M}+\text{H}]^+$ : 282.1103, found: 282.1101

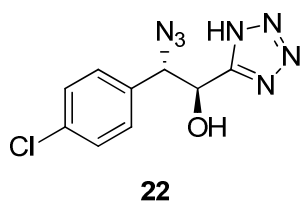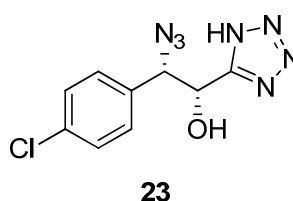

*Syn and Anti-2-azido-2-(4-chlorophenyl)-1-(1H-tetrazol-5-yl)ethanol*

Tetrazoles **22** and **23** were synthesized following general procedure starting from 160 mg of cyanoepoxide **6** and **7** respectively. Products were isolated as white solids. (**22**: 150mg, 63% yield, **23**: 121mg, 51% yield). (Dichloromethane/ MeOH / Acetic acid: 9/0.5/0.5, Rf = 0.33). Mp: **22**: 198°C (dec.) **23**: 203°C (dec.).

*Anti* stereoisomer: <sup>1</sup>H NMR (300 MHz, DMSO) δ 7,40 (d, J=8,5 Hz, 2H), 7,28 (d, J=8,5 Hz, 2H), 6,82 (dl, J=3,2 Hz, 1H), 5,34 (t, J=4,9 Hz, 1H), 5,22 (d, J=5,7 Hz, 1H). <sup>13</sup>C NMR (75 MHz, DMSO) δ 134,36, 132,93, 129,72, 128,27, 67,43, 66,75.

*Syn*-stereoisomer: <sup>1</sup>H NMR (300 MHz, DMSO) δ 7,42 (d, J=8,6 Hz, 2H), 7,34 (d, J=8,6 Hz, 2H), 6,91 (dl, J=5,5 Hz, 1H), 5,29 (t, J=5,3 Hz, 1H), 5,14 (d, J=6,0 Hz, 1H). <sup>13</sup>C NMR (75 MHz, DMSO) δ 134,73, 133,03, 129,74, 128,39, 67,93, 67,18.

IR (cm<sup>-1</sup>) ν<sub>max</sub>: 3373, 2116, 1492, 1244, 1073, 875, 824, 797, 600, 522, 480. HRMS (ESI, TOF MS) m/z calculated for [M+H]<sup>+</sup>: 266.0560, found: 266.0557.

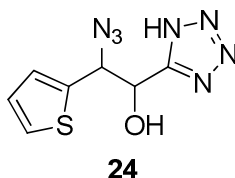

*Syn and anti-2-azido-1-(1H-tetrazol-5-yl)-2-thiophen-2-yl-ethanol*

Tetrazole **24** was synthesized following general procedure starting from 1g of cyanoepoxide **8** (1:2 mixture of *cis* / *trans* stereoisomers). Product was purified by flash chromatography using dichloromethane/ MeOH / acetic acid :15 / 0.5 / 0.5 mixture as eluant and was isolated as

brown solid (590 mg, 38% yield, 1:1.3 mixture of two stereoisomers). (Dichloromethane/MeOH / acetic acid : 9 / 0.5 / 0.5, R<sub>f</sub> = 0.36). **Mp**: 125°C. **<sup>1</sup>H NMR** (300 MHz, DMSO) δ 7.57 (d, *J* = 5.1 Hz, 1H<sub>min</sub>), 7.51 (d, *J* = 5.1 Hz, 1H<sub>maj</sub>), 7.19 (d, *J* = 2.8 Hz, 1H<sub>min</sub>), 7.12 (d, *J* = 2.8 Hz, 1H<sub>maj</sub>), 7.07 (s, 1H), 7.03 (dd, *J* = 5.1, 3.6 Hz, 1H<sub>min</sub>), 6.99 (dd, *J* = 5.0, 3.6 Hz, 1H<sub>maj</sub>), 5.45 (d, *J* = 4.8 Hz, 1H<sub>maj</sub>), 5.36 (d, *J* = 4.5 Hz, 1H<sub>maj</sub> + 1H<sub>min</sub>), 5.32 (d, *J* = 4.3 Hz, 1H<sub>min</sub>). **<sup>13</sup>C NMR** (75 MHz, DMSO) δ 156.94 (*maj*), 156.21 (*min*), 137.18 (*min*), 136.35 (*maj*), 128.00 (*maj*), 127.84 (*min*), 127.34 (*min*), 127.23 (*maj*), 126.51 (*min*), 67.93 (*min*), 67.54 (*maj*), 63.35 (*min*), 63.32 (*maj*). **IR** (cm<sup>-1</sup>) ν<sub>max</sub>: 3370, 3105, 2719, 2114, 1317, 1282, 1226, 1077, 714. **HRMS** (ESI, TOF MS) *m/z* calculated for [M+H]<sup>+</sup>: 238.0511, found: 238.0514.

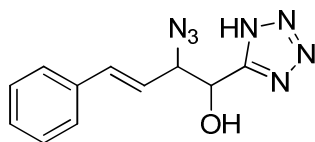

**25**

*Syn and anti-(E)-2-azido-4-phenyl-1-(1H-tetrazol-5-yl)-but-3-en-1-ol*

Tetrazole**25** was synthesized following general procedure starting from 500 mg of stereoisomerically pure *trans*-cyanoepoxide**9** and was isolated as a white solid (390 mg, 52% yield). Mixture of two stereoisomers (2:1 ratio). (Dichloromethane/MeOH/Acetic acid: 9/0.5/0.5, R<sub>f</sub> = 0.31). **Mp**: 134°C. **<sup>1</sup>H NMR** (300 MHz, DMSO) δ 7.52-7.23 (m, 5H), 6.85 (s, 1H), 6.81 (d, *J* = 16.0 Hz, 1H<sub>min</sub>), 6.69 (d, *J* = 15.9 Hz, 1H<sub>maj</sub>), 6.38 (dd, *J* = 15.9, 8.0 Hz, 1H<sub>min</sub>), 6.31 (dd, *J* = 15.9, 8.0 Hz, 1H<sub>maj</sub>), 5.25 (bm, 1H<sub>min</sub>), 5.24 (bm, 1H<sub>maj</sub>), 4.66 (dd, *J* = 7.5, 4.5 Hz, 1H<sub>maj</sub>), 4.58 (dd, *J* = 7.8, 4.4 Hz, 1H<sub>min</sub>). **<sup>13</sup>C NMR** (75 MHz, DMSO) δ 156.33, 135.55 (*min*), 135.52 (*maj*), 135.07 (*maj*), 134.89 (*min*), 128.69 (*maj*), 128.29 (*min*), 126.63 (*min*), 126.58 (*maj*), 122.79 (*min*), 122.27 (*maj*), 67.34 (*min*), 67.08 (*maj*), 66.68 (*maj*), 66.51 (*min*). **IR** (cm<sup>-1</sup>) ν<sub>max</sub>: 3356, 3025, 2718, 2106, 1576, 1448, 1246, 1114, 965, 752, 691. **HRMS** (ESI, TOF MS) *m/z* calculated for [M+H]<sup>+</sup>: 258.1103, found: 258.1102.

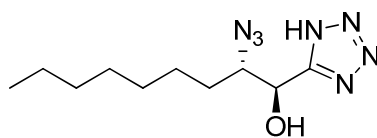

**26**

*Anti-2-azido-1-(1H-tetrazol-5-yl)-nonan-1-ol*

Tetrazole**26** was synthesized following general procedure starting from 410 mg of *trans*-cyanoepoxide**11**. Instead of precipitation, crude product was purified by flash chromatography using dichloromethane/ MeOH / Acetic acid: 9 / 0.5 / 0.5 mixture as eluant. Product was isolated as white solid (440 mg, 70% yield). (Dichloromethane/ MeOH / Acetic acid: 9/0.5/0.5, R<sub>f</sub> = 0.37). **Mp**: 146°C. **<sup>1</sup>H NMR** (300 MHz, DMSO) δ 6.69 (s, 1H), 5.15 (d, *J* = 3.9 Hz, 1H), 3.85–3.75 (m, 1H), 1.60–1.10 (m, 12H), 0.89–0.79 (m, 3H). **<sup>13</sup>C NMR** (75 MHz, DMSO) δ 156.27, 67.31, 65.57, 31.10, 29.01, 28.56, 28.45, 25.51, 22.02, 13.88. **IR** (cm<sup>-1</sup>) ν<sub>max</sub>: 3377, 2933, 2858, 2661, 2101, 1571, 1463, 1439, 1250, 1113, 1093, 1064, 940. **HRMS** (ESI, TOF MS) *m/z* calculated for [M+H]<sup>+</sup>: 254.1729, found: 254.1732.

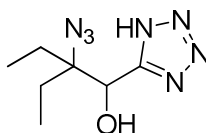

**27**

*2-Azido-2-ethyl-1-(1H-tetrazol-5-yl)-butan-1-ol*

Tetrazole**27** was synthesized following general procedure starting from 1g of cyanoepoxide**12** and was isolated as a white solid (1 g, 60% yield). (Dichloromethane/MeOH/Acetic acid: 9/0.5/0.5, R<sub>f</sub> = 0.36). **Mp**: 128°C. **<sup>1</sup>H NMR** (300 MHz, DMSO) δ 6.74 (d, *J* = 4.3 Hz, 1H), 5.10 (d, *J* = 4.2 Hz, 1H), 1.95-1.75 (m, 2H), 1.45-1.25 (m, 2H), 0.94 (t, *J* = 7.3 Hz, 3H), 0.80 (t, *J* = 7.3 Hz, 3H). **<sup>13</sup>C NMR** (75 MHz, DMSO) δ 156.27, 68.60, 24.24, 23.04, 7.55, 7.36. **IR** (cm<sup>-1</sup>) ν<sub>max</sub>: 3393, 2978, 2948, 2596, 2112, 1455, 1262, 1117, 1081, 1058, 921. **HRMS** (ESI, TOF MS) *m/z* calculated for [M+H]<sup>+</sup>: 212.1260, found: 212.1262.

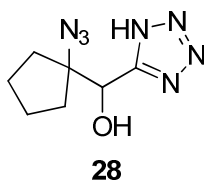

*(1-Azido-cyclopentyl)-(1H-tetrazol-5-yl)-methanol*

Tetrazole**28** was synthesized following general procedure starting from 1 g of cyanoepoxide and was isolated as a white solid (900 mg, 53% yield). (Dichloromethane/MeOH/Acetic acid : 9/0.5/0.5, R<sub>f</sub> = 0.41). **Mp**: 161°C. **<sup>1</sup>H NMR** (300 MHz, DMSO) δ 6.78 (d, *J* = 4.5 Hz, 1H), 5.10 (d, *J* = 4.4 Hz, 1H), 1.97-1.75 (m, 2H), 1.45-1.22 (m, 6H). **<sup>13</sup>C NMR** (75 MHz, DMSO) δ 156.68, 75.15, 70.60, 33.55, 33.11, 23.41, 23.30. **IR** (cm<sup>-1</sup>) ν<sub>max</sub>: 3377, 2973, 2958, 2874, 2595, 2117, 1452, 1250, 1071, 948. **HRMS** (ESI, TOF MS) *m/z* calculated for [M+H]<sup>+</sup>: 210.1103, found: 210.1104

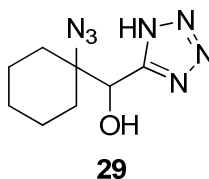

*(1-Azido-cyclohexyl)-(1H-tetrazol-5-yl)-methanol*

Tetrazole**29** was synthesized following general procedure starting from 500 mg of cyanoepoxide**14** and was isolated as a white solid (610 mg, 75% yield). (Dichloromethane/MeOH/Acetic acid: 9/0.5/0.5, R<sub>f</sub> = 0.47). **Mp**: 175°C. **<sup>1</sup>H NMR** (300 MHz, DMSO) δ 6.80 (d, *J* = 4.8 Hz, 1H), 5.06 (d, *J* = 4.8 Hz, 1H), 2.23–0.91 (m, 10H). **<sup>13</sup>C NMR** (75 MHz, DMSO) δ 156.01, 71.40, 65.48, 30.23, 29.77, 24.54, 21.39, 21.14. **IR** (cm<sup>-1</sup>) ν<sub>max</sub>: 3369, 2938, 2857, 2582, 2102, 1449, 1255, 1120, 1065, 952. **HRMS** (ESI, TOF MS) *m/z* calculated for [M+H]<sup>+</sup>: 224.1260, found: 224.1264.

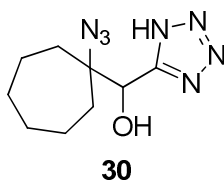

*(1-Azido-cycloheptyl)-(1H-tetrazol-5-yl)-methanol*

Tetrazole**30** was synthesized following general procedure starting from 1 g of cyanoepoxide**15** and was isolated as a white solid (1.2 g, 76% yield). (Dichloromethane/MeOH/Acetic acid: 9/0.5/0.5,  $R_f = 0.45$ ). **Mp**: 172°C. **<sup>1</sup>H NMR** (300 MHz, DMSO)  $\delta$  6.81 (d,  $J = 4.8$  Hz, 1H), 5.00 (d,  $J = 4.8$  Hz, 1H), 2.19–1.04 (m, 12H). **<sup>13</sup>C NMR** (75 MHz, DMSO)  $\delta$  156.21, 70.95, 68.96, 33.67, 33.07, 28.91, 28.88, 21.75, 21.66. **IR** ( $\text{cm}^{-1}$ )  $\nu_{\text{max}}$ : 3348, 2932, 2856, 2105, 1458, 1436, 1257, 1066, 942. **HRMS** (ESI, TOF MS)  $m/z$  calculated for  $[\text{M}+\text{H}]^+$ : 238.1416, found: 238.1408.

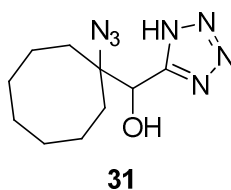

*(1-Azido-cyclooctyl)-(1H-tetrazol-5-yl)-methanol*

Tetrazole**31** was synthesized following general procedure starting from 600 mg of cyanoepoxide**16** and was isolated as a white solid (470 mg, 51% yield). (Dichloromethane/MeOH/Acetic acid: 9/0.5/0.5,  $R_f = 0.44$ ). **Mp**: 186°C. **<sup>1</sup>H NMR** (300 MHz, DMSO)  $\delta$  6.76 (d,  $J = 4.6$  Hz, 1H), 5.06 (d,  $J = 4.6$  Hz, 1H), 2.23–1.88 (m, 2H), 1.77–1.18 (m, 12H). **<sup>13</sup>C NMR** (75 MHz, DMSO)  $\delta$  156.26, 70.09, 68.91, 29.79, 28.06, 27.71, 27.21, 24.10, 21.49, 21.26. **IR** ( $\text{cm}^{-1}$ )  $\nu_{\text{max}}$ : 3333, 2931, 2588, 2104, 1742, 1447, 1253, 1083, 1058. **HRMS** (ESI, TOF MS)  $m/z$  calculated for  $[\text{M}+\text{H}]^+$ : 252.1573, found: 252.1576.



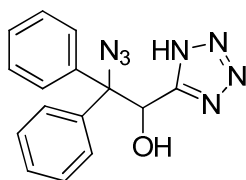

**32**

*2-Azido-2,2-diphenyl-1-(1H-tetrazol-5-yl)-ethanol*

Tetrazole**32** was synthesized following general procedure starting from 2g of cyanoepoxide**17** and was isolated as white solid(1.7 g, 61% yield).(Dichloromethane/MeOH/Acetic acid: 9/0.5/0.5, Rf = 0.21).**Mp**: 205°C.<sup>1</sup>**H NMR** (300 MHz, DMSO)  $\delta$  7.63–7.29 (m, 5H), 7.22–6.99 (m, 6H), 6.39 (d,  $J$  = 4.2 Hz, 1H). <sup>13</sup>**C NMR** (75 MHz, DMSO)  $\delta$  155.27, 140.06, 128.56, 127.95, 127.93, 127.71, 127.25, 126.11, 74.31, 69.88.**IR** (cm<sup>-1</sup>)  $\nu_{\max}$ : 3333, 2110, 1446, 1268, 1100, 1062, 744, 720, 699, 592. **HRMS** (ESI, TOF MS)  $m/z$  calculated for [M+H]<sup>+</sup>: 308.1260, found: 308.1252.

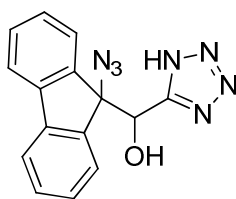

**33**

*(9-Azido-9H-fluoren-9-yl)-(1H-tetrazol-5-yl)-methanol*

Tetrazole**33** was synthesized following general procedure starting from 2g of cyanoepoxide**18** and was isolated as white solid(1.7 g, 61% yield). (Dichloromethane/MeOH/Acetic acid: 9/0.5/0.5, Rf = 0.21).**Mp**: 213°C.<sup>1</sup>**H NMR** (300 MHz, DMSO)  $\delta$  7.82 (d,  $J$  = 6.9 Hz, 2H), 7.57–7.35 (m, 6H), 7.31 (d,  $J$  = 5.0 Hz, 1H), 5.68 (d,  $J$  = 4.8 Hz, 1H). <sup>13</sup>**C NMR** (75 MHz, DMSO)  $\delta$  155.35, 141.47, 140.69, 140.13, 139.92, 129.87, 127.94, 127.81, 125.47, 125.14, 120.44, 74.21, 69.45.**IR** (cm<sup>-1</sup>)  $\nu_{\max}$ : 3393, 2646, 2110, 1451, 1250, 1112, 1085, 744, 733. **HRMS** (ESI, TOF MS)  $m/z$  calculated for [M+H]<sup>+</sup>: 306.1103, found: 306.1111.

## General procedure for the reaction of $\alpha$ -Hydroxy- $\beta$ -Azido Tetrazoles with triphenylphosphine

A solution of tetrazole and triphenylphosphine (1.2 equiv.) in THF (20 mL/mmol) was stirred at reflux for 2h. The reaction mixture was cooled down to room temperature and triethylamine (3 equiv.) followed by acetic anhydride (3 equiv.) were added and the mixture was stirred at room temperature for 1h. Usual workup (water and EtOAc) gave a residue that was purified by flash chromatography on silica gel.

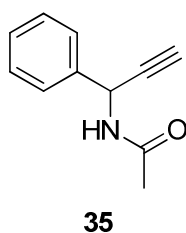

### *N*-(1-Phenyl-prop-2-ynyl)-acetamide

Acetamide **35** was synthesized following the general procedure starting from 100 mg of **2** and purified by flash chromatography using PE/EtOAc 7:3 as eluant. The product was isolated as a white solid (39 mg, 52% yield). **Mp**: 80°C. **<sup>1</sup>H NMR** (200 MHz, CDCl<sub>3</sub>)  $\delta$  7.65–7.30 (m, 5H), 6.36 (d,  $J$  = 7.9 Hz, 1H), 6.01 (dd,  $J$  = 8.5, 2.4 Hz, 1H), 2.49 (d,  $J$  = 2.4 Hz, 1H), 2.00 (s, 3H). **<sup>13</sup>C NMR** (75 MHz, CDCl<sub>3</sub>)  $\delta$  167.98, 137.24, 127.71, 127.21, 126.01, 80.72, 71.93, 43.44, 22.06. **IR** (cm<sup>-1</sup>)  $\nu_{\text{max}}$ : 3291, 3063, 2929, 1651, 1538, 1493, 1446, 1370, 1307, 1262, 1098, 1076, 756, 742, 696, 652, 596, 561. **HRMS** (ESI, TOF MS)  $m/z$  calculated for [M+H]<sup>+</sup>: 306.1103, found: 306.1111.

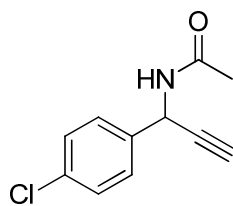

**36**

*N*-(1-(4-chlorophenyl)prop-2-yn-1-yl)acetamide

Acetamide **36** was synthesized following the general procedure starting from 102 mg of **23** and purified by flash chromatography using PE/EtOAc7:3 as eluant. The product was isolated as a white solid (57 mg, 71% yield). **Mp**: 114°C. **<sup>1</sup>H NMR** (200 MHz, CDCl<sub>3</sub>) δ 7.50-7.40 (m, 2H), 7.37-7.28 (m, 2H), 6.25 (d, *J* = 8.0 Hz, 1H), 5.98 (dd, *J* = 8.4, 2.4 Hz, 1H), 2.51 (d, *J* = 2.4 Hz, 1H), 2.02 (s, 3H). **<sup>13</sup>C NMR** (75 MHz, CDCl<sub>3</sub>) δ 169.03, 136.89, 134.13, 128.86, 128.47, 81.20, 73.45, 43.91, 23.11. **IR** (cm<sup>-1</sup>) *v*<sub>max</sub>: 3282, 1648, 1525, 1490, 1366, 1300, 1281, 1094, 1013, 657, 595, 559. **HRMS** (ESI, TOF MS) *m/z* calculated for [M+H]<sup>+</sup>: 230.0349, found: 230.0346.

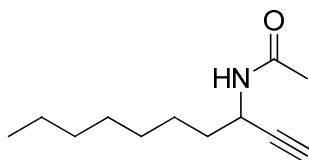

**37**

*N*-(dec-1-yn-3-yl)acetamide

Acetamide **37** was synthesized following the general procedure starting from 131 mg of **26** and purified by flash chromatography using PE/EtOAc7:3 as eluant. The product was isolated as an oil crystallizing on standing (30 mg, 30% yield). **Mp**: 57°C. **<sup>1</sup>H NMR** (200 MHz, CDCl<sub>3</sub>) δ 5.70 (d, *J* = 8.2 Hz, 1H), 4.72 (m, 1H), 2.25 (d, *J* = 2.4 Hz, 1H), 1.99 (s, 3H), 1.73-1.57 (m, 2H), 1.50-1.15 (m, 10H), 0.93-0.80 (m, 3H). **<sup>13</sup>C NMR** (75 MHz, CDCl<sub>3</sub>) δ 169.12, 136.89, 83.42, 71.16, 41.48, 35.85, 31.87, 29.27, 29.9, 25.67, 23.39, 22.75, 14.22. **IR** (cm<sup>-1</sup>) *v*<sub>max</sub>: 3284, 3251, 2951, 2852, 1634, 1542, 1370, 745, 675, 605, 544. **HRMS** (ESI, TOF MS) *m/z* calculated for [M+H]<sup>+</sup>: 196.1701, found: 196.1700.

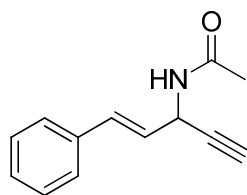

**38**

*(E)-N-(1-phenylpent-1-en-4-yn-3-yl)acetamide*

Acetamide **38** was synthesized following the general procedure starting from 73 mg of **25** and purified by flash chromatography using PE/EtOAc 6:4 as eluant. The product was isolated as a white solid (13 mg, 23% yield). **Mp**: 119°C.  $^1\text{H NMR}$  (200 MHz,  $\text{CDCl}_3$ )  $\delta$  7.45-7.25 (m, 5H), 6.85 (dd,  $J = 15.8, 1.5$  Hz, 1H), 6.16 (dd,  $J = 15.8, 5.2$  Hz, 1H), 6.00 (d,  $J = 8.0$  Hz, 1H), 5.66-5.52 (m, 1H), 2.50 (d,  $J = 2.2$  Hz, 1H), 2.04 (s, 3H).  $^{13}\text{C NMR}$  (75 MHz,  $\text{CDCl}_3$ )  $\delta$  169.09, 135.99, 132.47, 128.75, 128.26, 126.82, 125.32, 80.88, 73.40, 42.56, 23.31. **IR** ( $\text{cm}^{-1}$ )  $\nu_{\text{max}}$ : 3290, 1642, 1535, 1446, 1370, 966, 749, 640, 545. **HRMS** (ESI, TOF MS)  $m/z$  calculated for  $[\text{M}+\text{H}]^+$ : 200.1075, found: 200.1076.

### Procedure for the hydrogenation of **19**

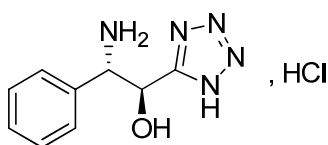

**39**

To a solution of tetrazole **19** (252 mg, 1.09 mmol) in a MeOH/HCl 0.5 N 5:3 mixture (20 mL) was added Pd/C 10% (100 mg). The reaction mixture was stirred overnight under hydrogen pressure (0.5 bar) and filtered on Celite using a MeOH/HCl 0.5 N 1:1 mixture as eluent. The solvent was then removed and product **39** collected as a white solid (264 mg, quant. yield).

**Mp**: 182°C.  $^1\text{H NMR}$  (200 MHz, MeOD)  $\delta$  7.32 (s, 5H), 5.68 (d,  $J = 8.0$  Hz, 1H), 4.75 (d,  $J = 8.0$  Hz, 1H).  $^{13}\text{C NMR}$  (75 MHz, MeOD)  $\delta$  133.28, 130.6, 129.83, 129.63, 67.13,

59.31. **IR**( $\text{cm}^{-1}$ )  $\nu_{\text{max}}$ : 2790, 1588, 1503, 1454, 1135, 1059, 712, 702. **HRMS** (ESI, TOF MS)

$m/z$  calculated for  $[\text{M}+\text{H}]^+$ : 206.1042, found: 206.1045.

## X-Ray Data for Compound 2

### Crystal data

$\text{C}_9\text{H}_9\text{N}_7\text{O}$

$M_r = 231.23$

Orthorhombic,  $Pca2_1$

$a = 9.9162$  (8) Å

$b = 14.8123$  (11) Å

$c = 7.3118$  (6) Å

$V = 1073.97$  (15) Å<sup>3</sup>

$Z = 4$

$F(000) = 480$

$D_x = 1.430$  Mg m<sup>-3</sup>

Mo  $K\alpha$  radiation,  $\lambda = 0.71073$  Å

Cell parameters from 9531 reflections

$\theta = 2.8$ – $30.0^\circ$

$\mu = 0.10$  mm<sup>-1</sup>

$T = 200$  K

Platelet, colorless

$0.30 \times 0.22 \times 0.02$  mm

### Data collection

Bruker APEX-II CCD

diffractometer

Radiation source: fine-focus sealed tube

Graphite monochromator

$\phi$  and  $\omega$  scans

Absorption correction: multi-scan

SADABS (Sheldrick, V2.10)

$T_{\text{min}} = 0.970$ ,  $T_{\text{max}} = 0.998$

33251 measured reflections

1687 independent reflections

1462 reflections with  $I > 2\sigma(I)$

$R_{\text{int}} = 0.055$

$\theta_{\text{max}} = 30.1^\circ$ ,  $\theta_{\text{min}} = 2.5^\circ$

$h = -13 \rightarrow 13$

$k = -20 \rightarrow 20$

$l = -10 \rightarrow 10$

### Refinement

Refinement on  $F^2$

Least-squares matrix: full

$R[F^2 > 2\sigma(F^2)] = 0.037$

$wR(F^2) = 0.087$

$S = 1.06$

1687 reflections

159 parameters

1 restraint

Primary atom site location: structure-invariant direct methods

Secondary atom site location: difference Fourier map

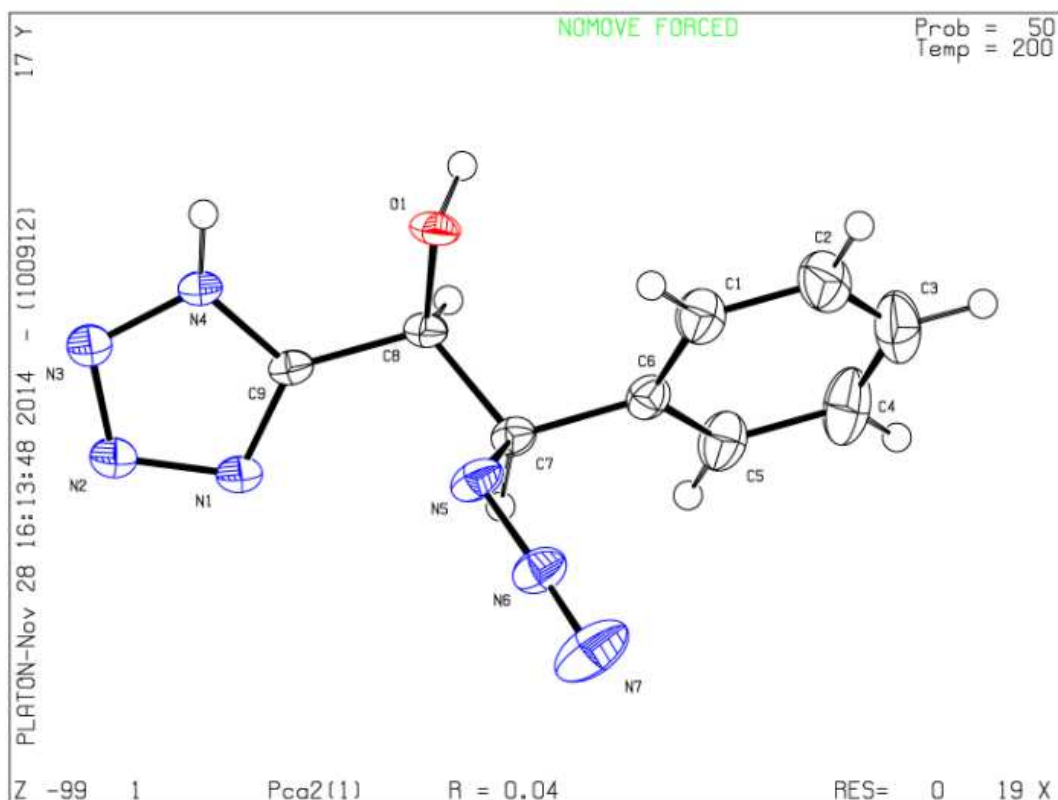

Fractional atomic coordinates and isotropic or equivalent isotropic displacement parameters ( $\text{\AA}^2$ )

|     | x            | y            | z            | $U_{iso}^*/U_{eq}$ |
|-----|--------------|--------------|--------------|--------------------|
| O1  | 0.77909 (10) | 0.33818 (9)  | 0.97153 (19) | 0.0239 (3)         |
| H1A | 0.8271       | 0.3252       | 0.8806       | 0.036*             |
| C1  | 0.65461 (19) | 0.15180 (13) | 0.9496 (3)   | 0.0317 (4)         |
| H1  | 0.7152       | 0.1693       | 1.0438       | 0.038*             |
| C2  | 0.6663 (2)   | 0.06717 (14) | 0.8695 (4)   | 0.0413 (6)         |
| H2  | 0.7358       | 0.0273       | 0.9082       | 0.050*             |
| C3  | 0.5779 (3)   | 0.04042 (14) | 0.7341 (4)   | 0.0464 (6)         |
| H3  | 0.5856       | -0.0180      | 0.6813       | 0.056*             |
| C4  | 0.4786 (3)   | 0.09867 (15) | 0.6759 (4)   | 0.0479 (6)         |
| H4  | 0.4180       | 0.0805       | 0.5822       | 0.057*             |
| C5  | 0.4666 (2)   | 0.18395 (13) | 0.7538 (3)   | 0.0338 (4)         |
| H5  | 0.3982       | 0.2239       | 0.7121       | 0.041*             |
| C6  | 0.55379 (17) | 0.21136 (12) | 0.8919 (3)   | 0.0235 (4)         |
| C7  | 0.53840 (16) | 0.30450 (11) | 0.9729 (2)   | 0.0202 (3)         |
| H7  | 0.4503       | 0.3301       | 0.9312       | 0.024*             |
| C8  | 0.65116 (15) | 0.36817 (11) | 0.9114 (2)   | 0.0187 (3)         |
| H8  | 0.6516       | 0.3704       | 0.7747       | 0.022*             |
| C9  | 0.63538 (14) | 0.46257 (11) | 0.9829 (2)   | 0.0184 (3)         |
| N1  | 0.52530 (13) | 0.51005 (10) | 1.0133 (2)   | 0.0242 (3)         |
| N2  | 0.56736 (14) | 0.59316 (10) | 1.0724 (3)   | 0.0284 (4)         |
| N3  | 0.69765 (14) | 0.59628 (10) | 1.0788 (3)   | 0.0276 (3)         |
| N4  | 0.74110 (14) | 0.51482 (9)  | 1.0227 (2)   | 0.0214 (3)         |
| H4A | 0.824 (2)    | 0.5036 (16)  | 1.020 (4)    | 0.042 (7)*         |
| N5  | 0.53920 (15) | 0.30304 (12) | 1.1780 (2)   | 0.0264 (3)         |
| N6  | 0.44715 (16) | 0.25587 (11) | 1.2417 (3)   | 0.0284 (3)         |
| N7  | 0.3683 (2)   | 0.21459 (16) | 1.3123 (3)   | 0.0519 (6)         |

*Atomic displacement parameters ( $\text{\AA}^2$ )*

|    | $U^{11}$    | $U^{22}$    | $U^{33}$    | $U^{12}$     | $U^{13}$     | $U^{23}$     |
|----|-------------|-------------|-------------|--------------|--------------|--------------|
| O1 | 0.0136 (5)  | 0.0320 (6)  | 0.0262 (7)  | 0.0045 (4)   | 0.0017 (5)   | -0.0028 (5)  |
| C1 | 0.0354 (9)  | 0.0272 (9)  | 0.0324 (12) | 0.0002 (7)   | -0.0031 (9)  | 0.0049 (8)   |
| C2 | 0.0507 (13) | 0.0252 (10) | 0.0479 (14) | 0.0041 (9)   | 0.0080 (11)  | 0.0091 (10)  |
| C3 | 0.0727 (16) | 0.0249 (10) | 0.0416 (13) | -0.0058 (10) | 0.0103 (13)  | -0.0023 (10) |
| C4 | 0.0683 (16) | 0.0359 (12) | 0.0395 (13) | -0.0145 (11) | -0.0112 (13) | -0.0078 (11) |
| C5 | 0.0372 (10) | 0.0314 (10) | 0.0327 (10) | -0.0053 (8)  | -0.0089 (9)  | -0.0008 (9)  |
| C6 | 0.0247 (8)  | 0.0238 (8)  | 0.0219 (9)  | -0.0041 (6)  | 0.0016 (7)   | 0.0018 (7)   |
| C7 | 0.0171 (7)  | 0.0259 (8)  | 0.0175 (8)  | -0.0015 (6)  | -0.0018 (6)  | -0.0009 (7)  |

publCIF

2

**structure report**

|    |             |             |             |              |             |             |
|----|-------------|-------------|-------------|--------------|-------------|-------------|
| C8 | 0.0143 (6)  | 0.0240 (8)  | 0.0179 (8)  | 0.0015 (6)   | 0.0002 (6)  | -0.0003 (7) |
| C9 | 0.0141 (6)  | 0.0249 (8)  | 0.0163 (8)  | -0.0011 (5)  | 0.0000 (6)  | 0.0007 (6)  |
| N1 | 0.0153 (6)  | 0.0266 (7)  | 0.0309 (9)  | 0.0005 (5)   | 0.0012 (6)  | -0.0023 (7) |
| N2 | 0.0187 (6)  | 0.0283 (7)  | 0.0382 (9)  | 0.0015 (5)   | 0.0017 (7)  | -0.0049 (7) |
| N3 | 0.0195 (6)  | 0.0262 (7)  | 0.0370 (9)  | 0.0002 (5)   | 0.0001 (7)  | -0.0049 (7) |
| N4 | 0.0129 (6)  | 0.0241 (6)  | 0.0272 (8)  | 0.0007 (5)   | 0.0006 (6)  | -0.0011 (6) |
| N5 | 0.0225 (7)  | 0.0382 (9)  | 0.0186 (7)  | -0.0101 (6)  | 0.0019 (6)  | -0.0009 (7) |
| N6 | 0.0247 (7)  | 0.0381 (8)  | 0.0223 (8)  | -0.0069 (6)  | -0.0007 (6) | 0.0010 (7)  |
| N7 | 0.0445 (11) | 0.0704 (14) | 0.0407 (12) | -0.0263 (10) | 0.0018 (9)  | 0.0121 (11) |

Geometric parameters (Å, °)

|           |             |           |             |
|-----------|-------------|-----------|-------------|
| O1—C8     | 1.4143 (18) | C7—N5     | 1.499 (2)   |
| O1—H1A    | 0.8400      | C7—C8     | 1.530 (2)   |
| C1—C2     | 1.389 (3)   | C7—H7     | 1.0000      |
| C1—C6     | 1.398 (3)   | C8—C9     | 1.501 (2)   |
| C1—H1     | 0.9500      | C8—H8     | 1.0000      |
| C2—C3     | 1.380 (4)   | C9—N1     | 1.317 (2)   |
| C2—H2     | 0.9500      | C9—N4     | 1.335 (2)   |
| C3—C4     | 1.377 (4)   | N1—N2     | 1.370 (2)   |
| C3—H3     | 0.9500      | N2—N3     | 1.294 (2)   |
| C4—C5     | 1.391 (3)   | N3—N4     | 1.345 (2)   |
| C4—H4     | 0.9500      | N4—H4A    | 0.84 (2)    |
| C5—C6     | 1.390 (3)   | N5—N6     | 1.240 (2)   |
| C5—H5     | 0.9500      | N6—N7     | 1.119 (2)   |
| C6—C7     | 1.509 (3)   |           |             |
| C8—O1—H1A | 109.5       | C6—C7—C8  | 111.96 (14) |
| C2—C1—C6  | 120.14 (19) | N5—C7—H7  | 108.4       |
| C2—C1—H1  | 119.9       | C6—C7—H7  | 108.4       |
| C6—C1—H1  | 119.9       | C8—C7—H7  | 108.4       |
| C3—C2—C1  | 120.6 (2)   | O1—C8—C9  | 106.12 (13) |
| C3—C2—H2  | 119.7       | O1—C8—C7  | 111.73 (13) |
| C1—C2—H2  | 119.7       | C9—C8—C7  | 113.28 (13) |
| C4—C3—C2  | 119.7 (2)   | O1—C8—H8  | 108.5       |
| C4—C3—H3  | 120.1       | C9—C8—H8  | 108.5       |
| C2—C3—H3  | 120.1       | C7—C8—H8  | 108.5       |
| C3—C4—C5  | 120.2 (2)   | N1—C9—N4  | 107.73 (14) |
| C3—C4—H4  | 119.9       | N1—C9—C8  | 129.97 (14) |
| C5—C4—H4  | 119.9       | N4—C9—C8  | 122.28 (13) |
| C6—C5—C4  | 120.6 (2)   | C9—N1—N2  | 106.30 (13) |
| C6—C5—H5  | 119.7       | N3—N2—N1  | 110.34 (14) |
| C4—C5—H5  | 119.7       | N2—N3—N4  | 106.06 (14) |
| C5—C6—C1  | 118.65 (18) | C9—N4—N3  | 109.57 (14) |
| C5—C6—C7  | 119.30 (16) | C9—N4—H4A | 130.6 (17)  |
| C1—C6—C7  | 122.05 (16) | N3—N4—H4A | 119.8 (18)  |
| N5—C7—C6  | 112.25 (15) | N6—N5—C7  | 112.32 (16) |
| N5—C7—C8  | 107.41 (14) | N7—N6—N5  | 174.5 (2)   |



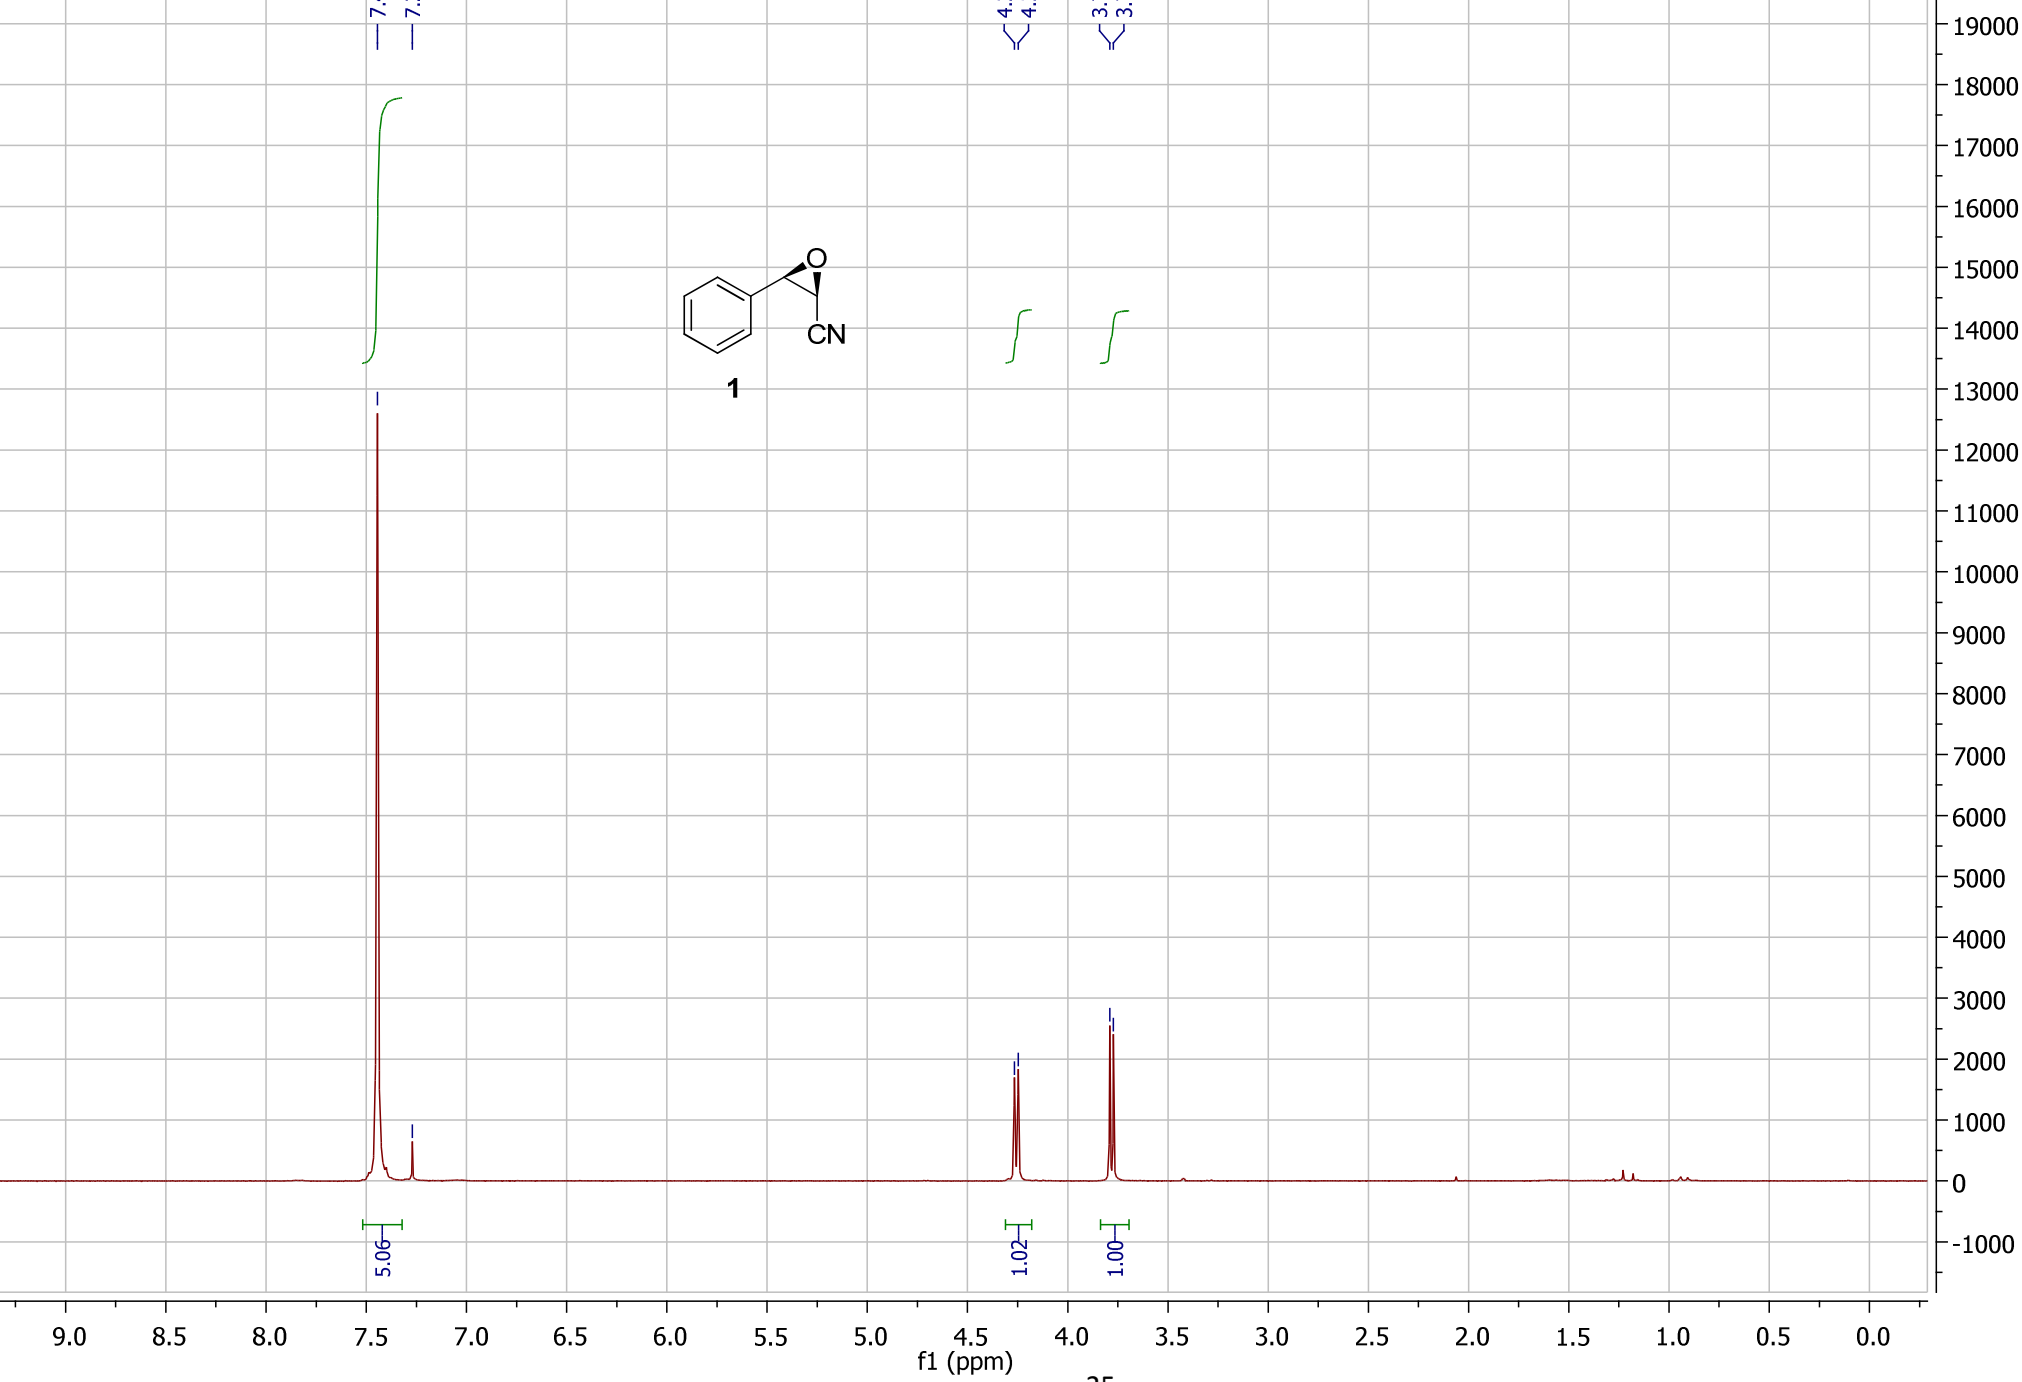

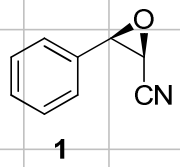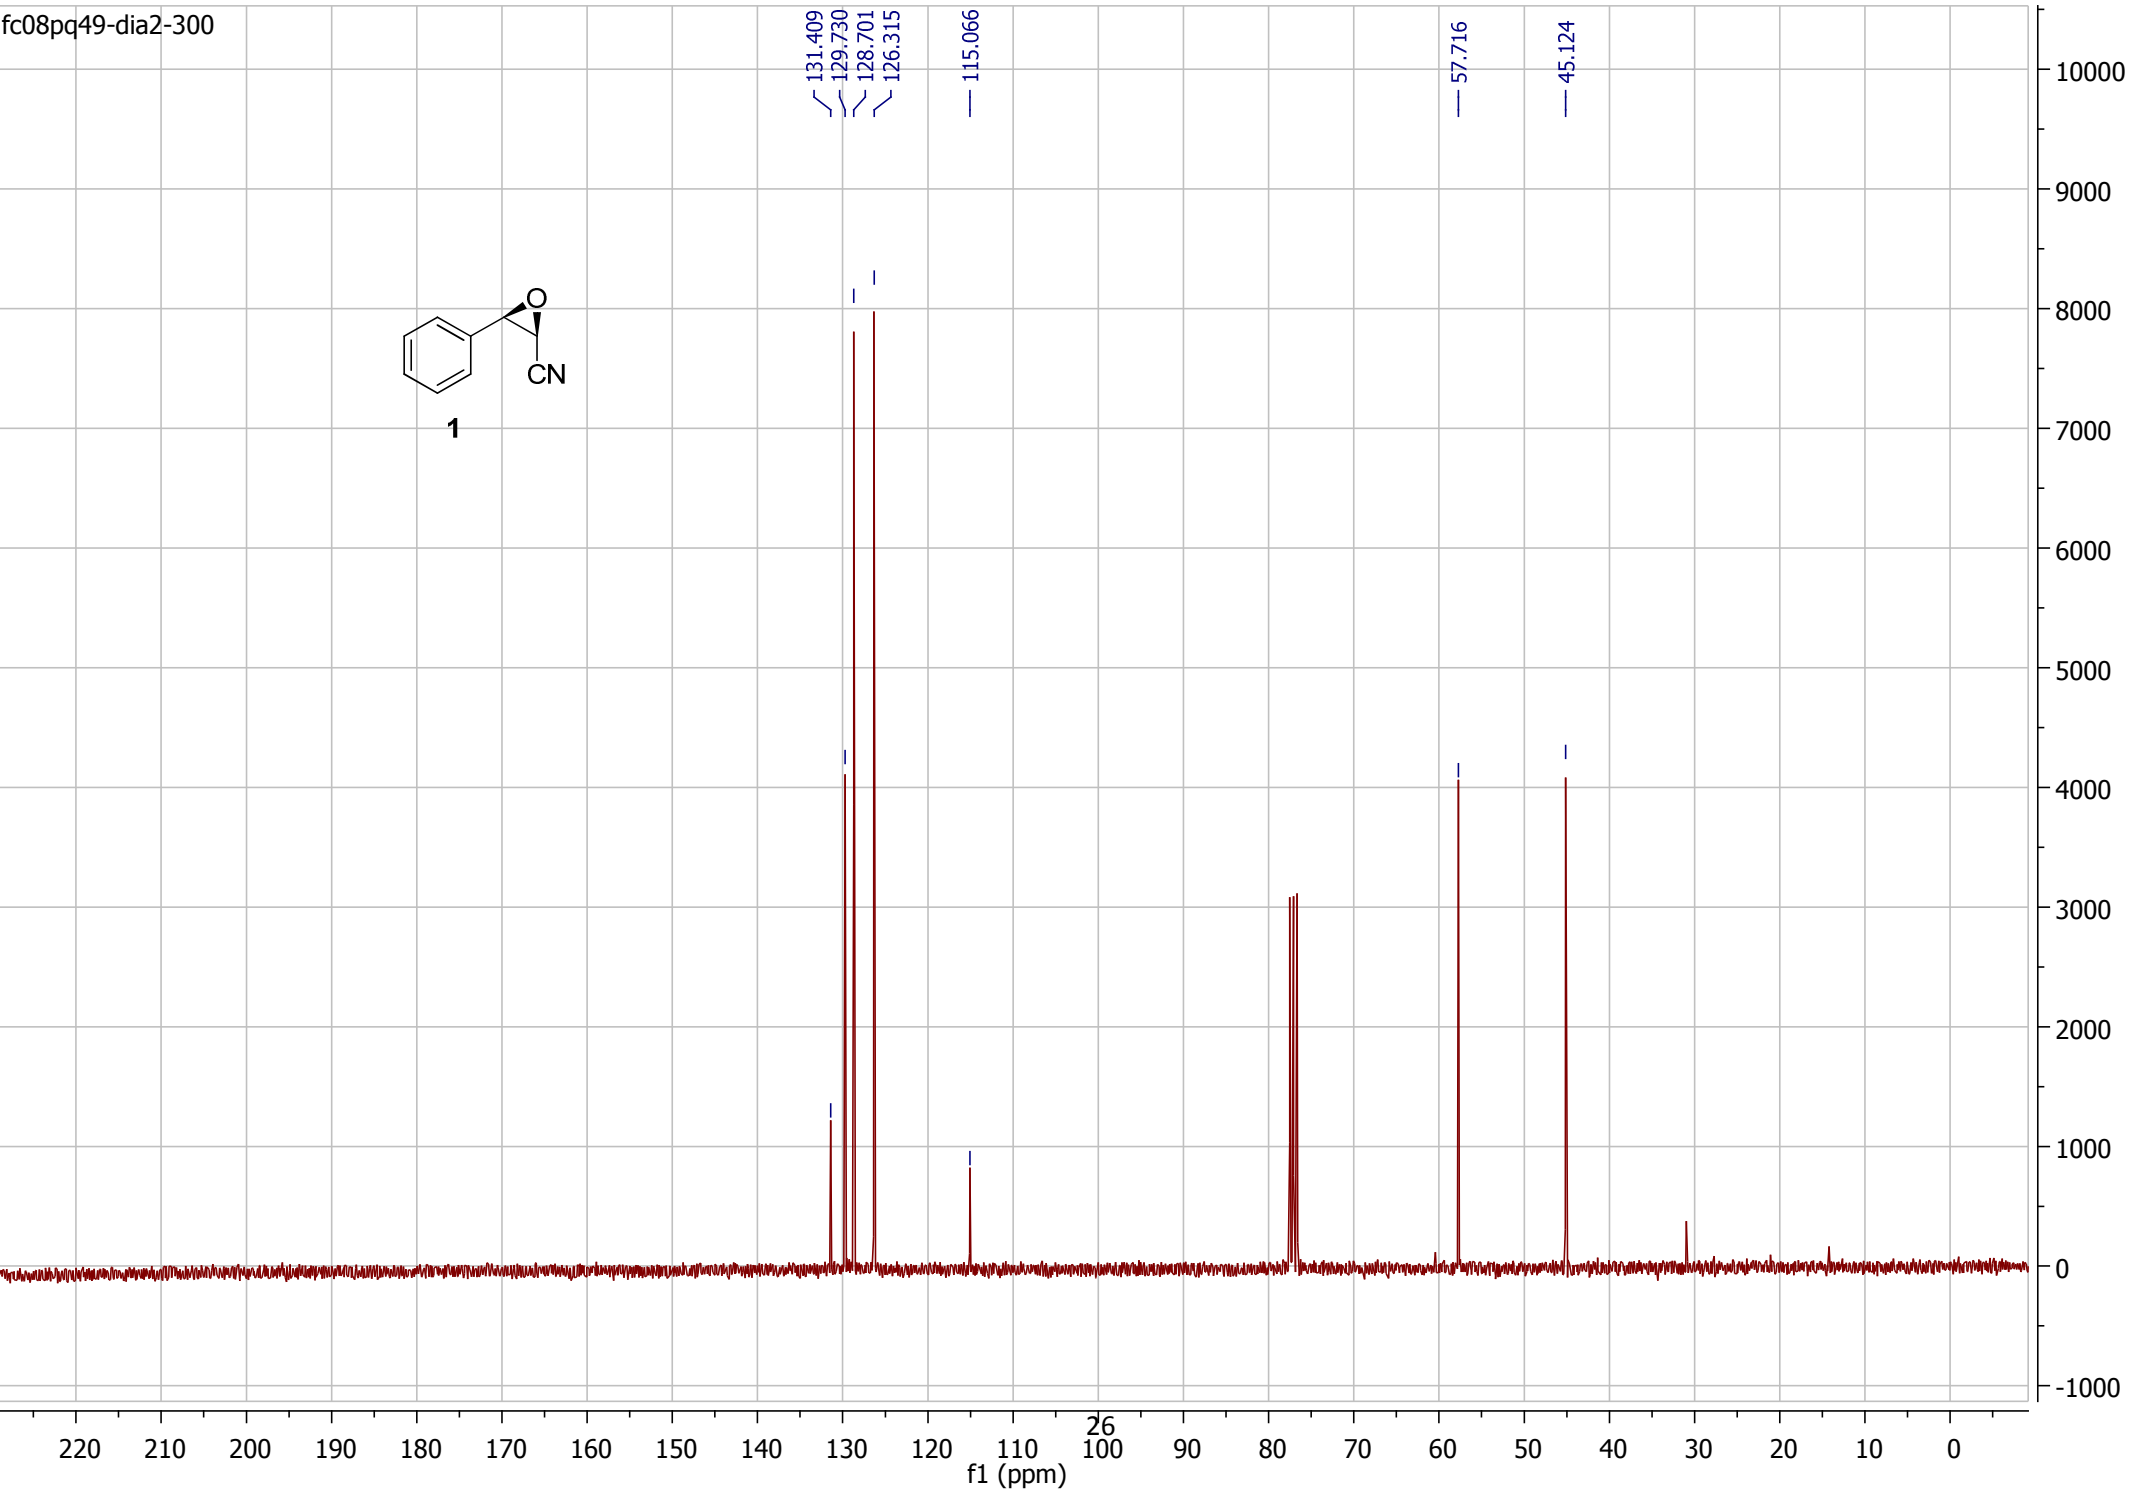

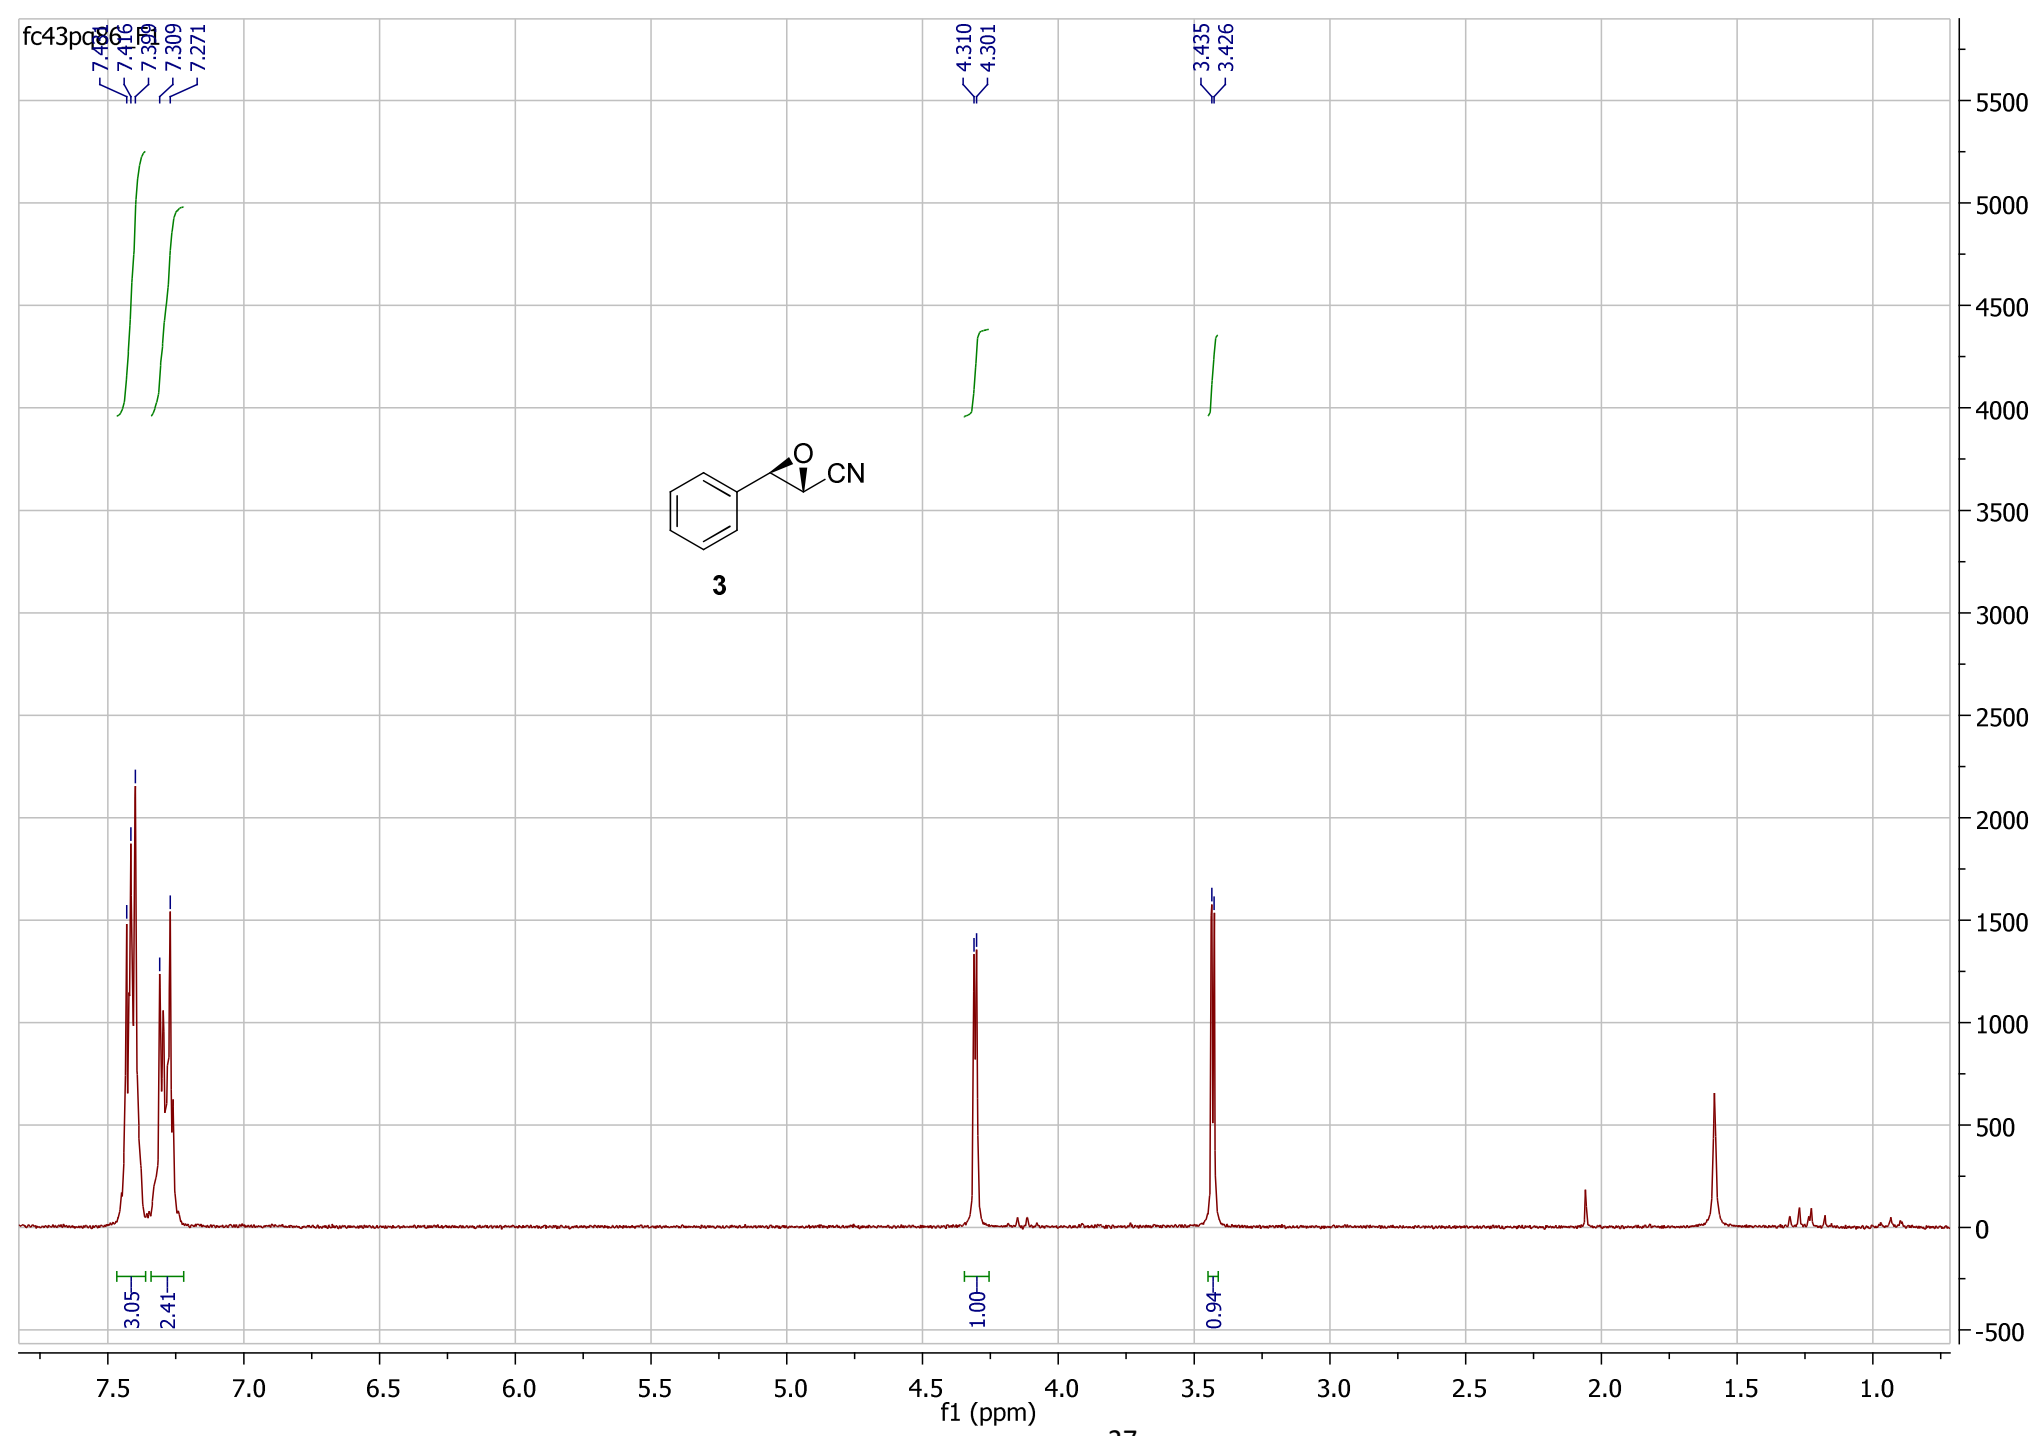

fc08pq49-dia1-300

132.746  
129.843  
128.986  
125.663

116.028

58.494

44.645

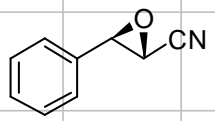

3

28

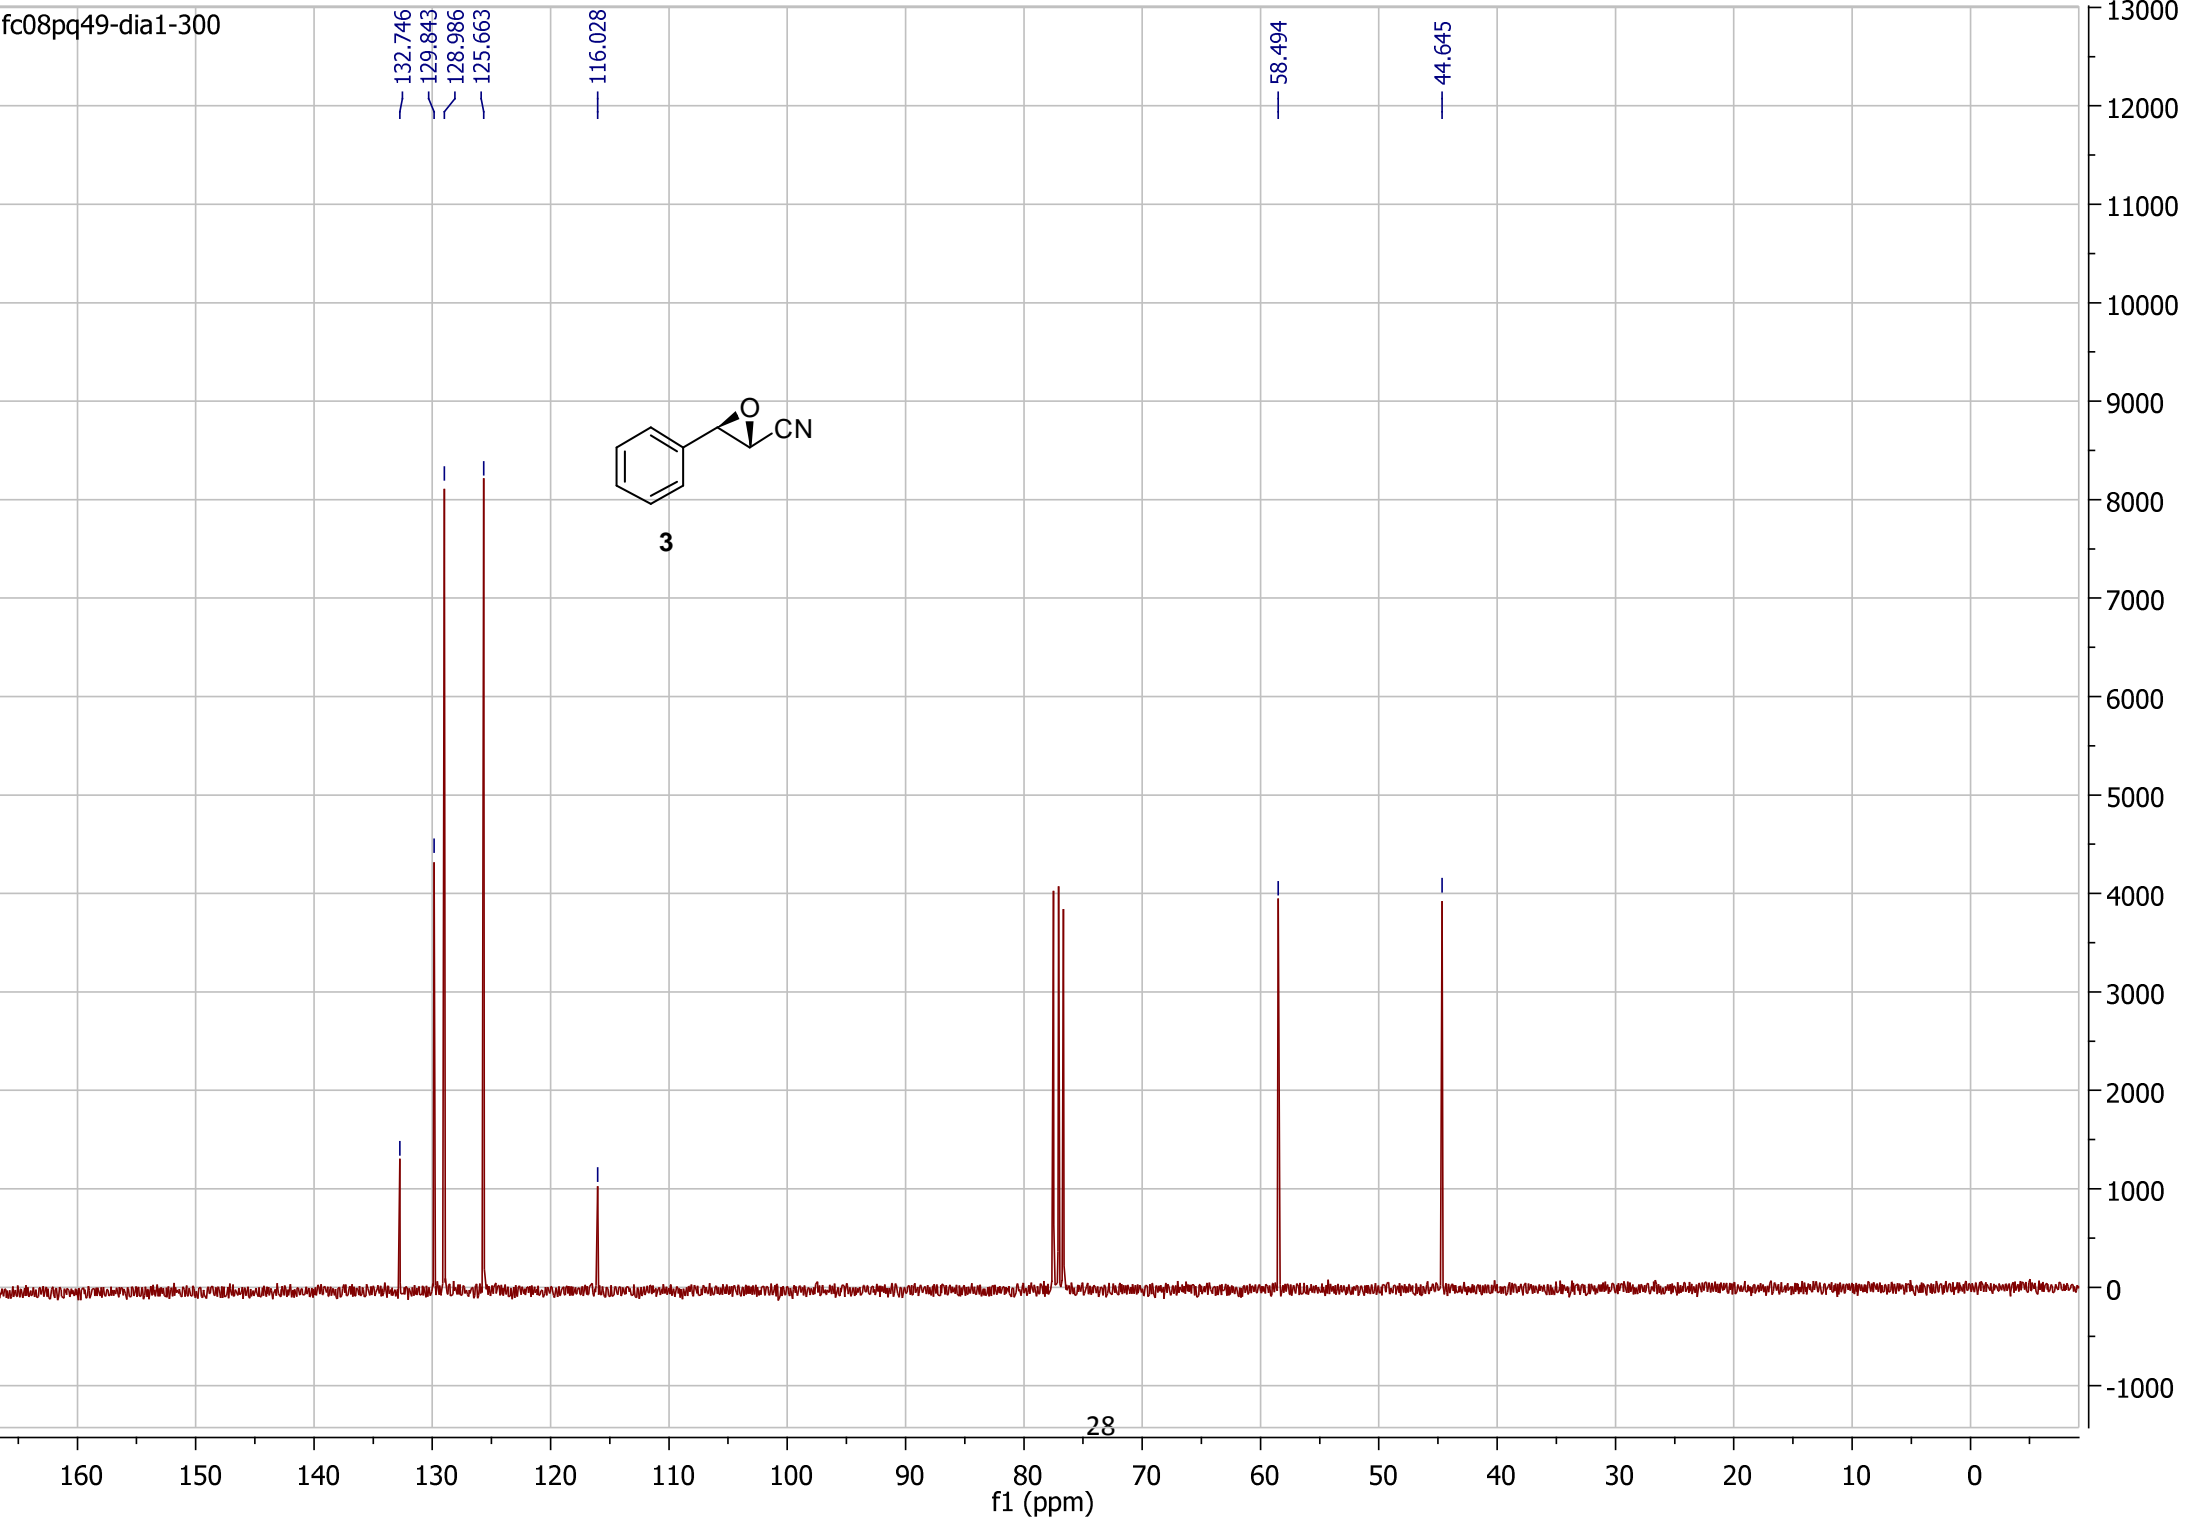

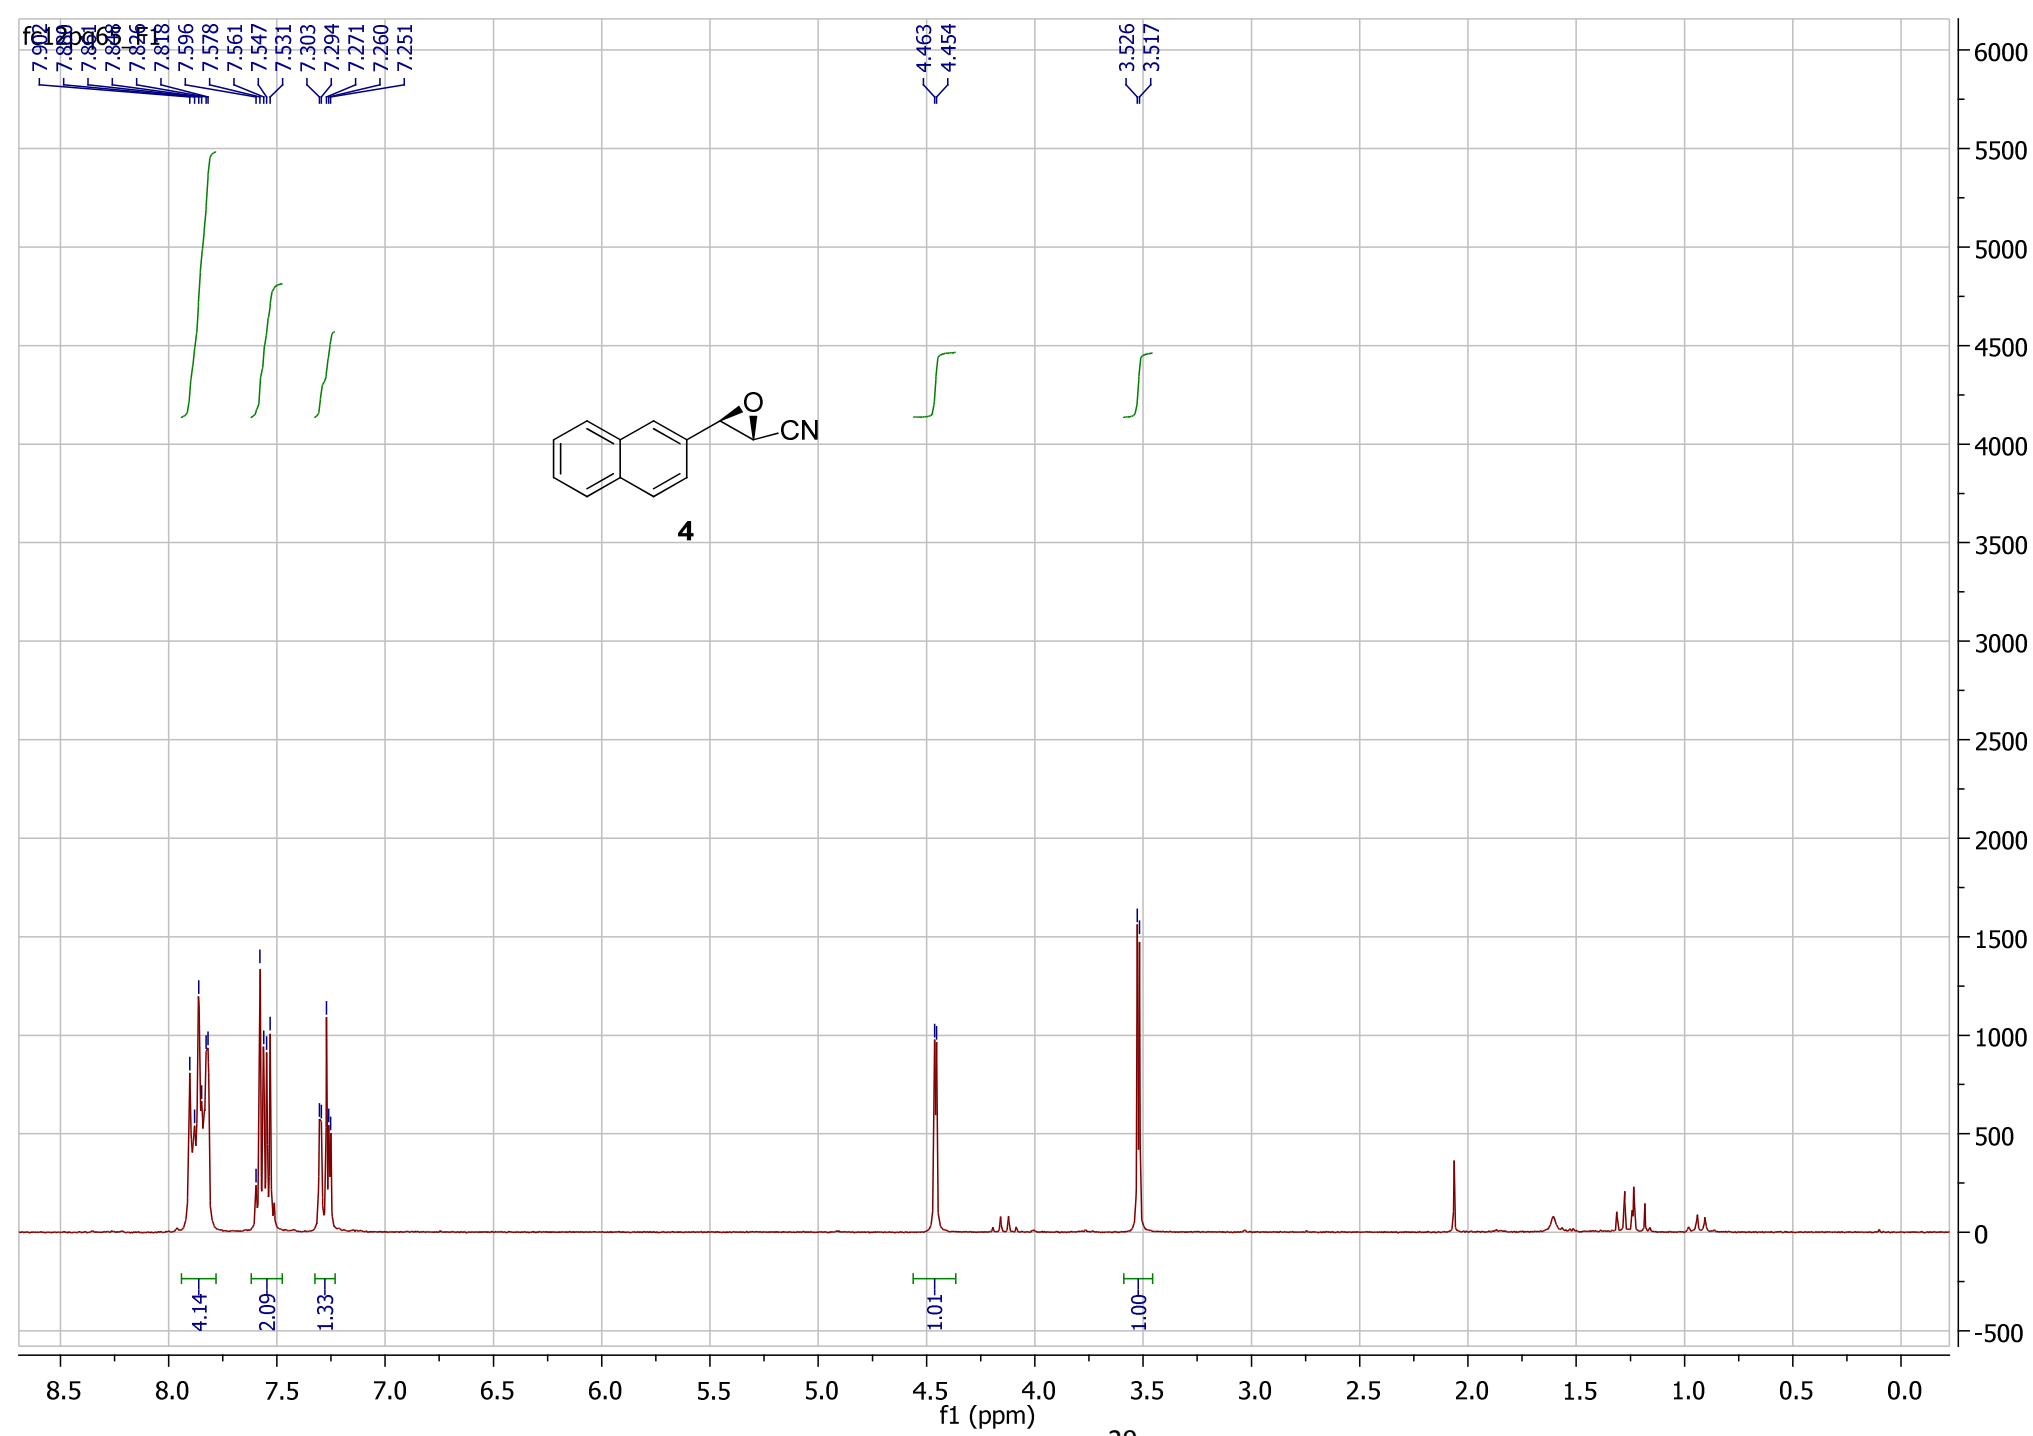

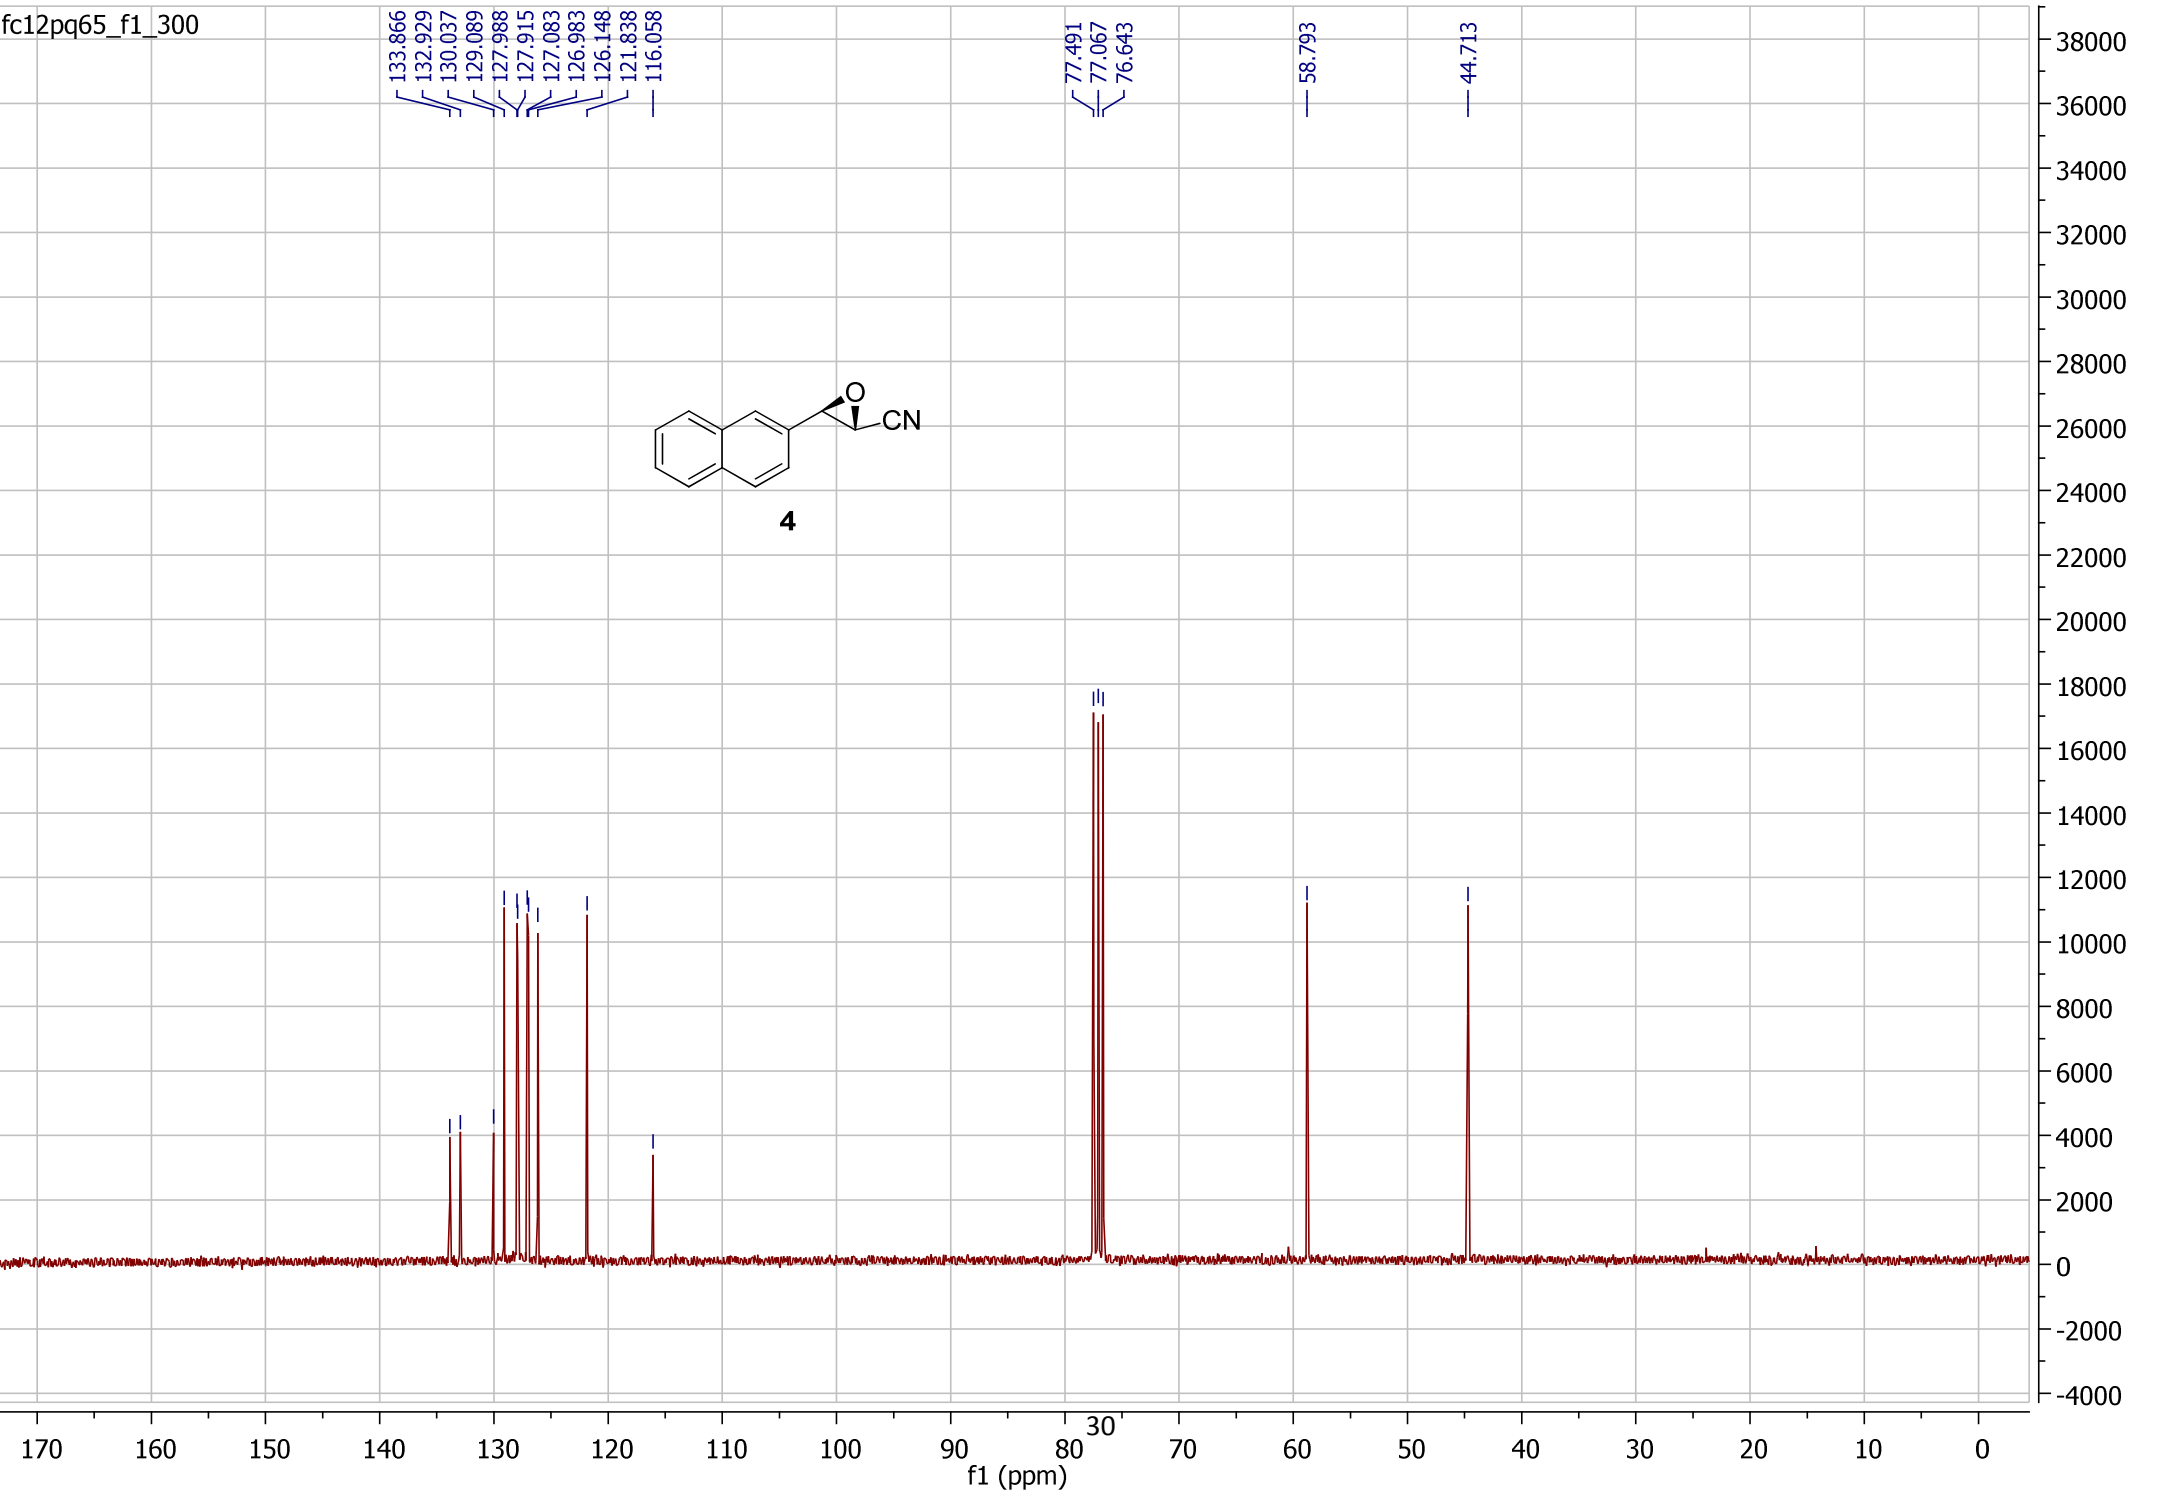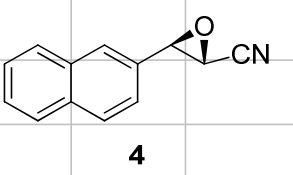

f1 (ppm)

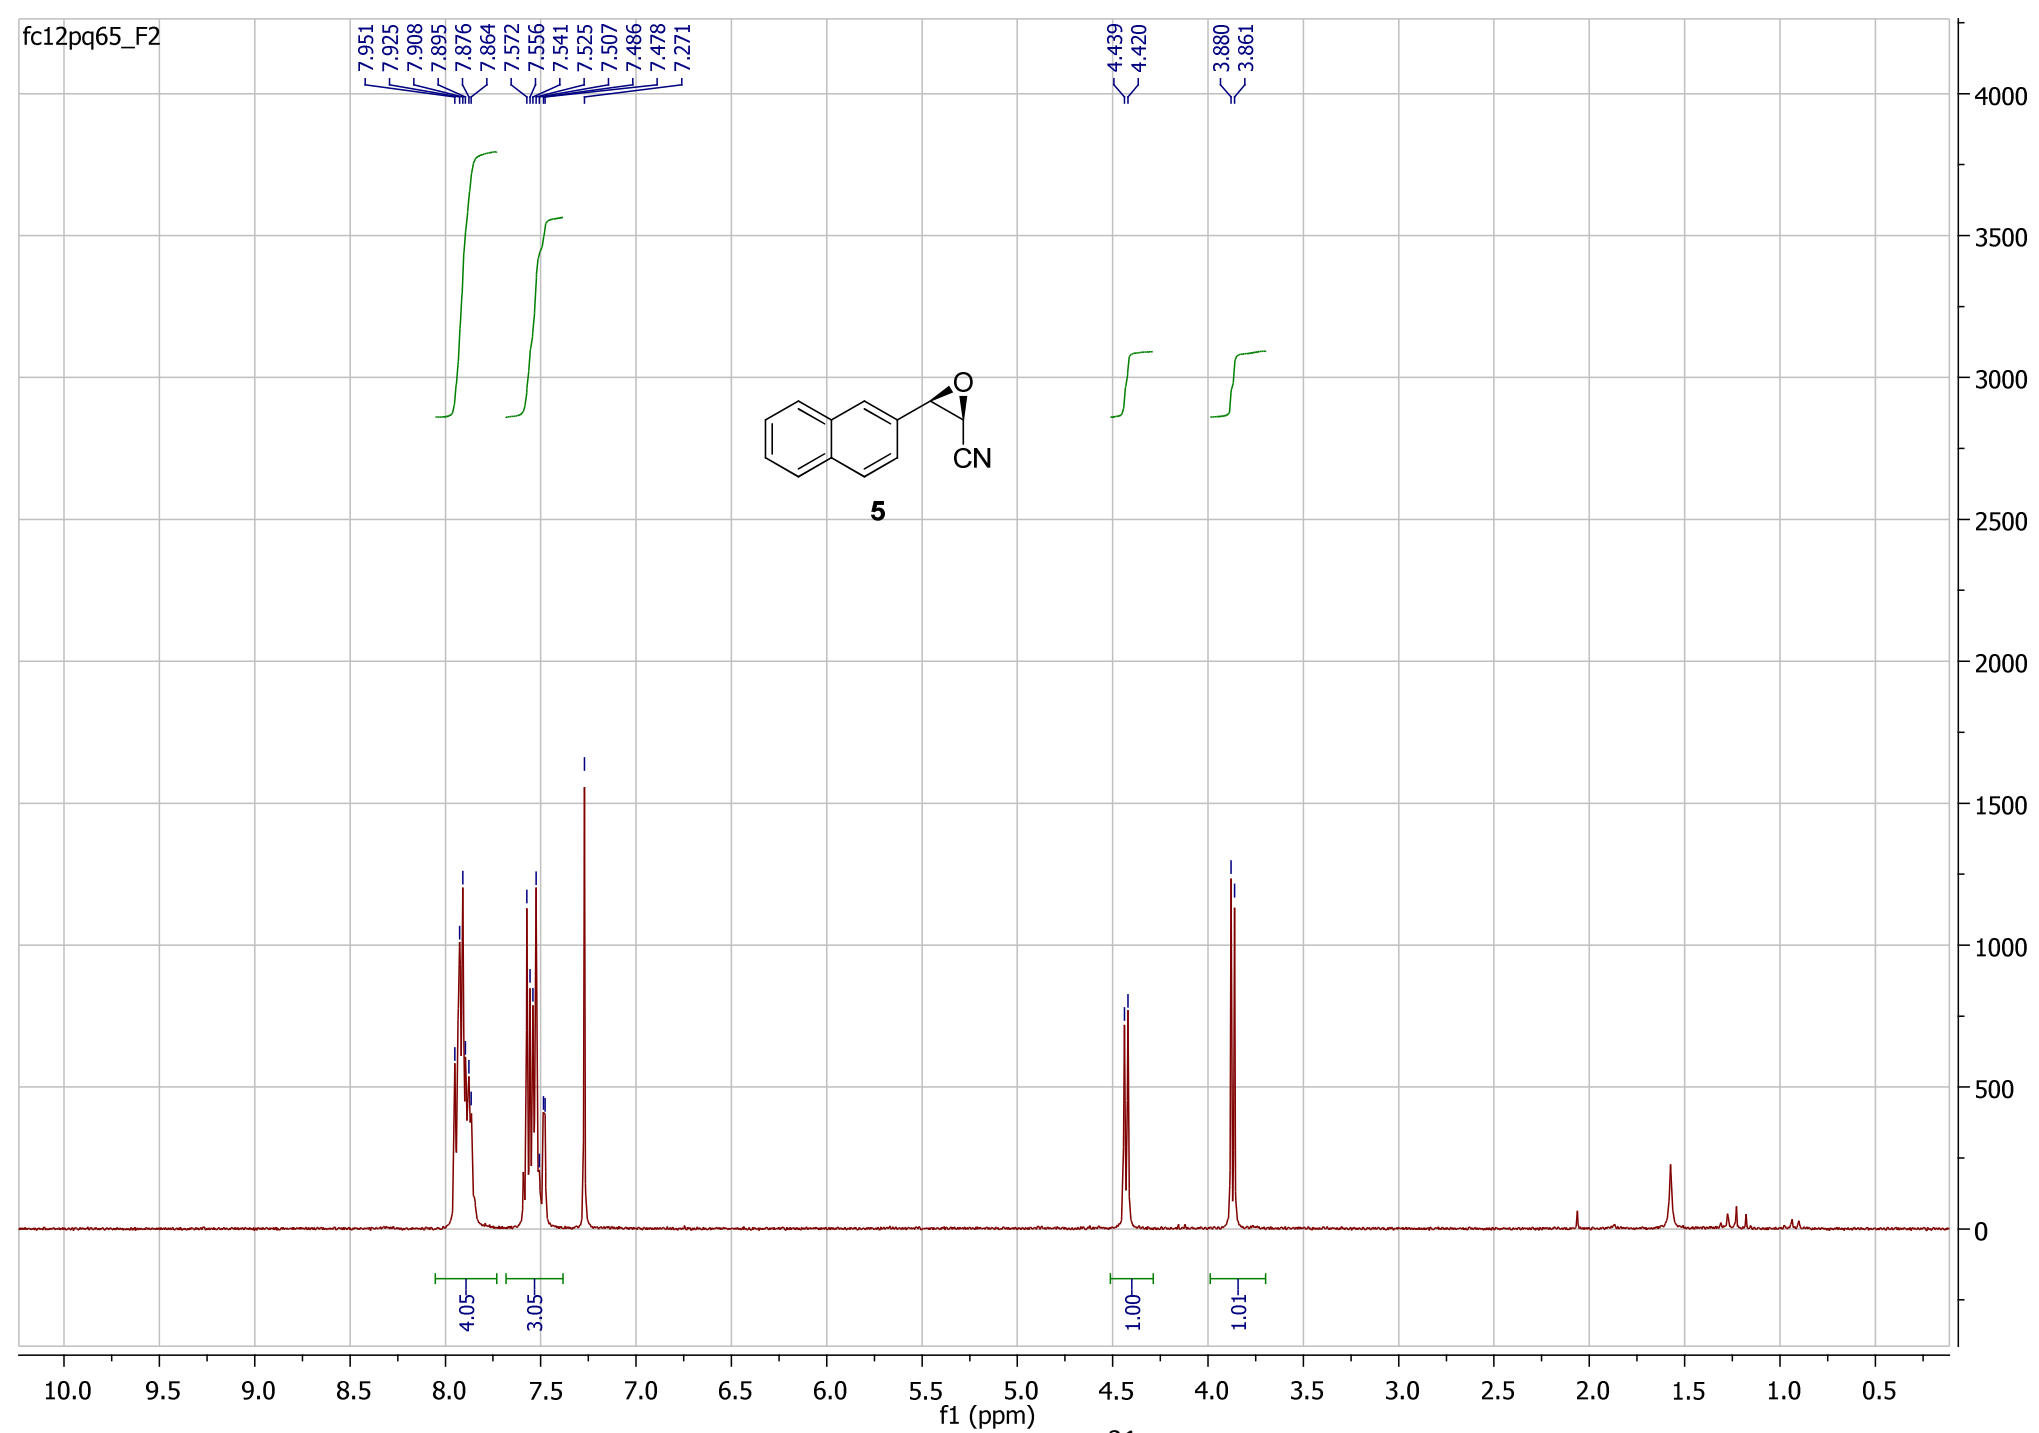

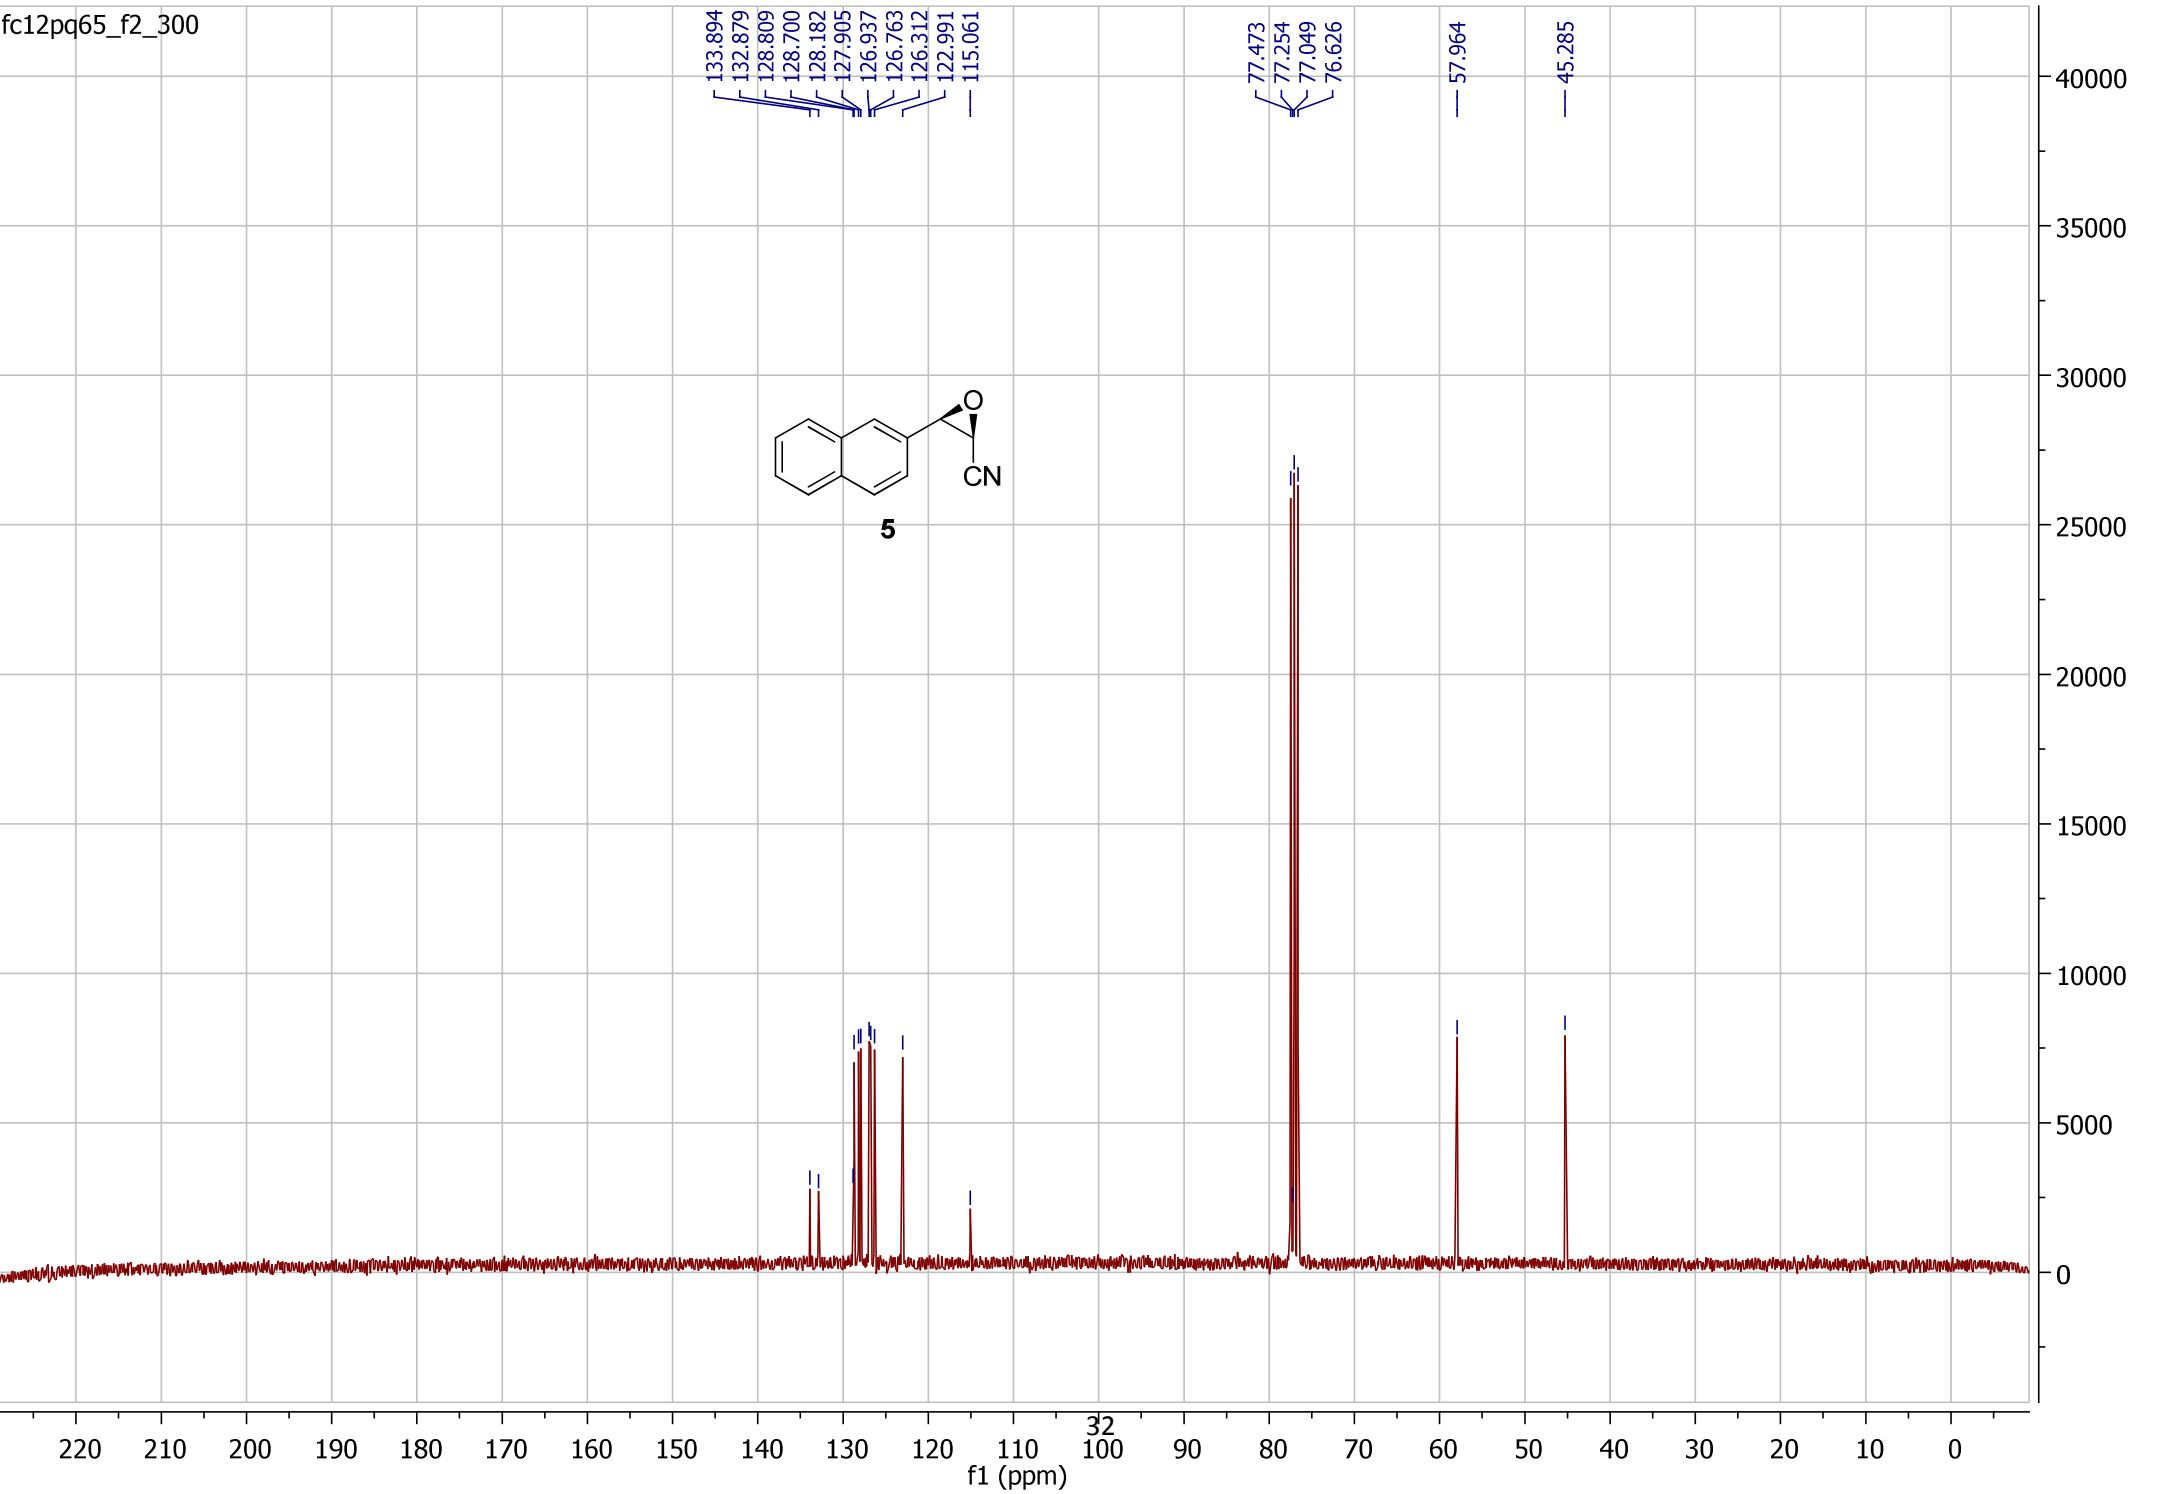



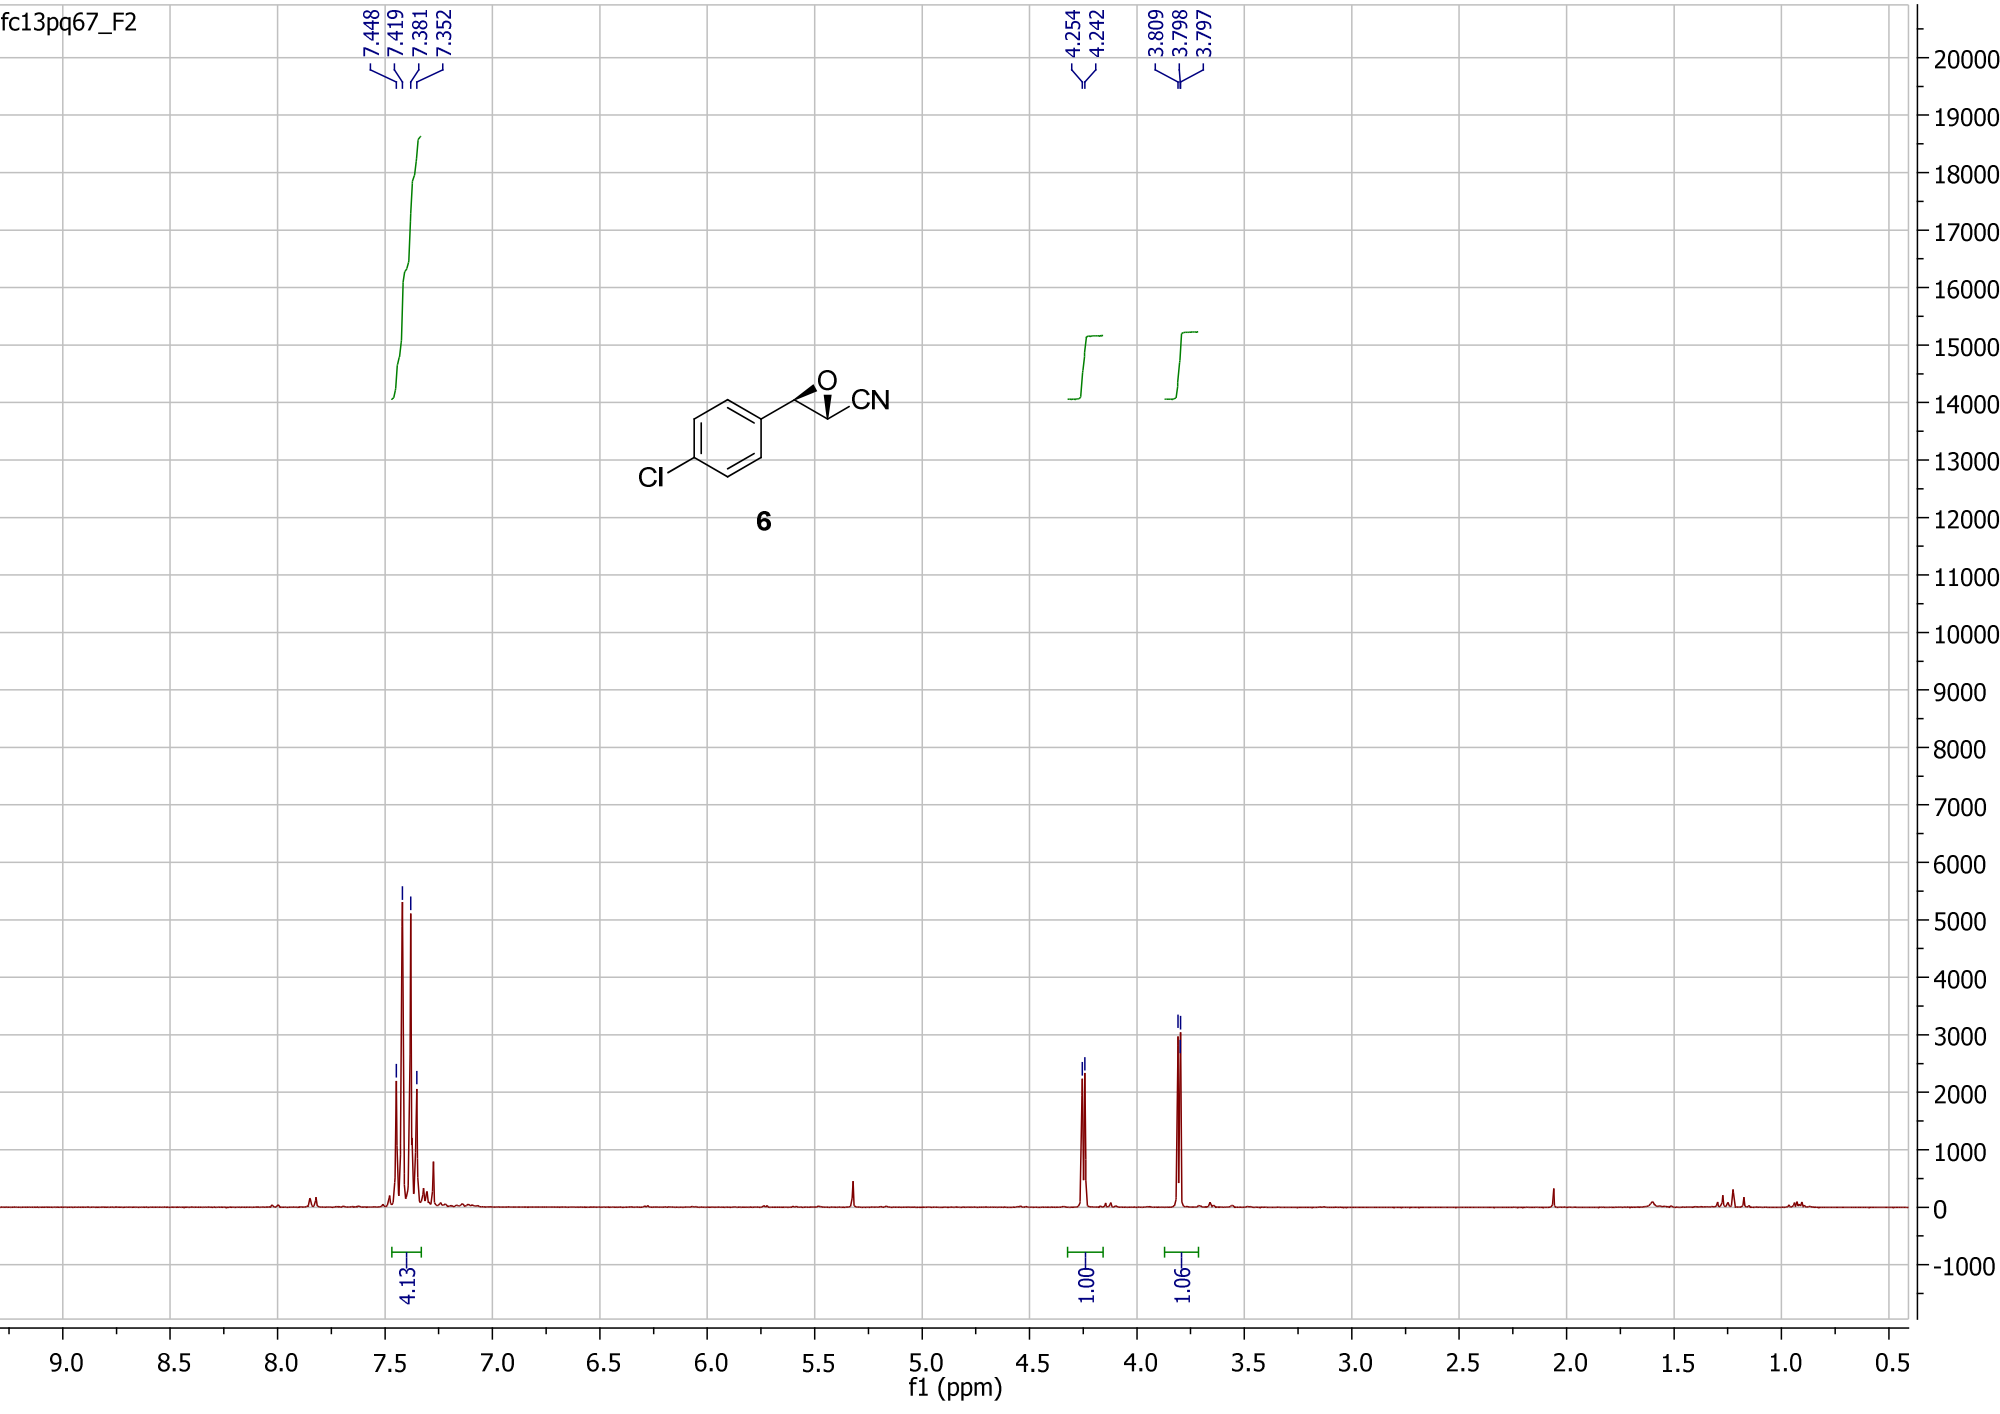

fc13pq67-f1-300

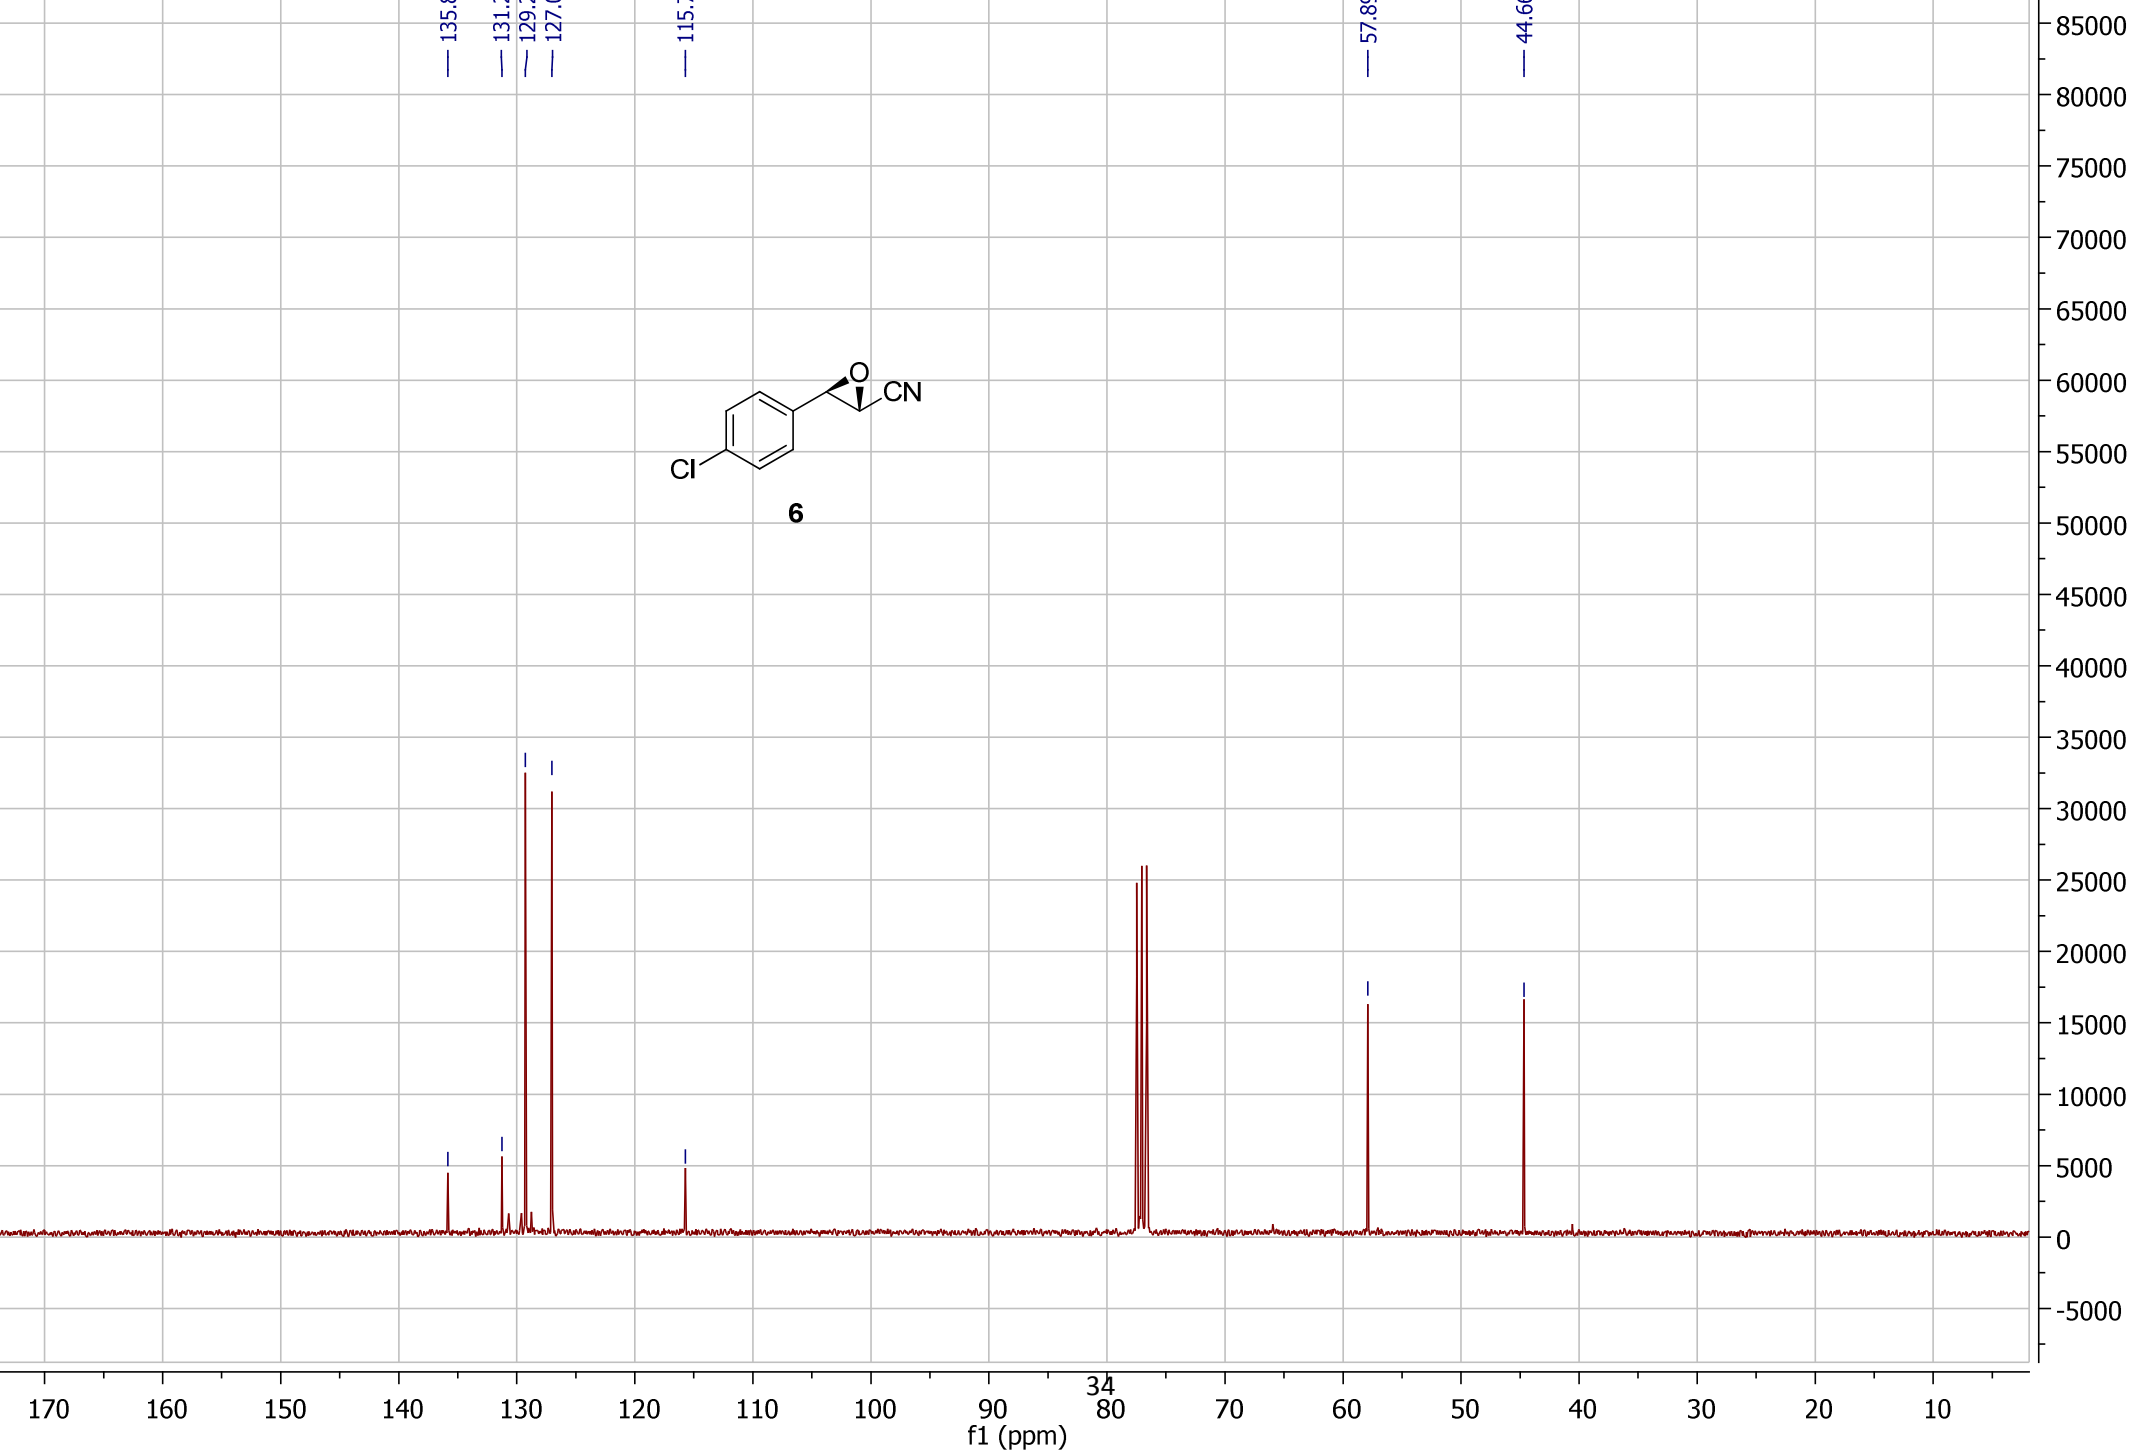

f1 (ppm)

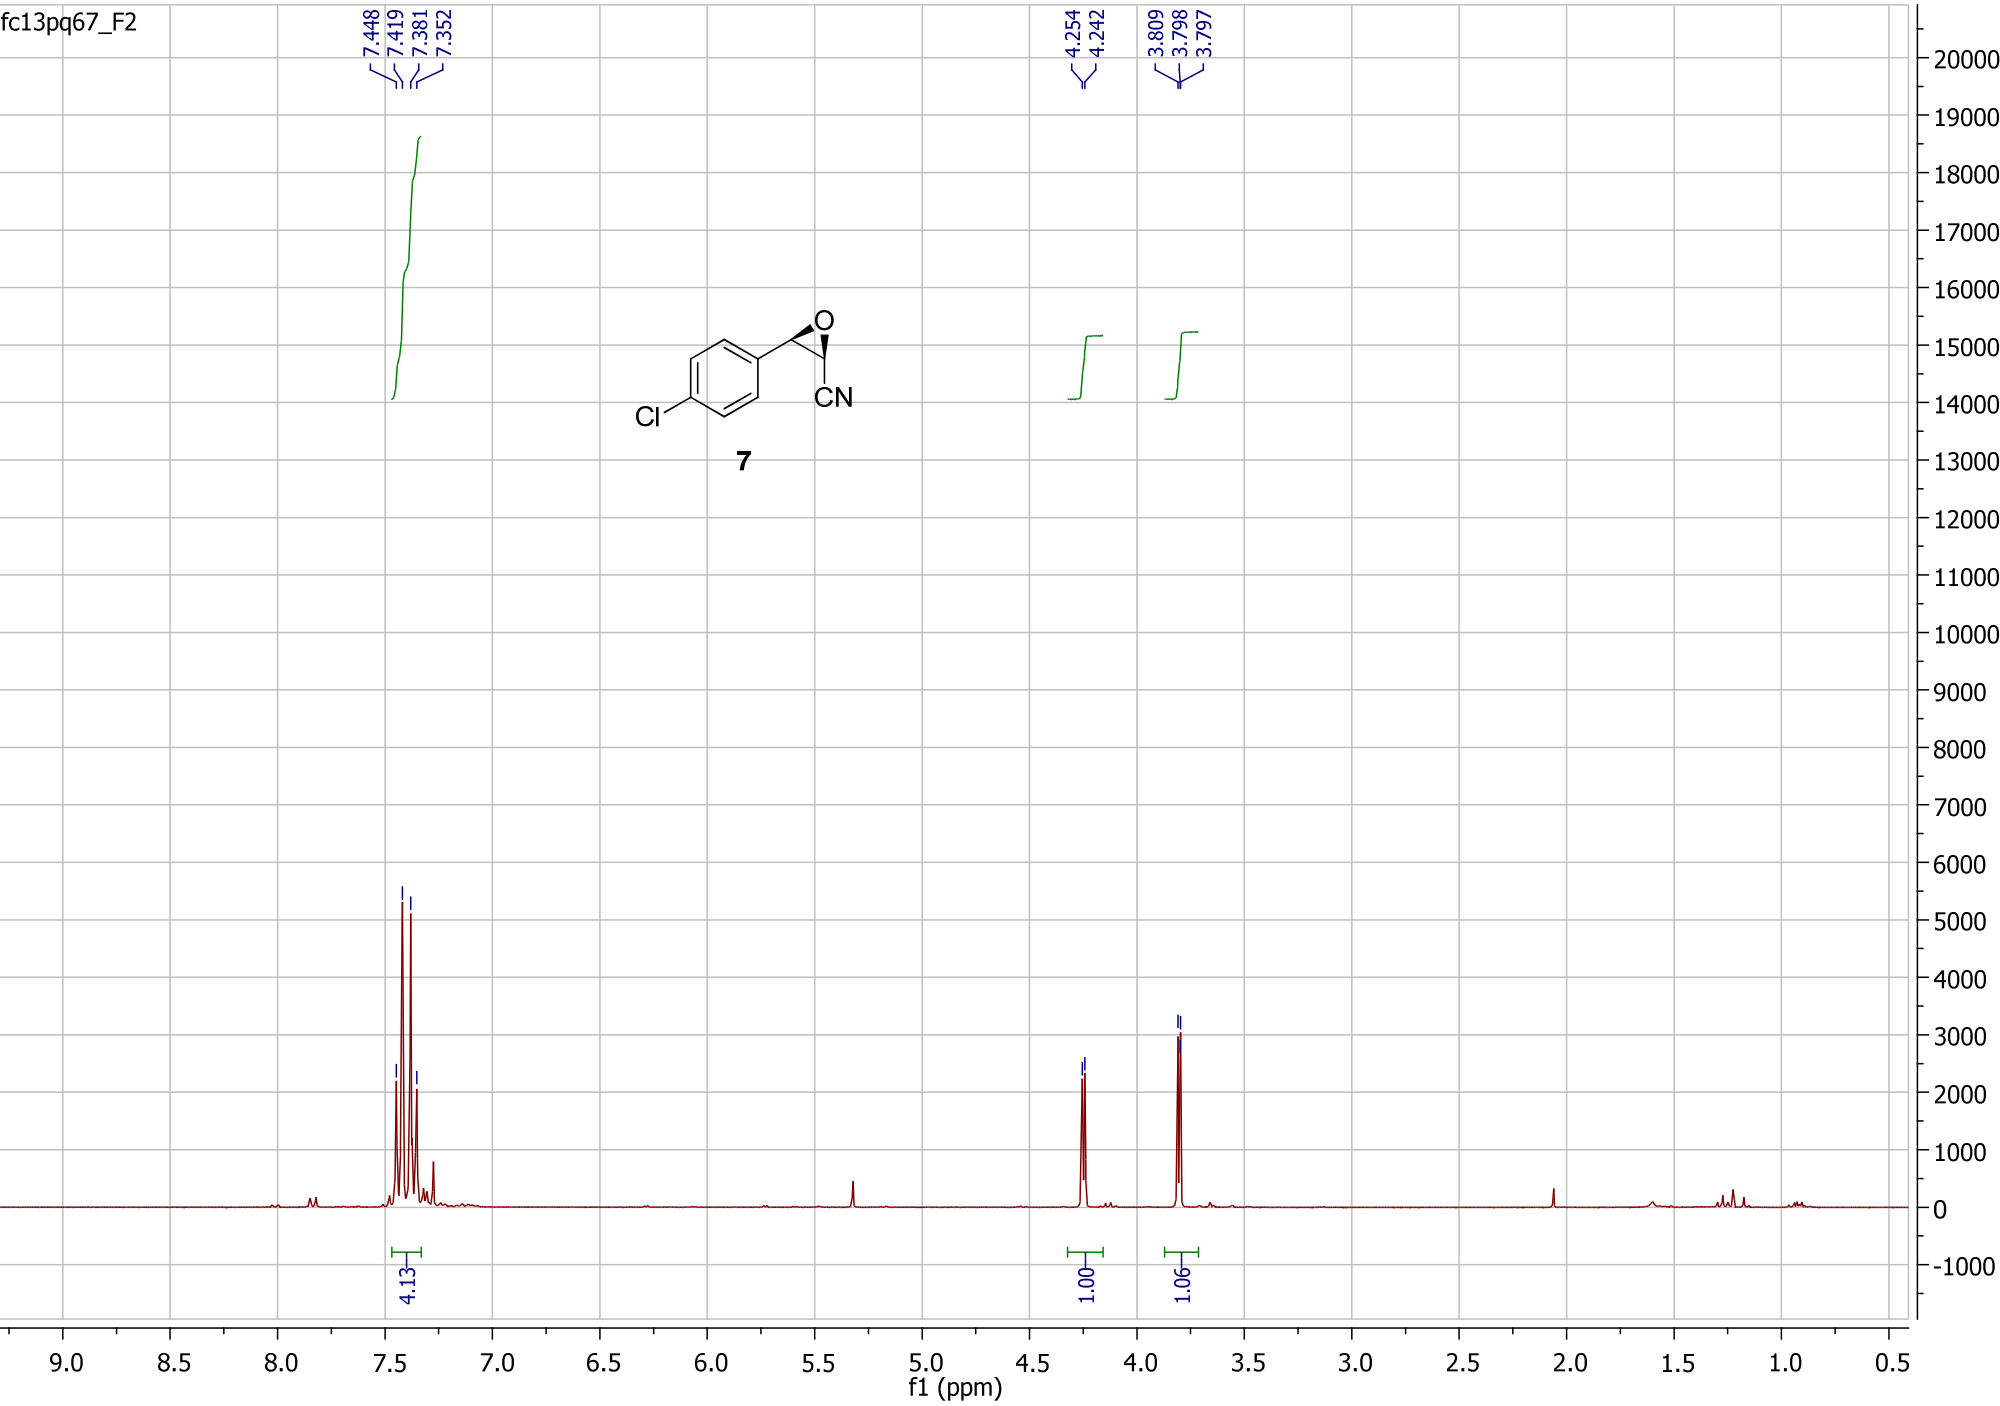

fc13pq67-f2-300

— 135.745  
— 129.964  
— 129.022  
— 127.711  
  
— 114.842  
  
— 57.143  
— 45.111

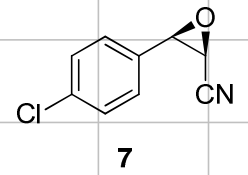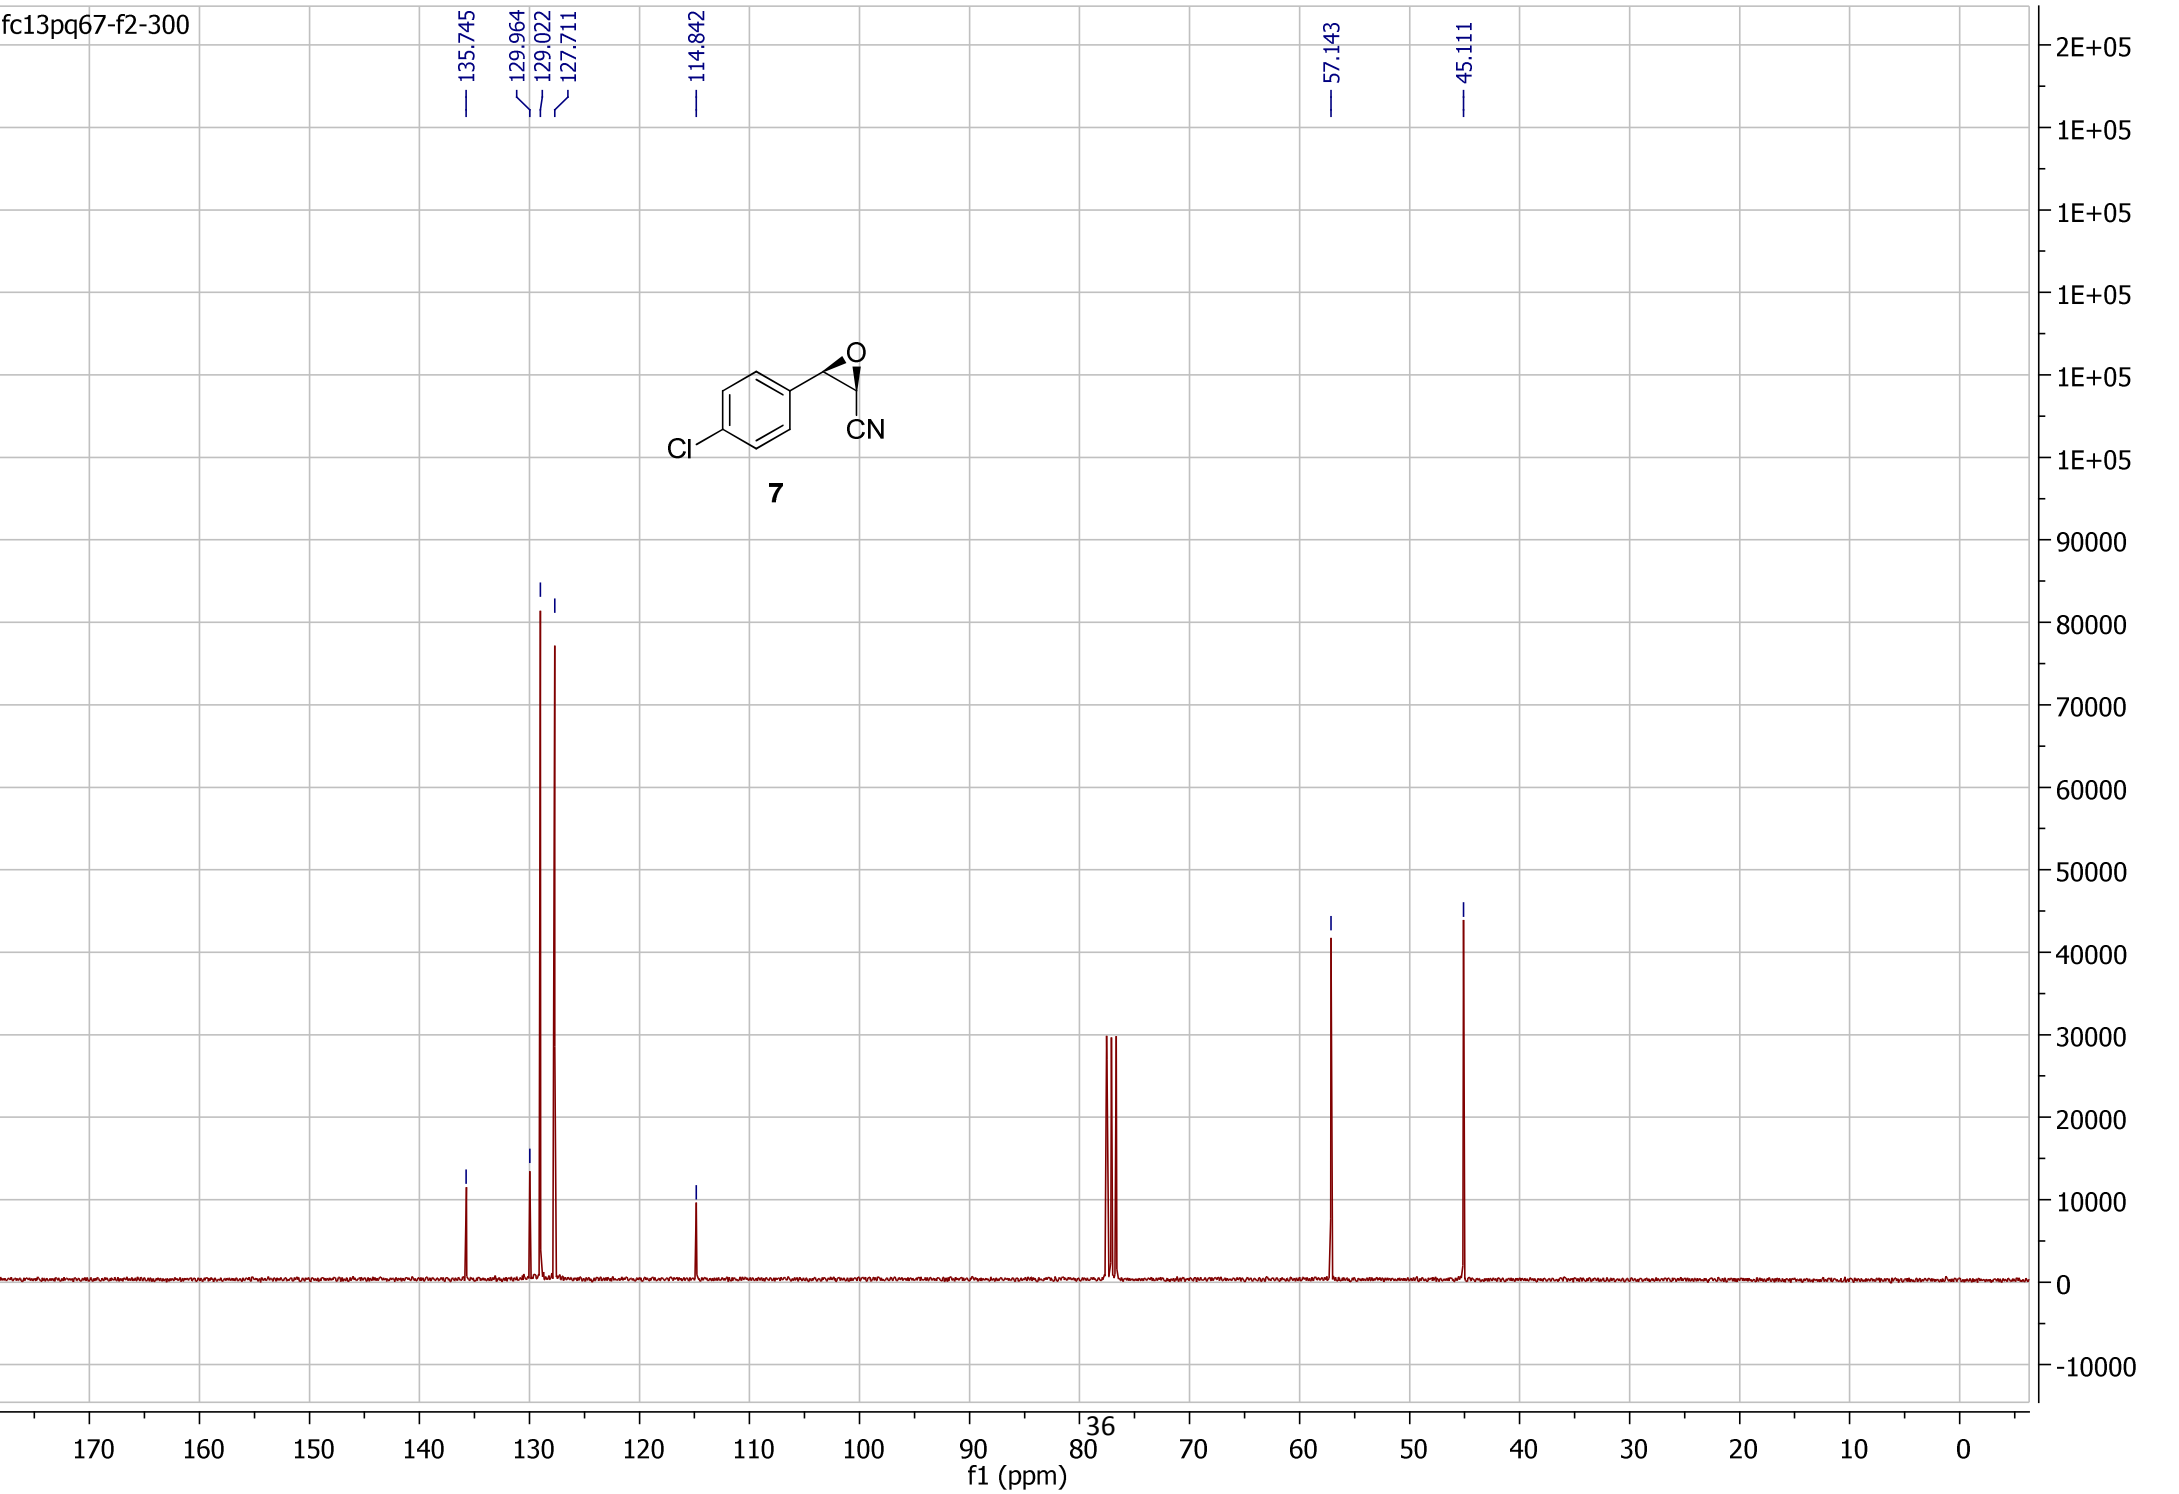

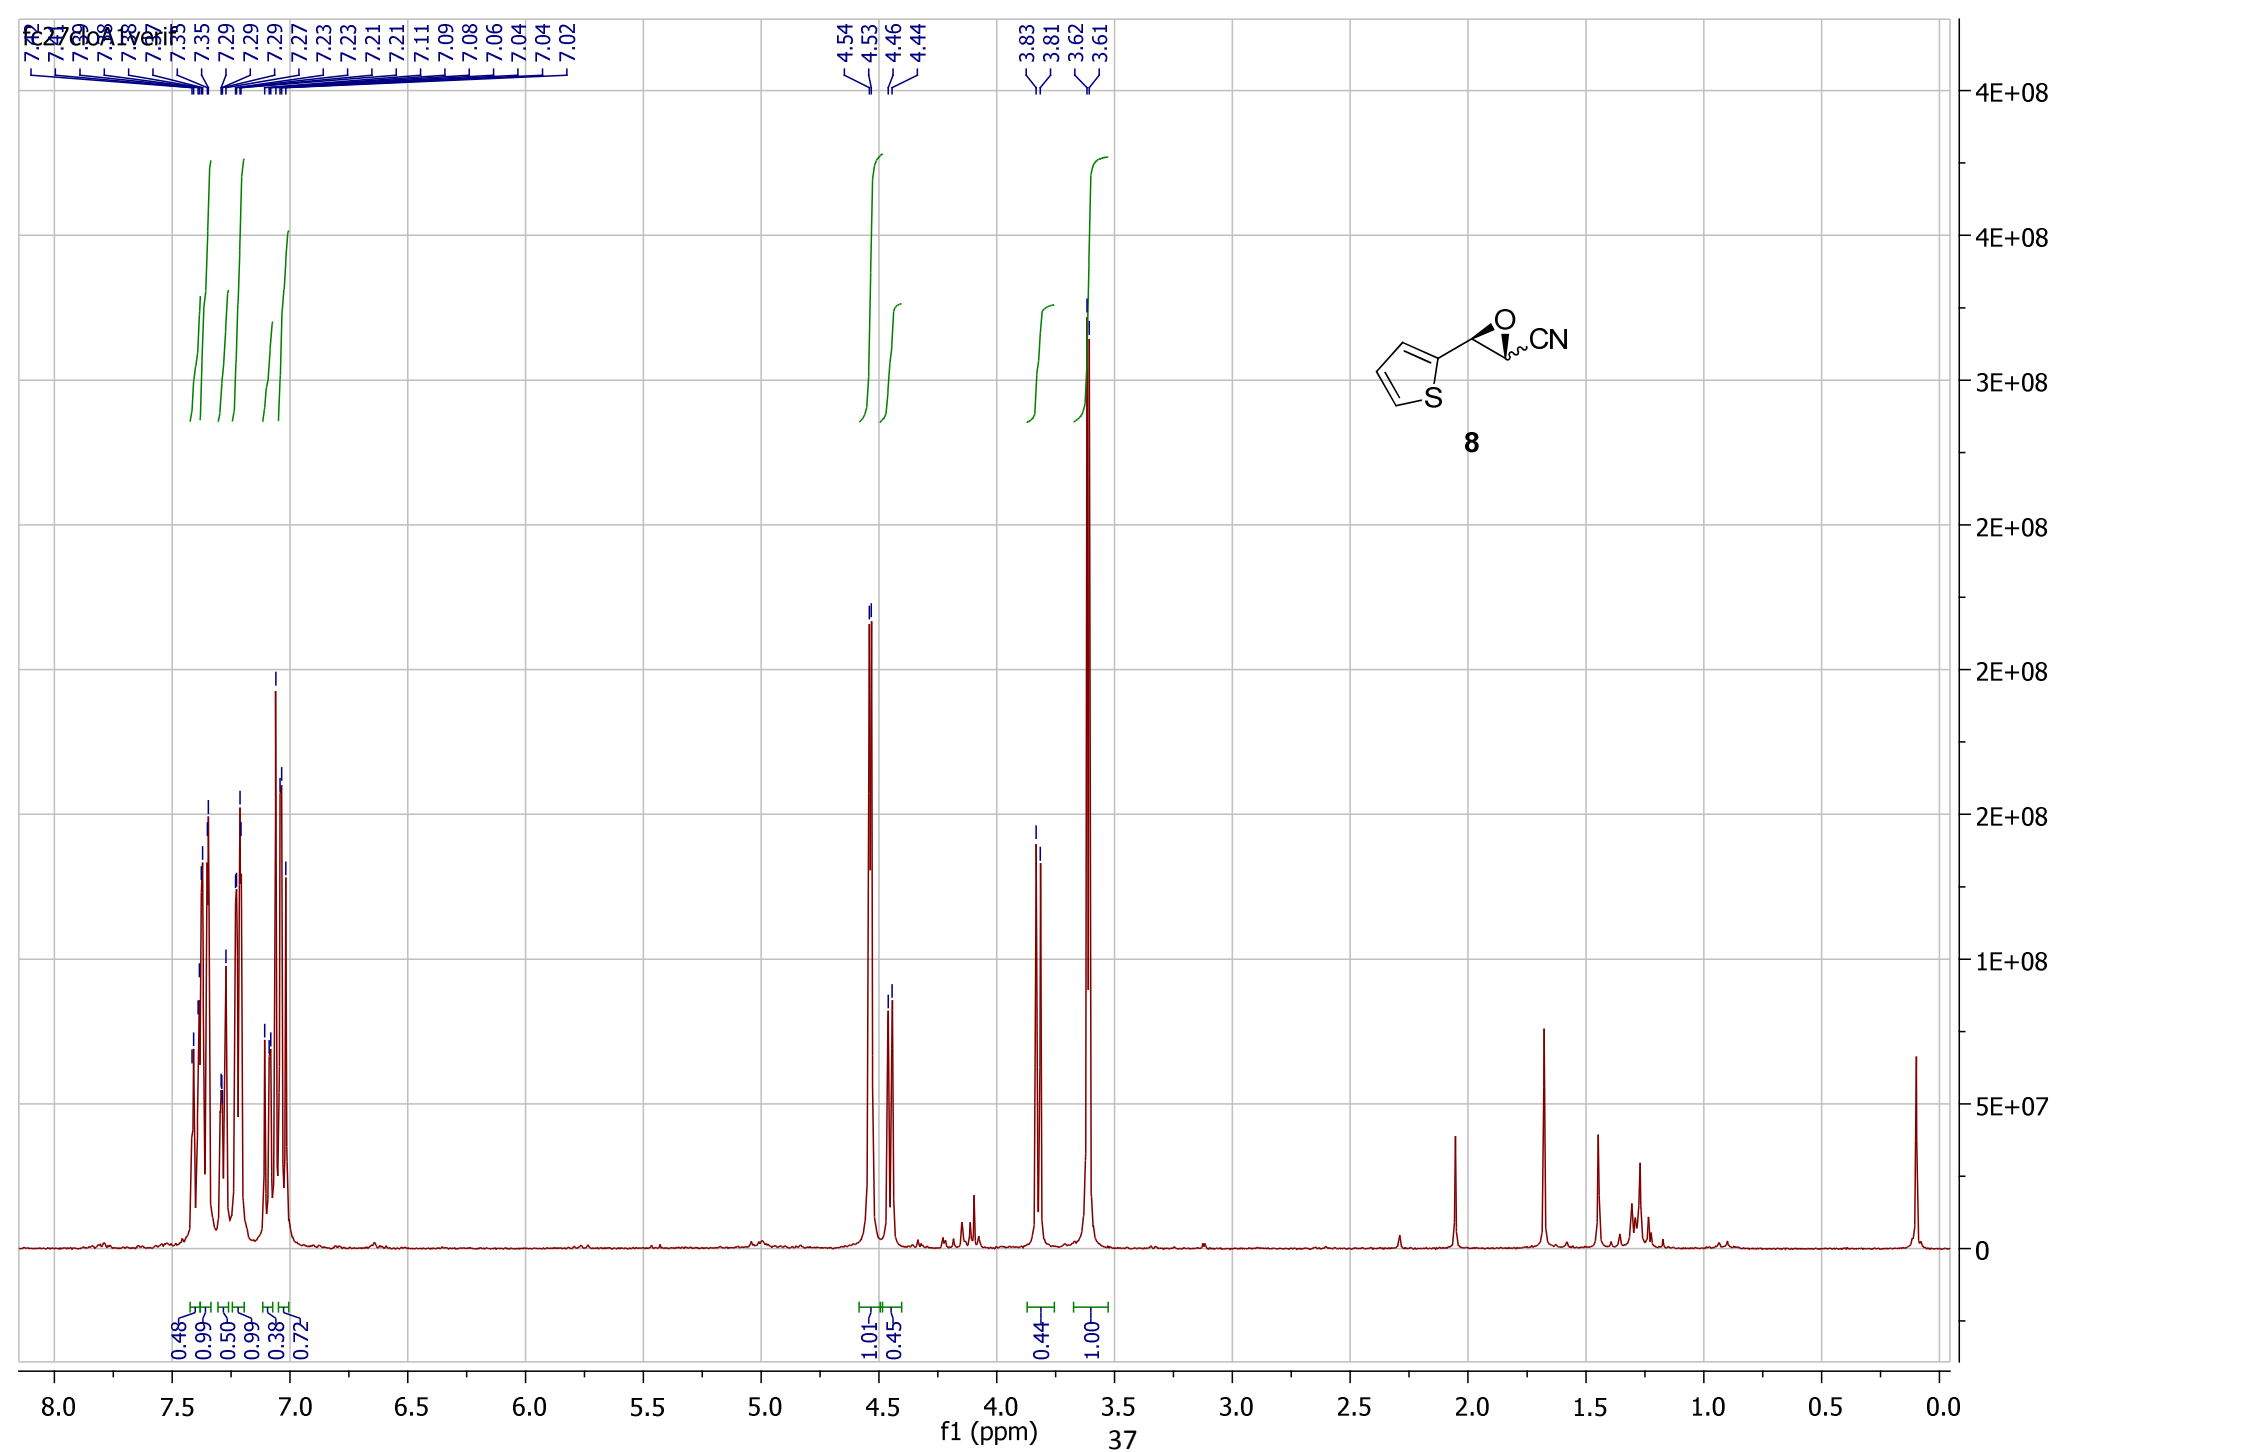

f1 (ppm)  
37

fc24cloA1

135.86  
134.20  
128.26  
127.75  
127.61  
127.45  
127.10  
127.03

115.63  
115.12

55.59  
54.89

45.82  
45.43

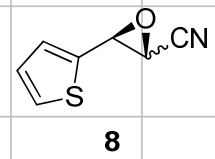

38

150 140 130 120 110 100 90 80 70 60 50 40 30 20 10 0

f1 (ppm)

6E+08  
5E+08  
4E+08  
4E+08  
3E+08  
2E+08  
2E+08  
1E+08  
0  
-5E+07

fc15cloa174-1

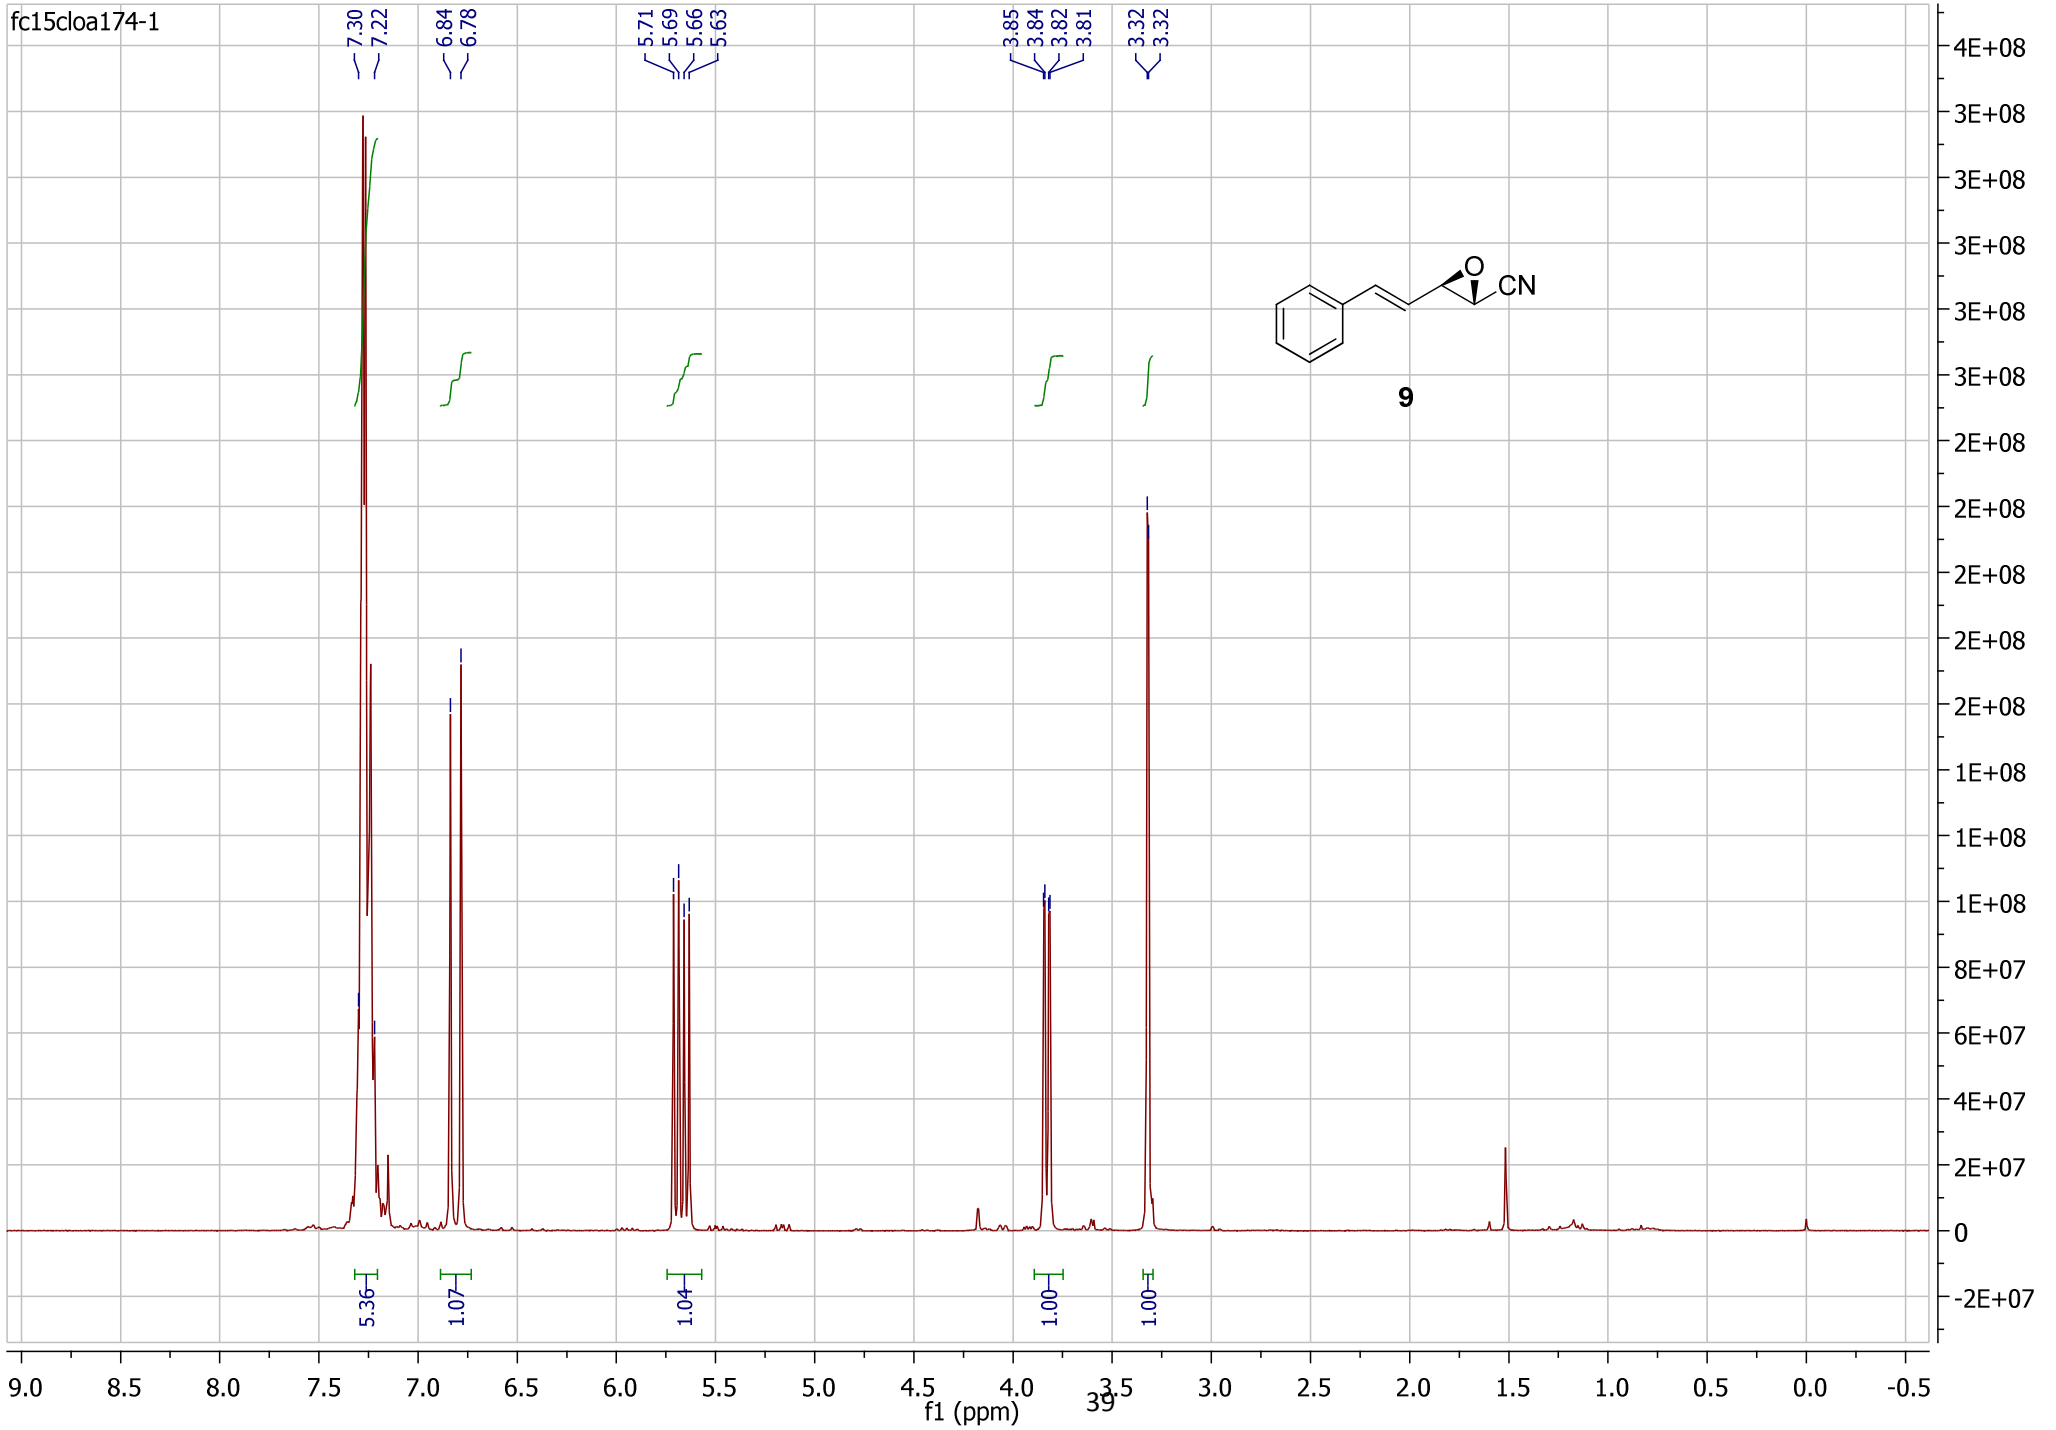

fc15cloa174-1

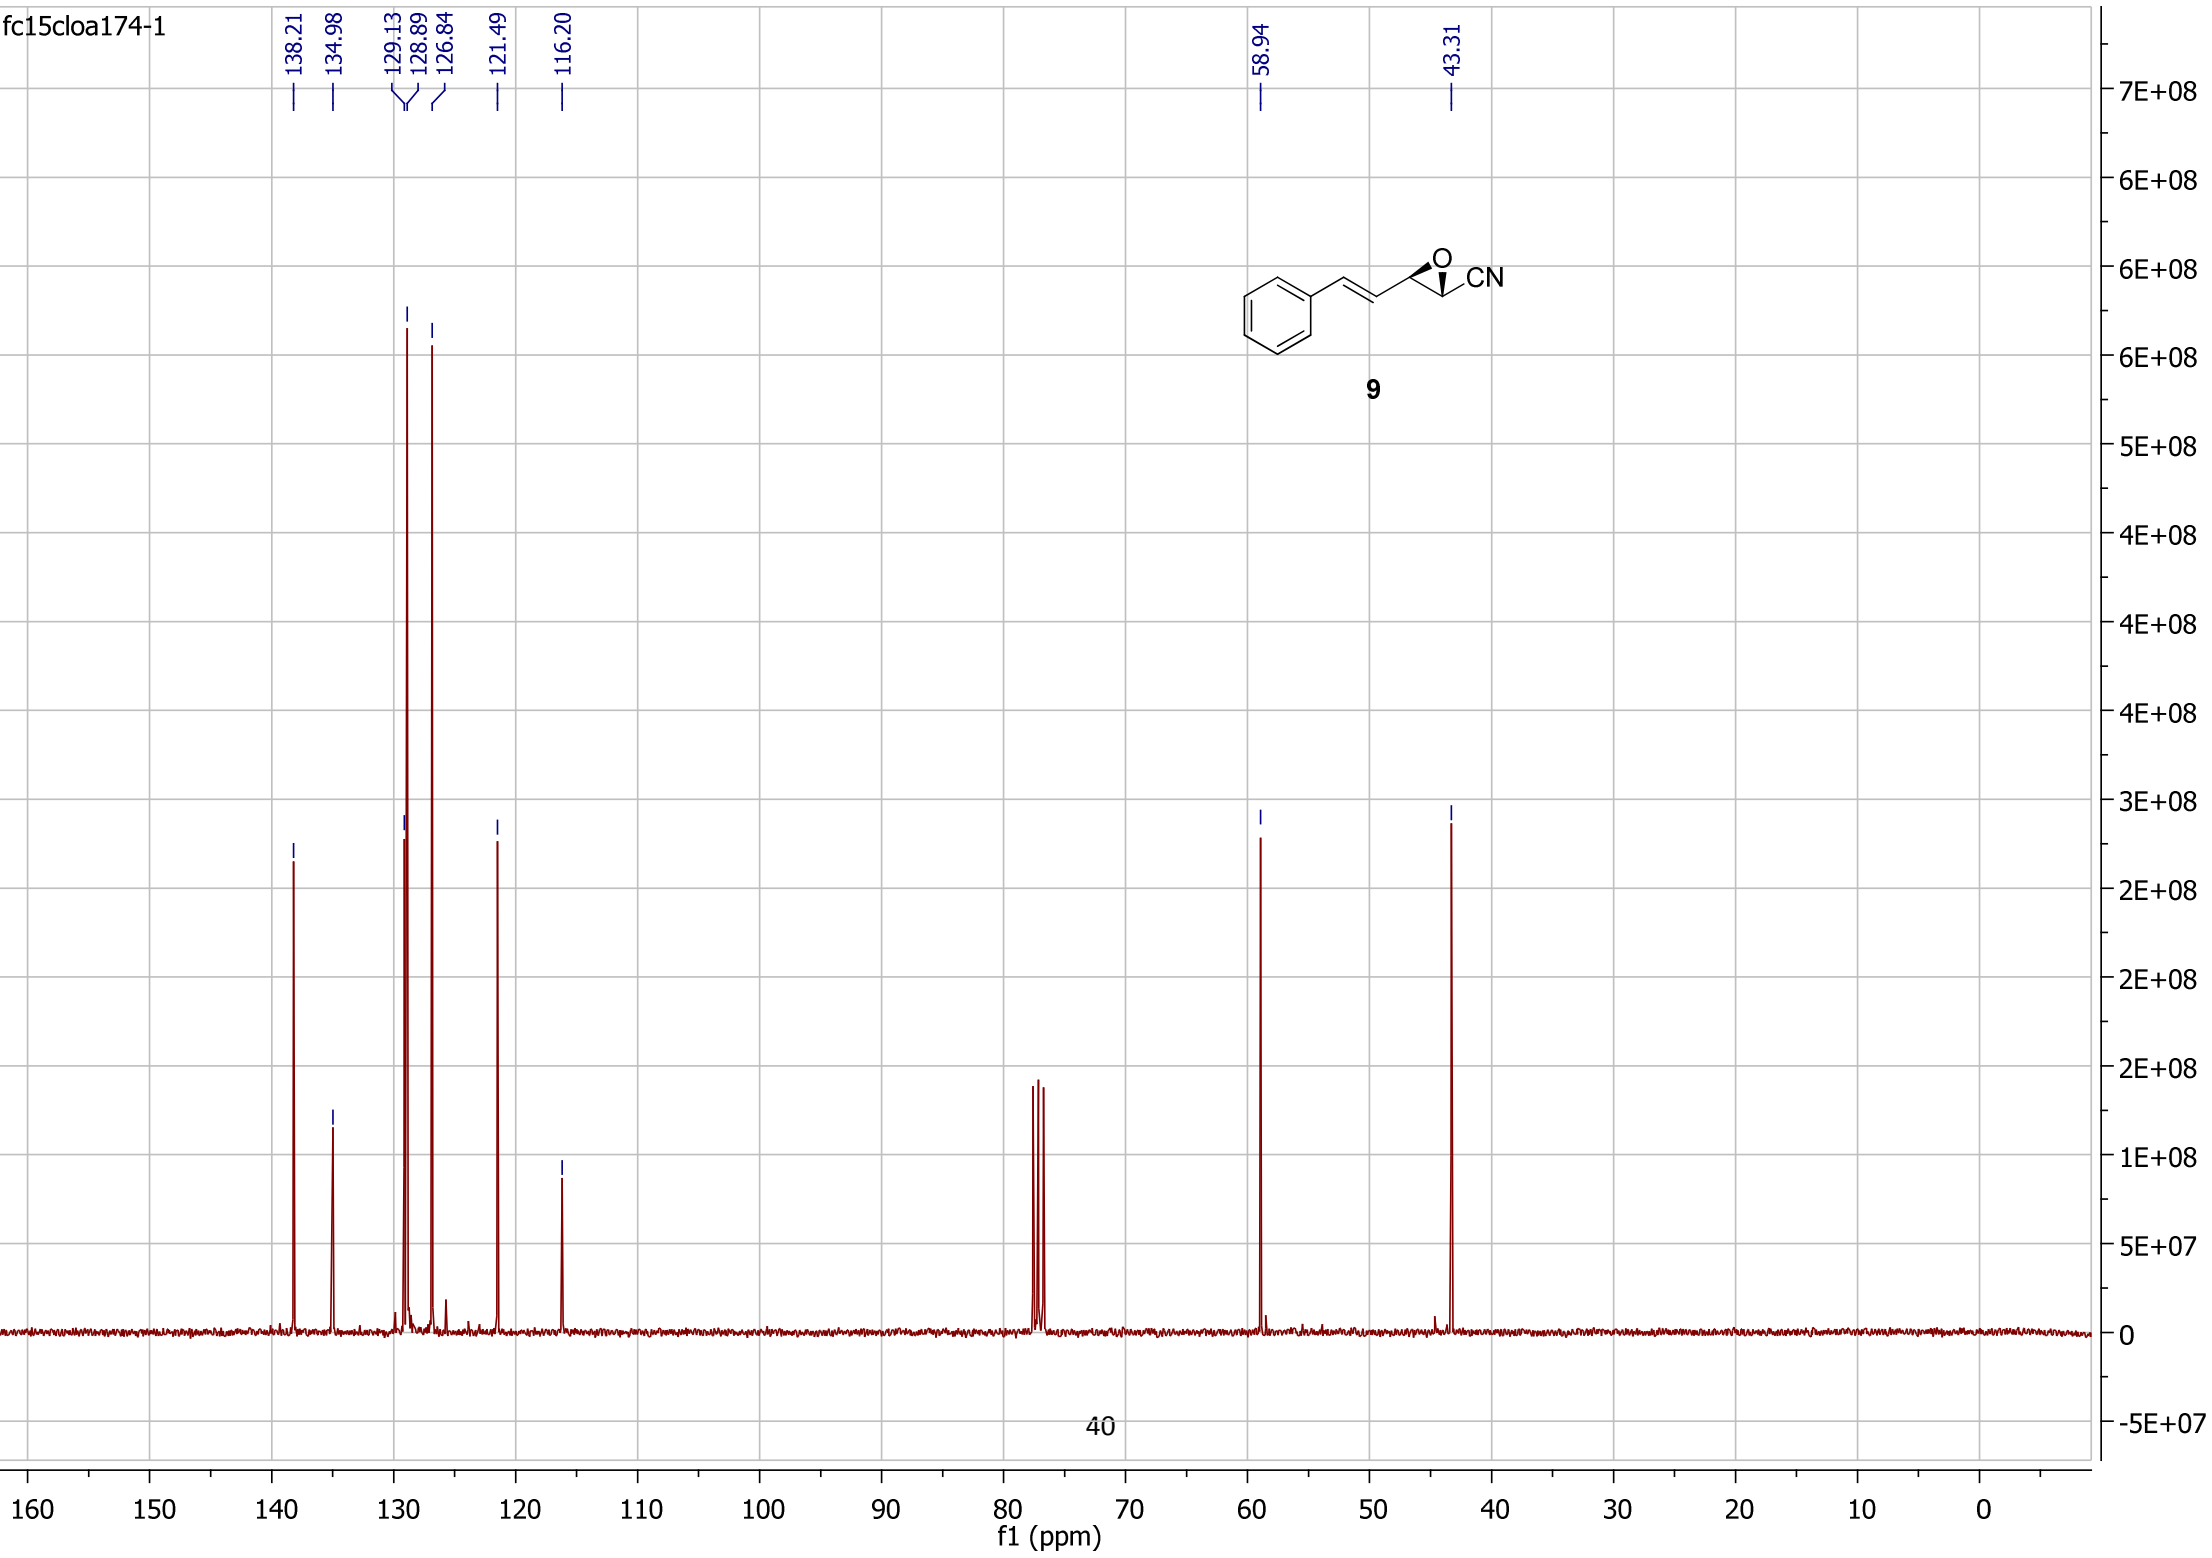

40



fc15clo174-3

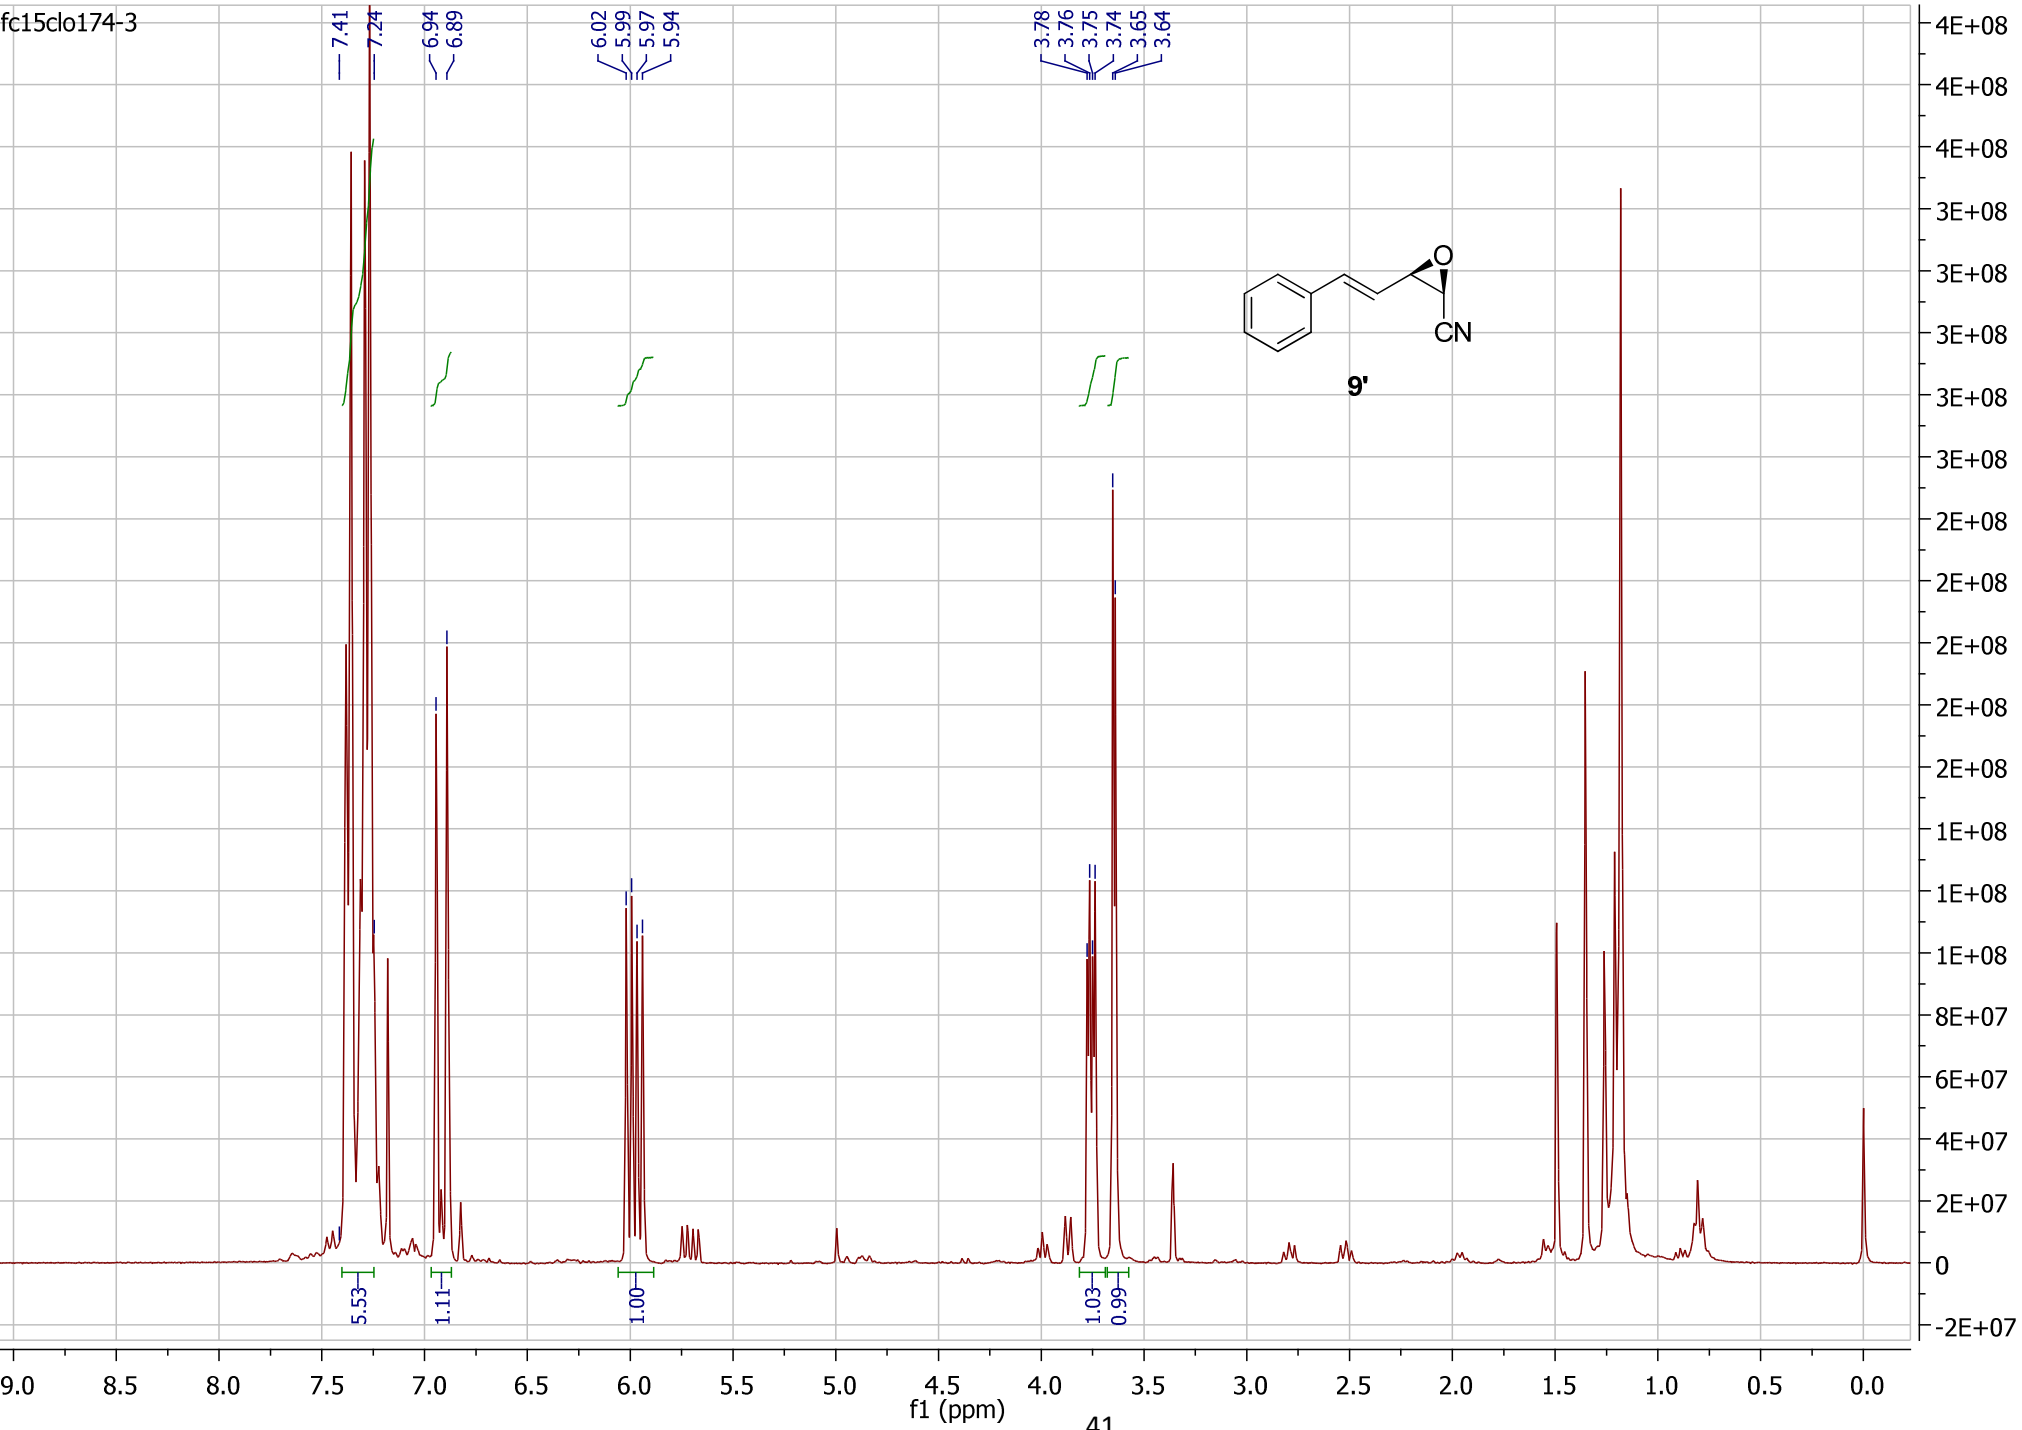

fc15clo174-3

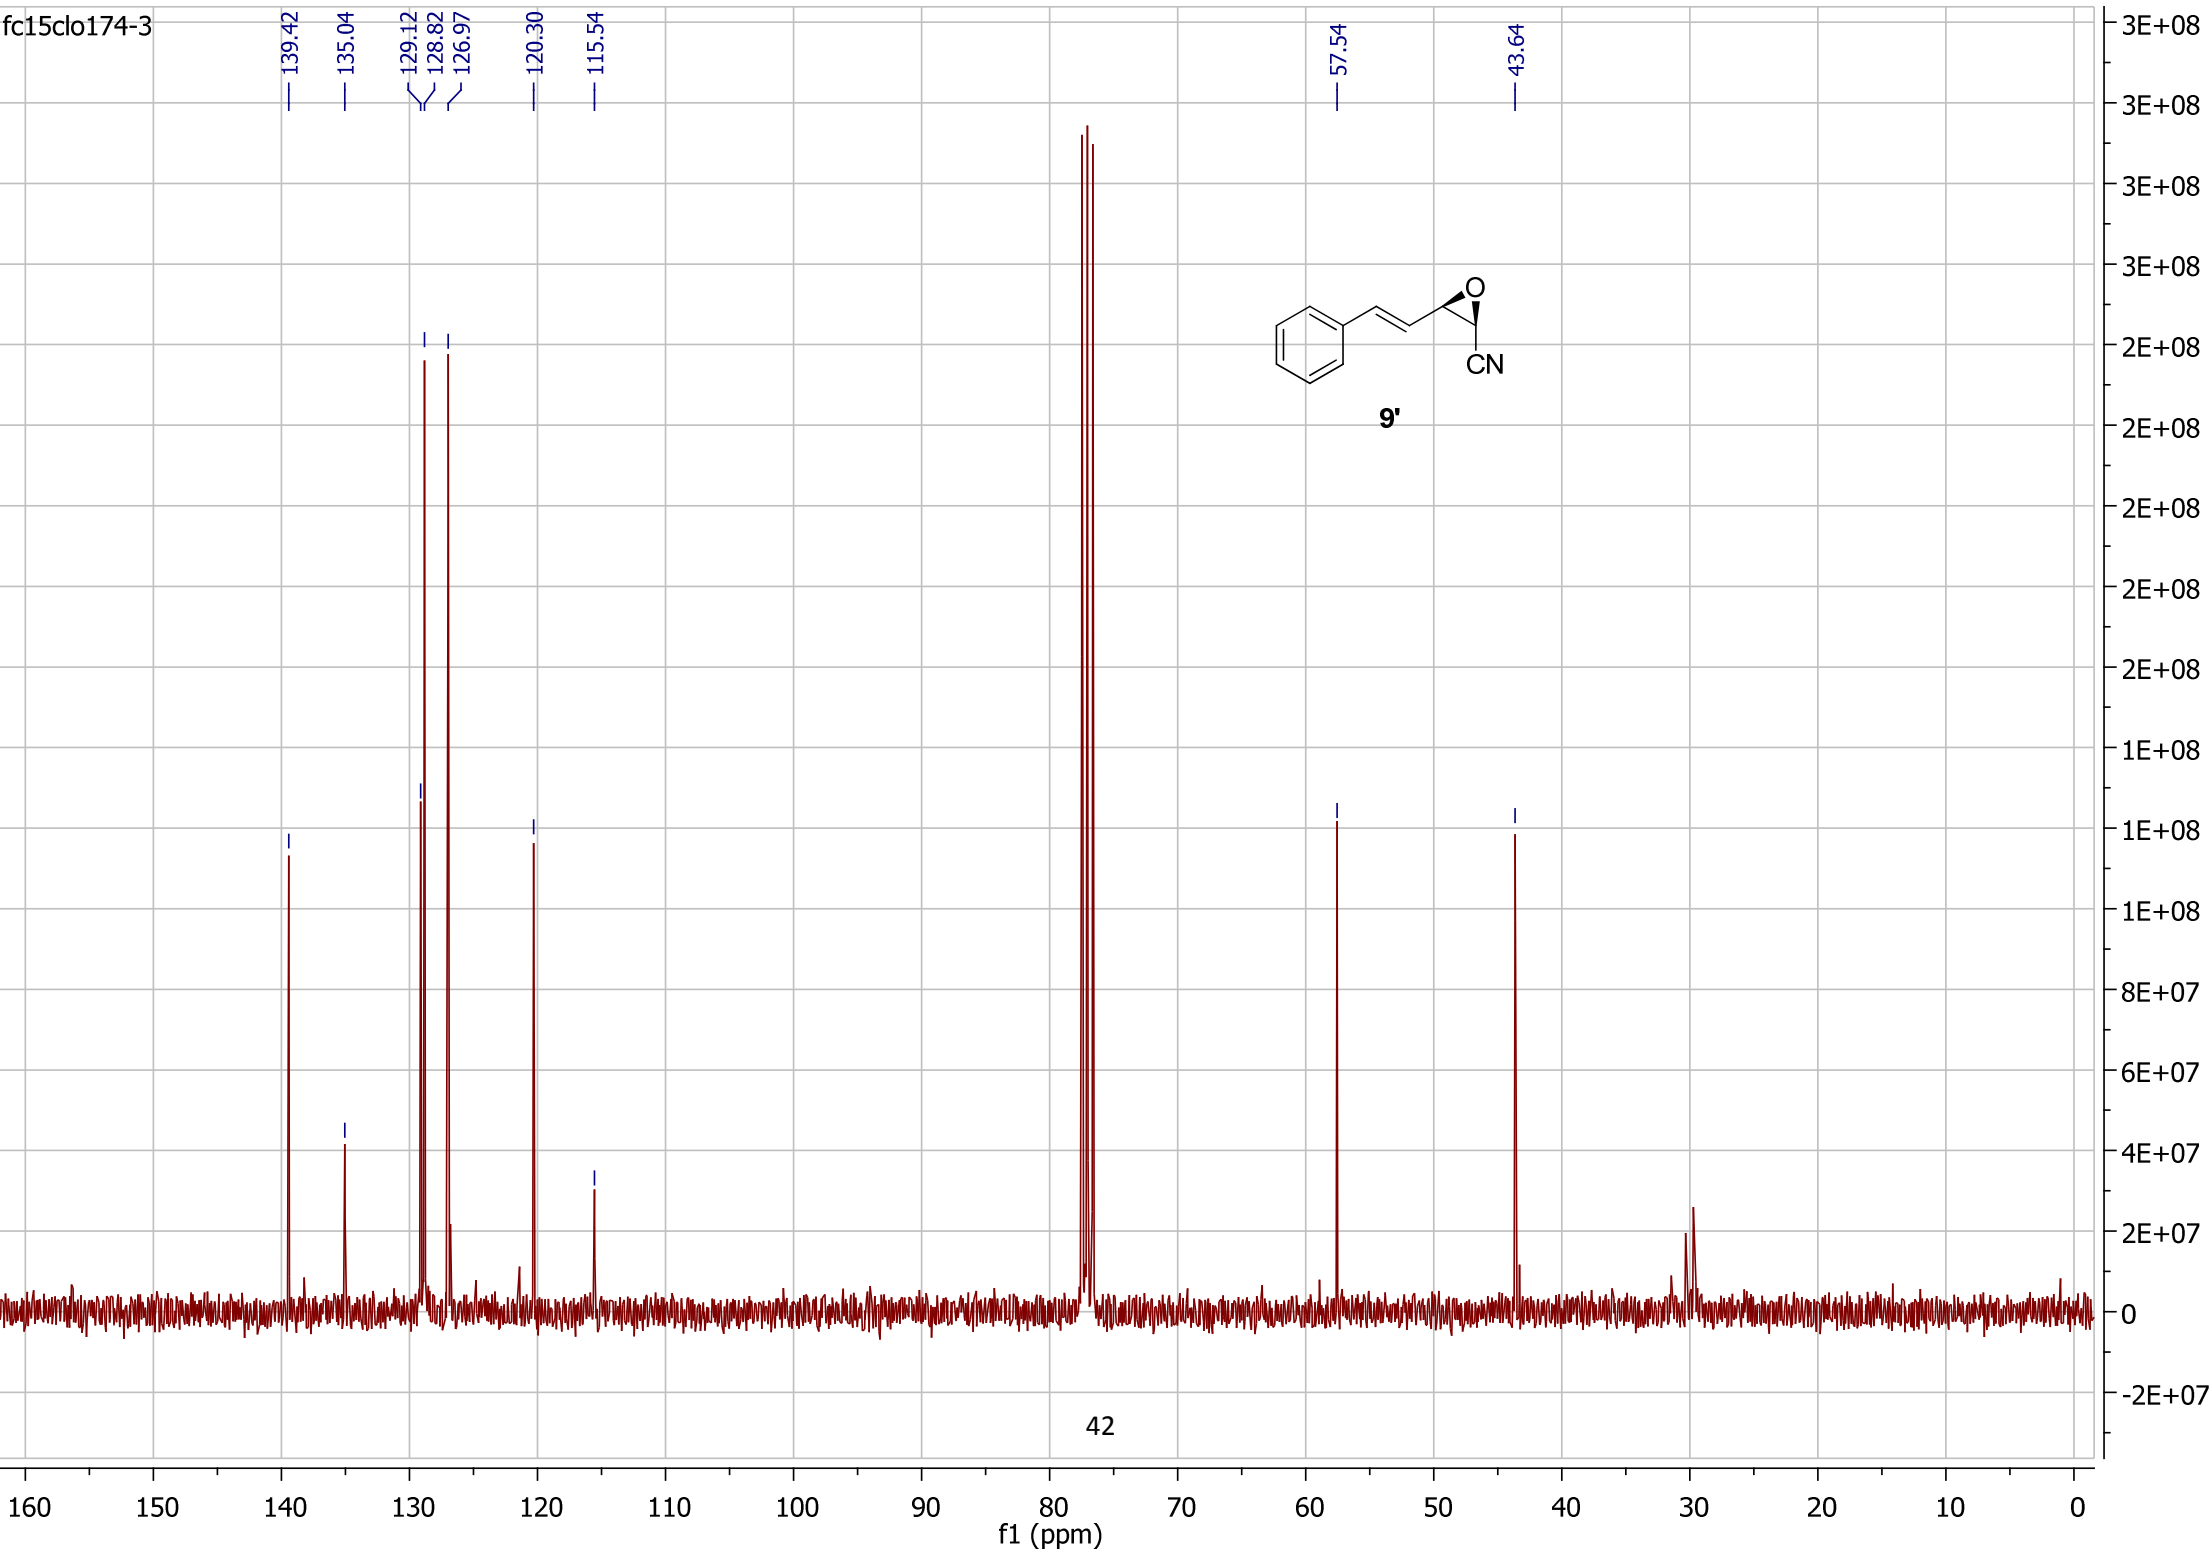

42

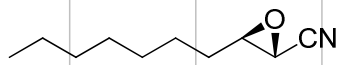

11

3.36  
3.35  
3.34  
3.33  
3.32  
3.31  
3.17  
3.17

1.71

1.12

0.91

0.89

0.86

0.85

0.82

12.80

3.11

f1 (ppm)

43

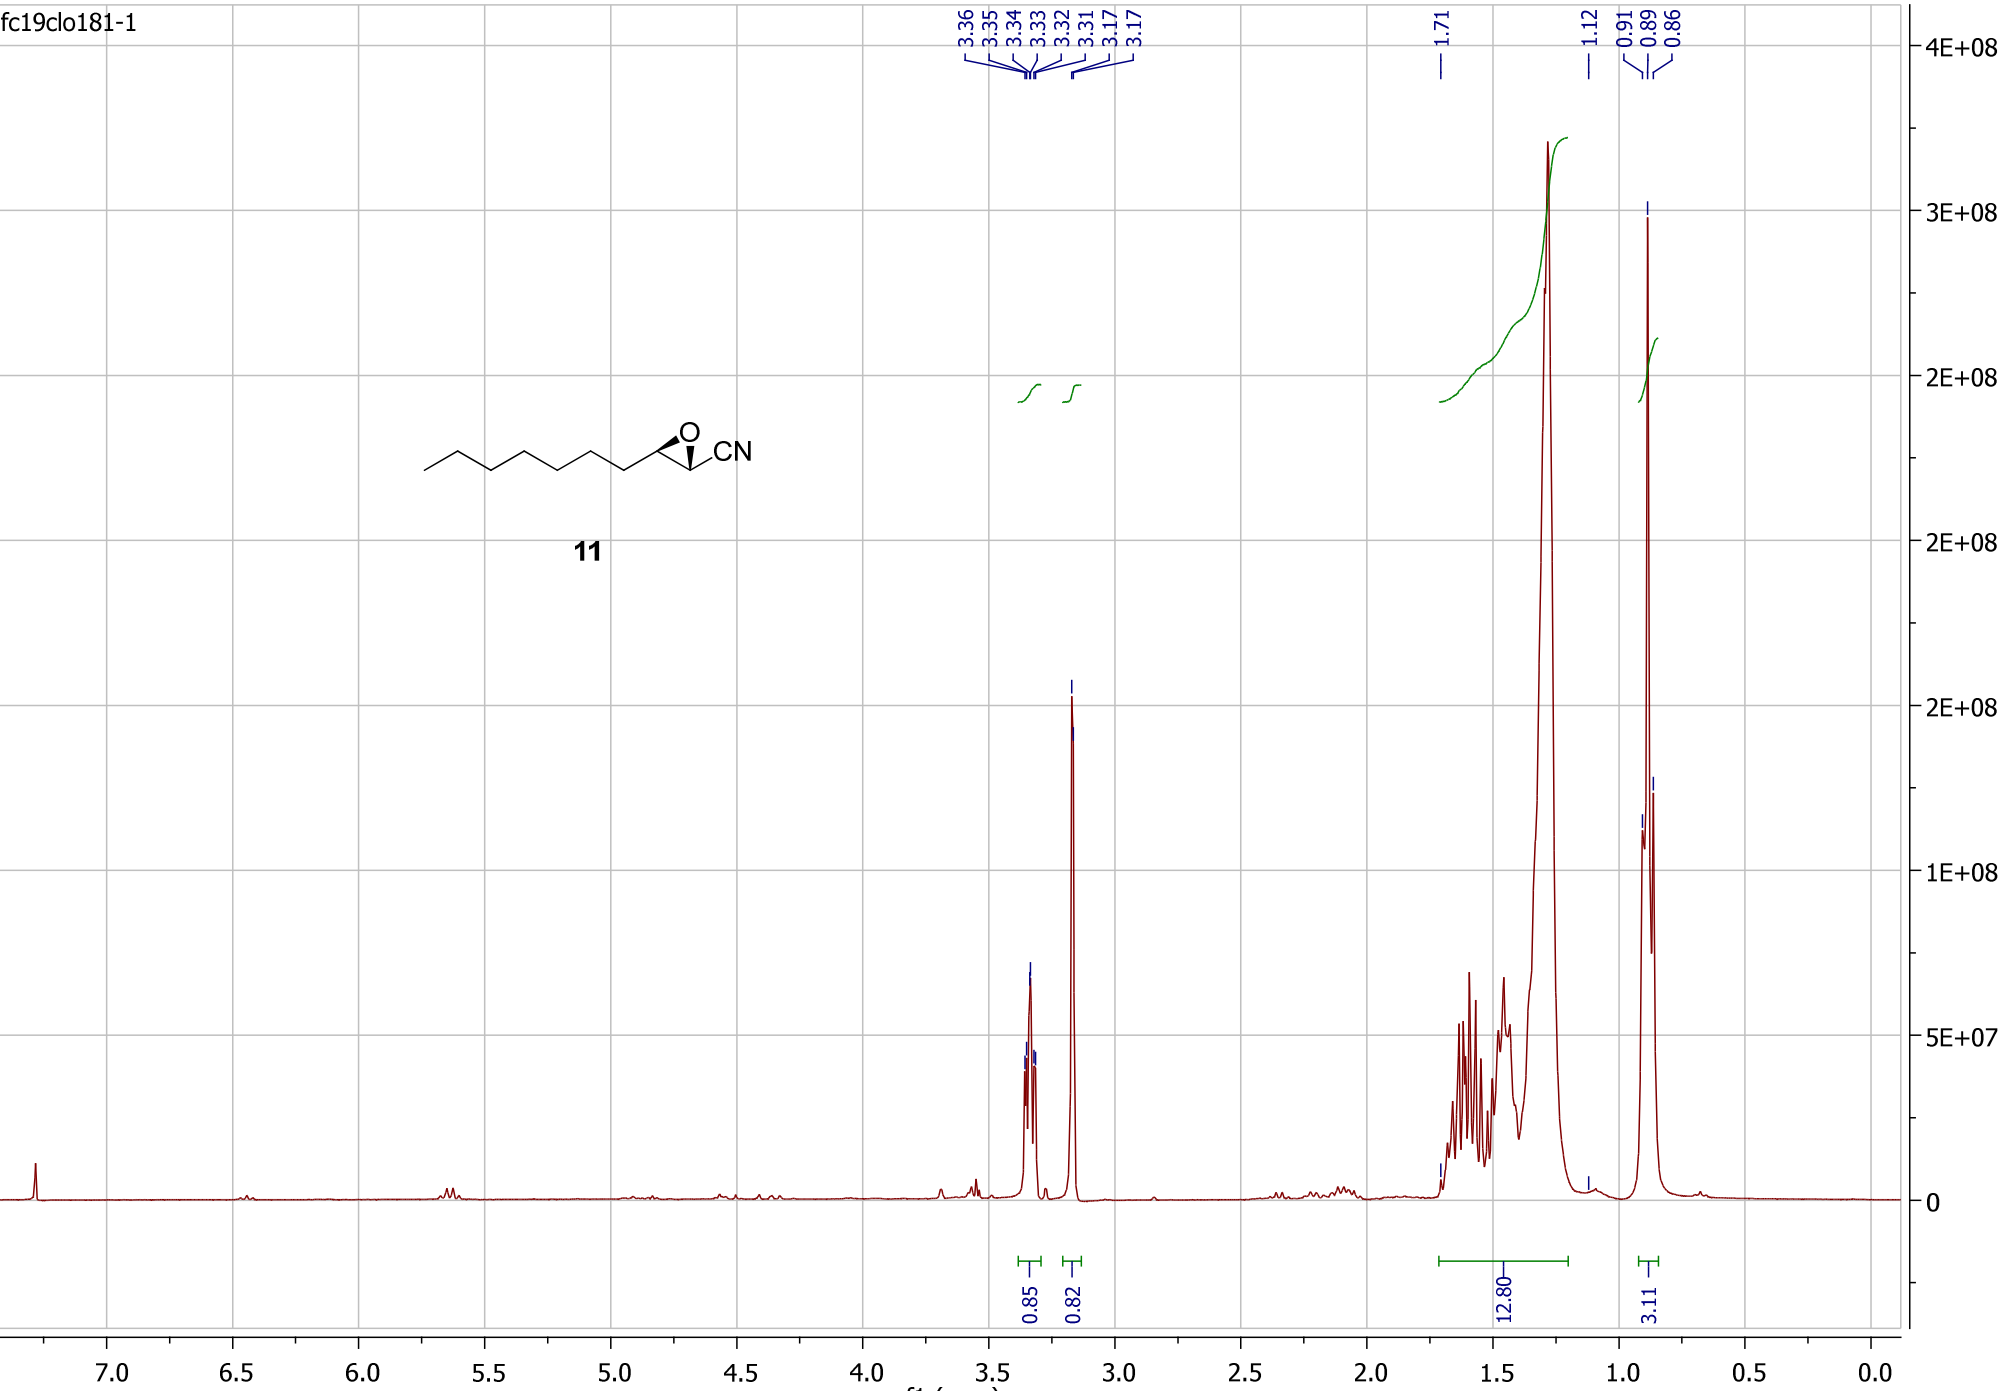

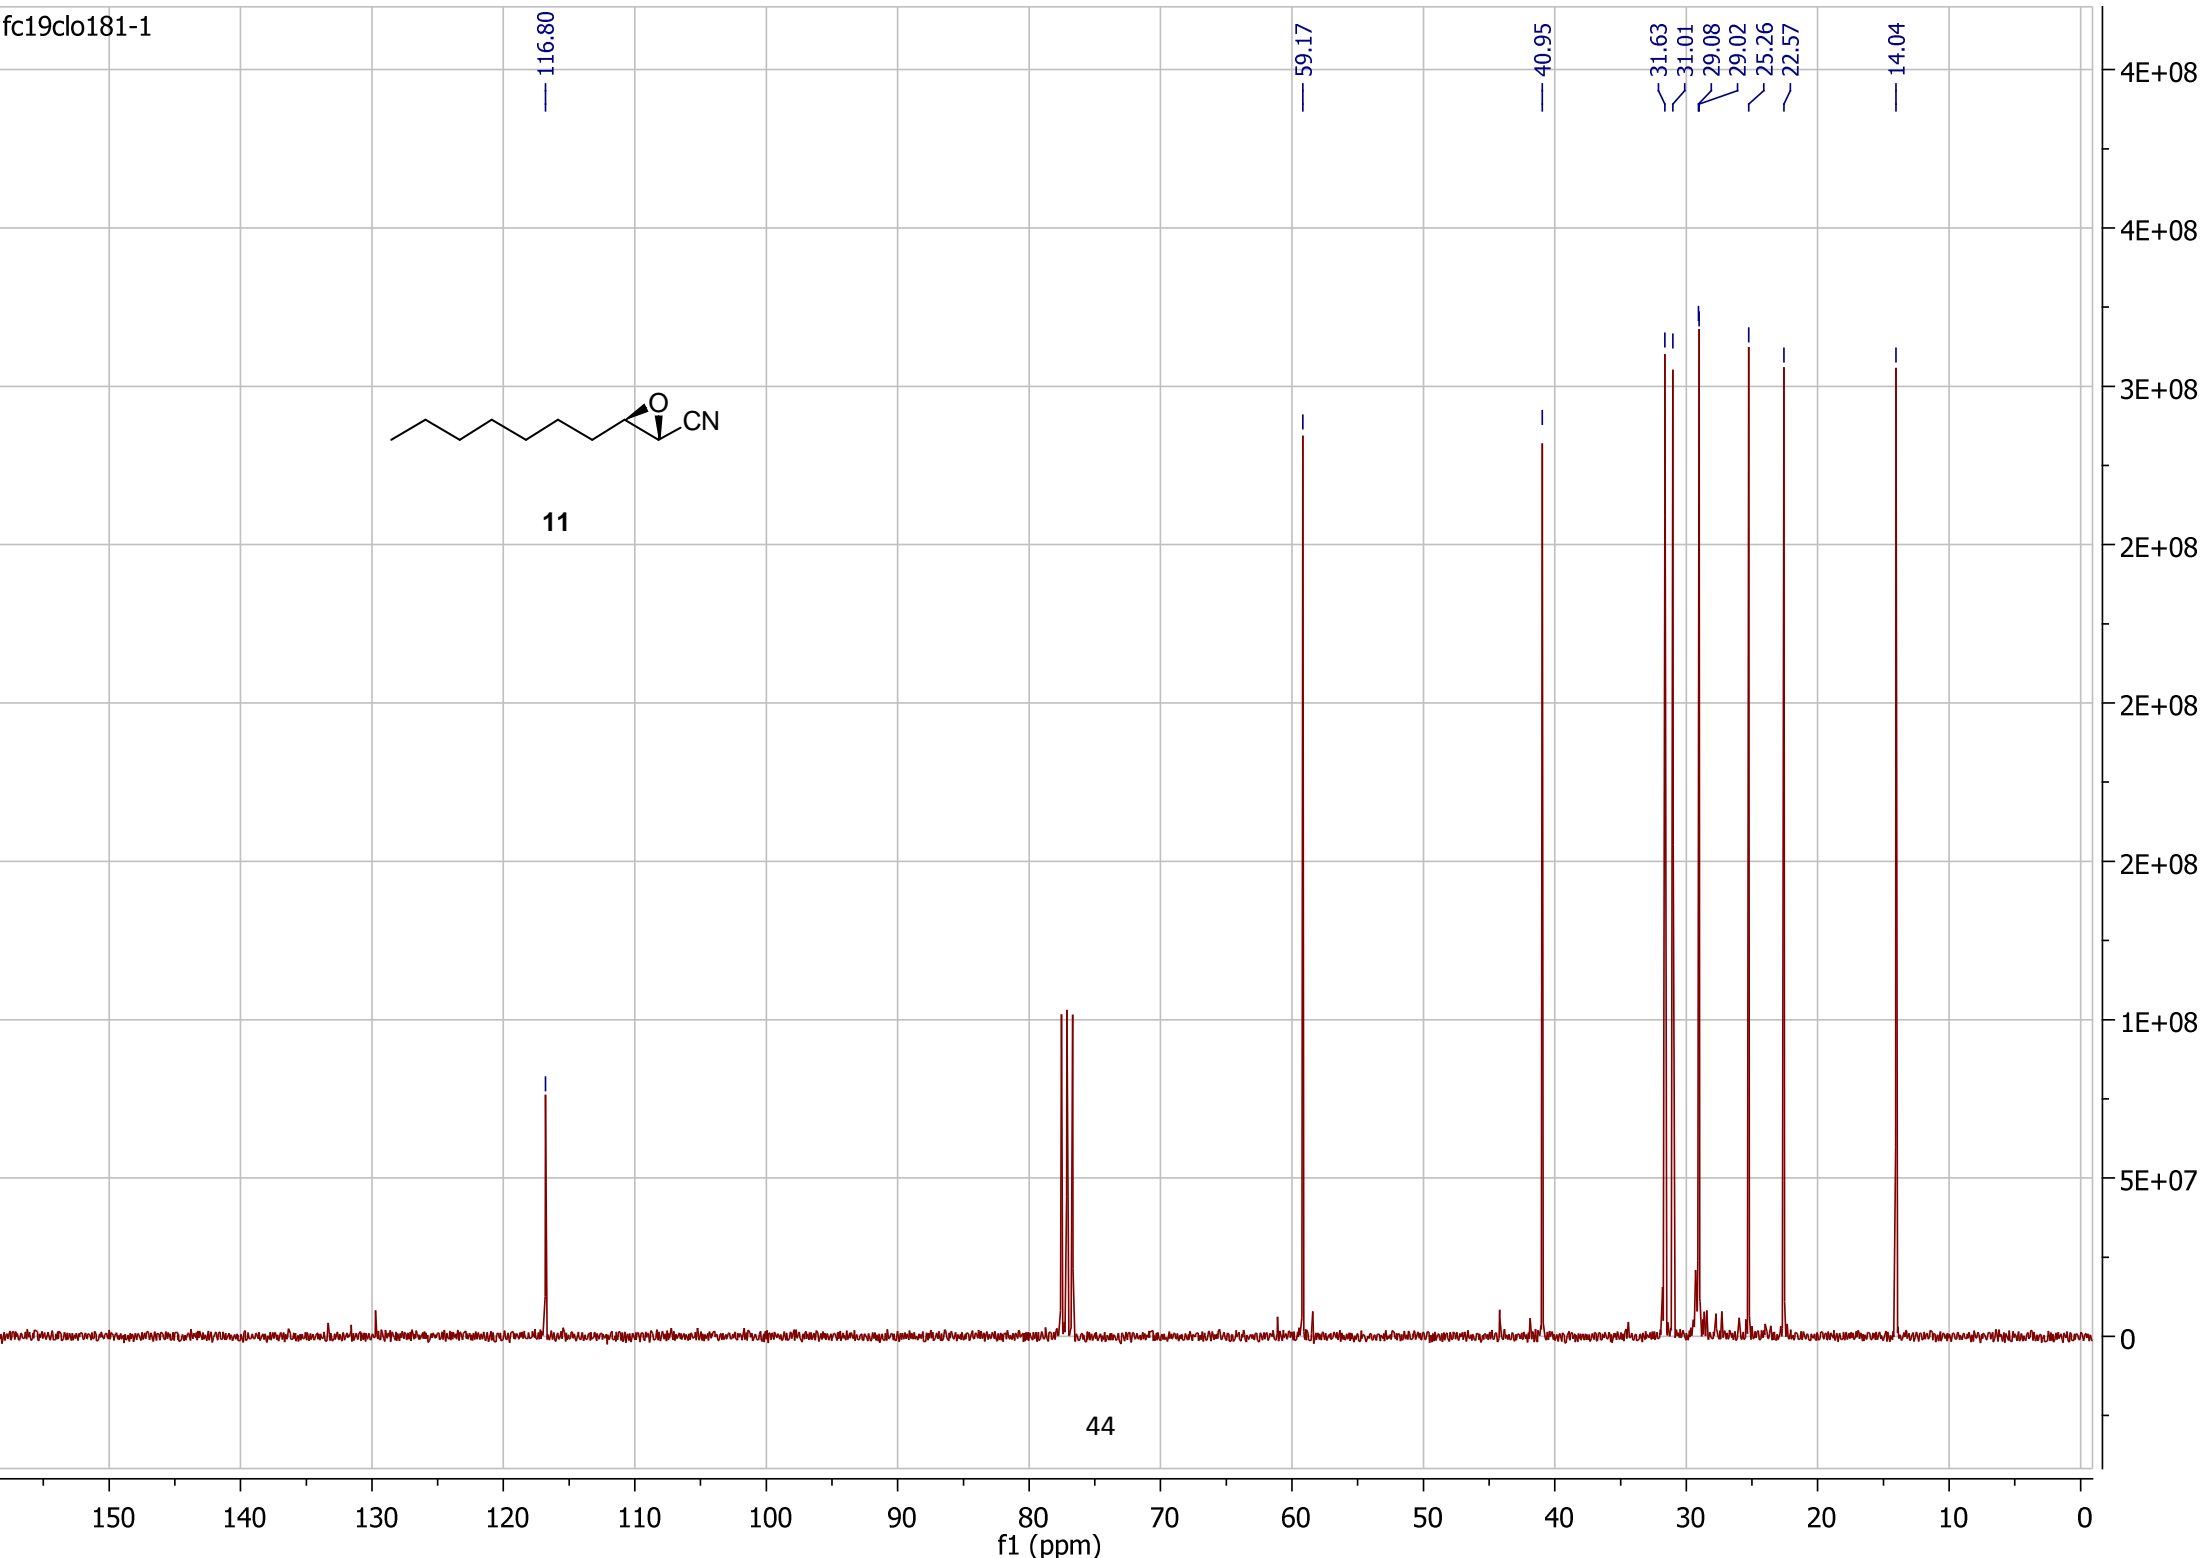

11

44

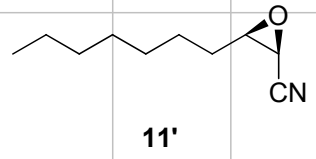

3.47  
3.46  
3.22  
3.20  
3.20  
3.18  
3.18  
3.16

1.85

1.15

0.92

0.90

0.87

0.84

0.92

12.47

3.03

f1 (ppm)

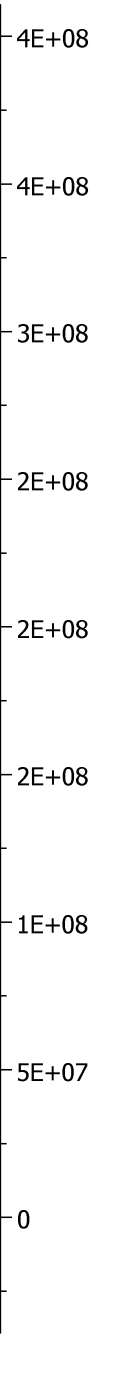

fc19clo181-3

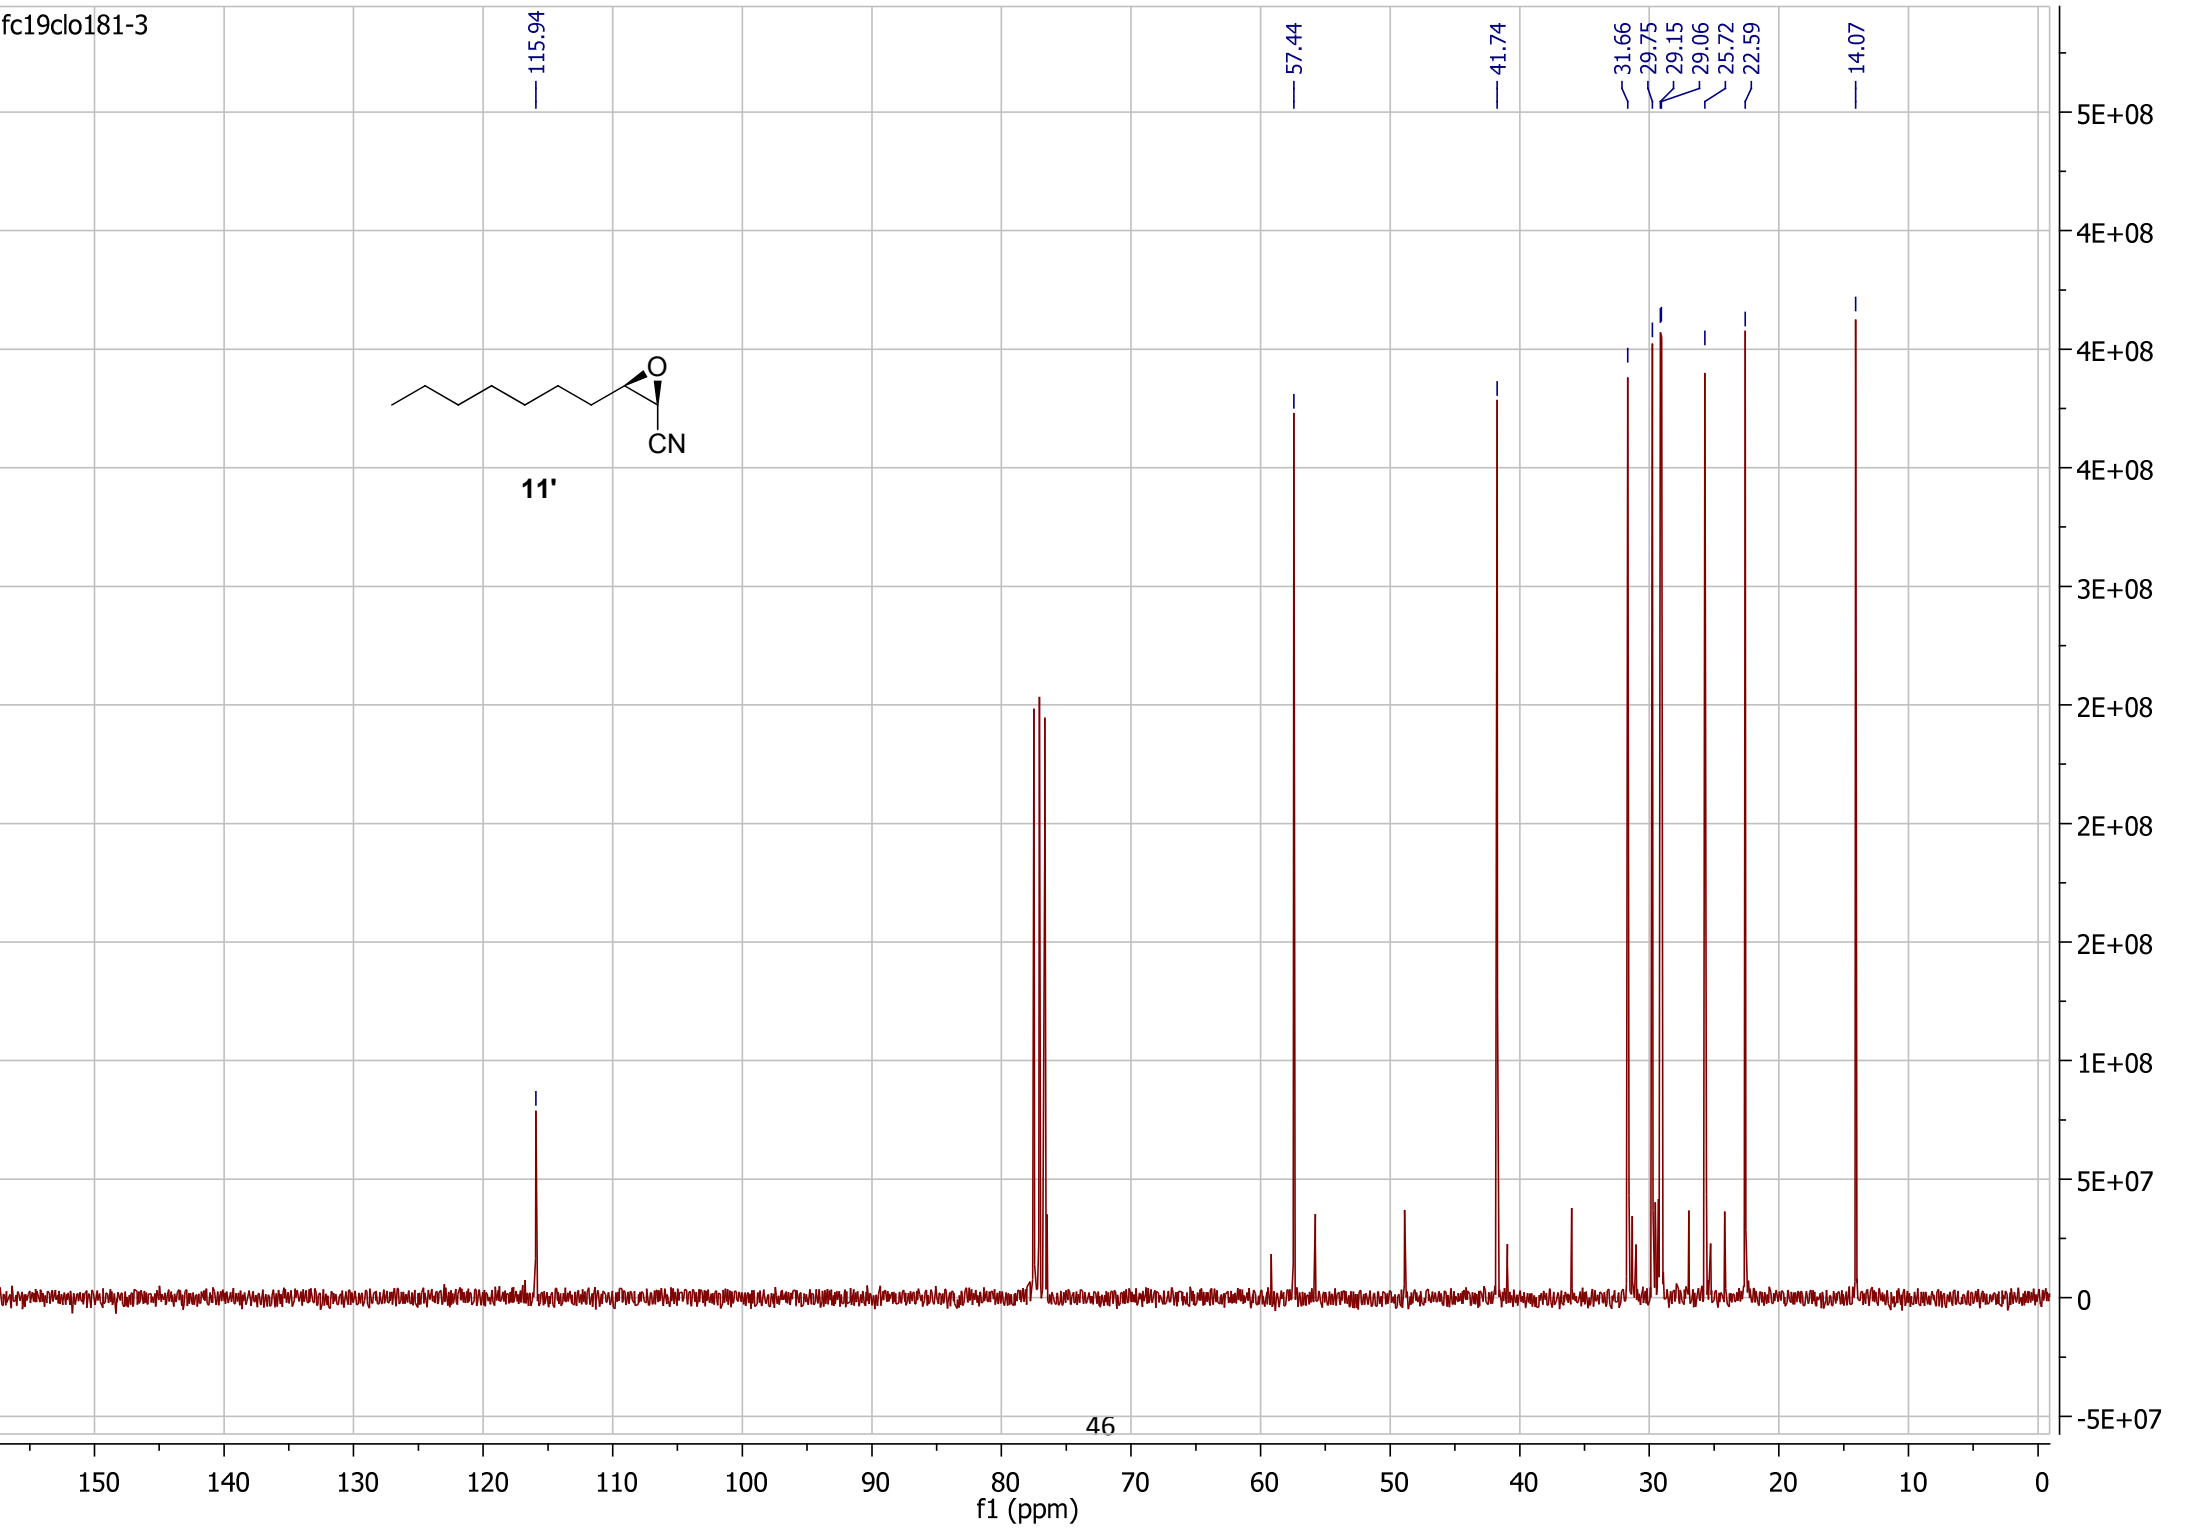

11'

46

f1 (ppm)

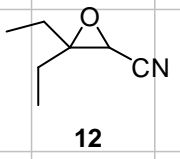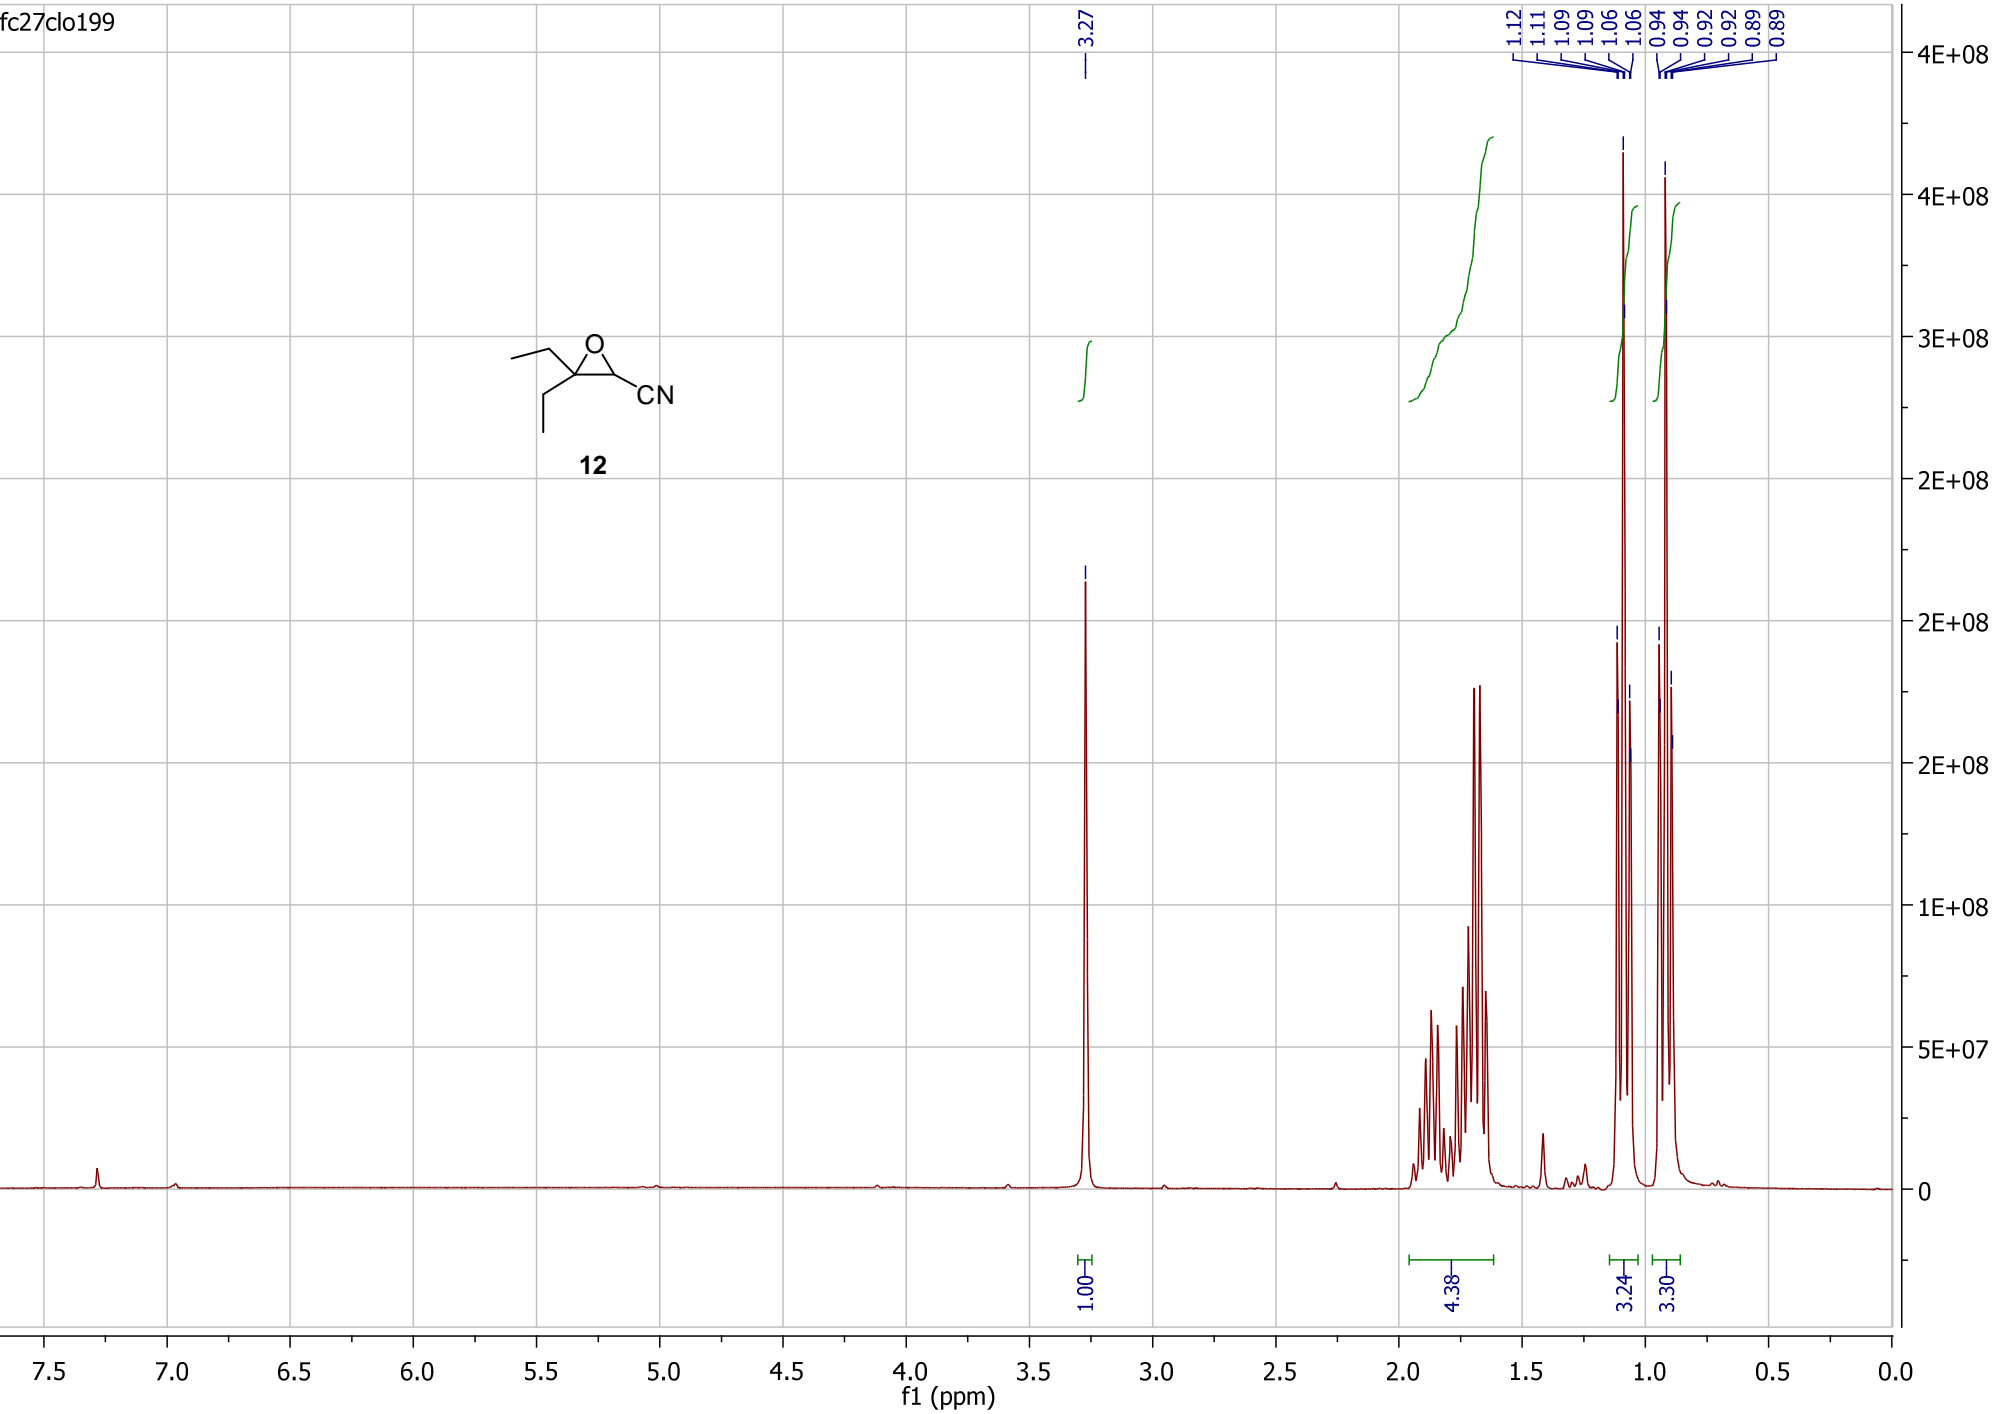

fc27clo199

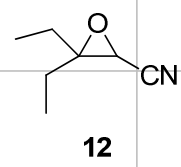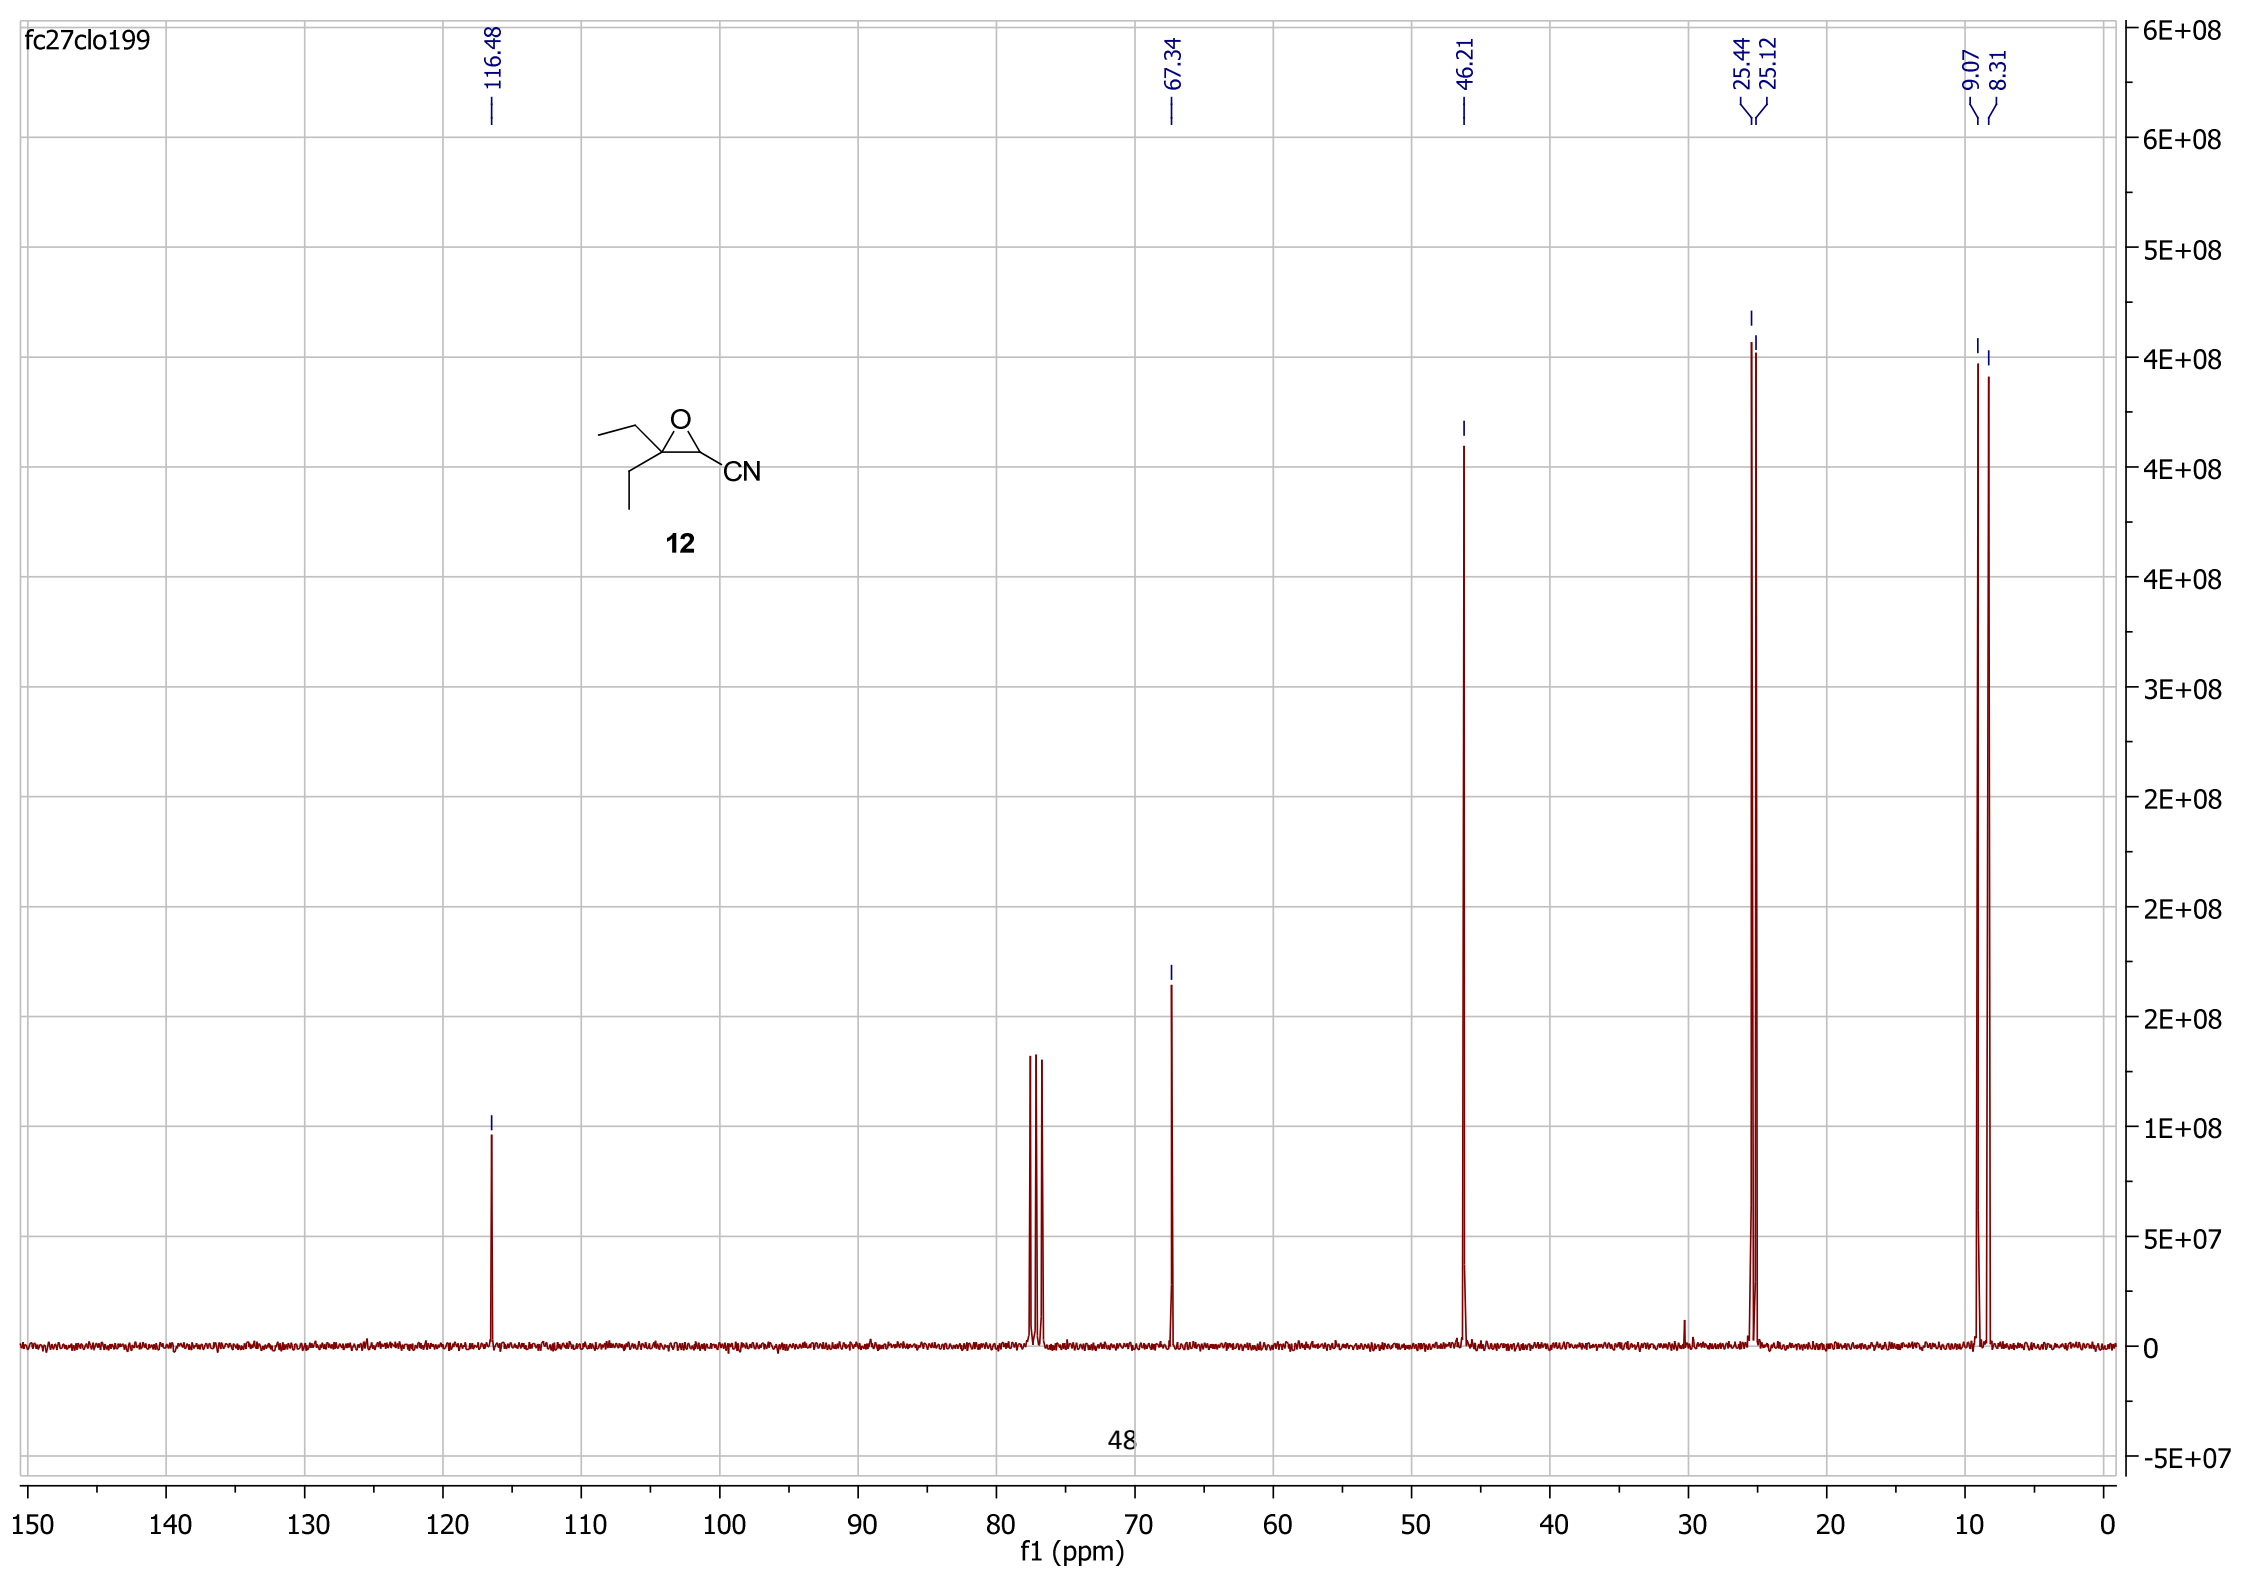



fc24clo190

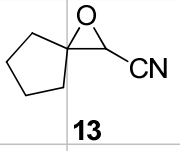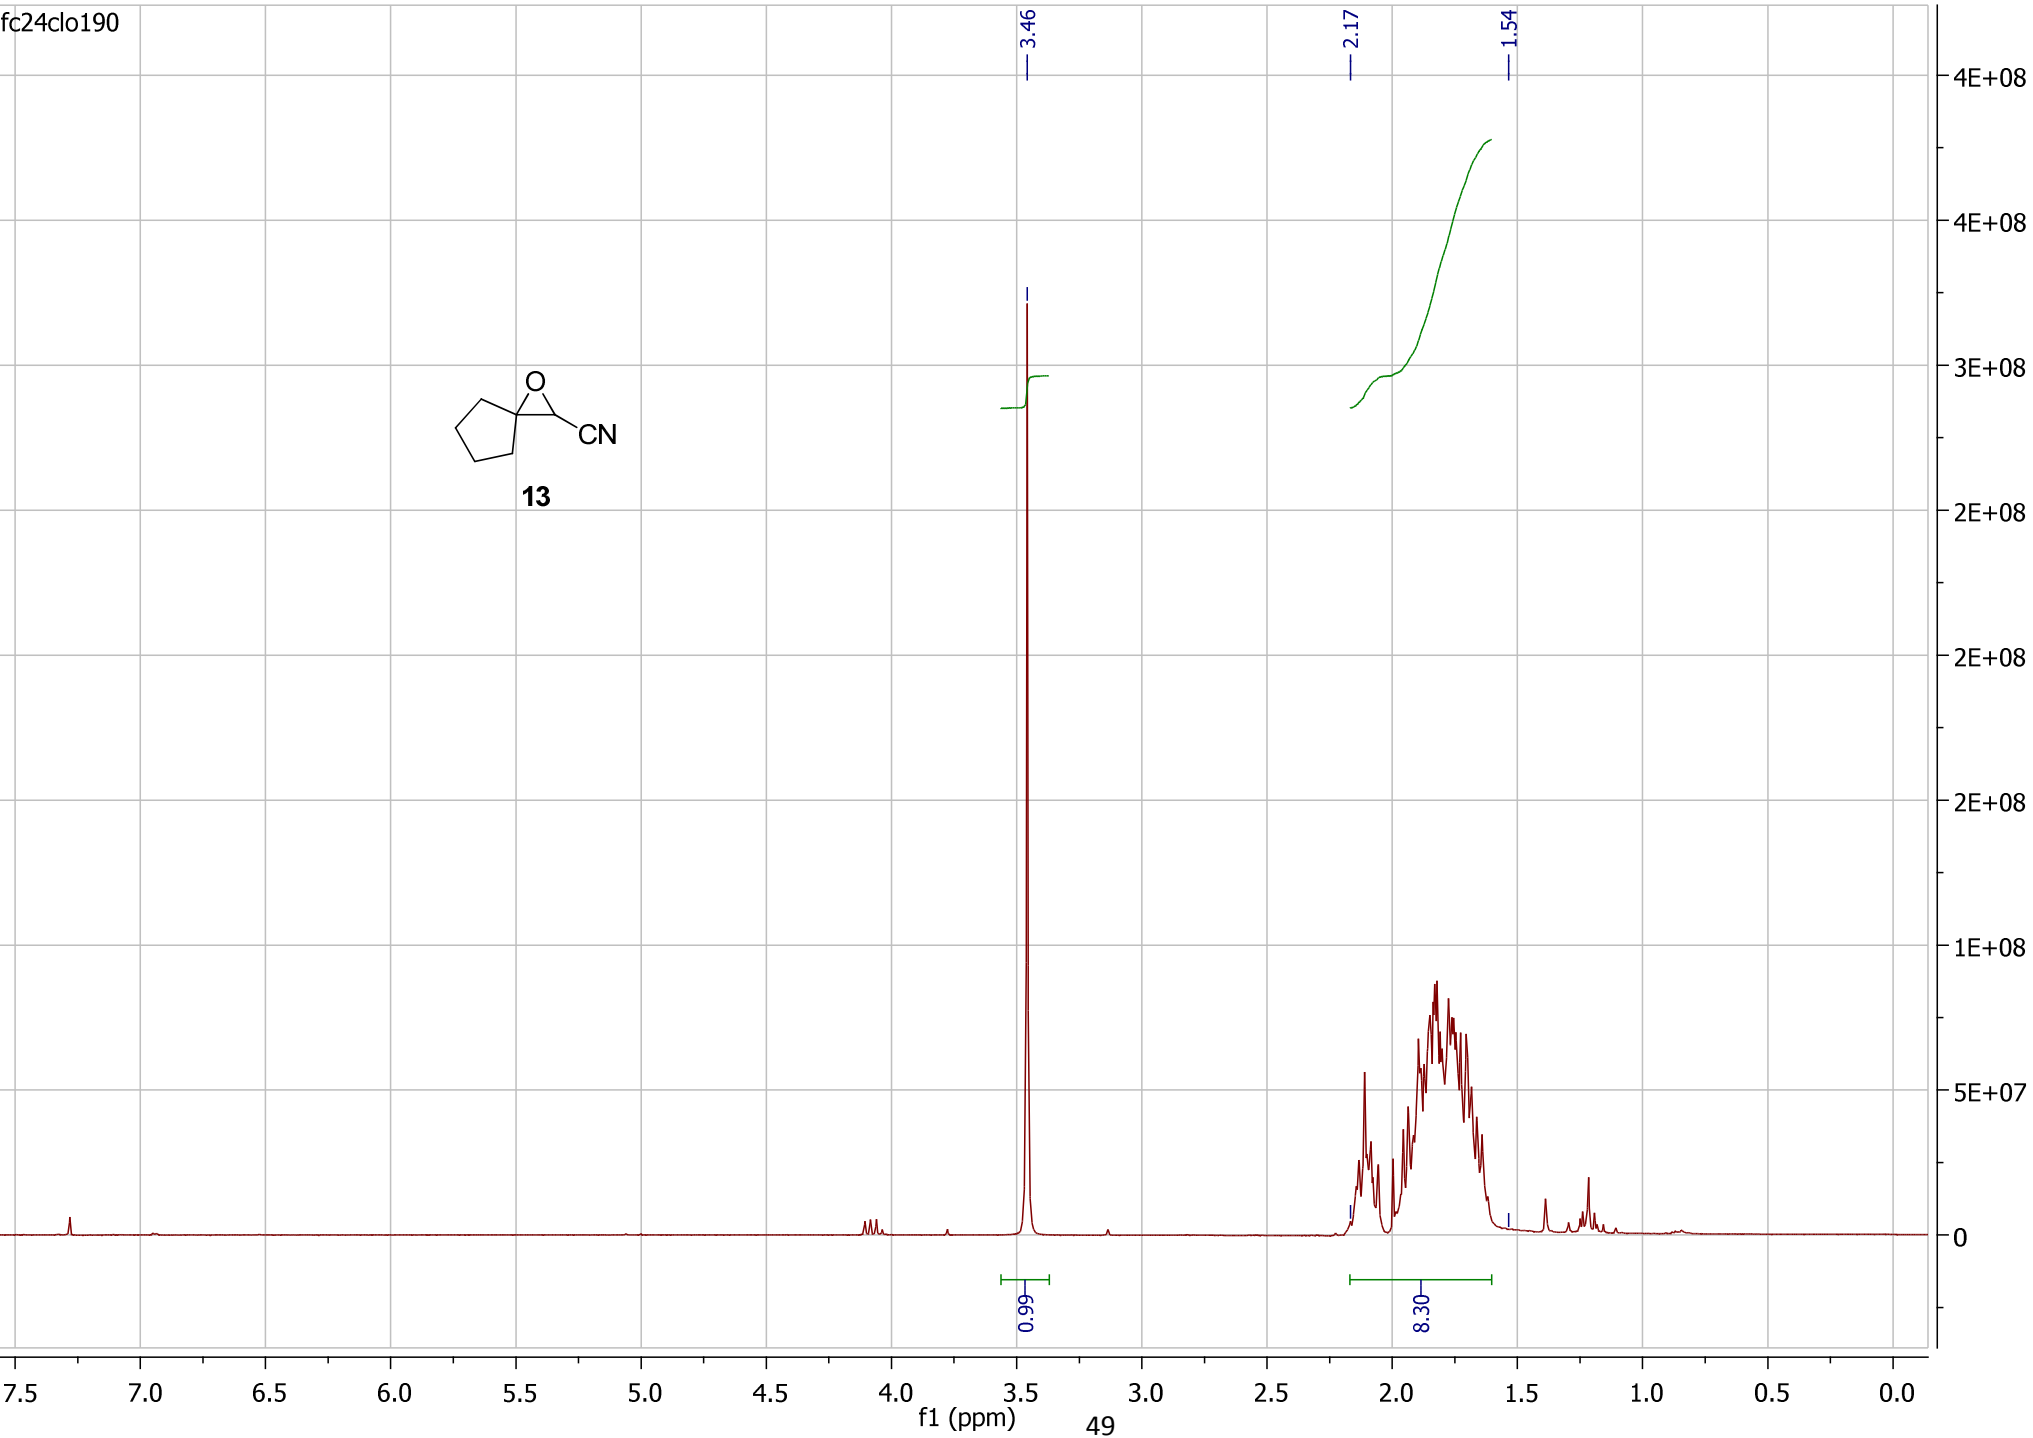

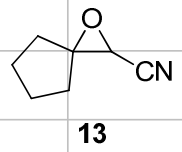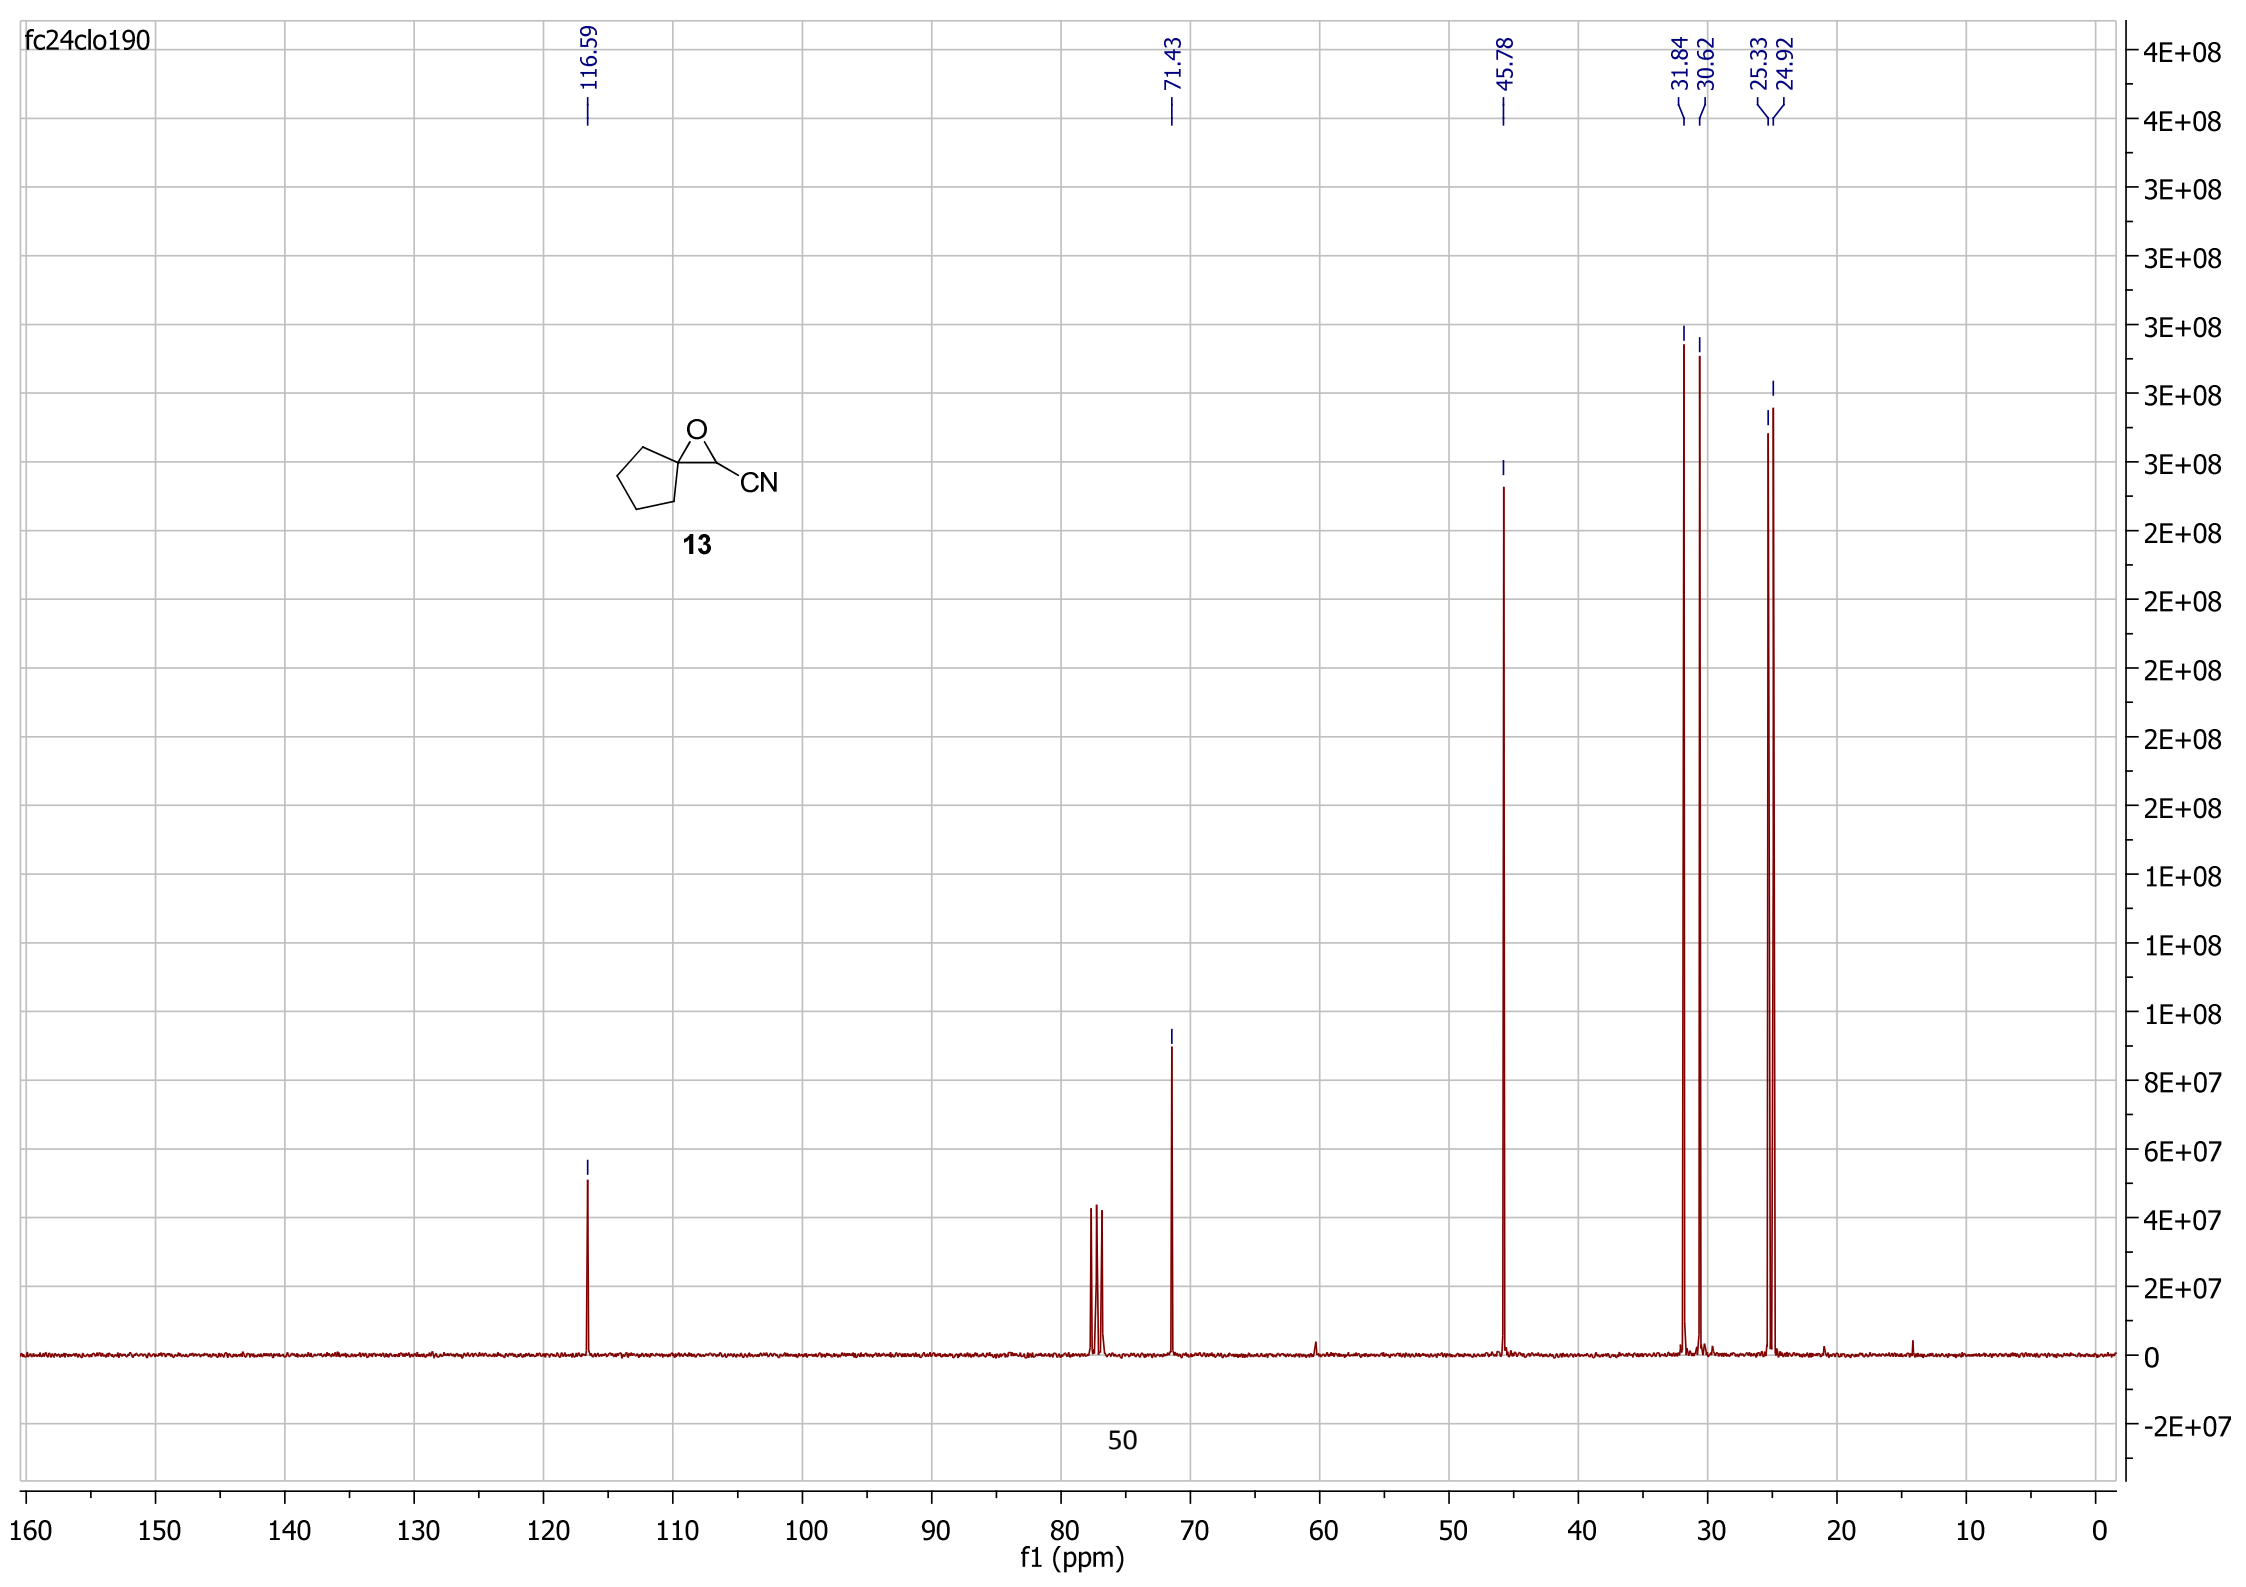

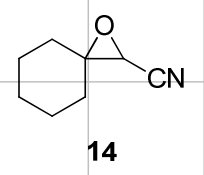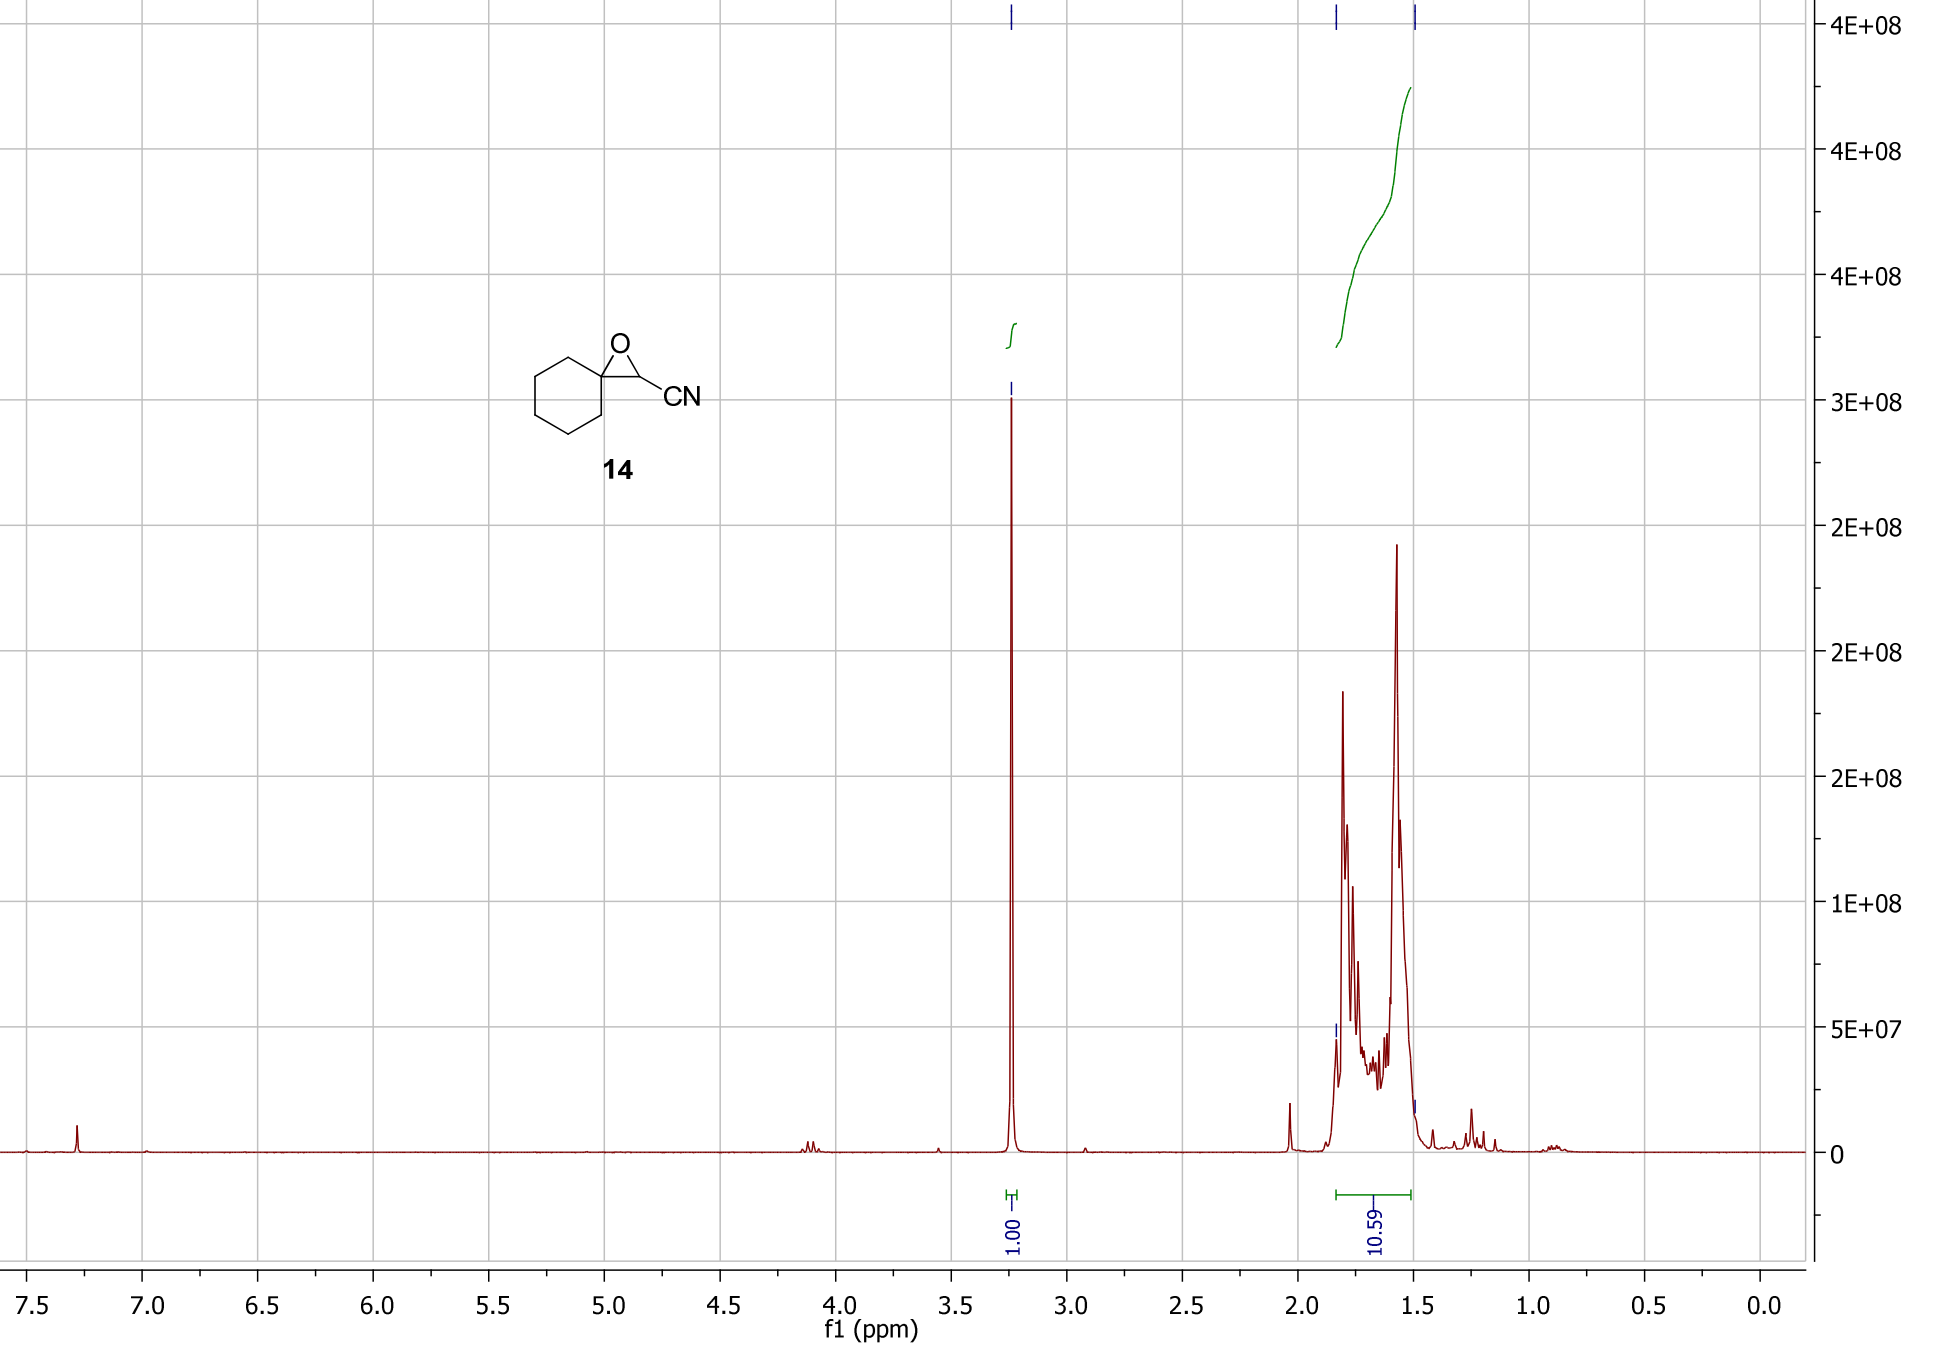

fc15clo175-fr1

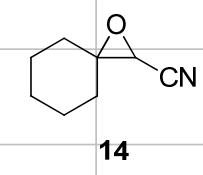

116.27  
65.46  
47.39  
33.17  
31.07  
24.75  
24.58

150 140 130 120 110 100 90 80 70 60 50 40 30 20 10

f1 (ppm)

52

6E+08  
6E+08  
6E+08  
5E+08  
4E+08  
4E+08  
4E+08  
3E+08  
2E+08  
2E+08  
2E+08  
2E+08  
1E+08  
5E+07  
0  
-5E+07

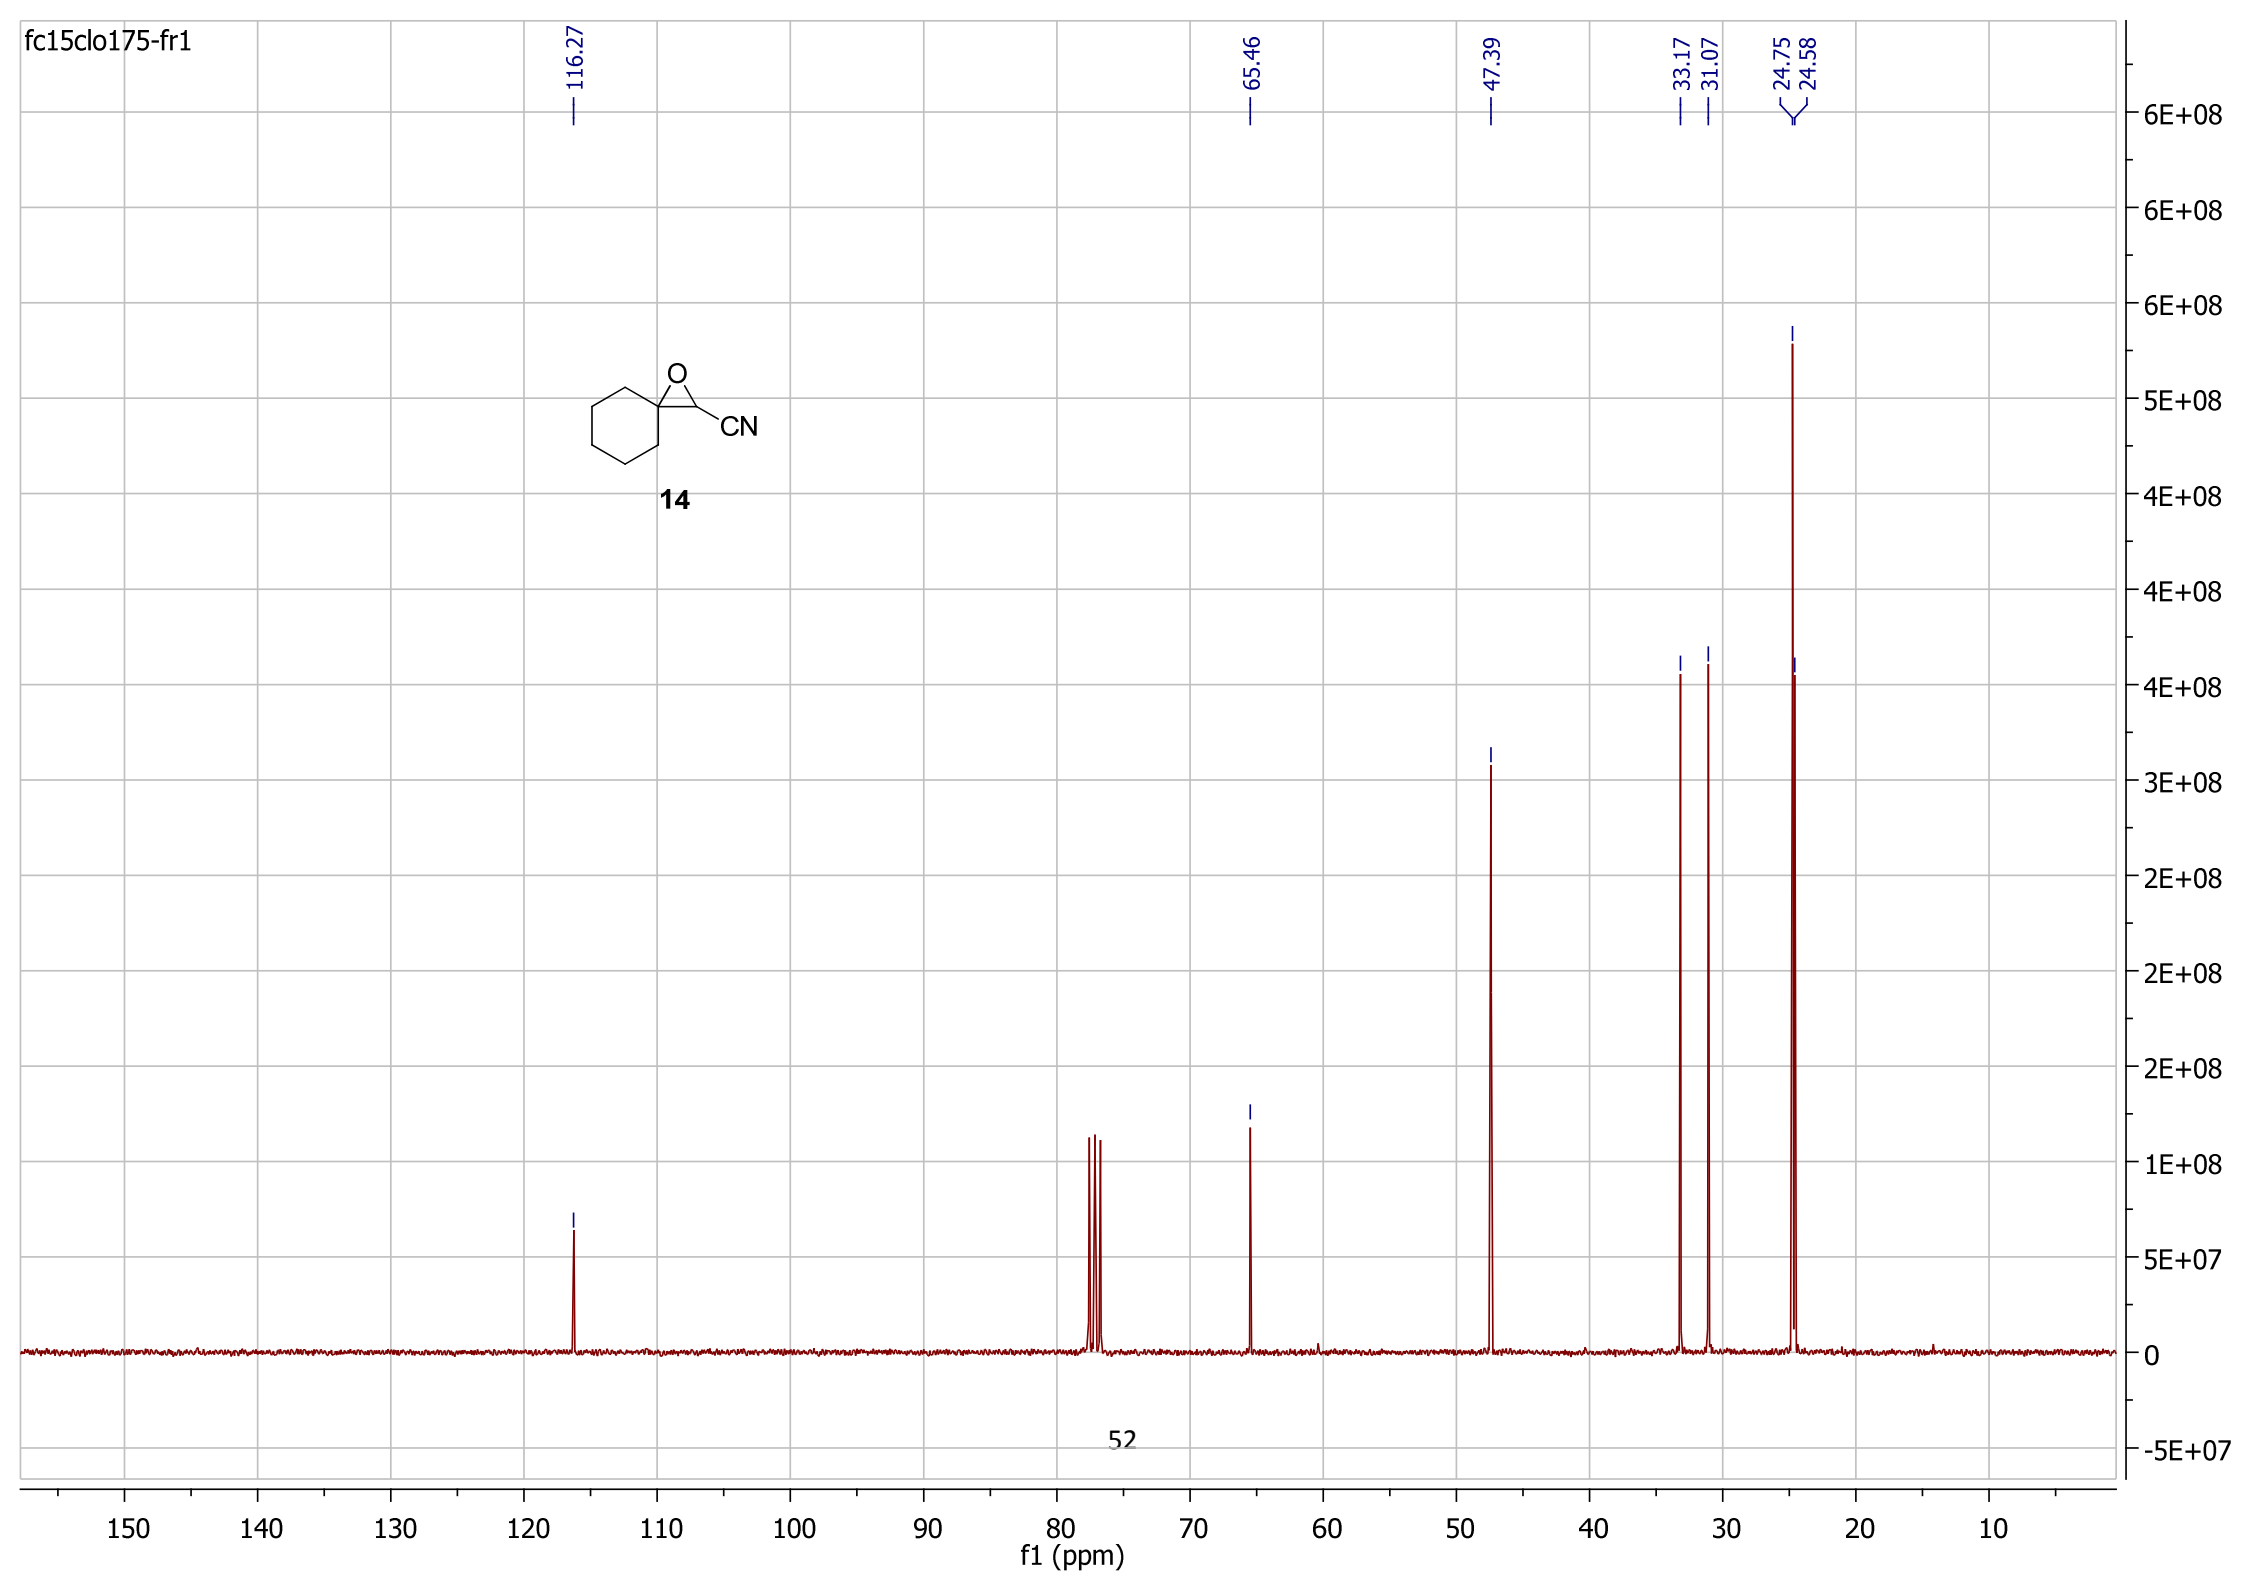

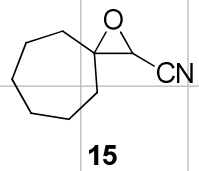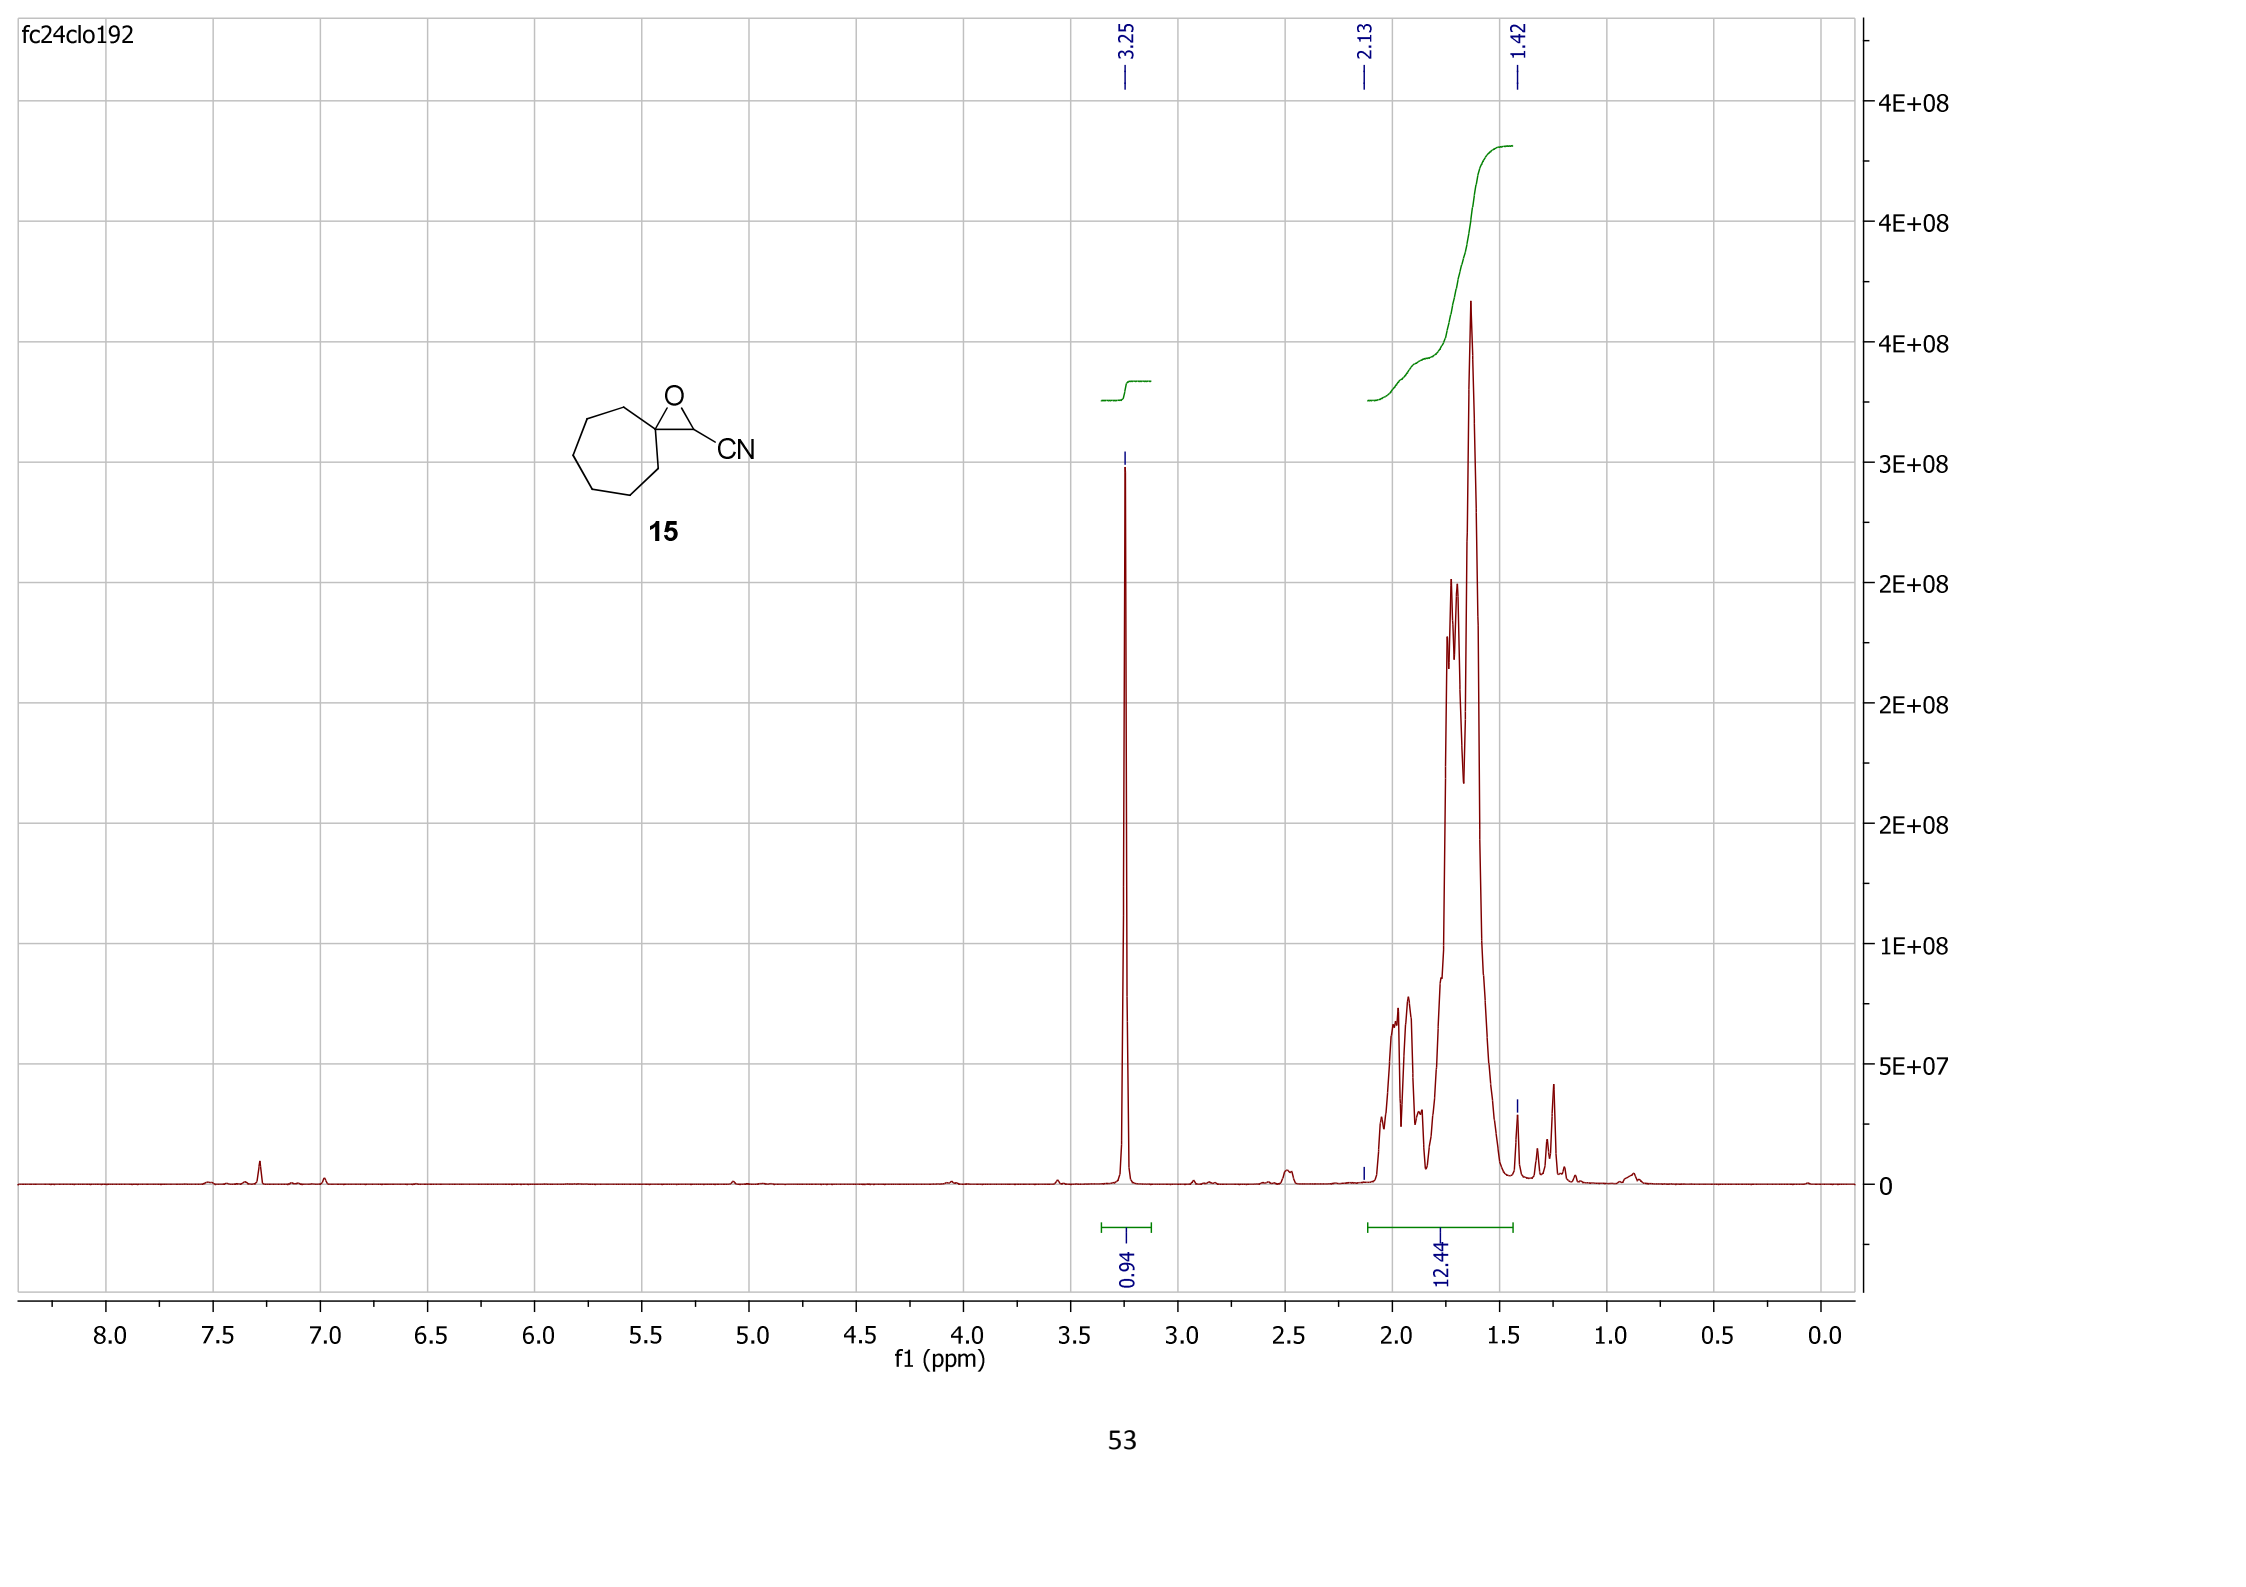

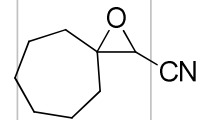

15

116.46

66.79

48.58

35.46

33.17

28.84

28.68

24.33

23.99

54

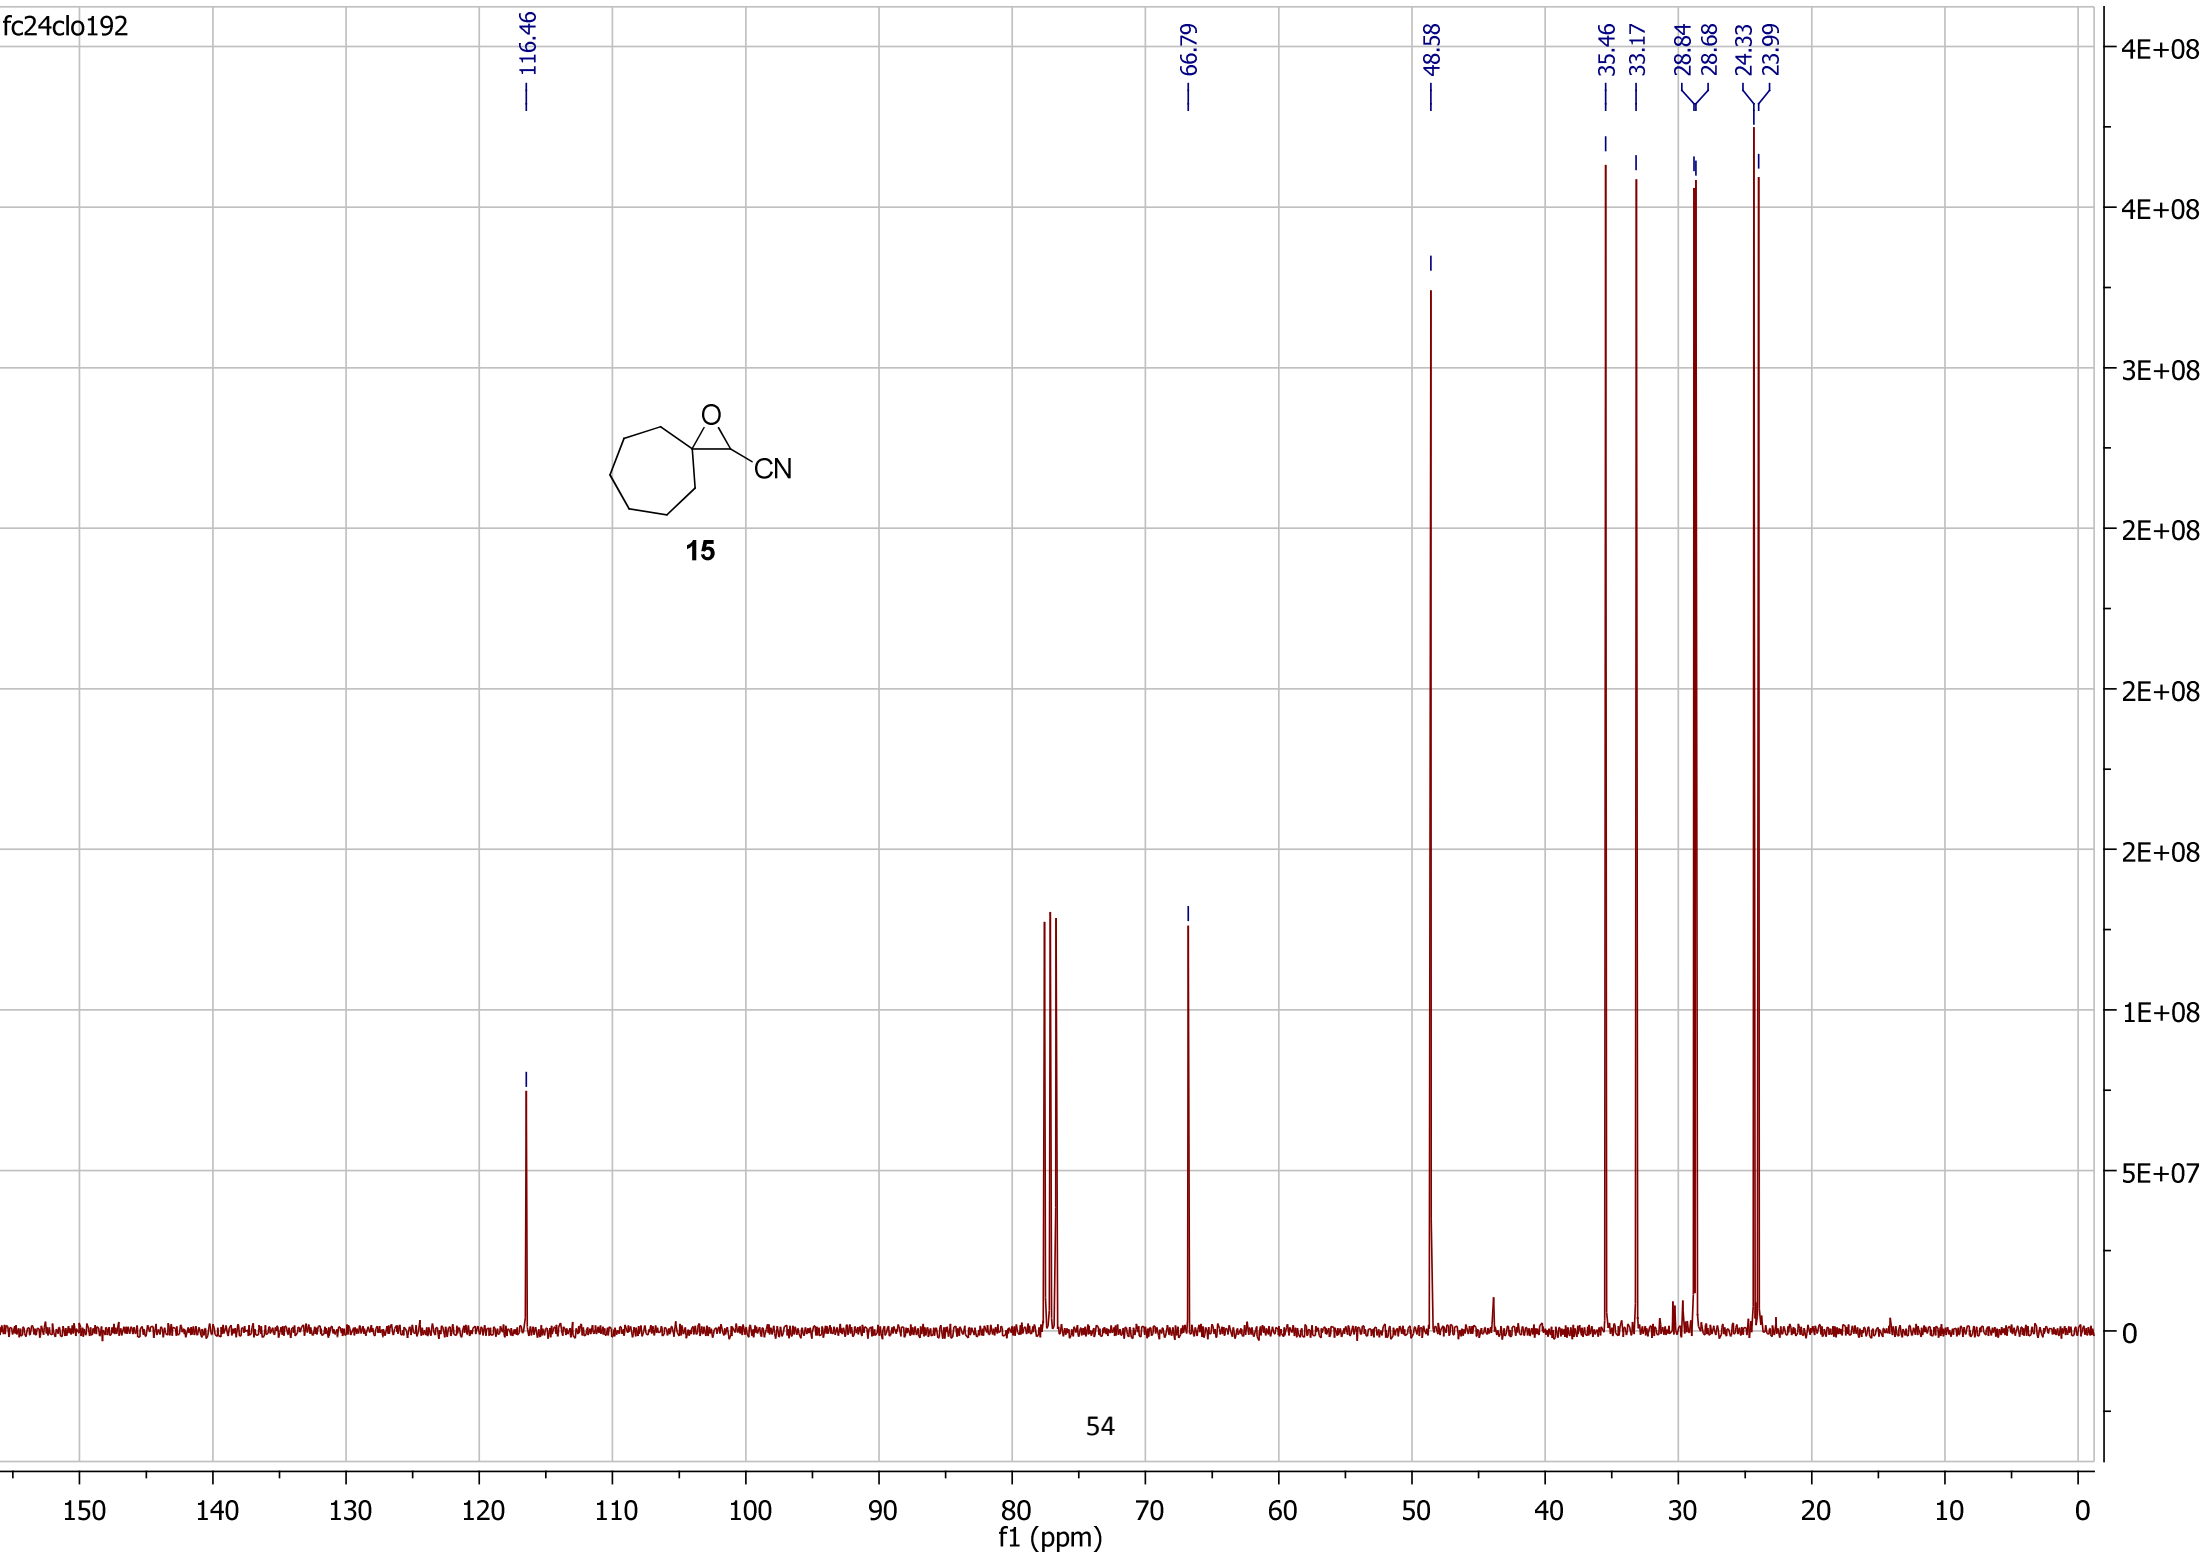

fc24clo191

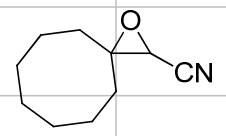

16

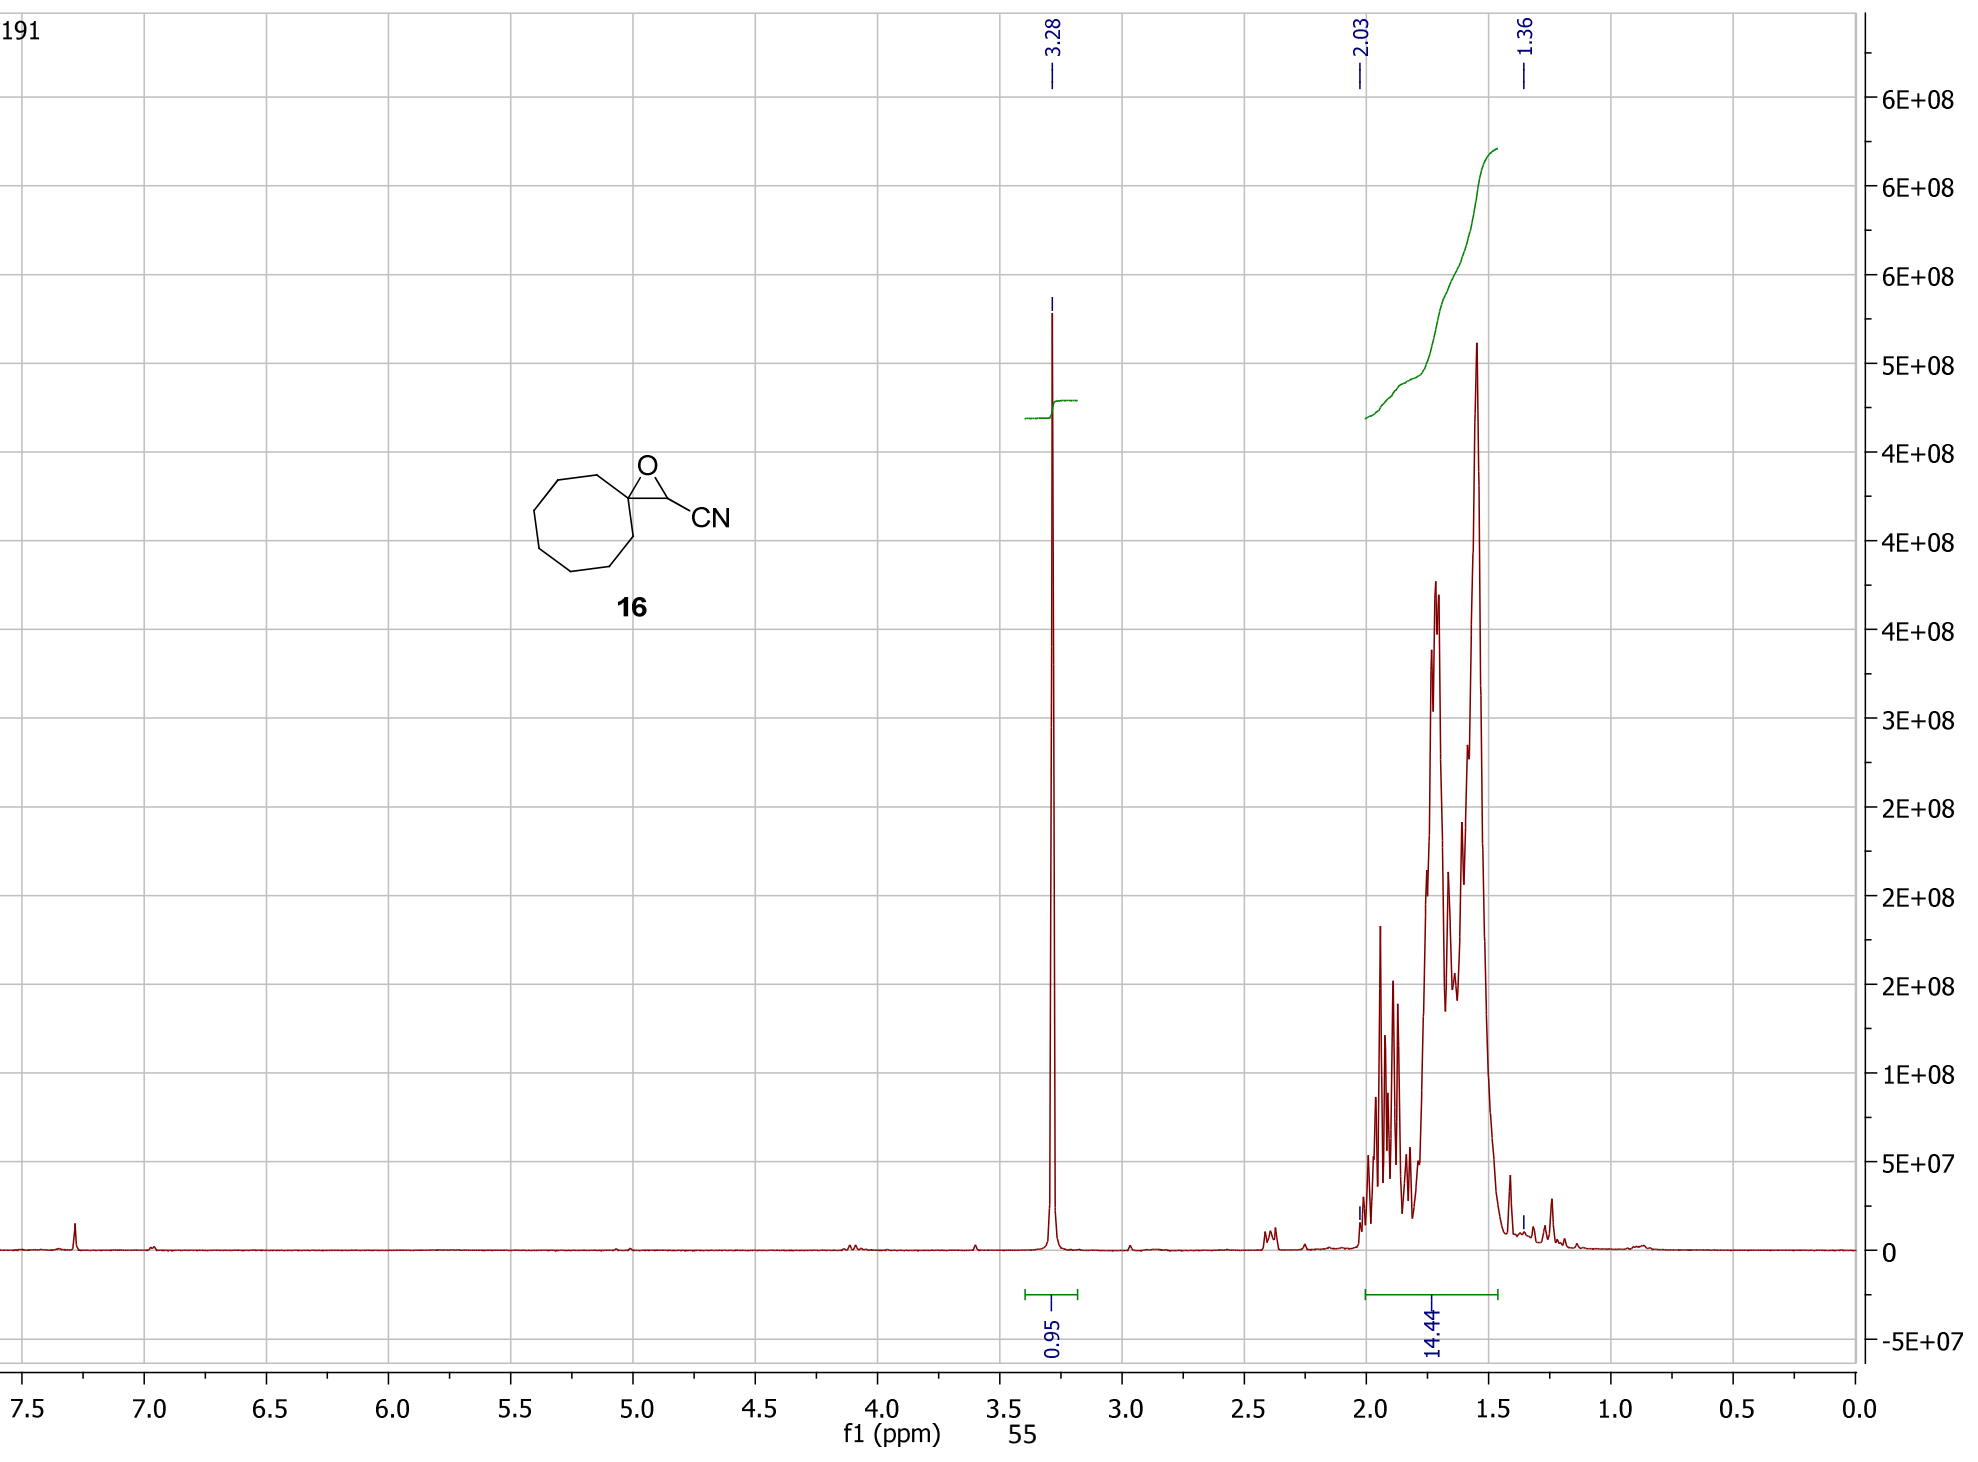

fc24clo191

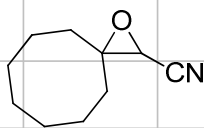

**16**

— 116.50

— 66.29

— 49.11

— 33.76

— 31.74

— 26.45

— 25.89

— 24.96

— 24.35

— 22.69

56

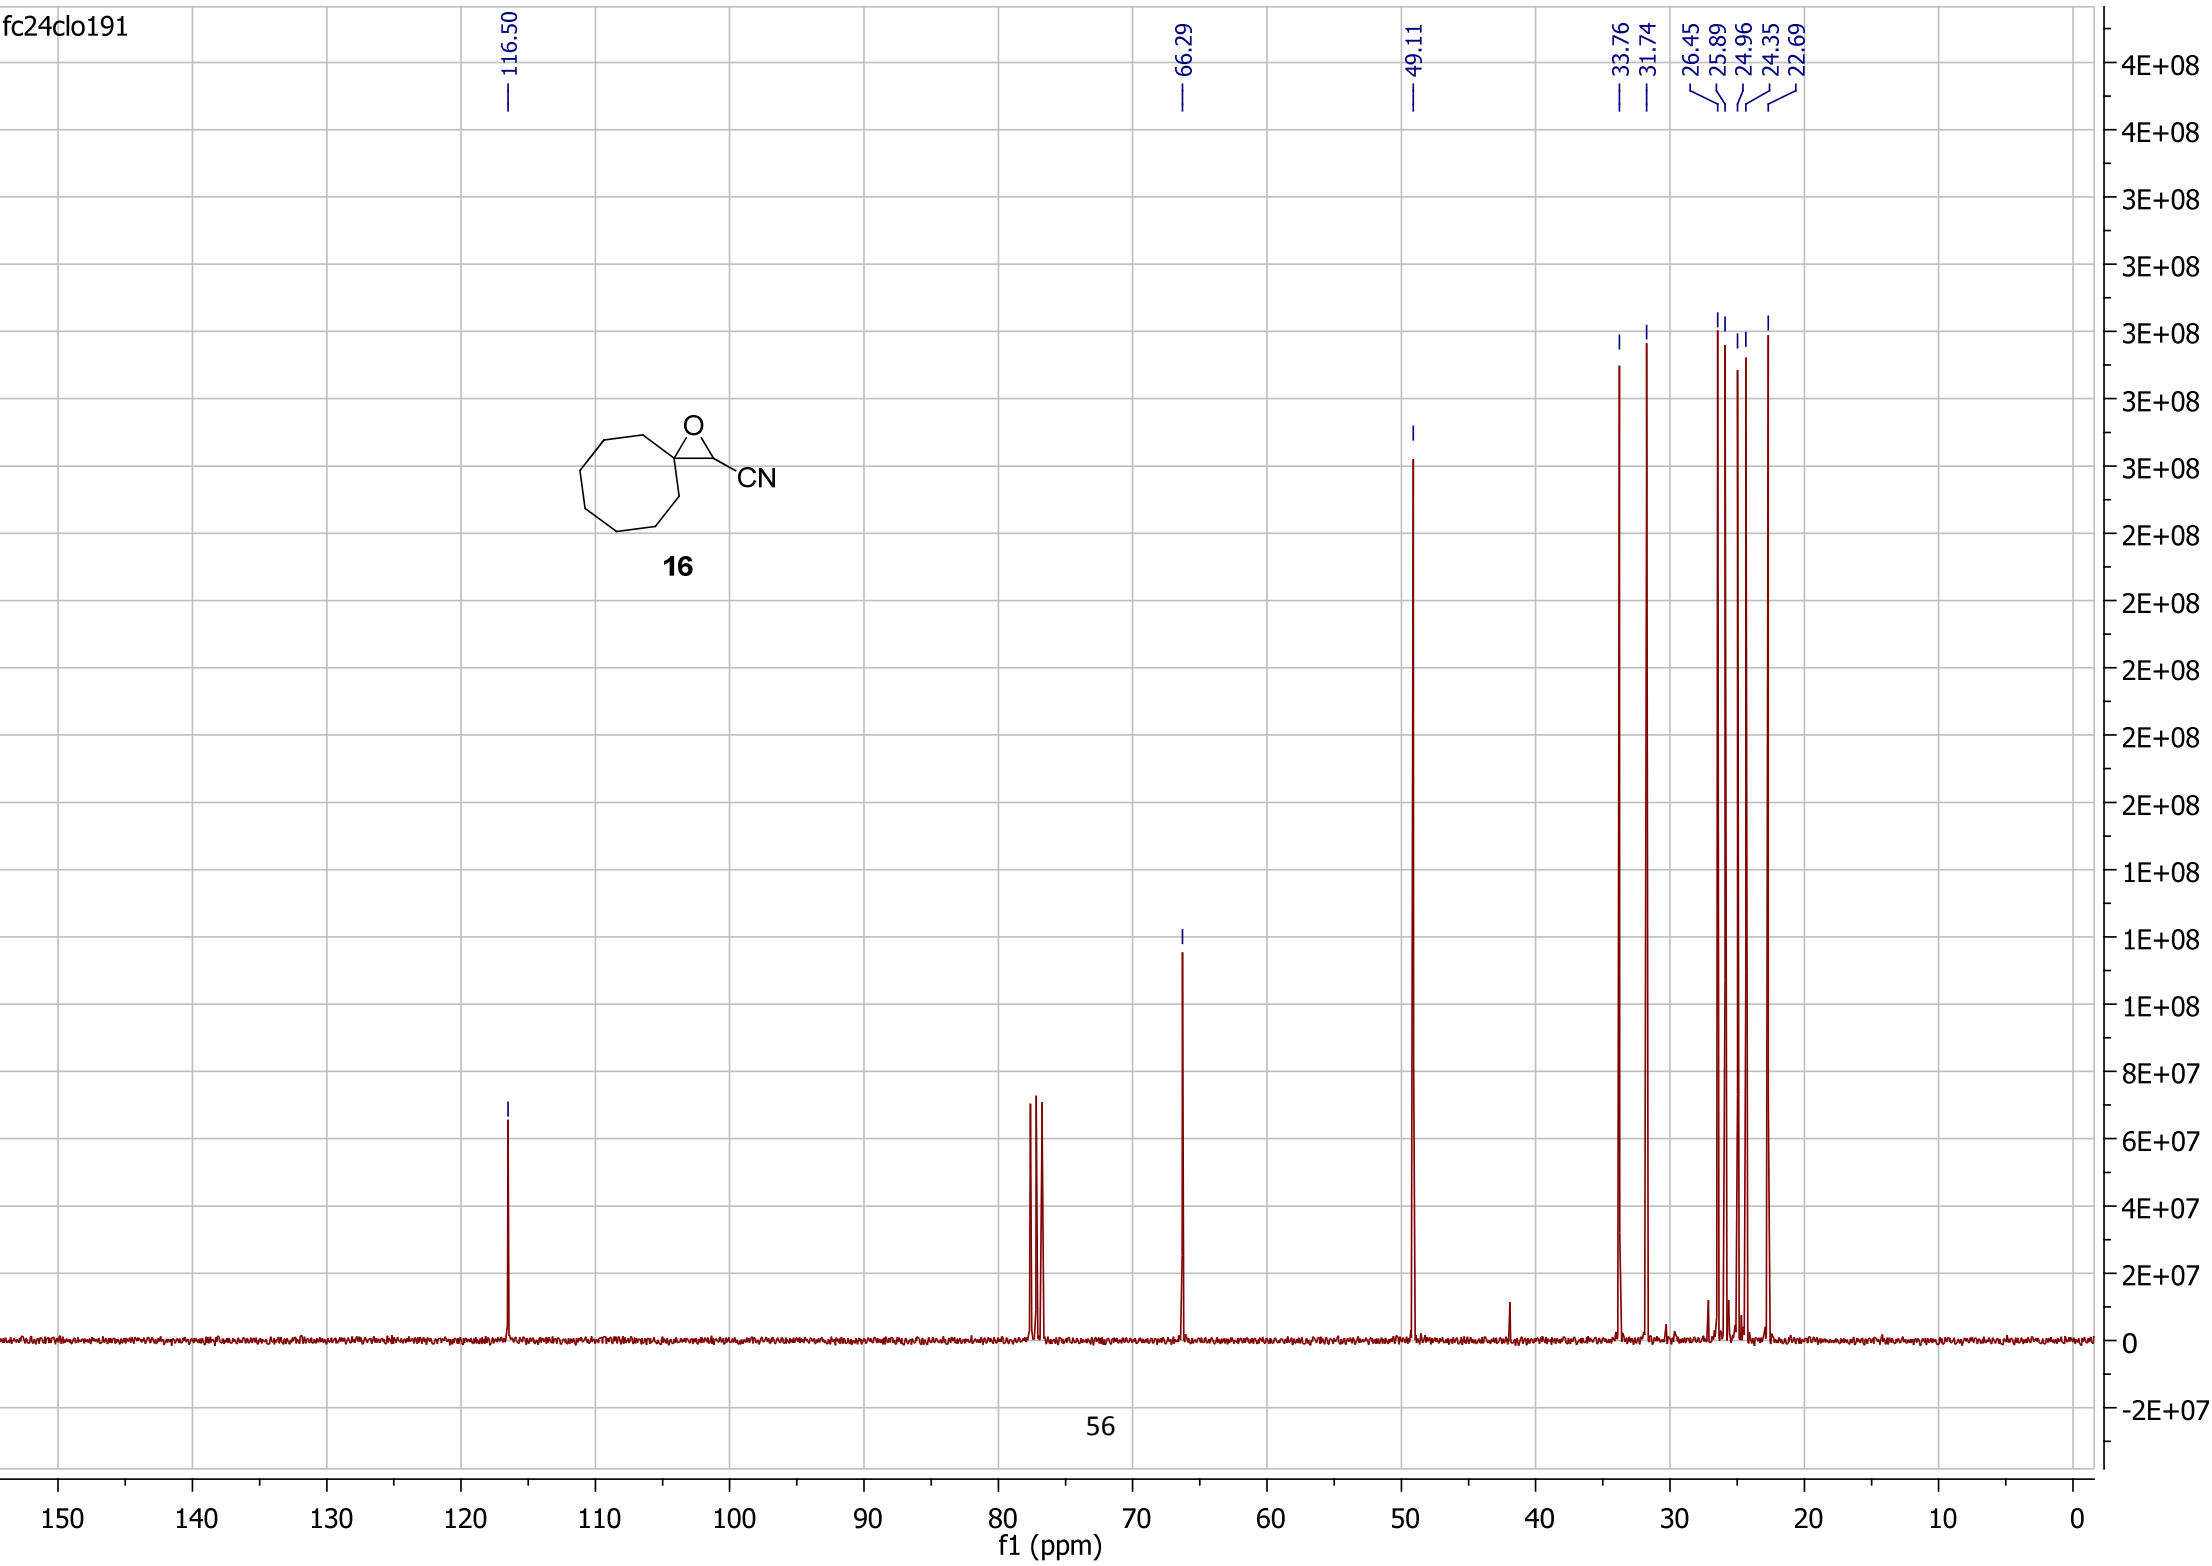



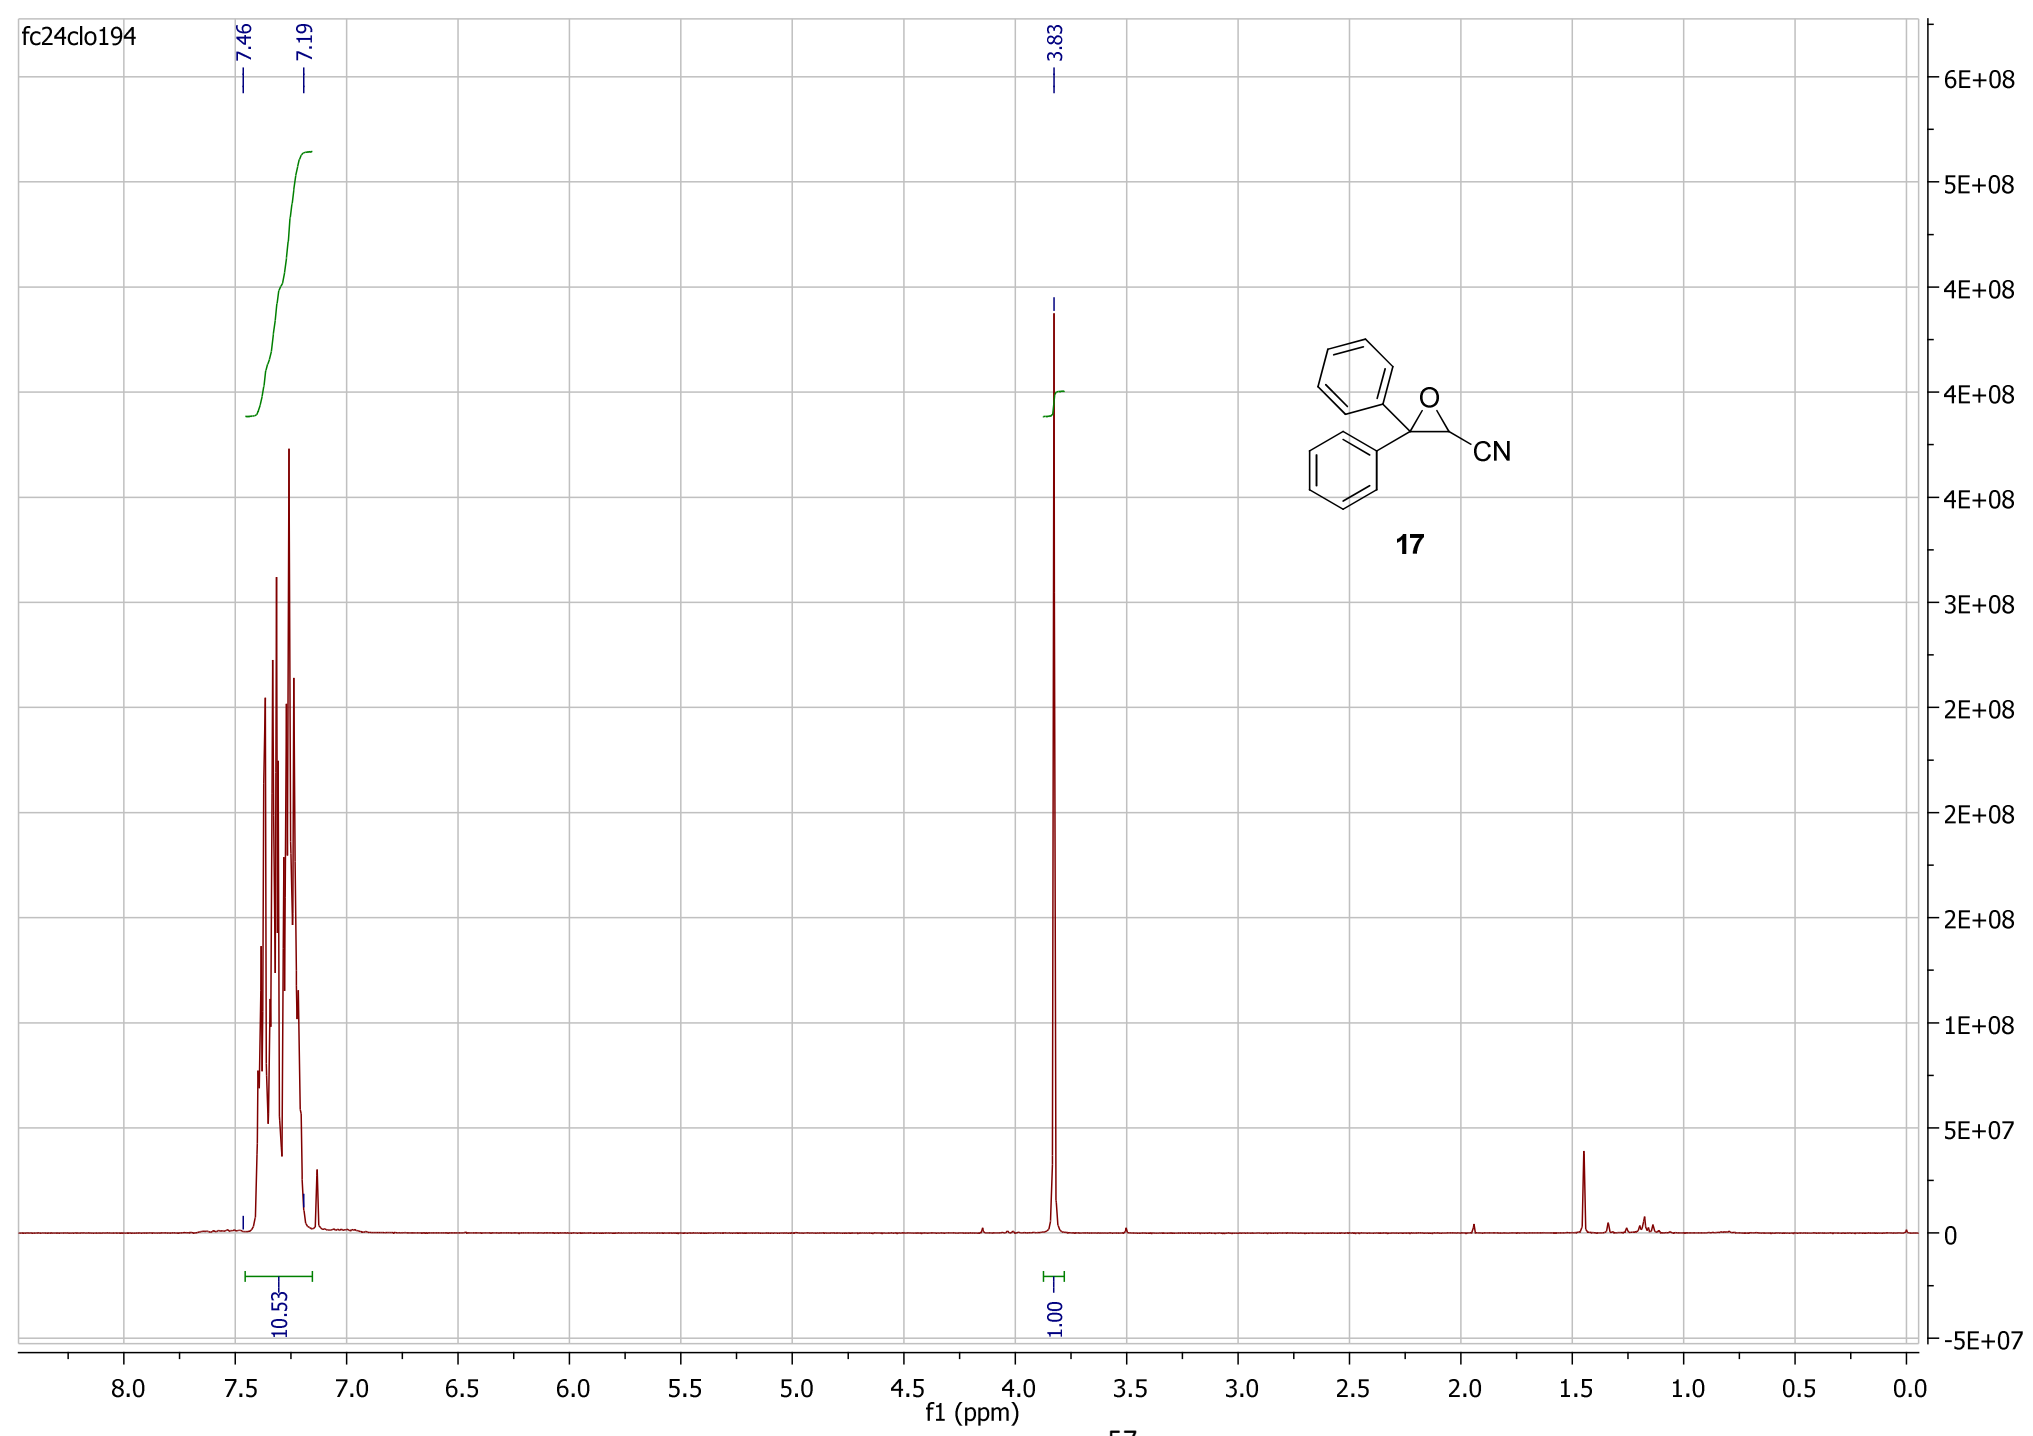

fc24clo194

136.44  
134.48  
129.34  
129.32  
128.81  
128.65  
127.72  
127.34

115.27

67.68

50.11

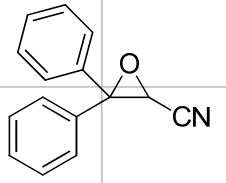

17

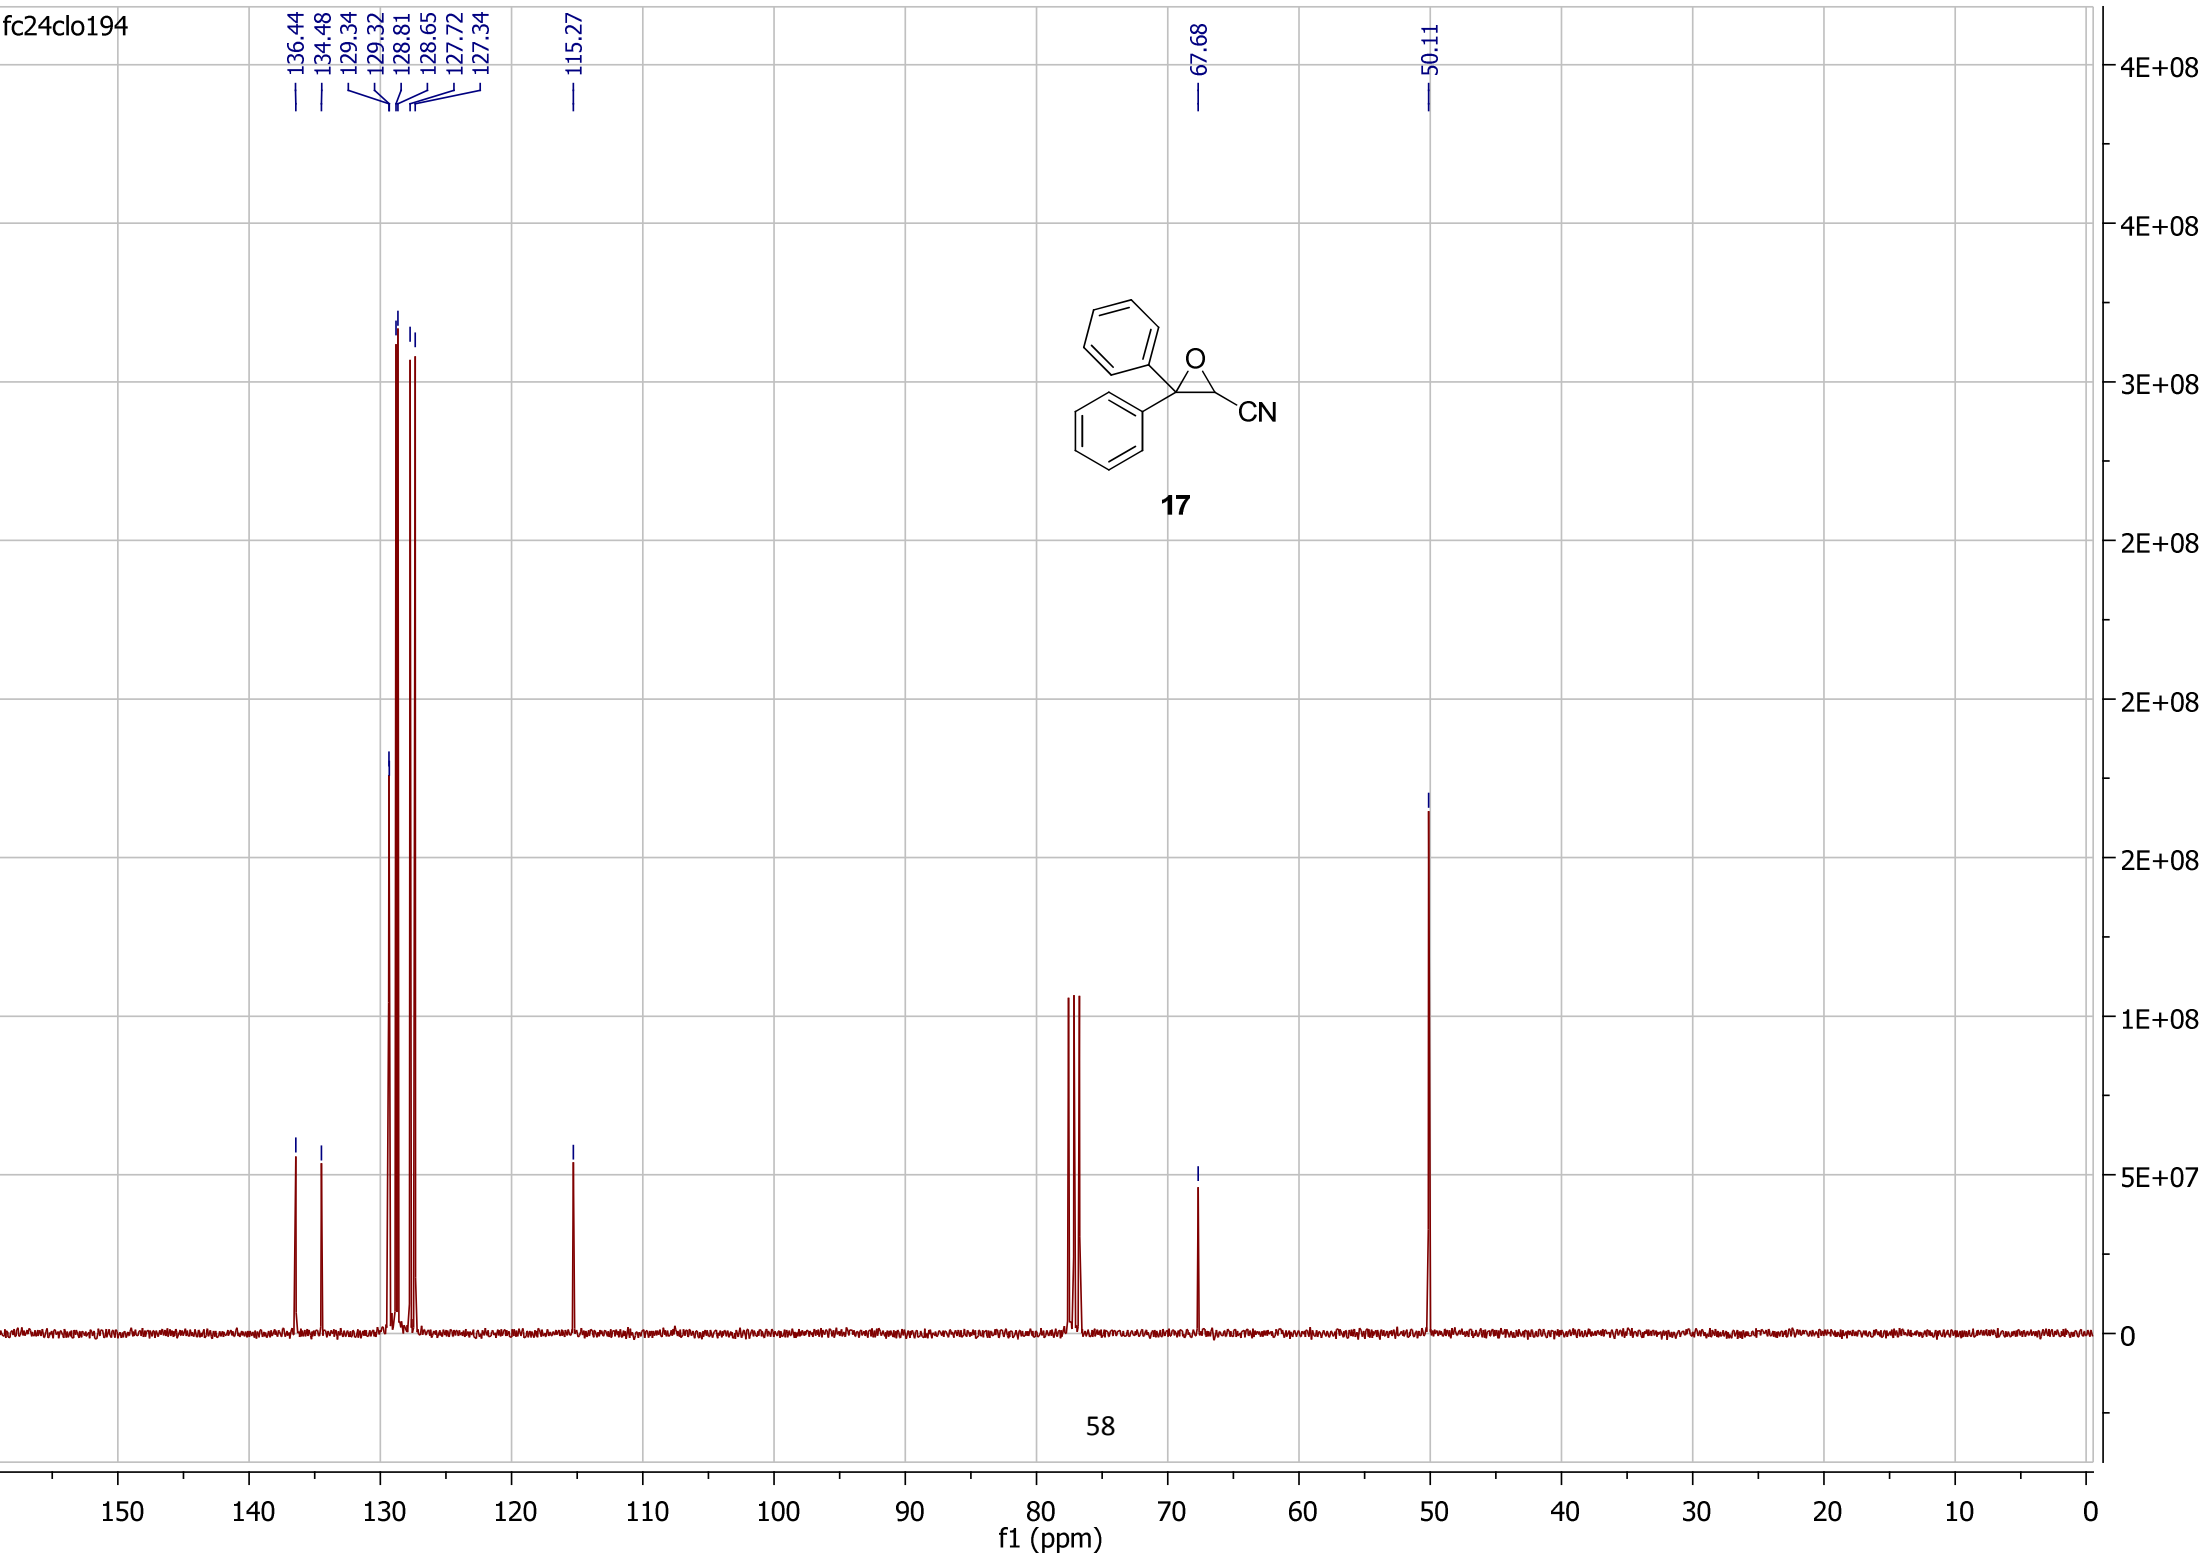

58

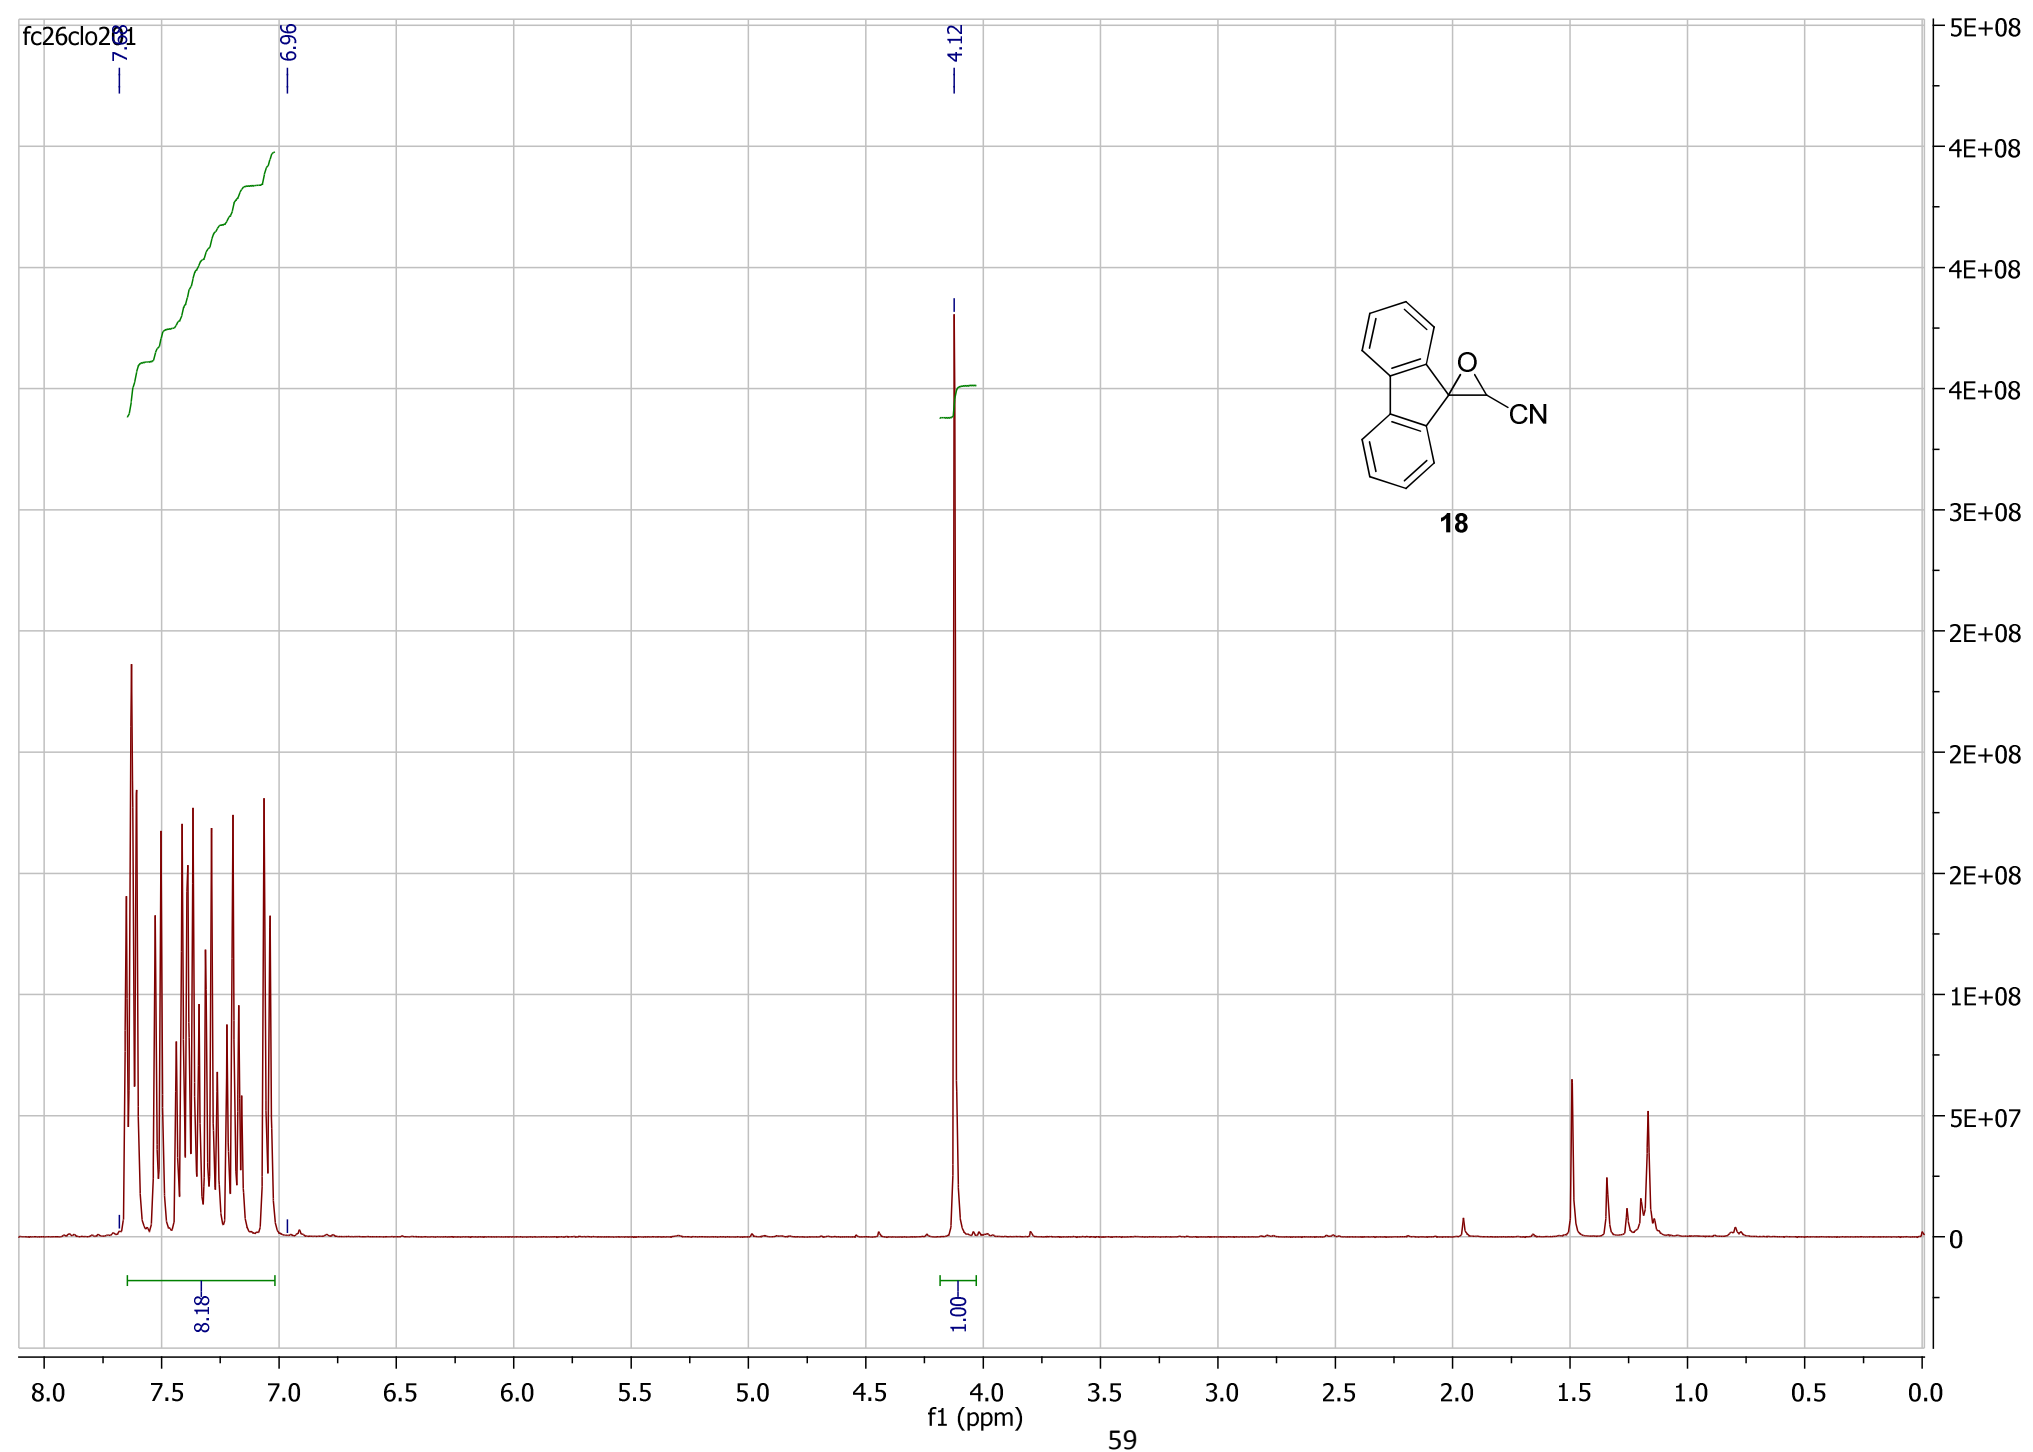

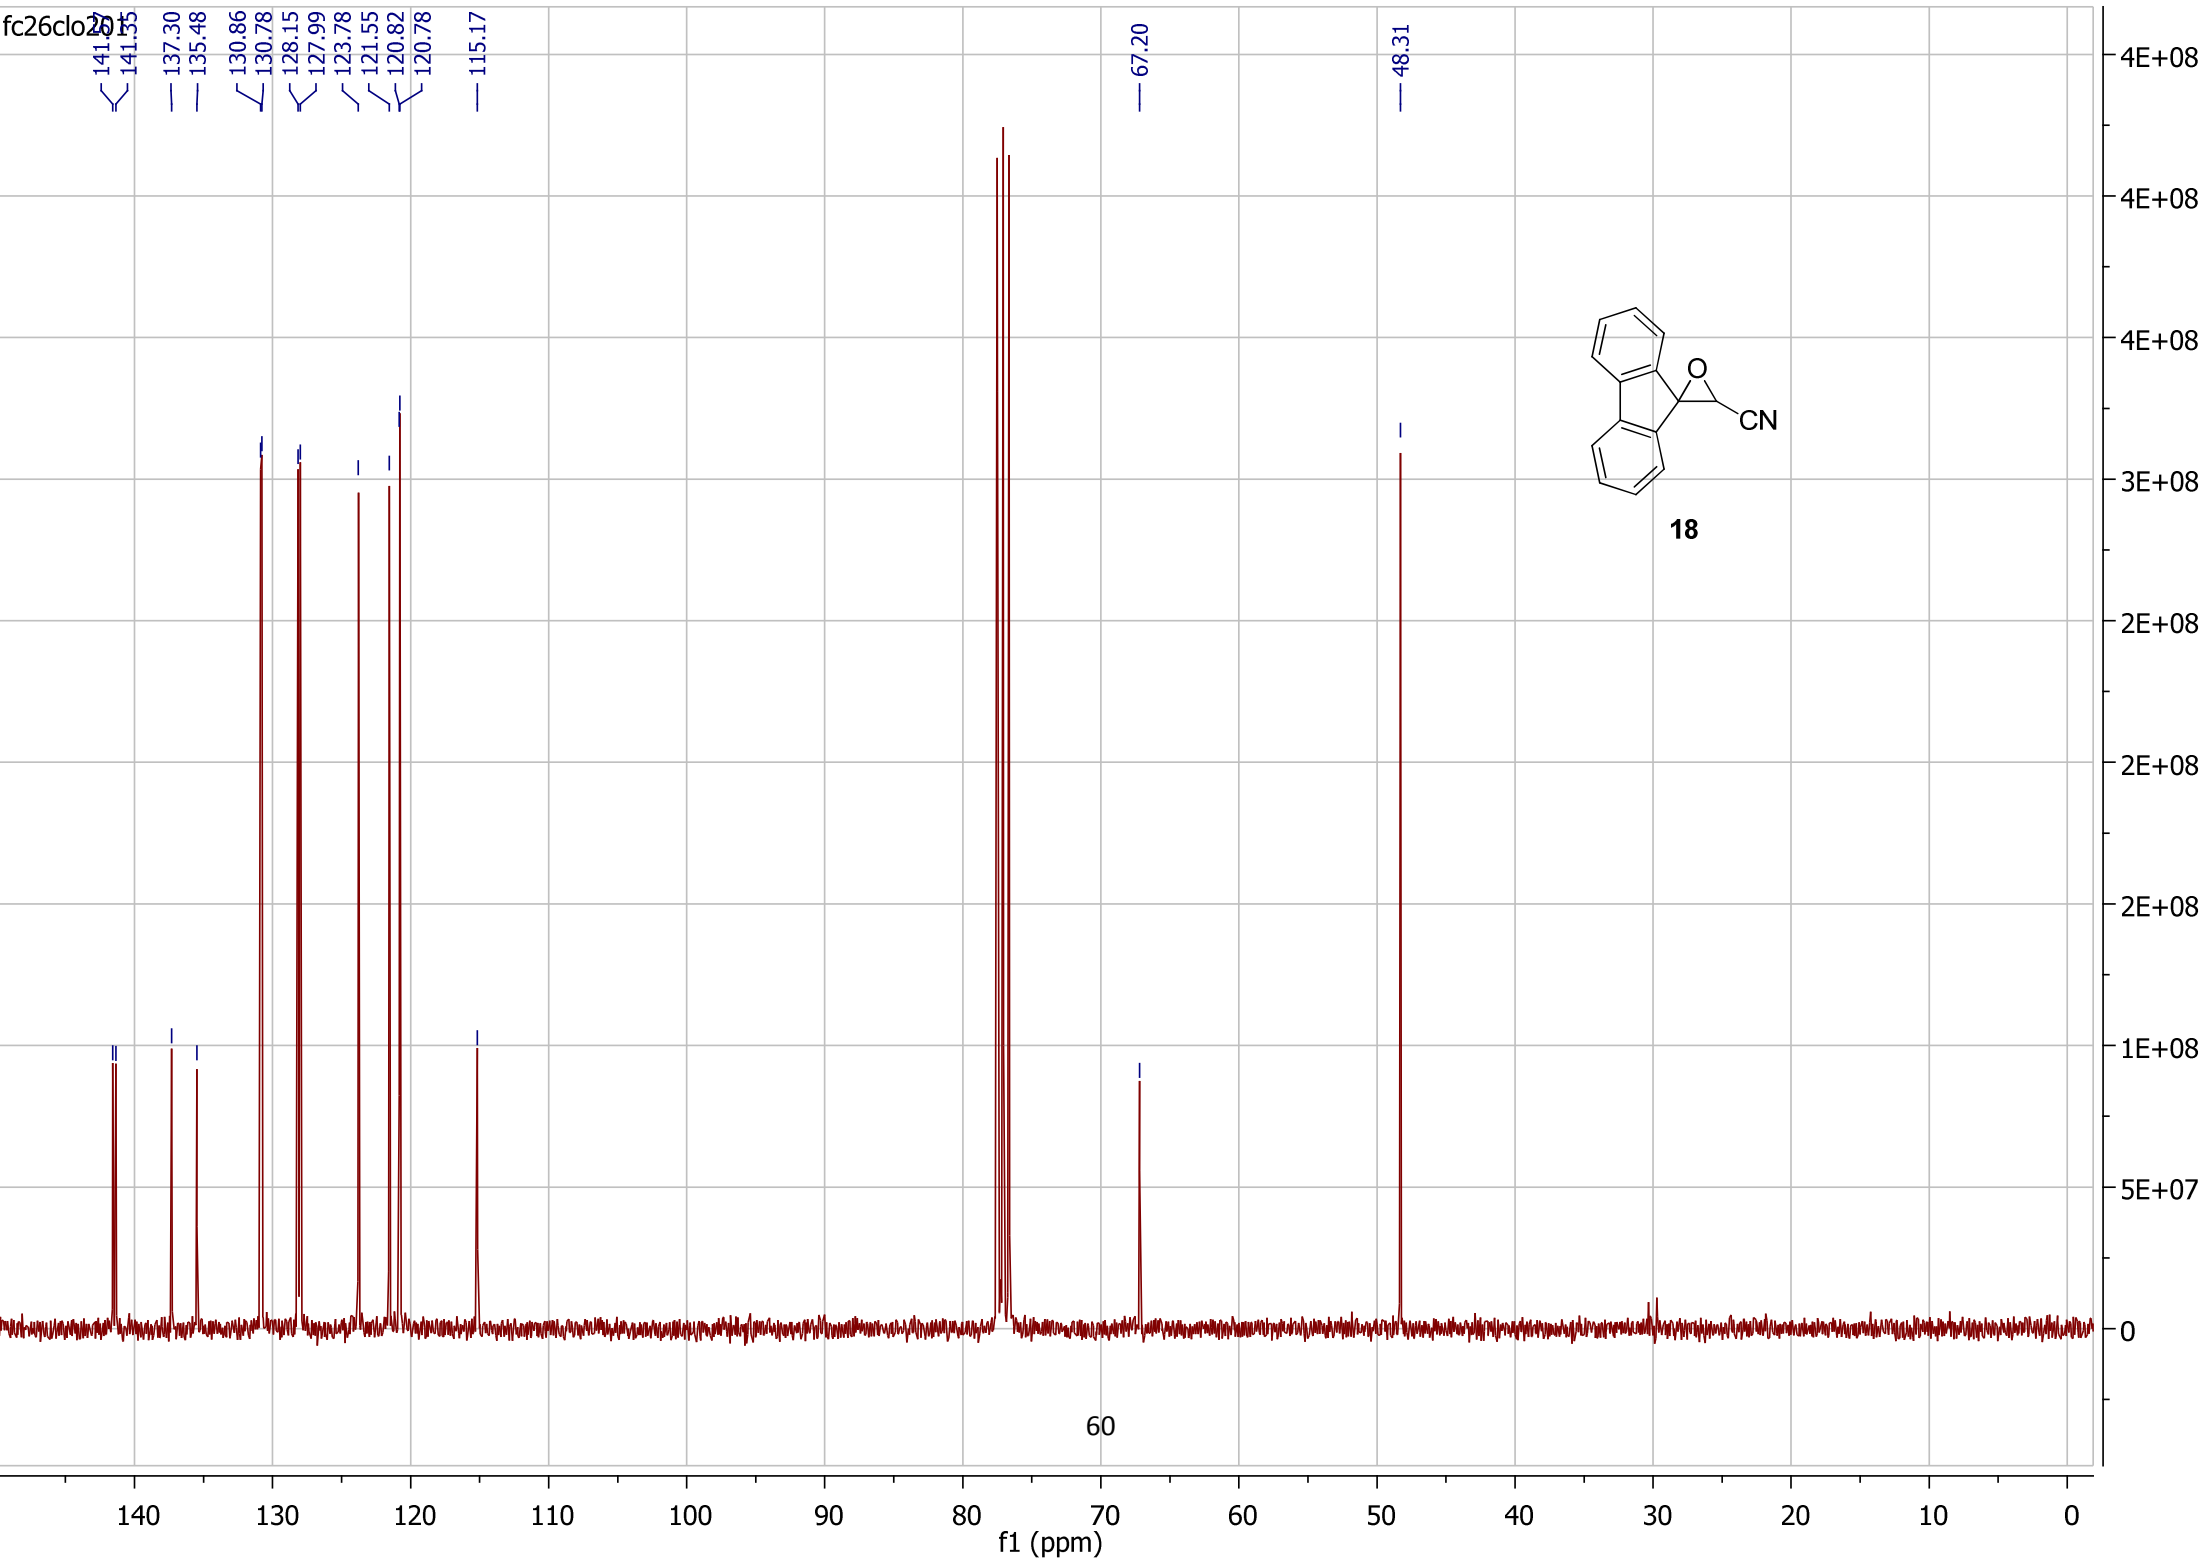

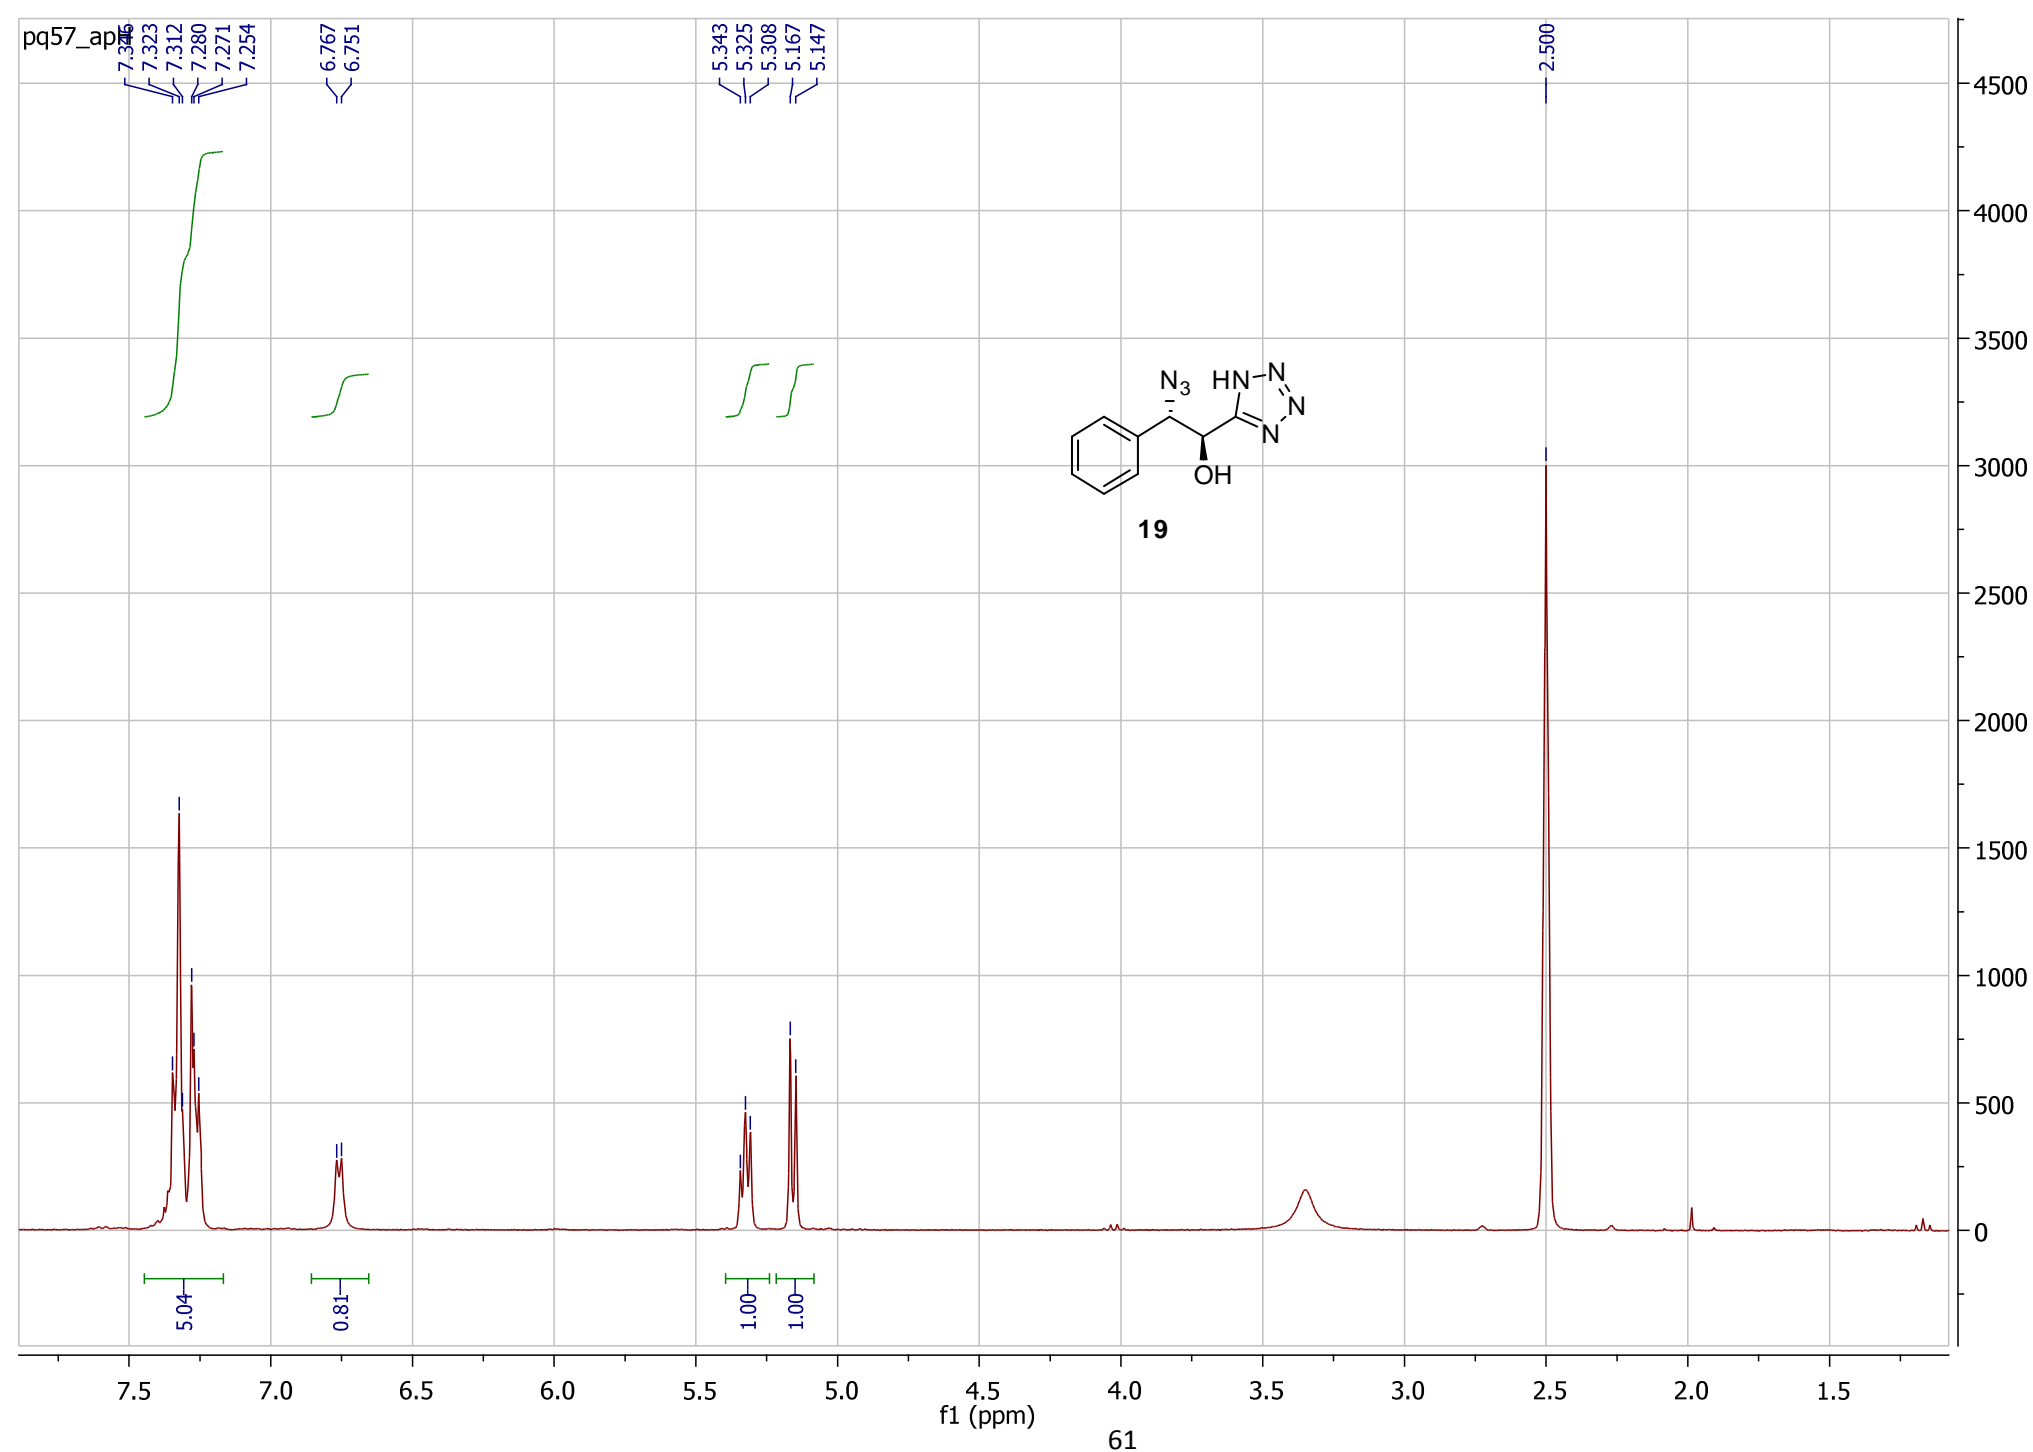

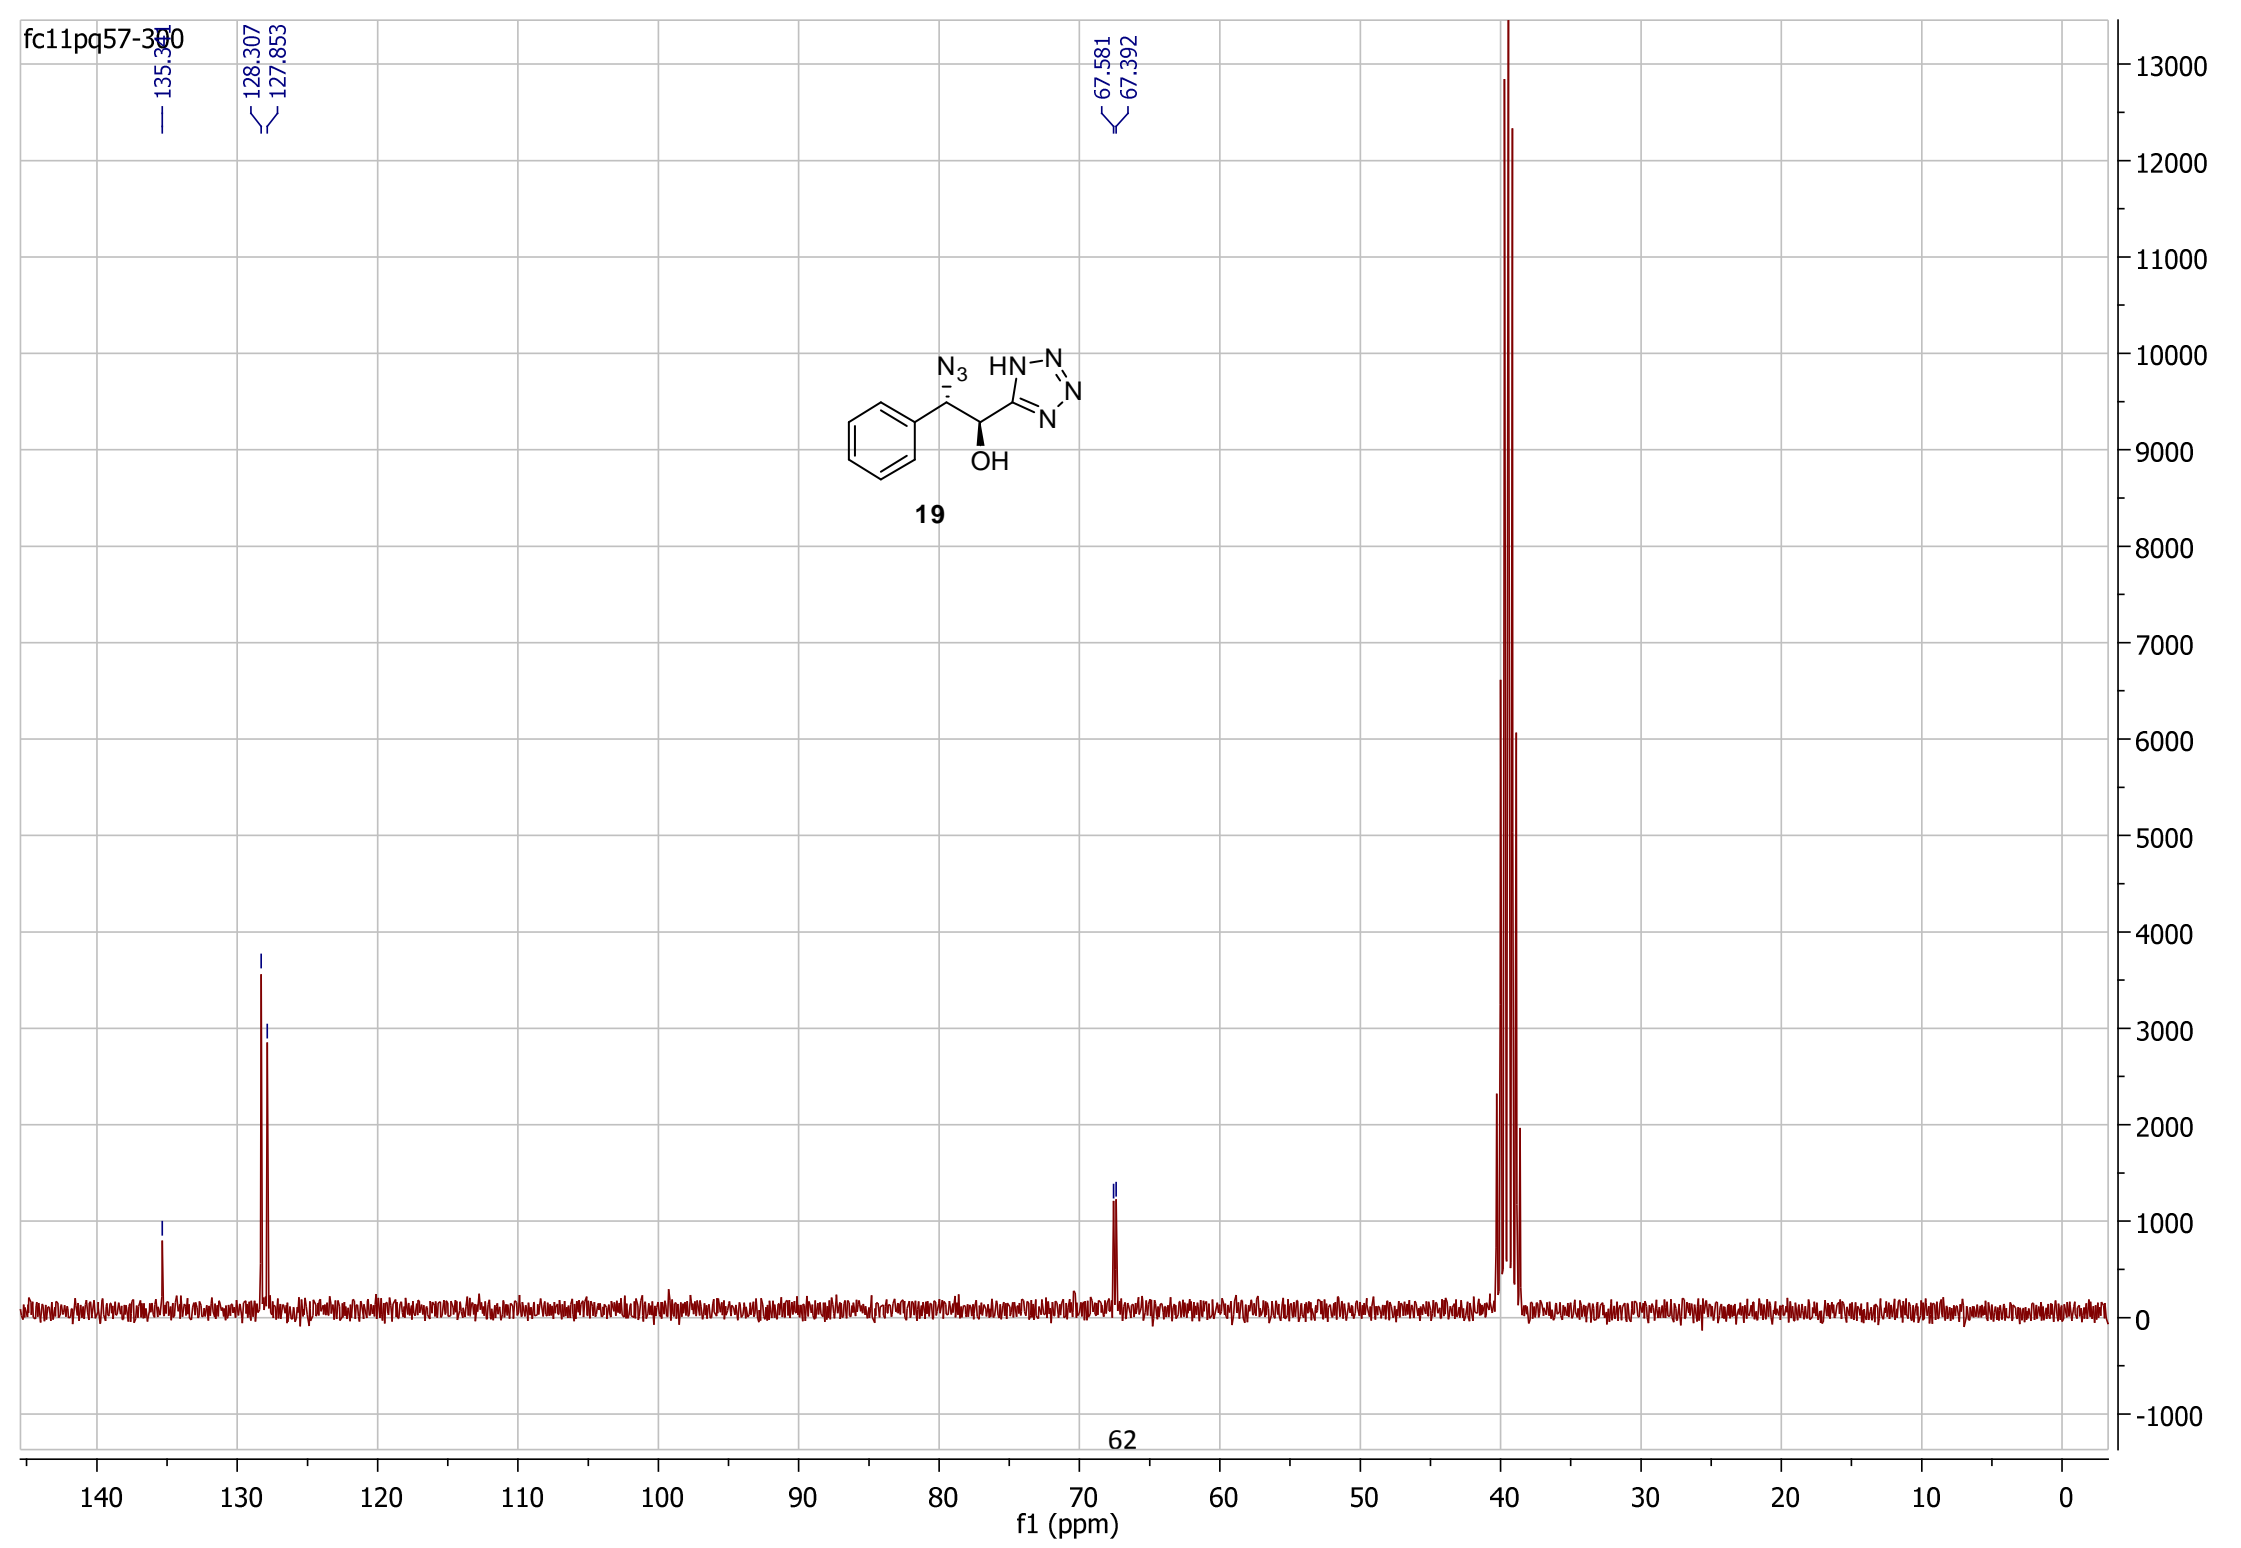

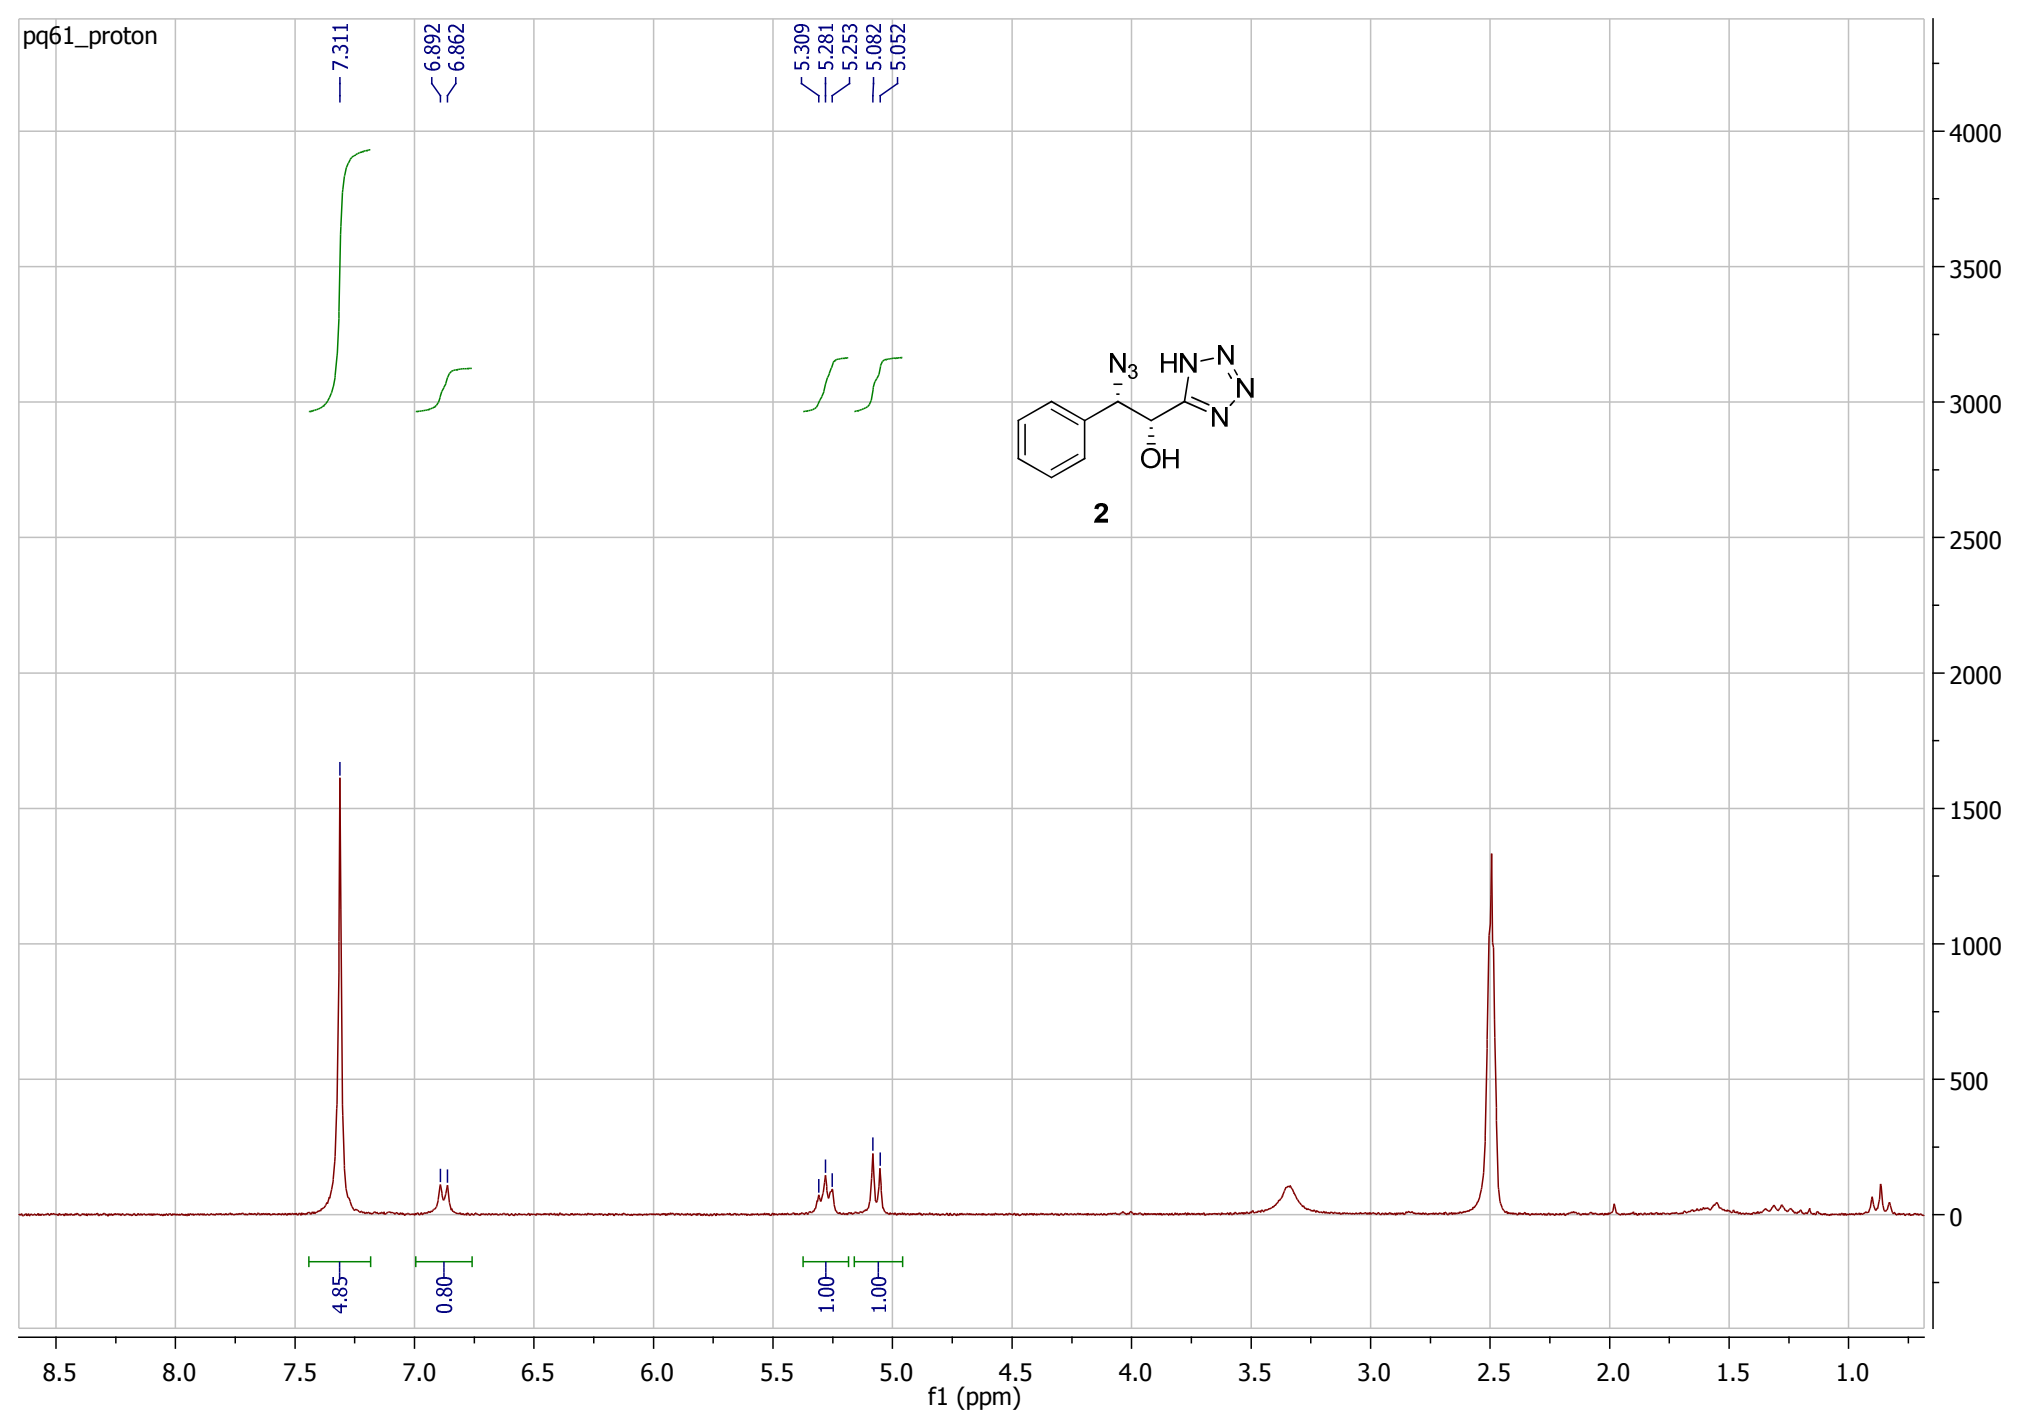

fc14pq61-300

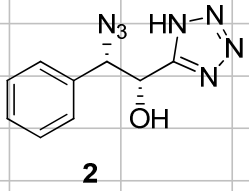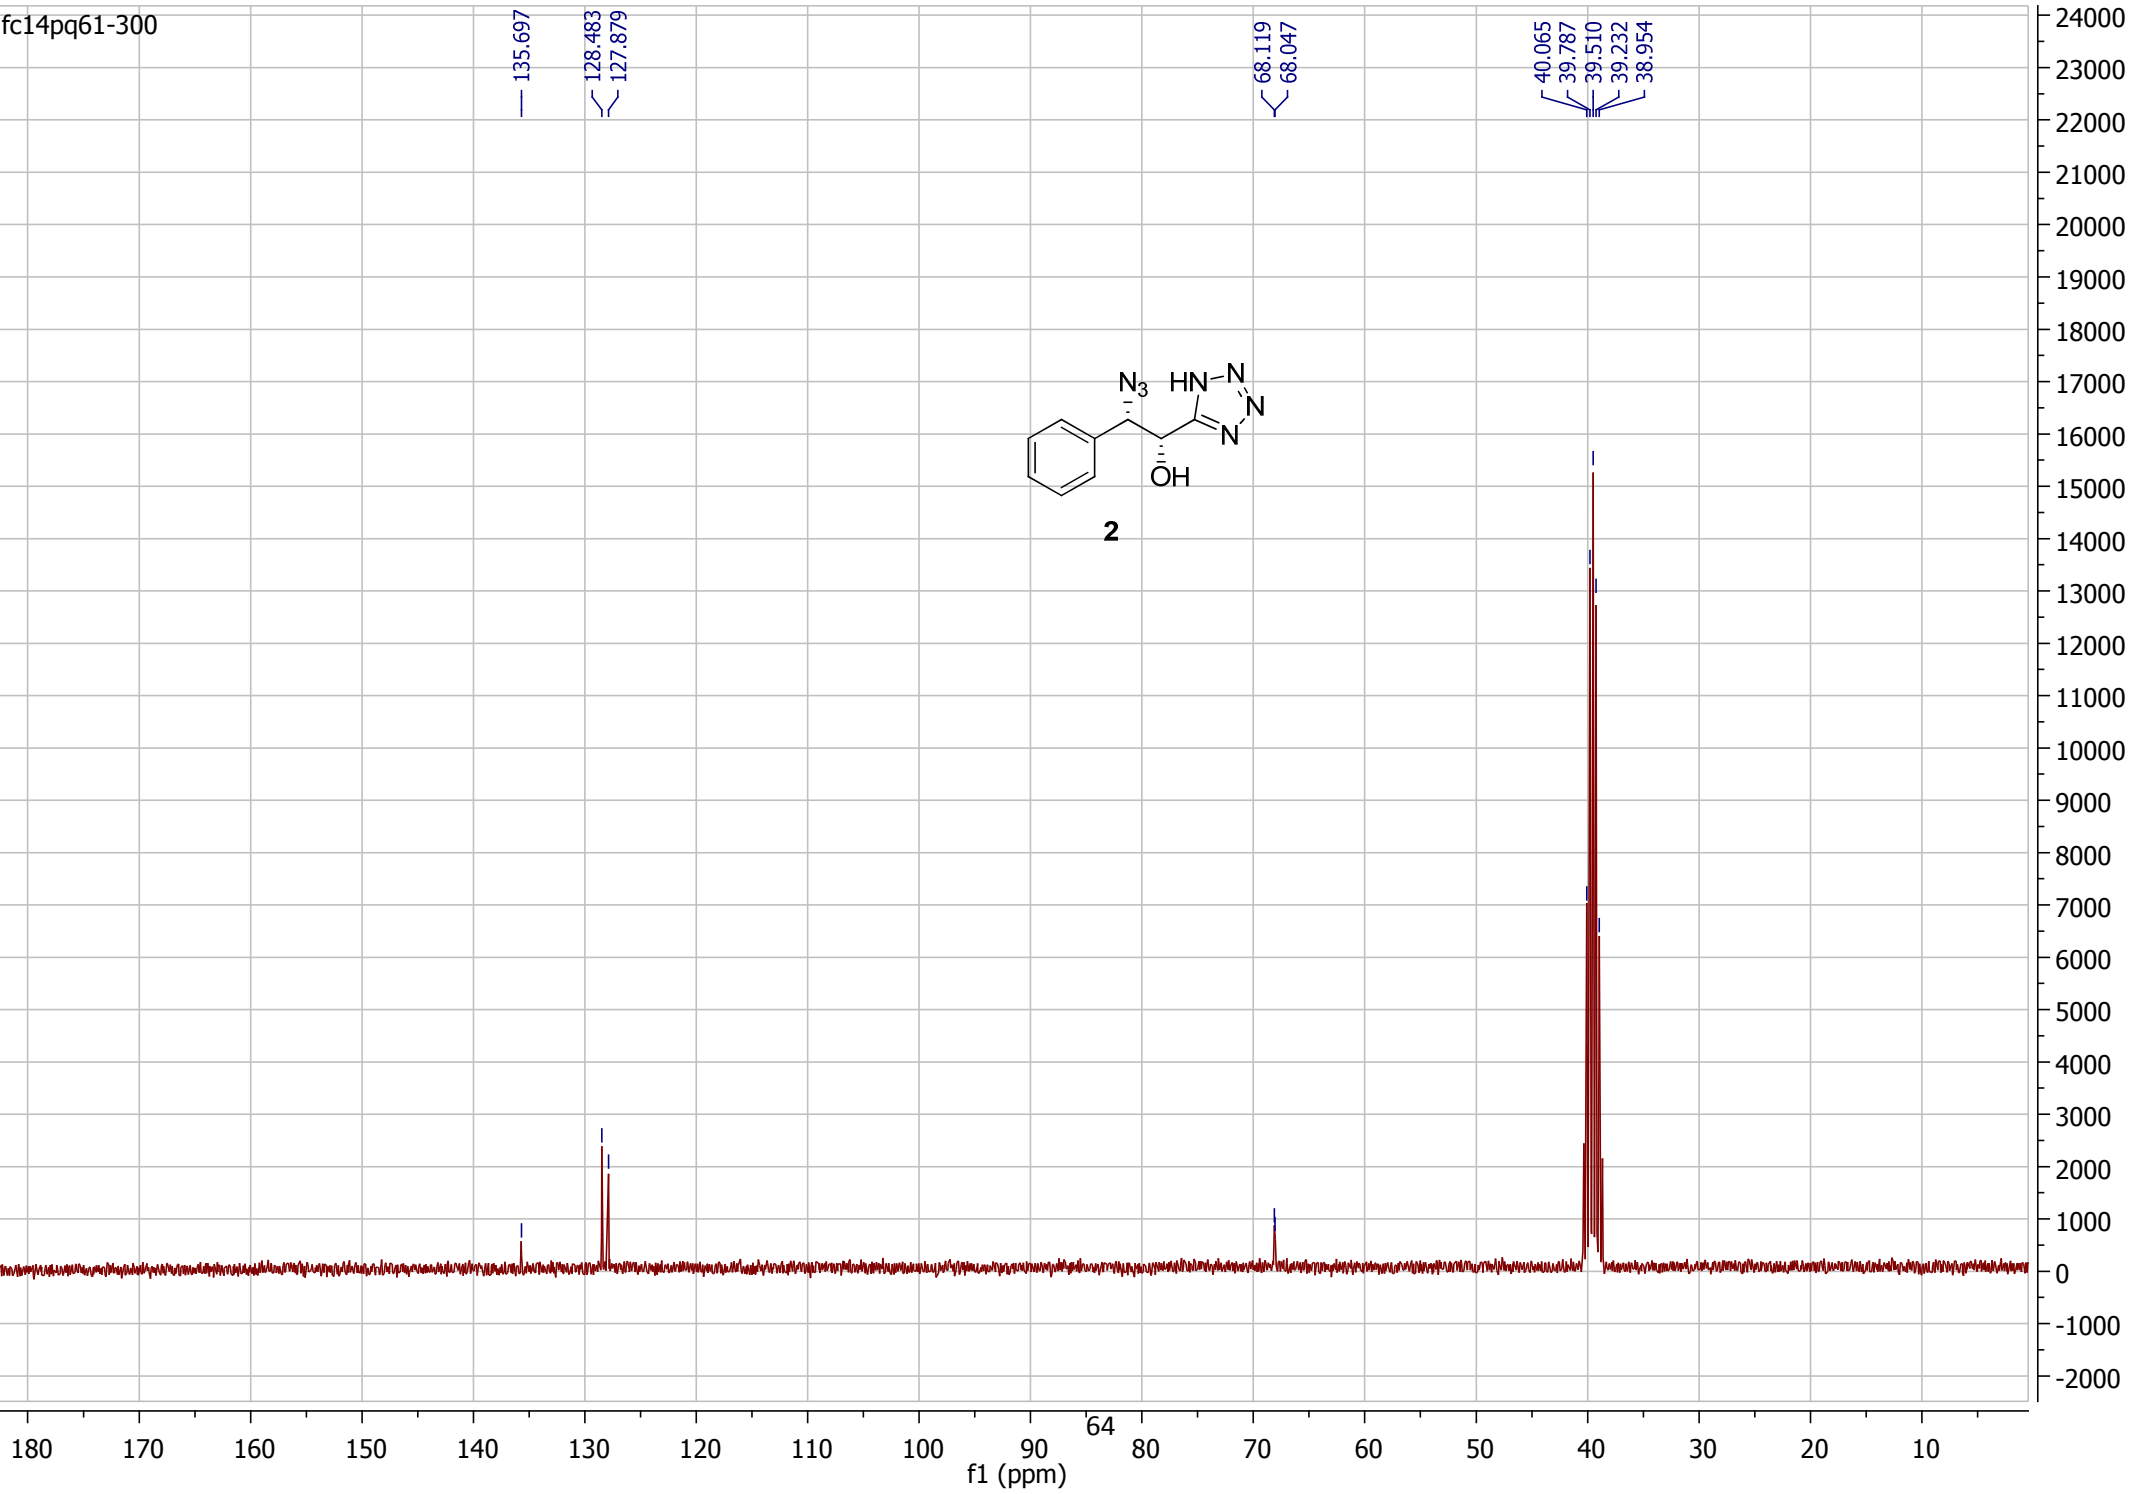



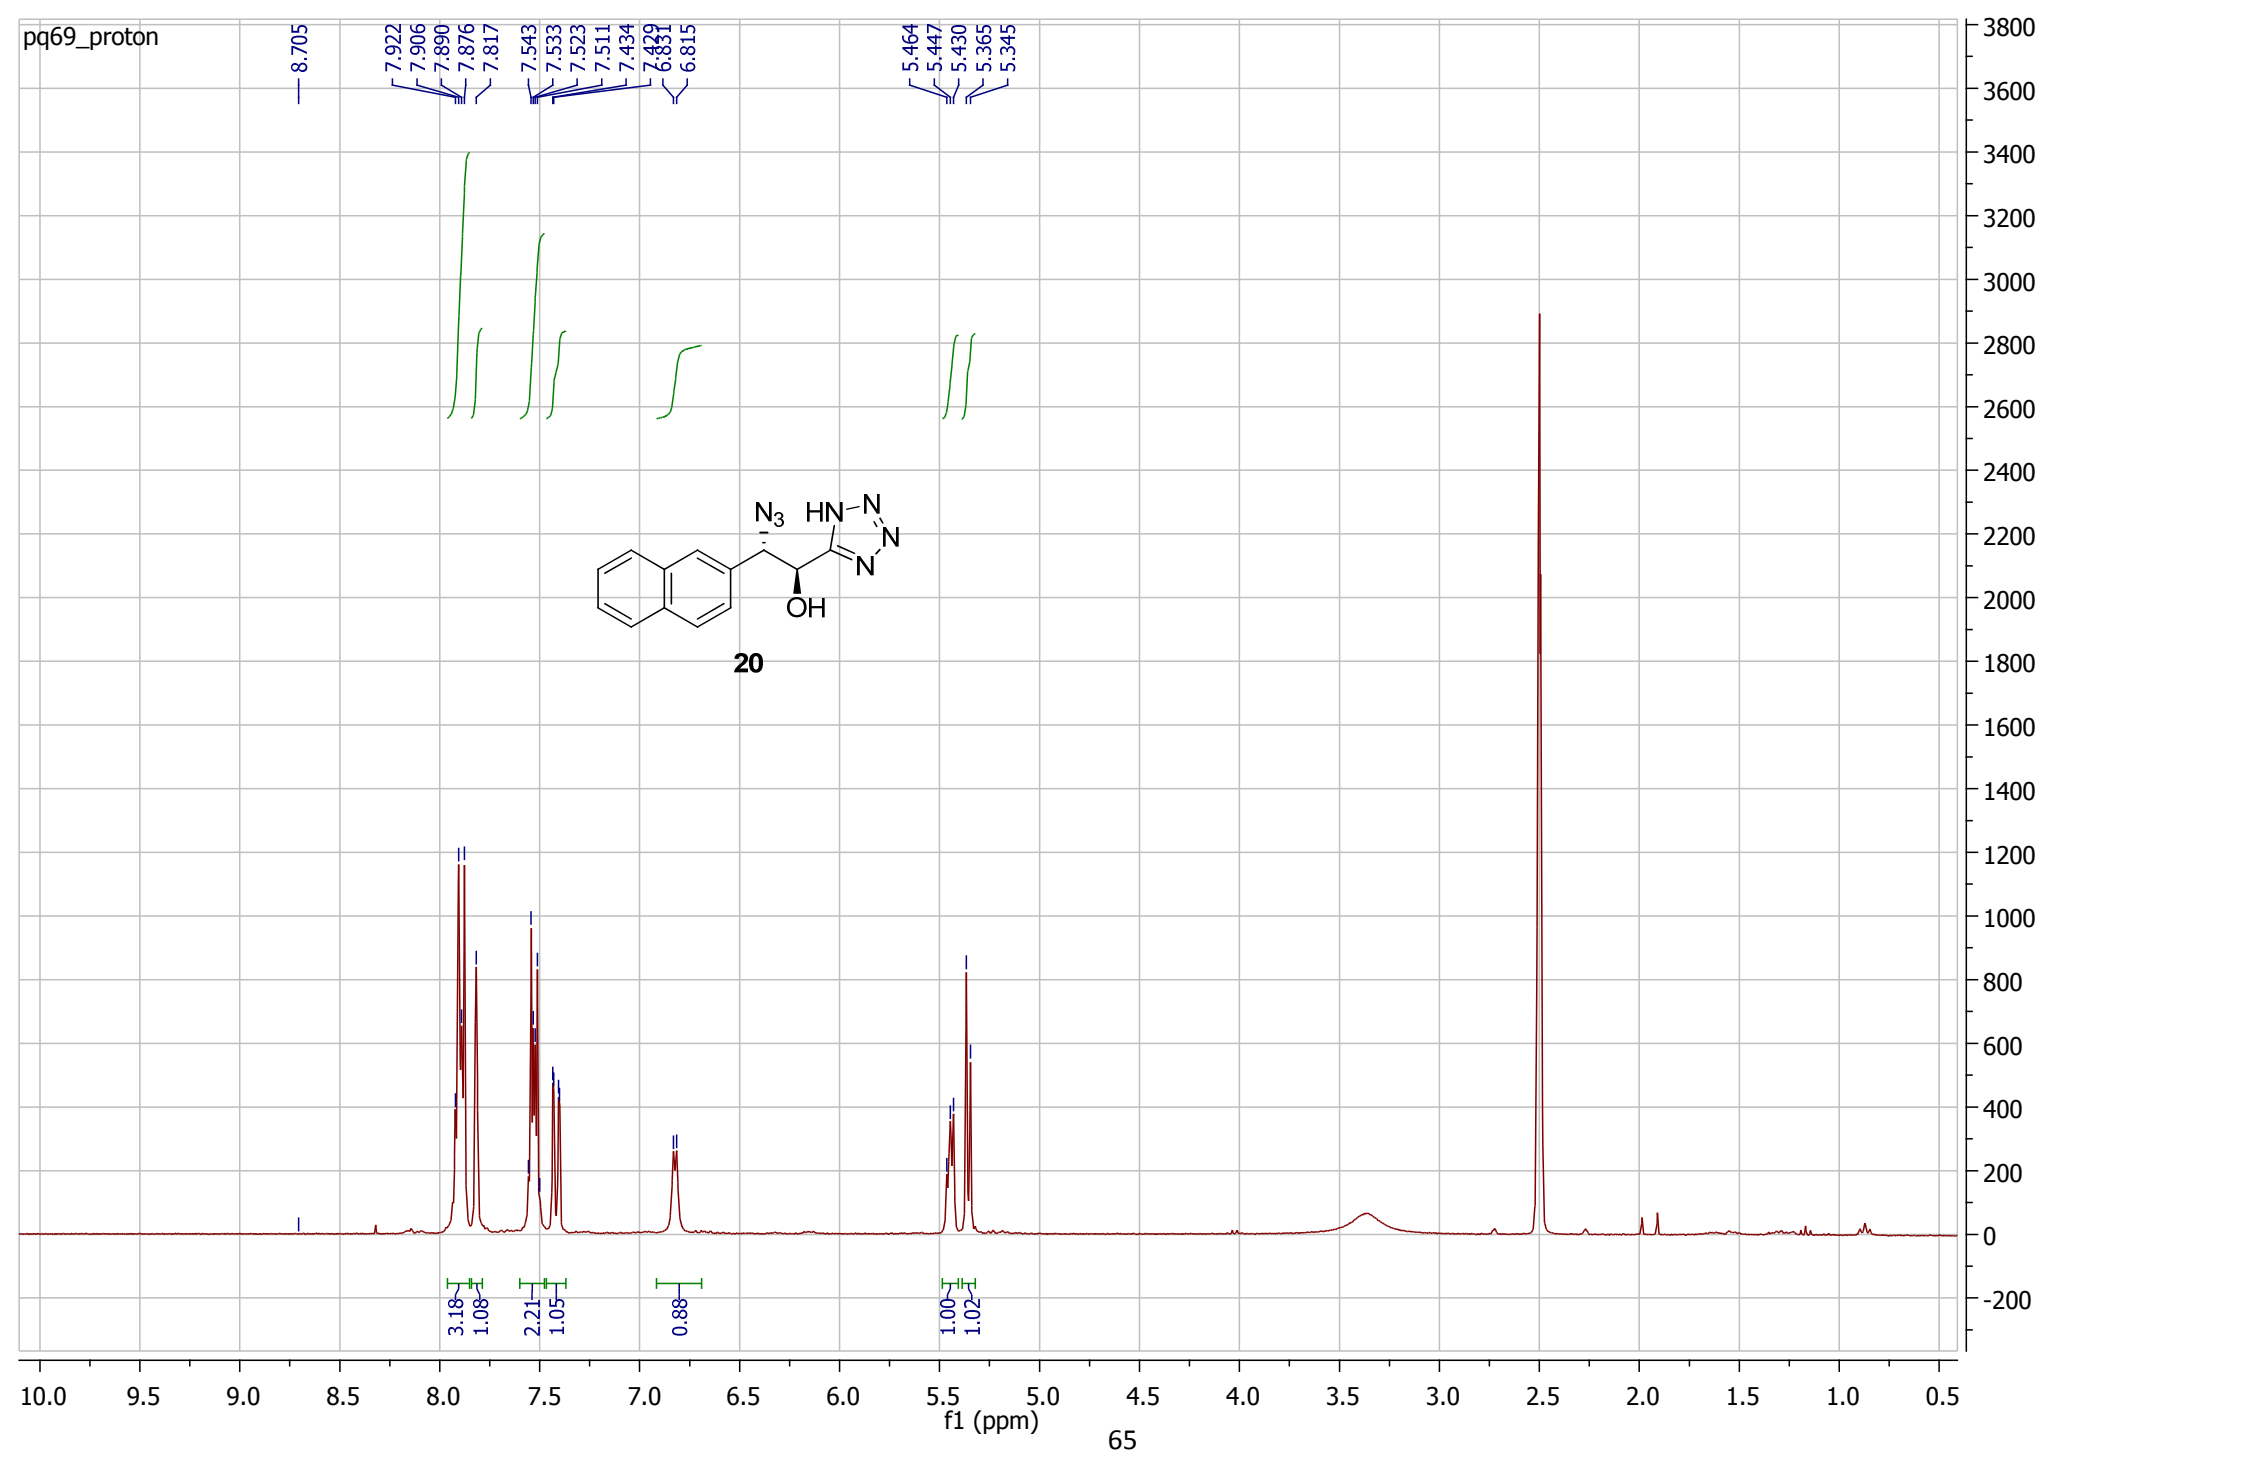

fc13pq69-300

132.945  
132.662  
132.442  
127.921  
127.504  
127.178  
126.416  
126.361  
125.310

67.782  
67.474

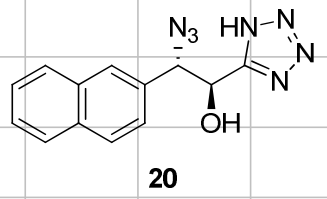

170 160 150 140 130 120 110 100 90 80 66 70 60 50 40 30 20 10 0

f1 (ppm)

18000  
17000  
16000  
15000  
14000  
13000  
12000  
11000  
10000  
9000  
8000  
7000  
6000  
5000  
4000  
3000  
2000  
1000  
0  
-1000

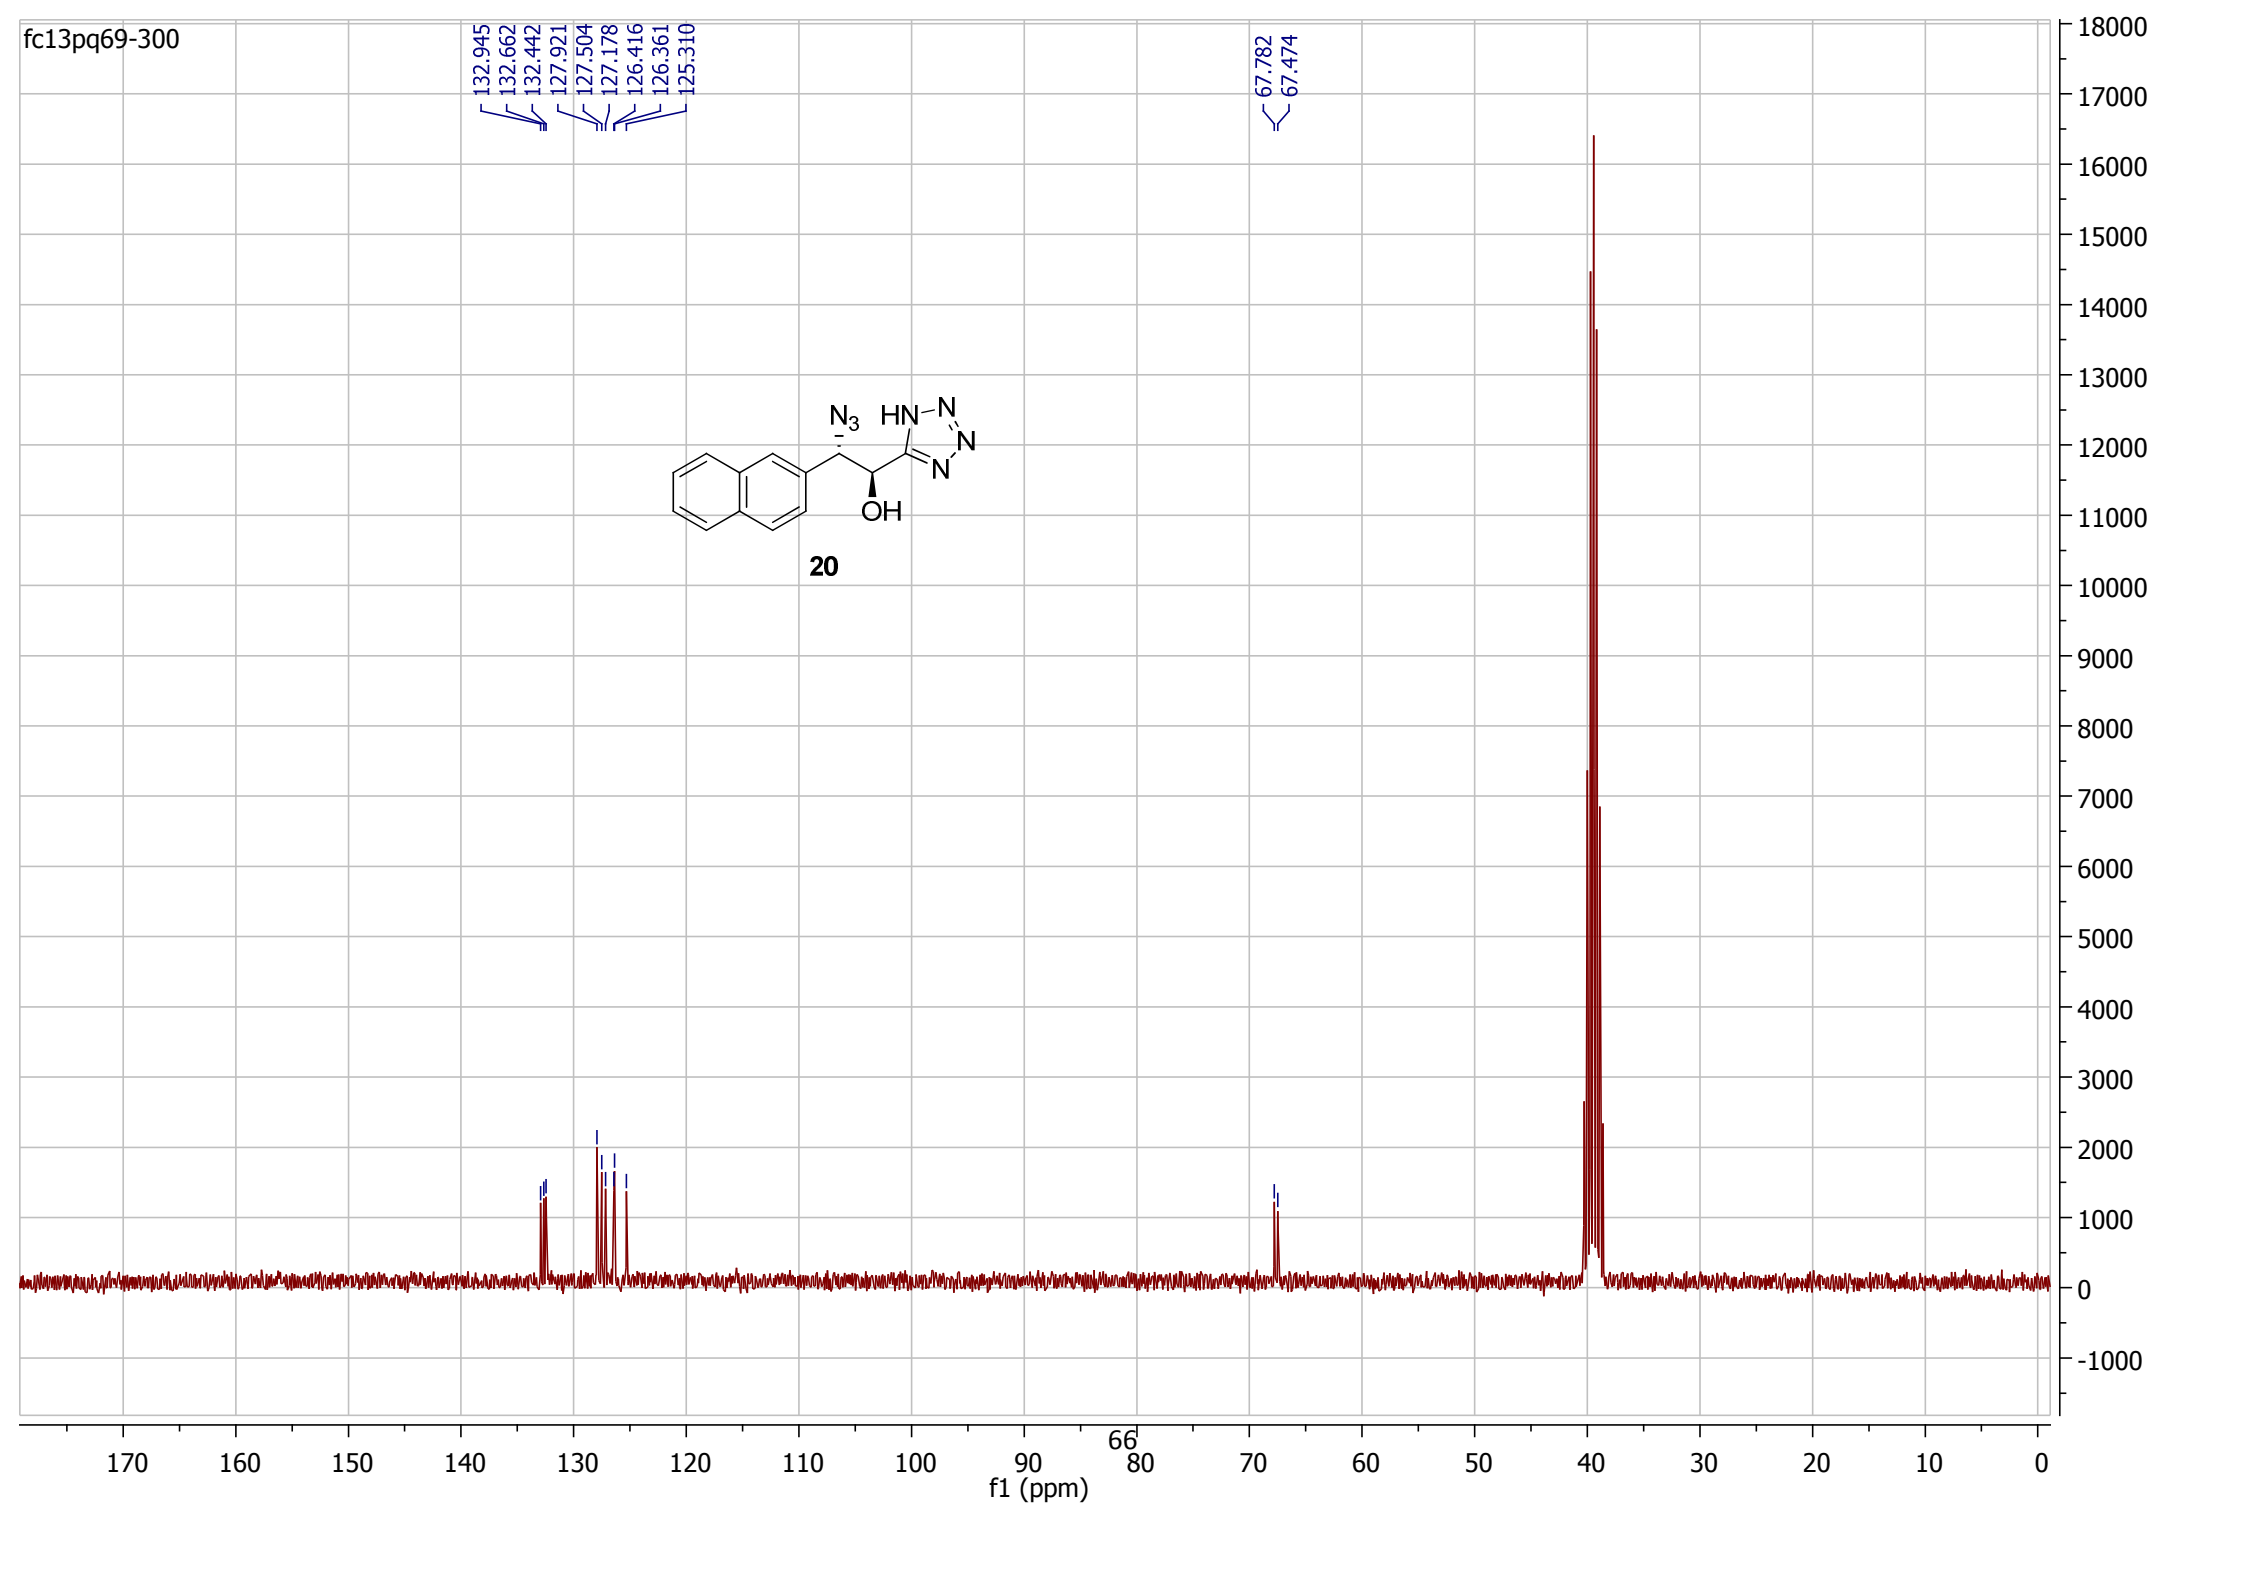

pq70\_proton

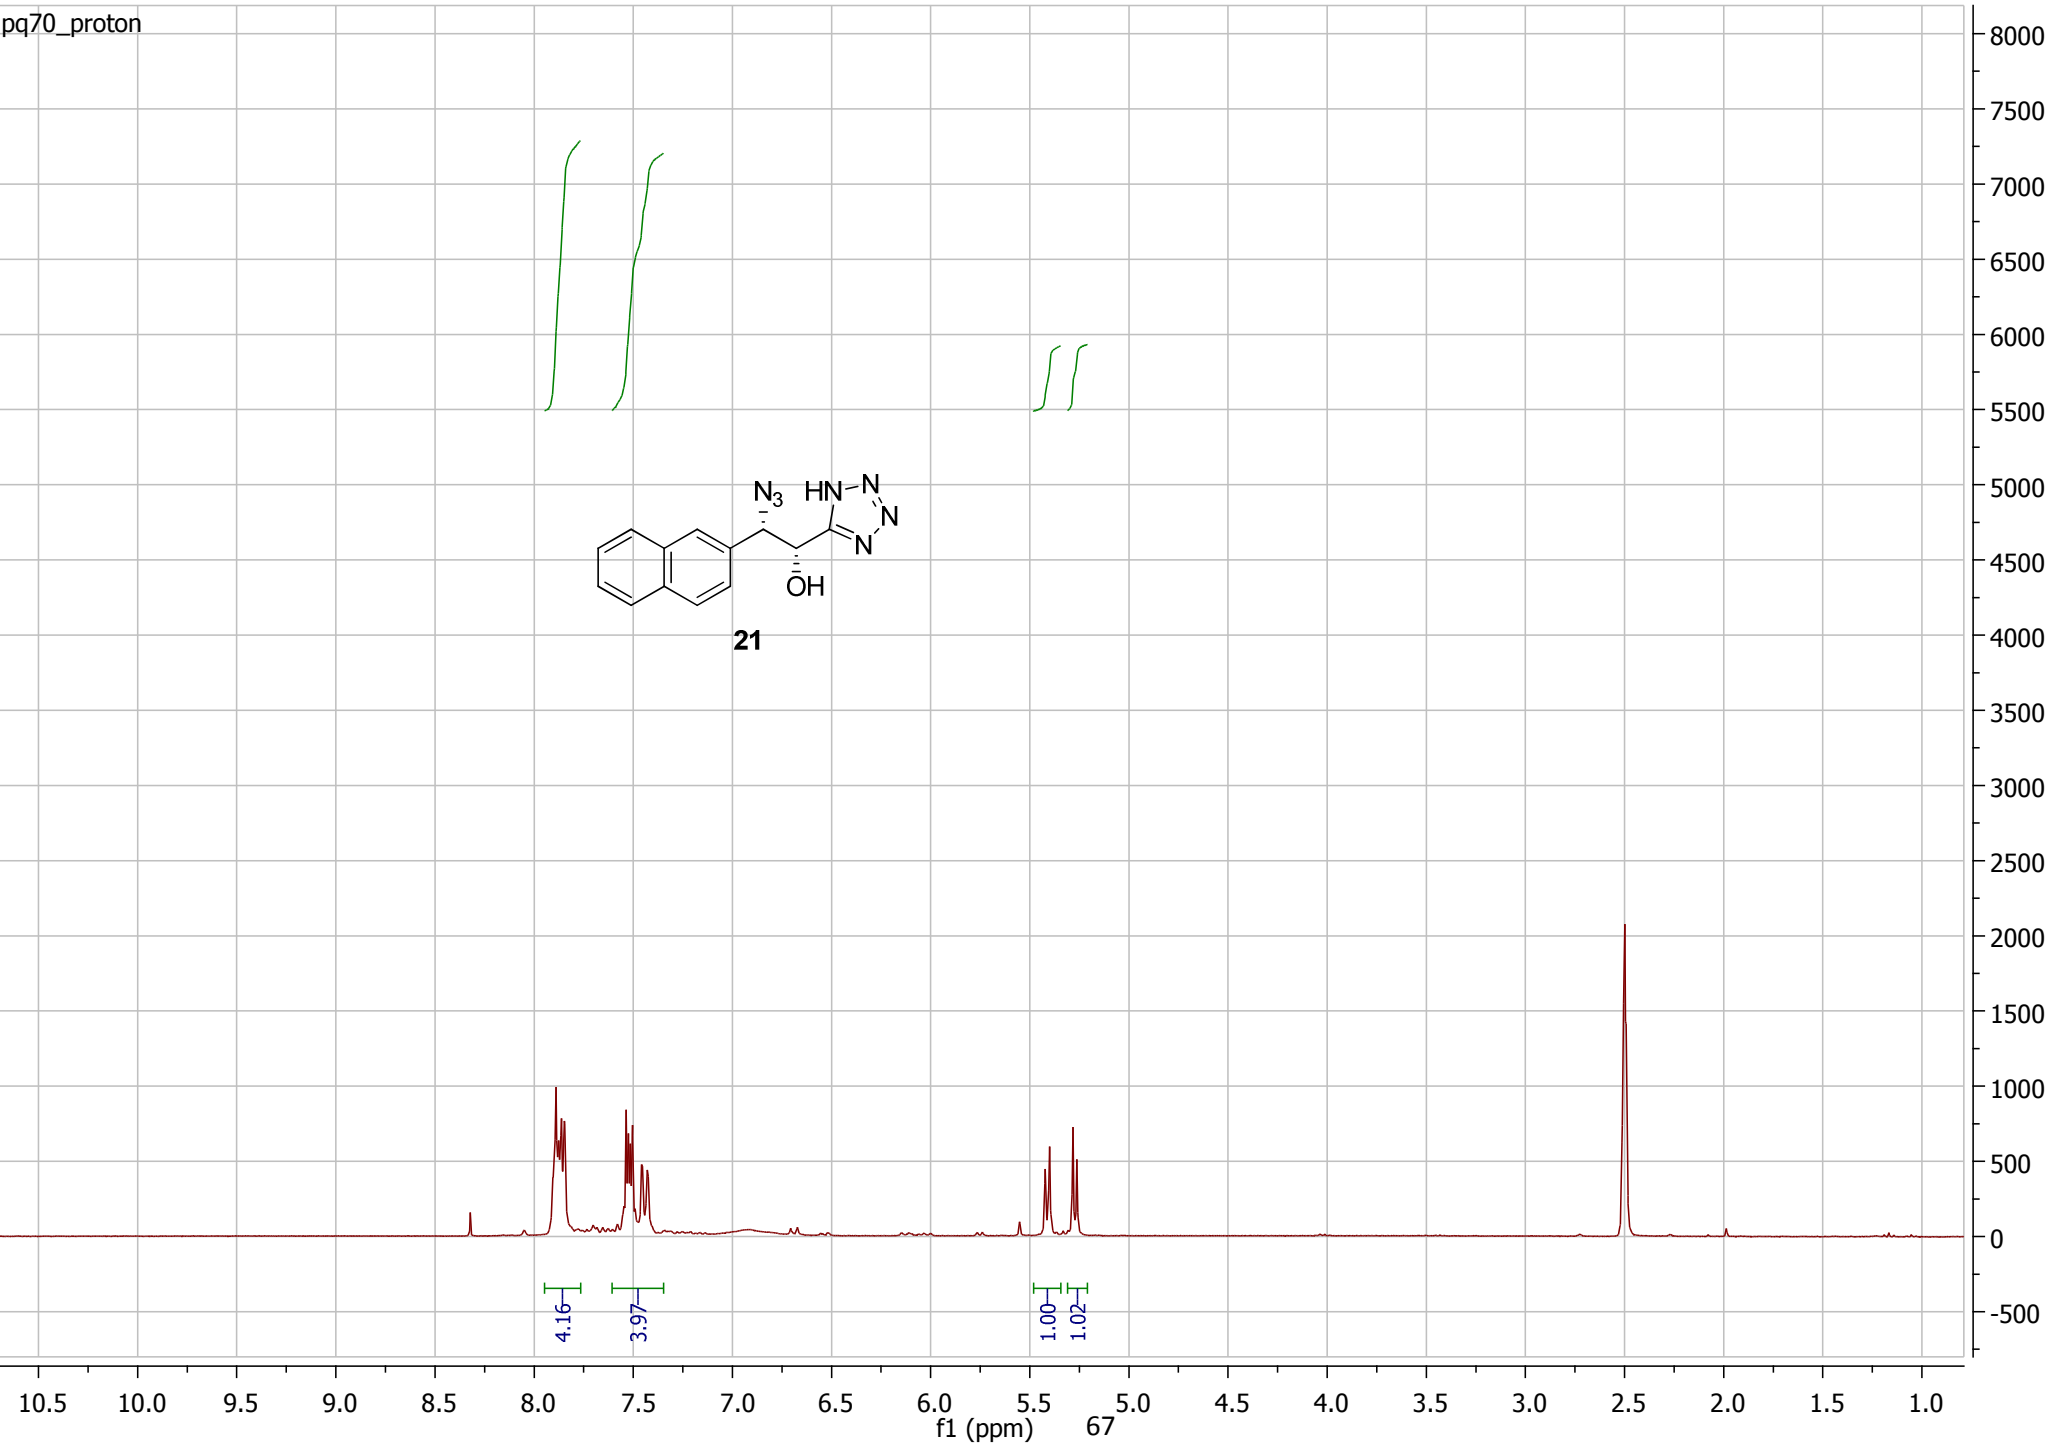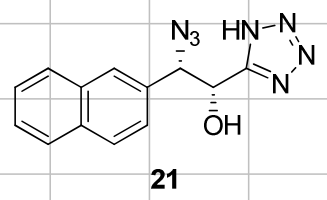

4.16  
3.97

1.00  
1.02

f1 (ppm) 67

fc13pq70-300

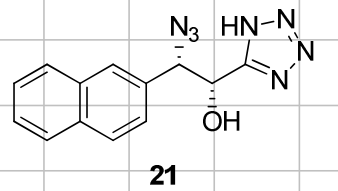

156.914  
133.265  
132.638  
132.437  
128.020  
127.909  
127.508  
127.050  
126.464  
126.394  
125.348  
68.348  
68.110

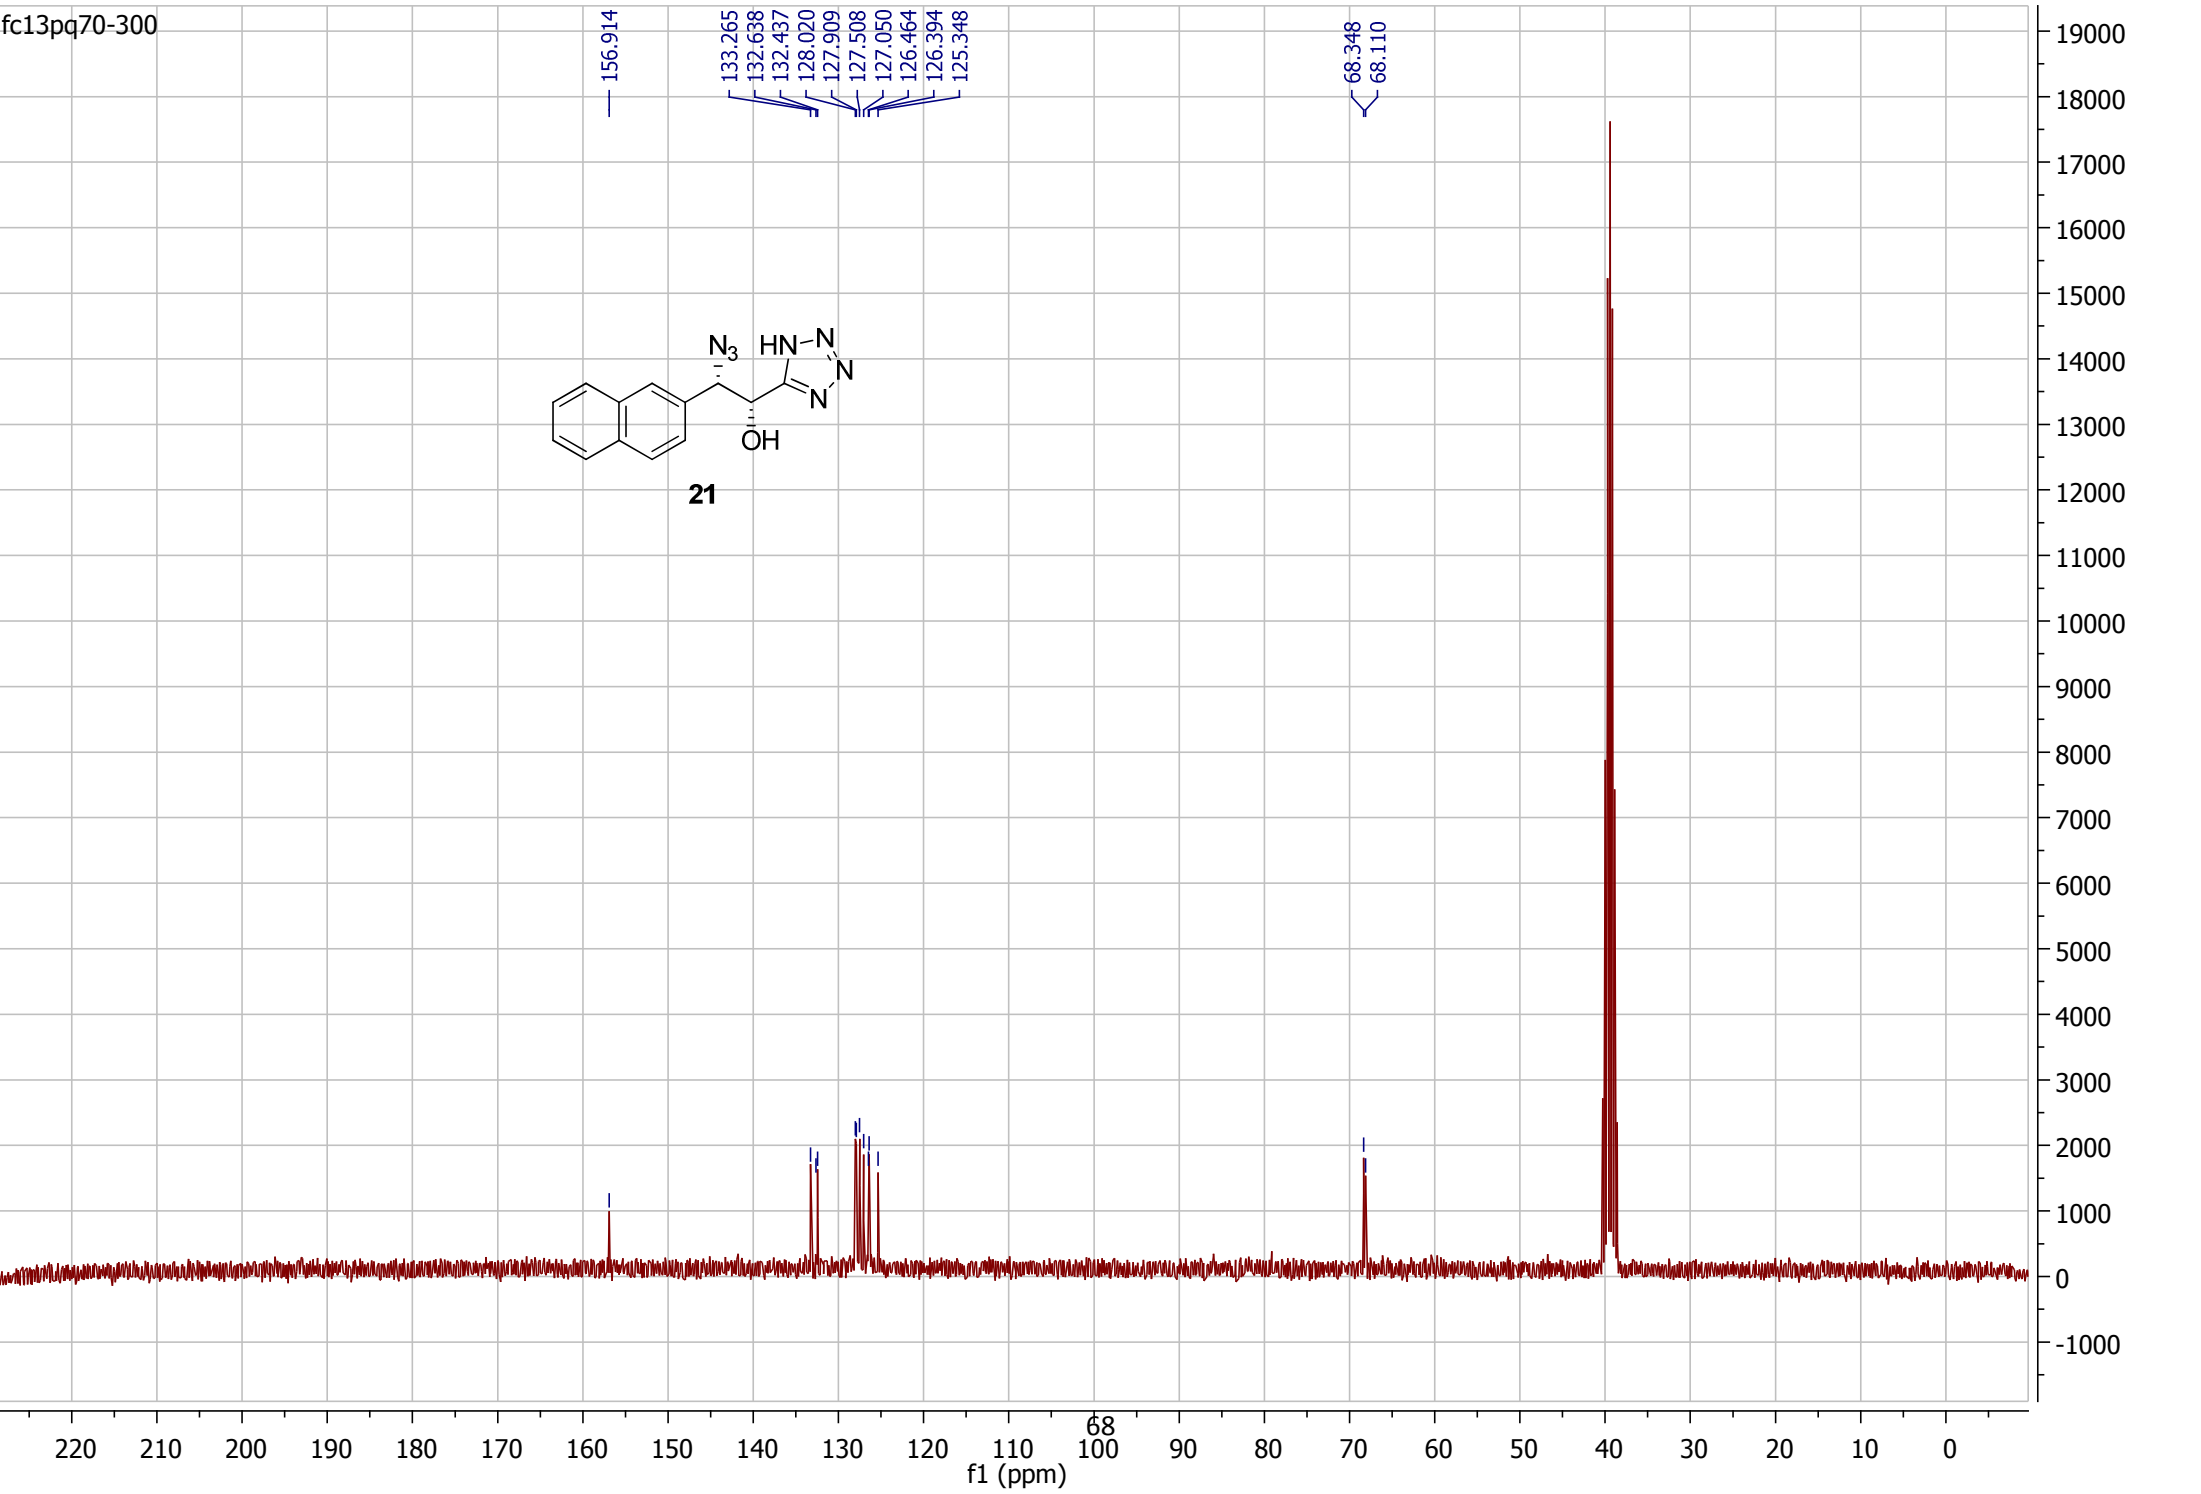

f1 (ppm)

fc13ppq71

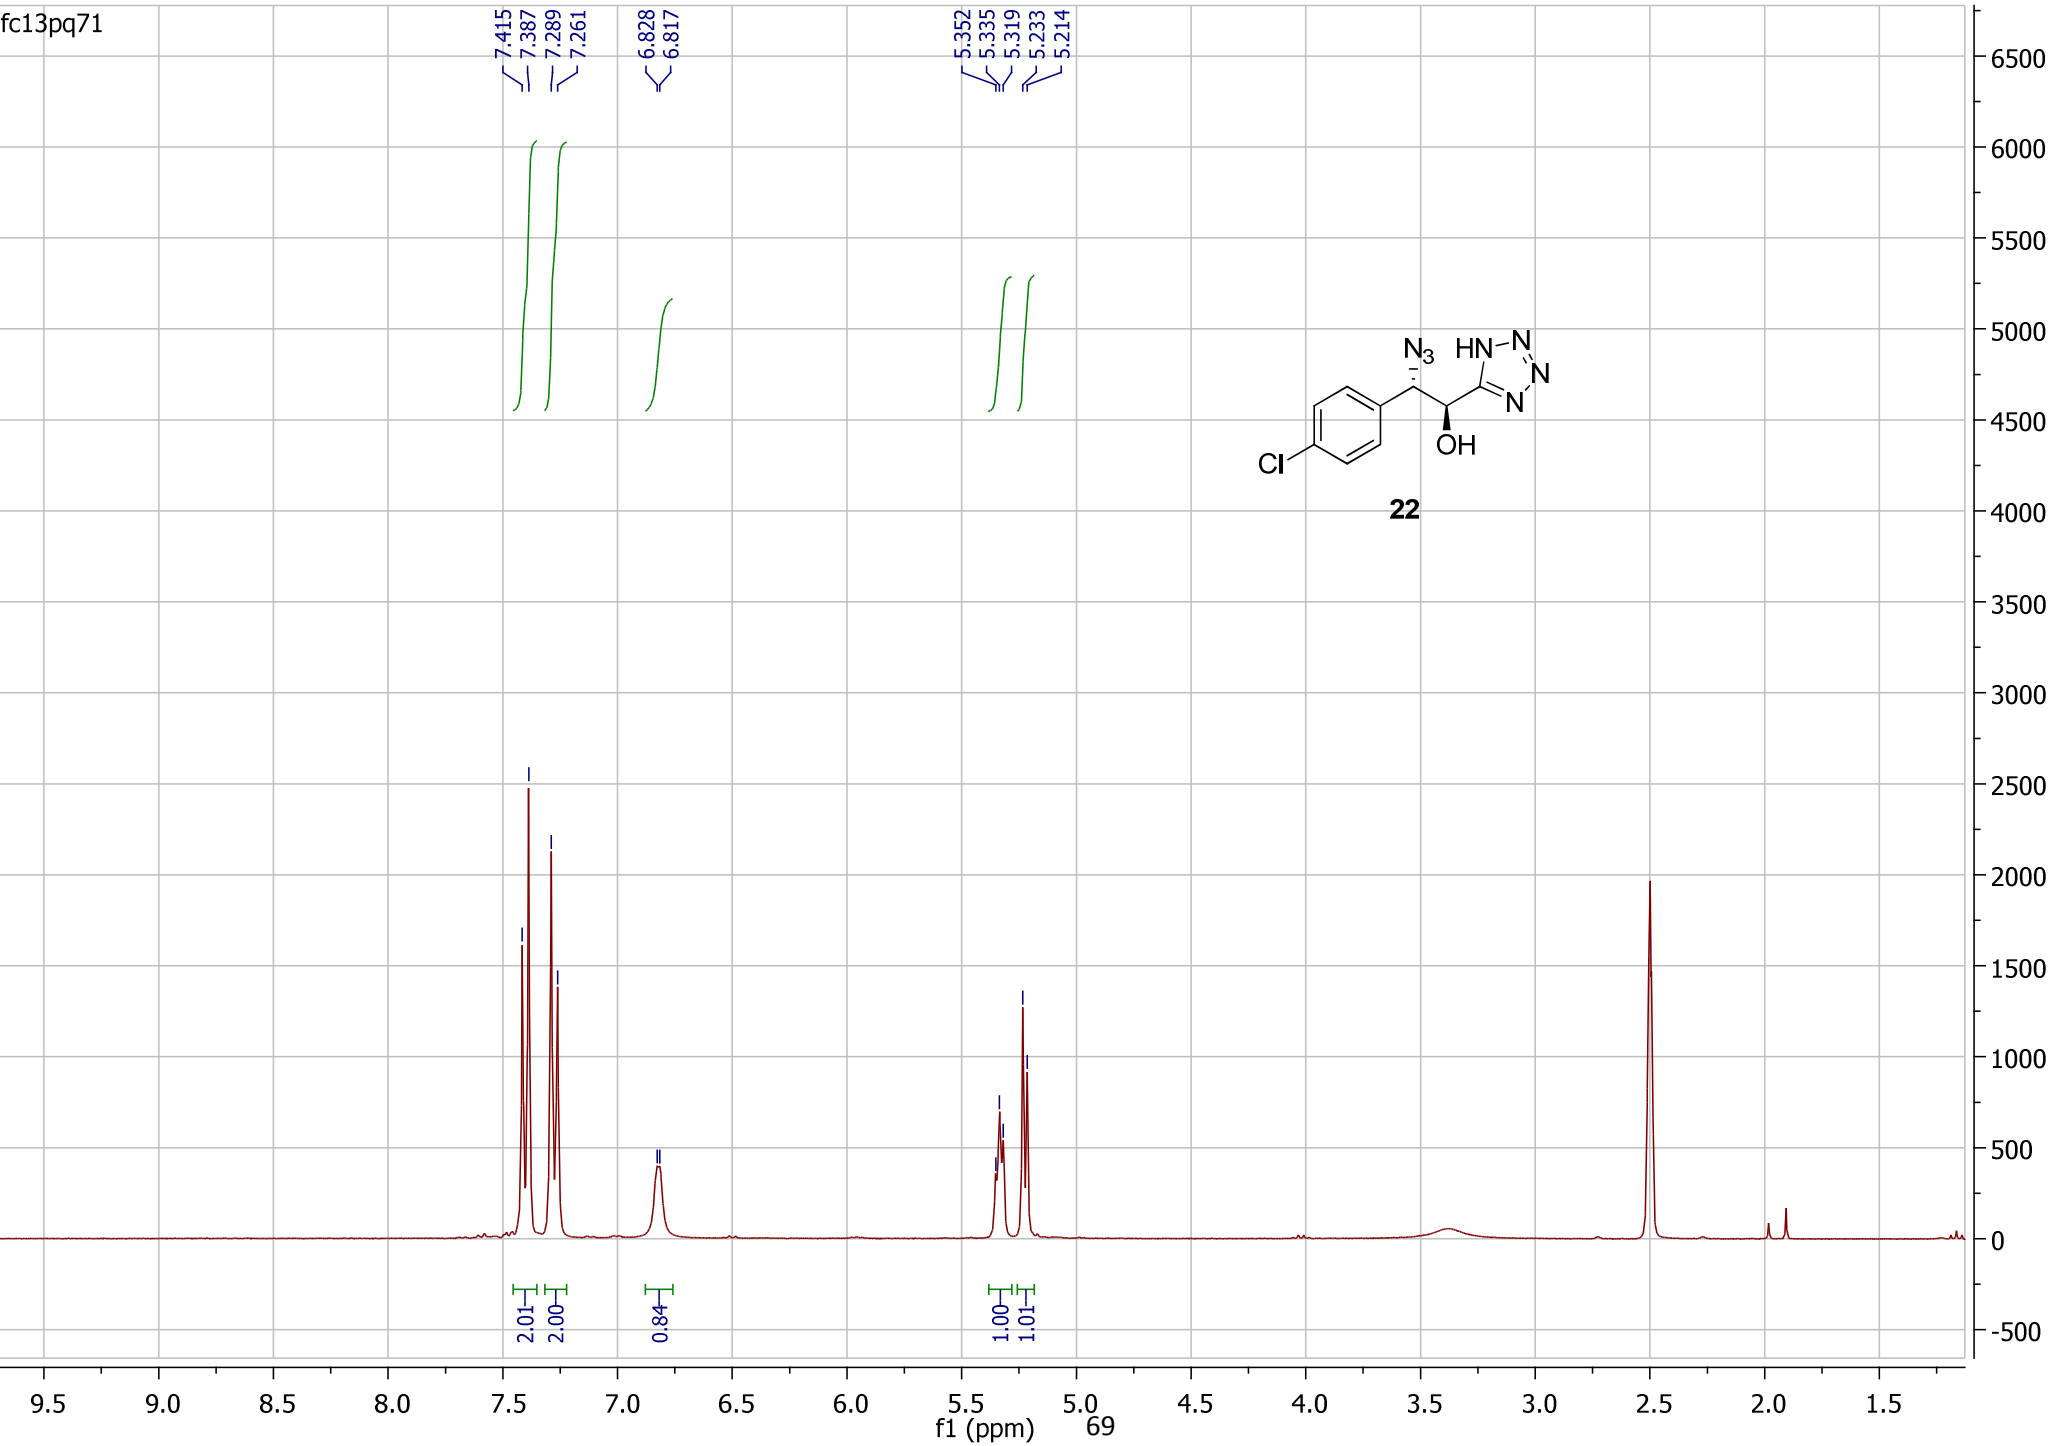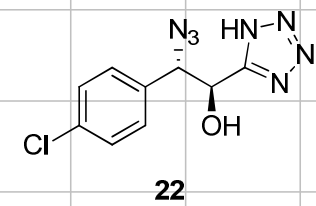

f1 (ppm) 69

fc13pq71-300

134.368  
132.934  
129.715  
128.272

67.434  
66.752

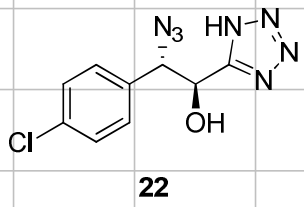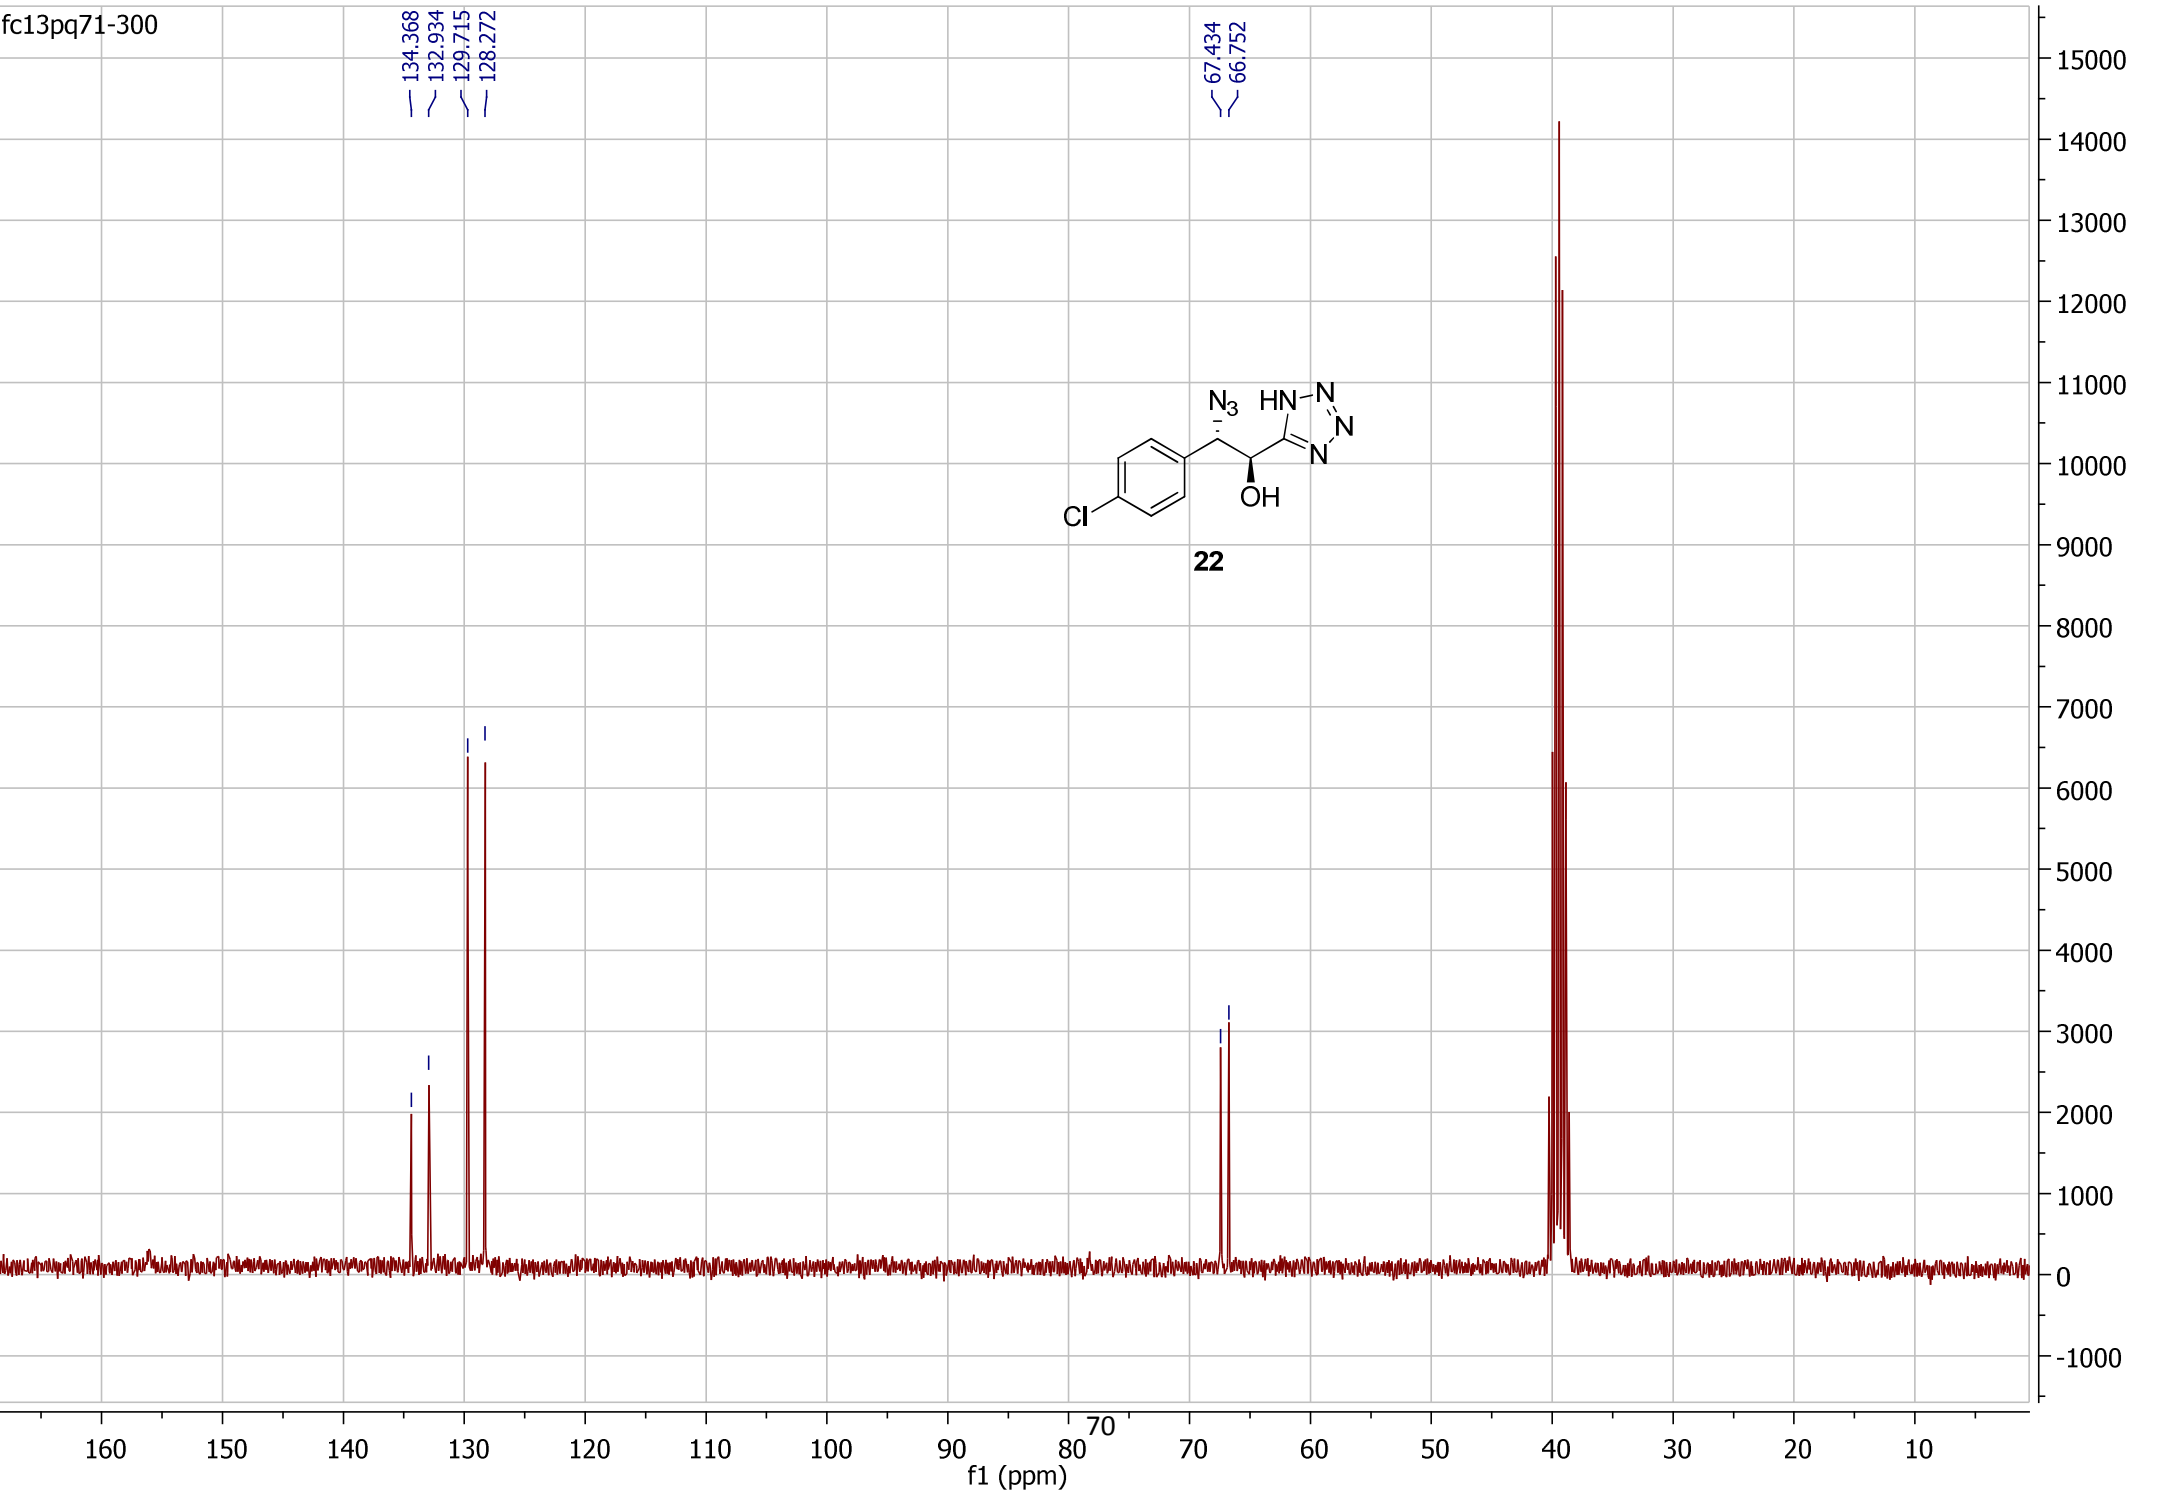

fc13pq72

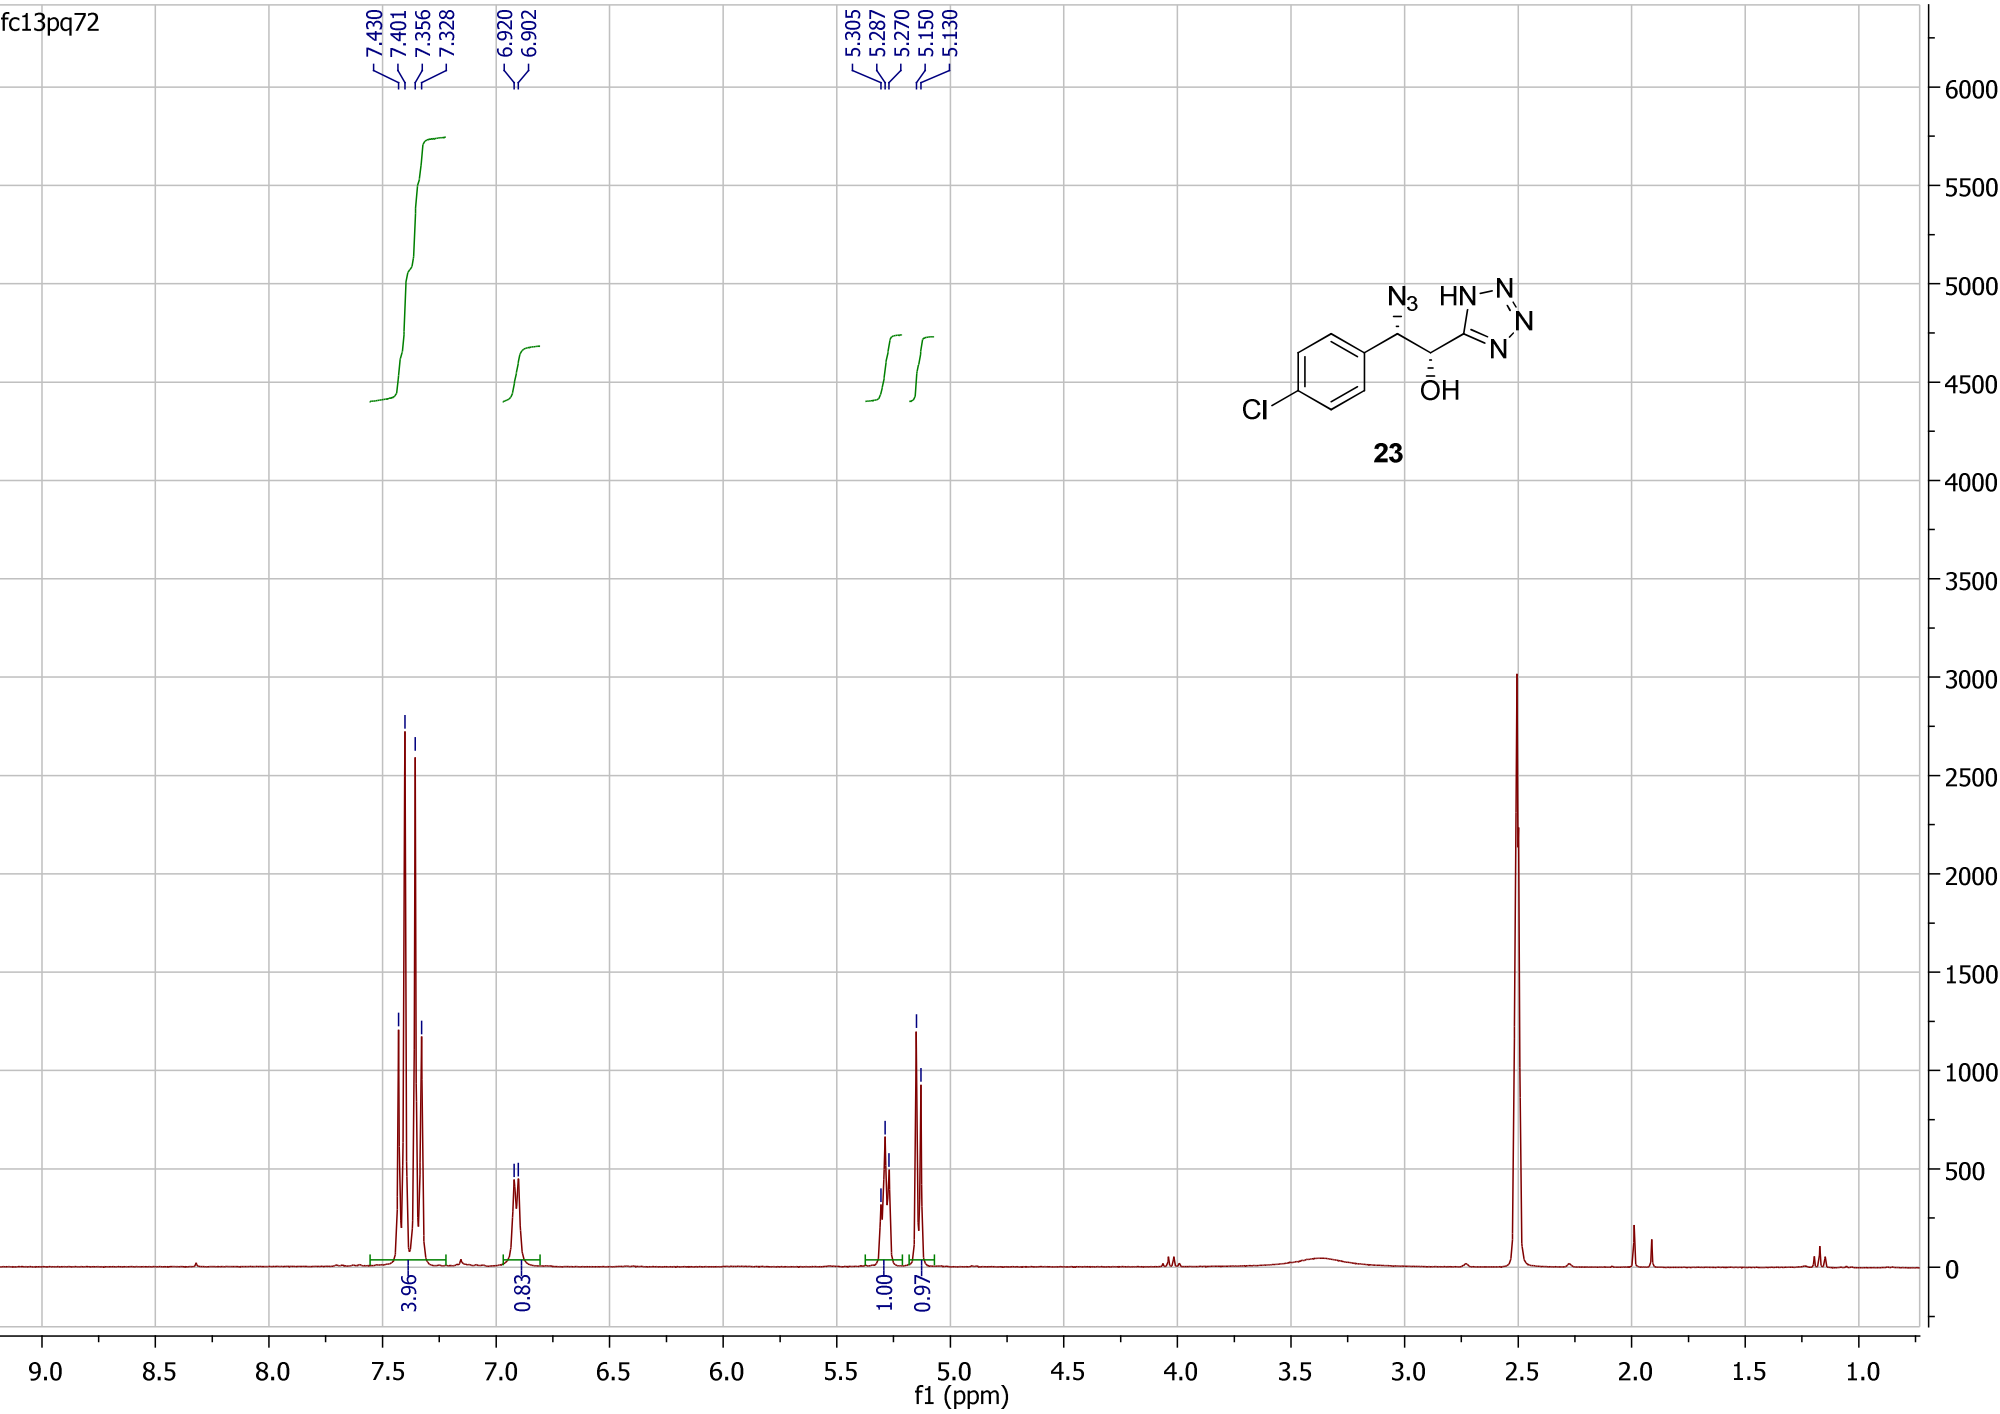

fc13pq72-300

134.733  
133.031  
129.747  
128.385  
67.933  
67.182

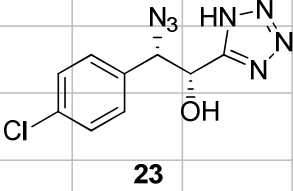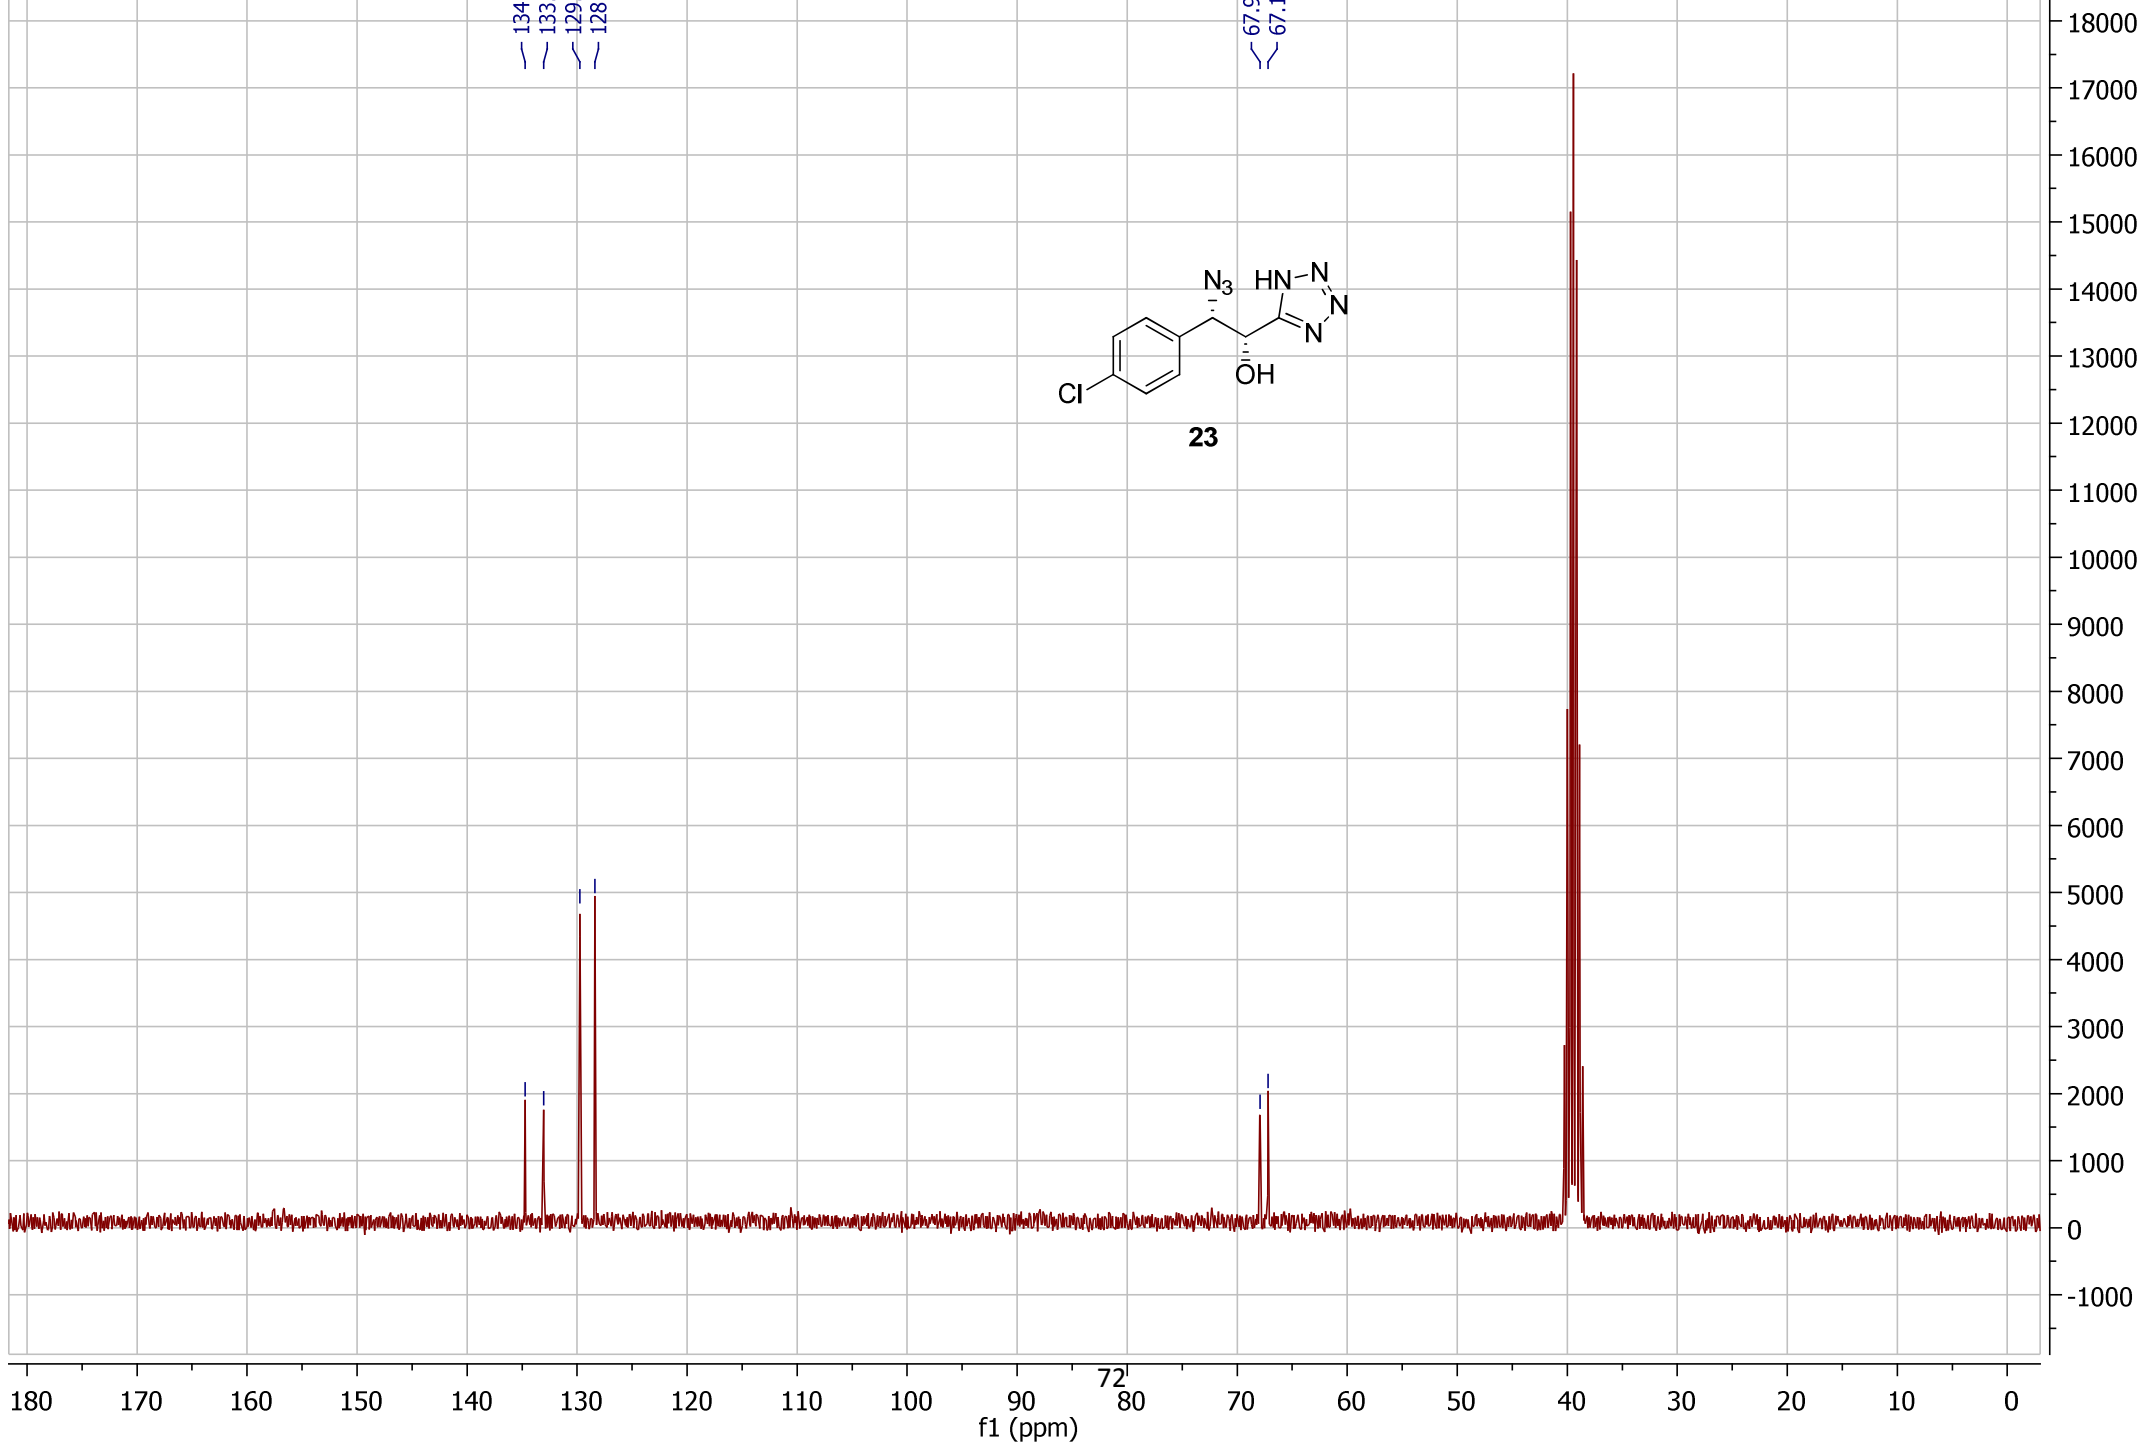



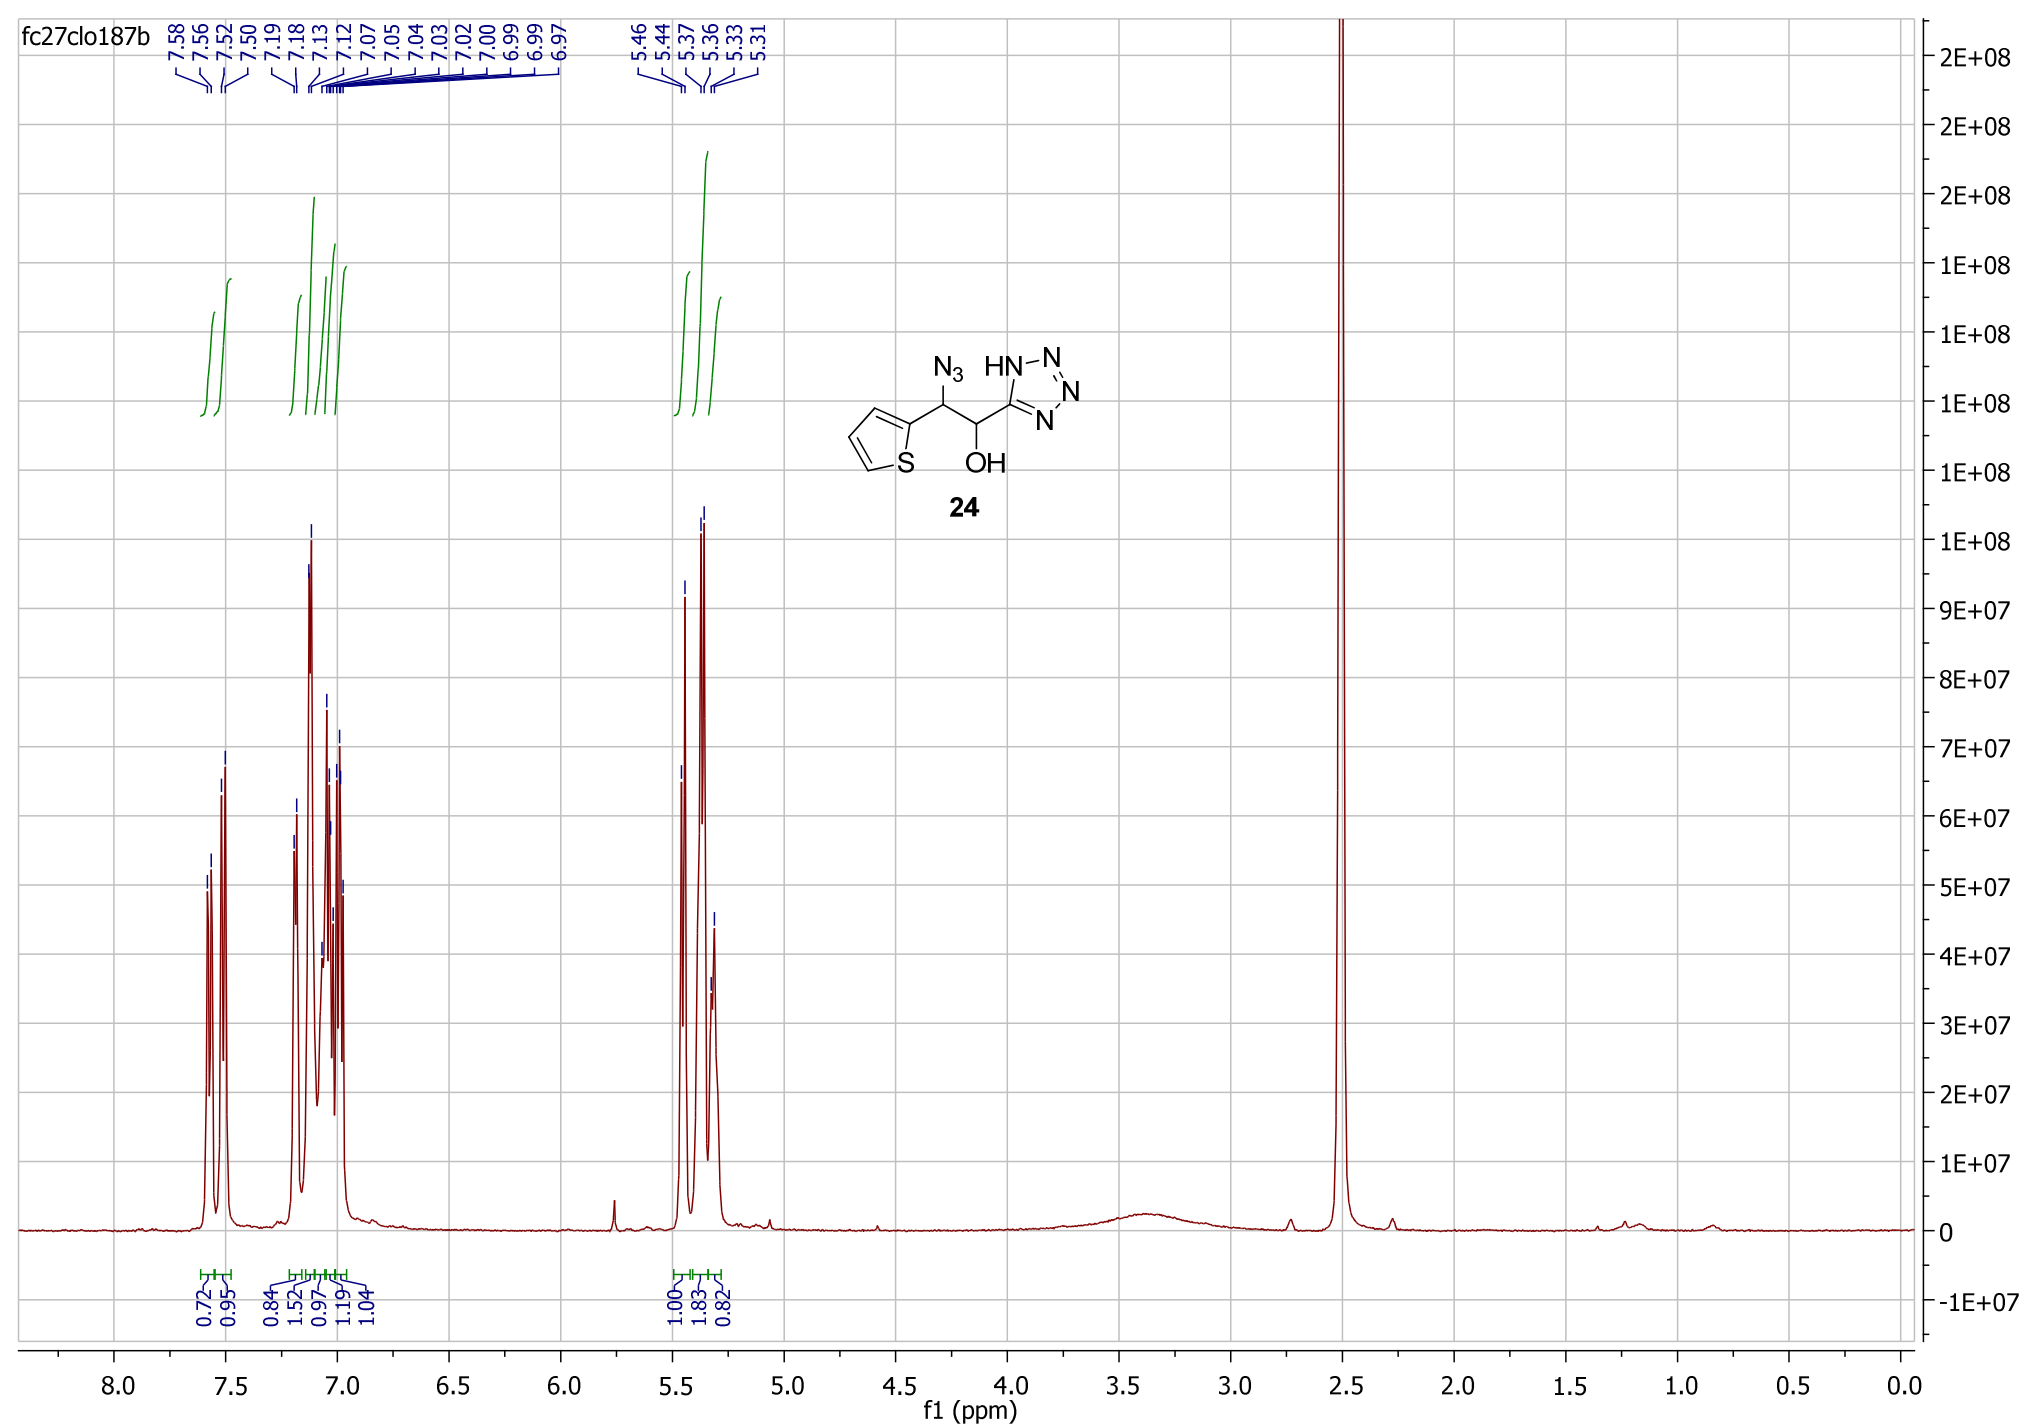

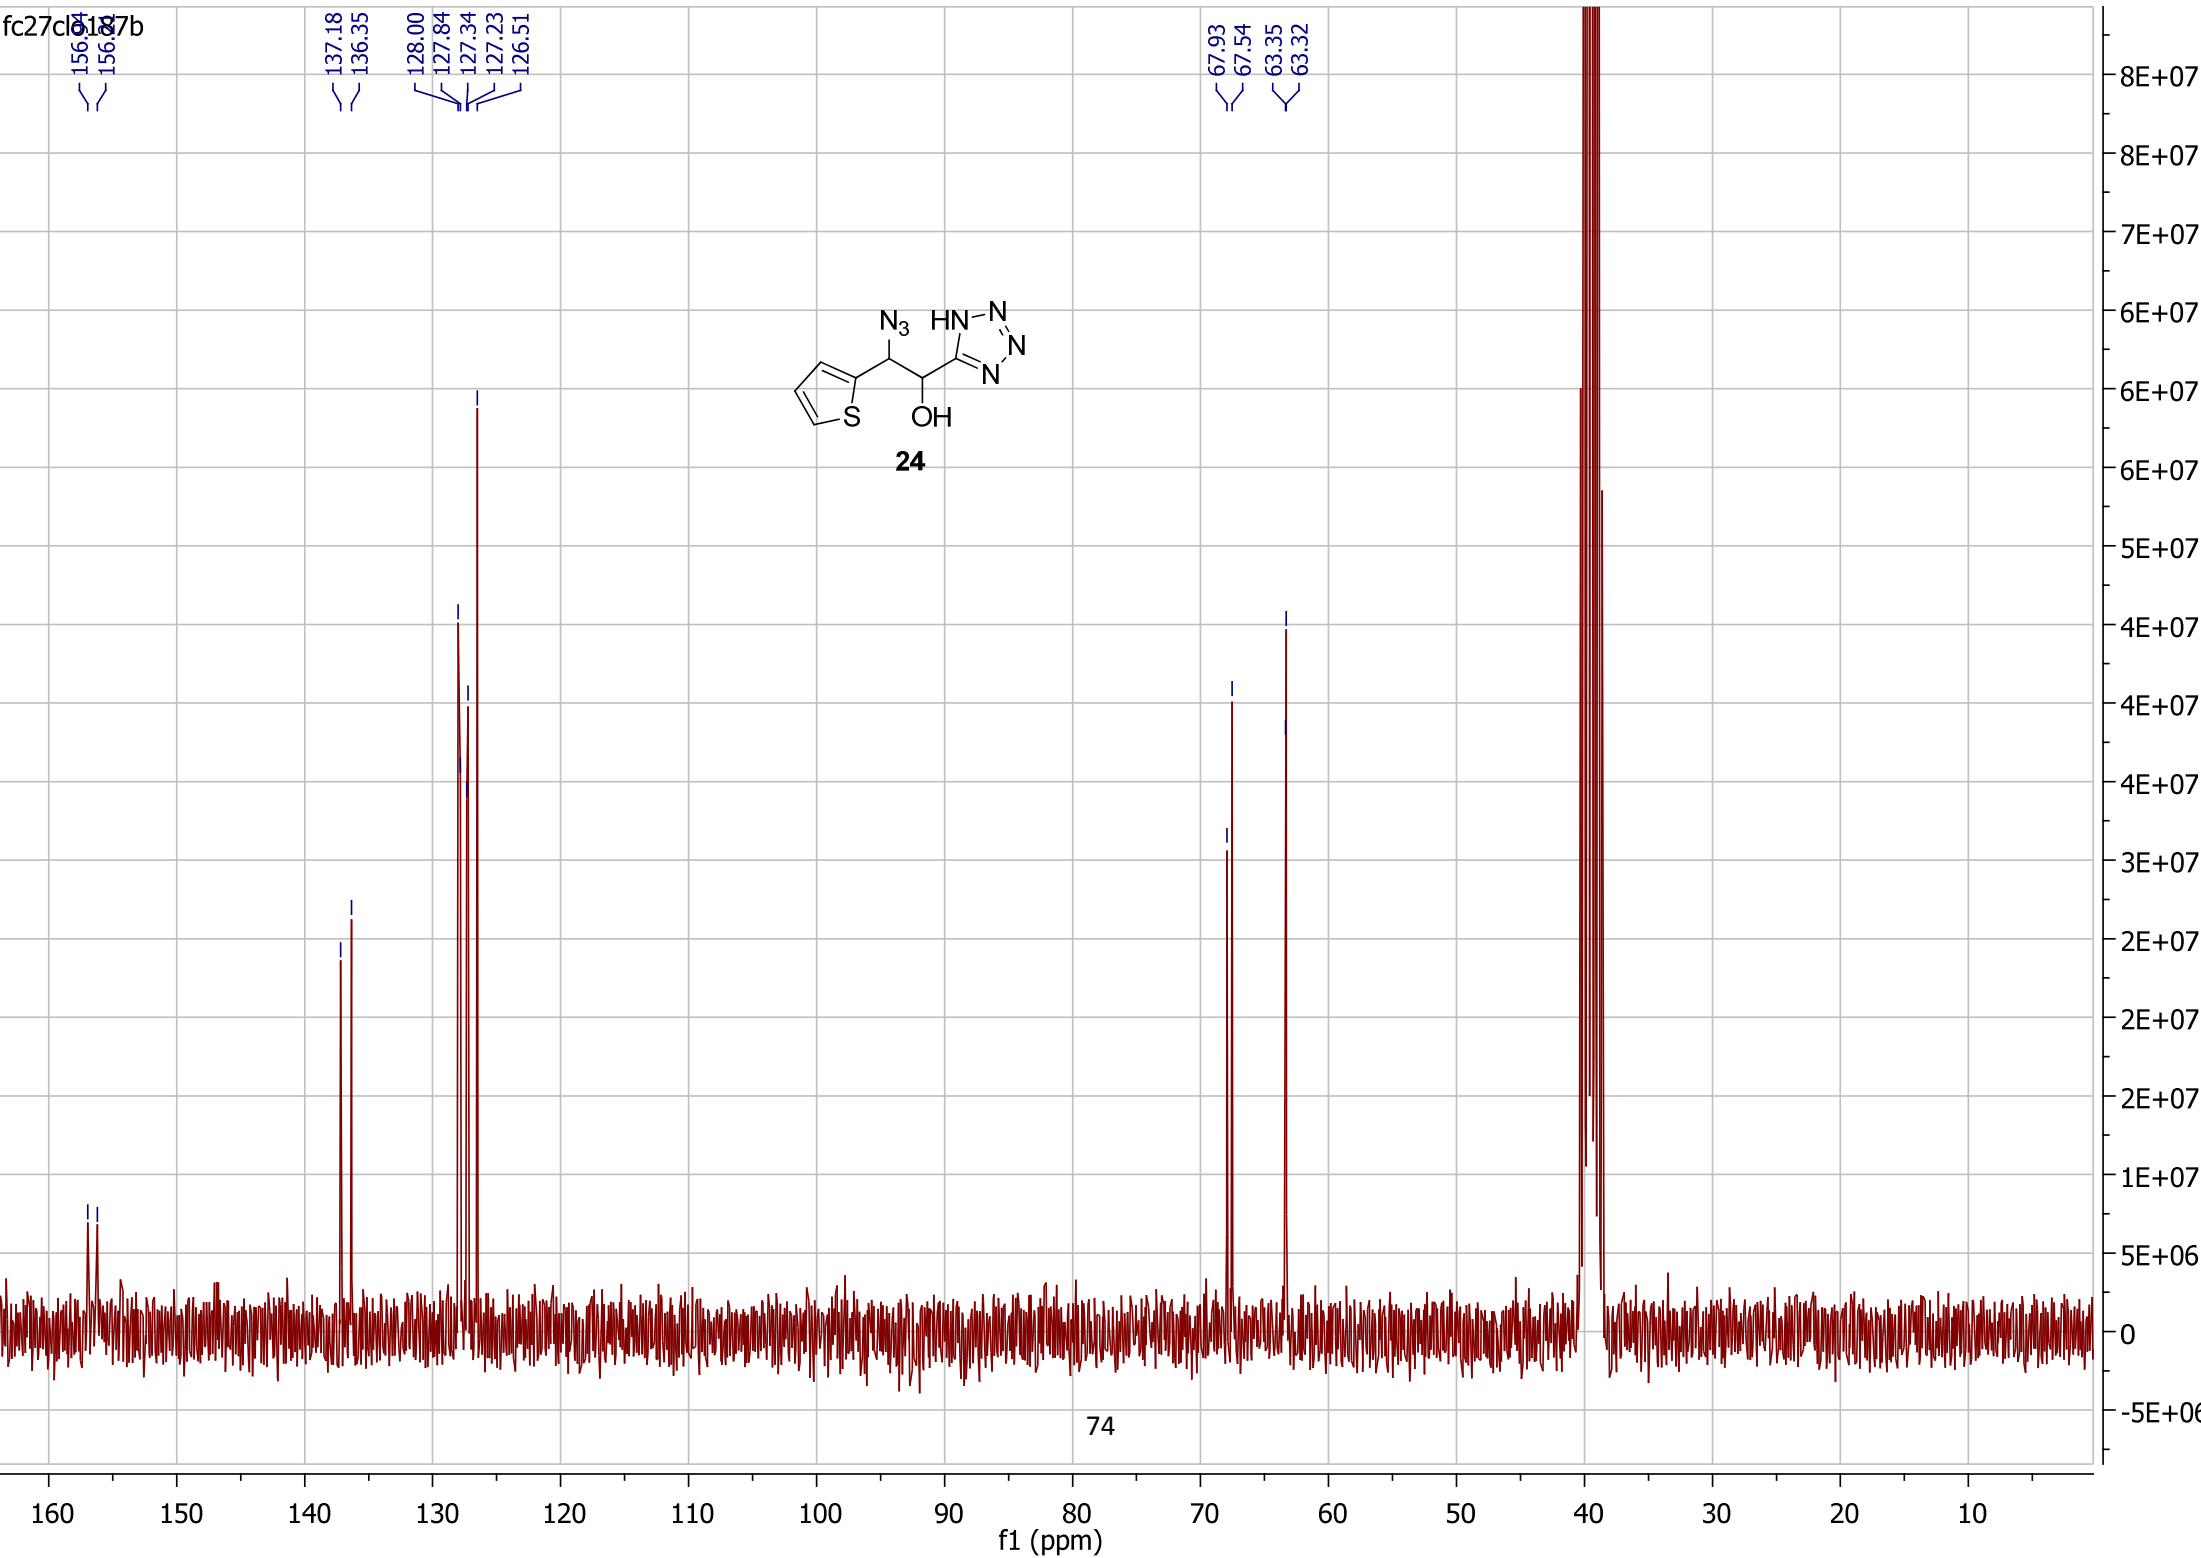

fc16clo177-2

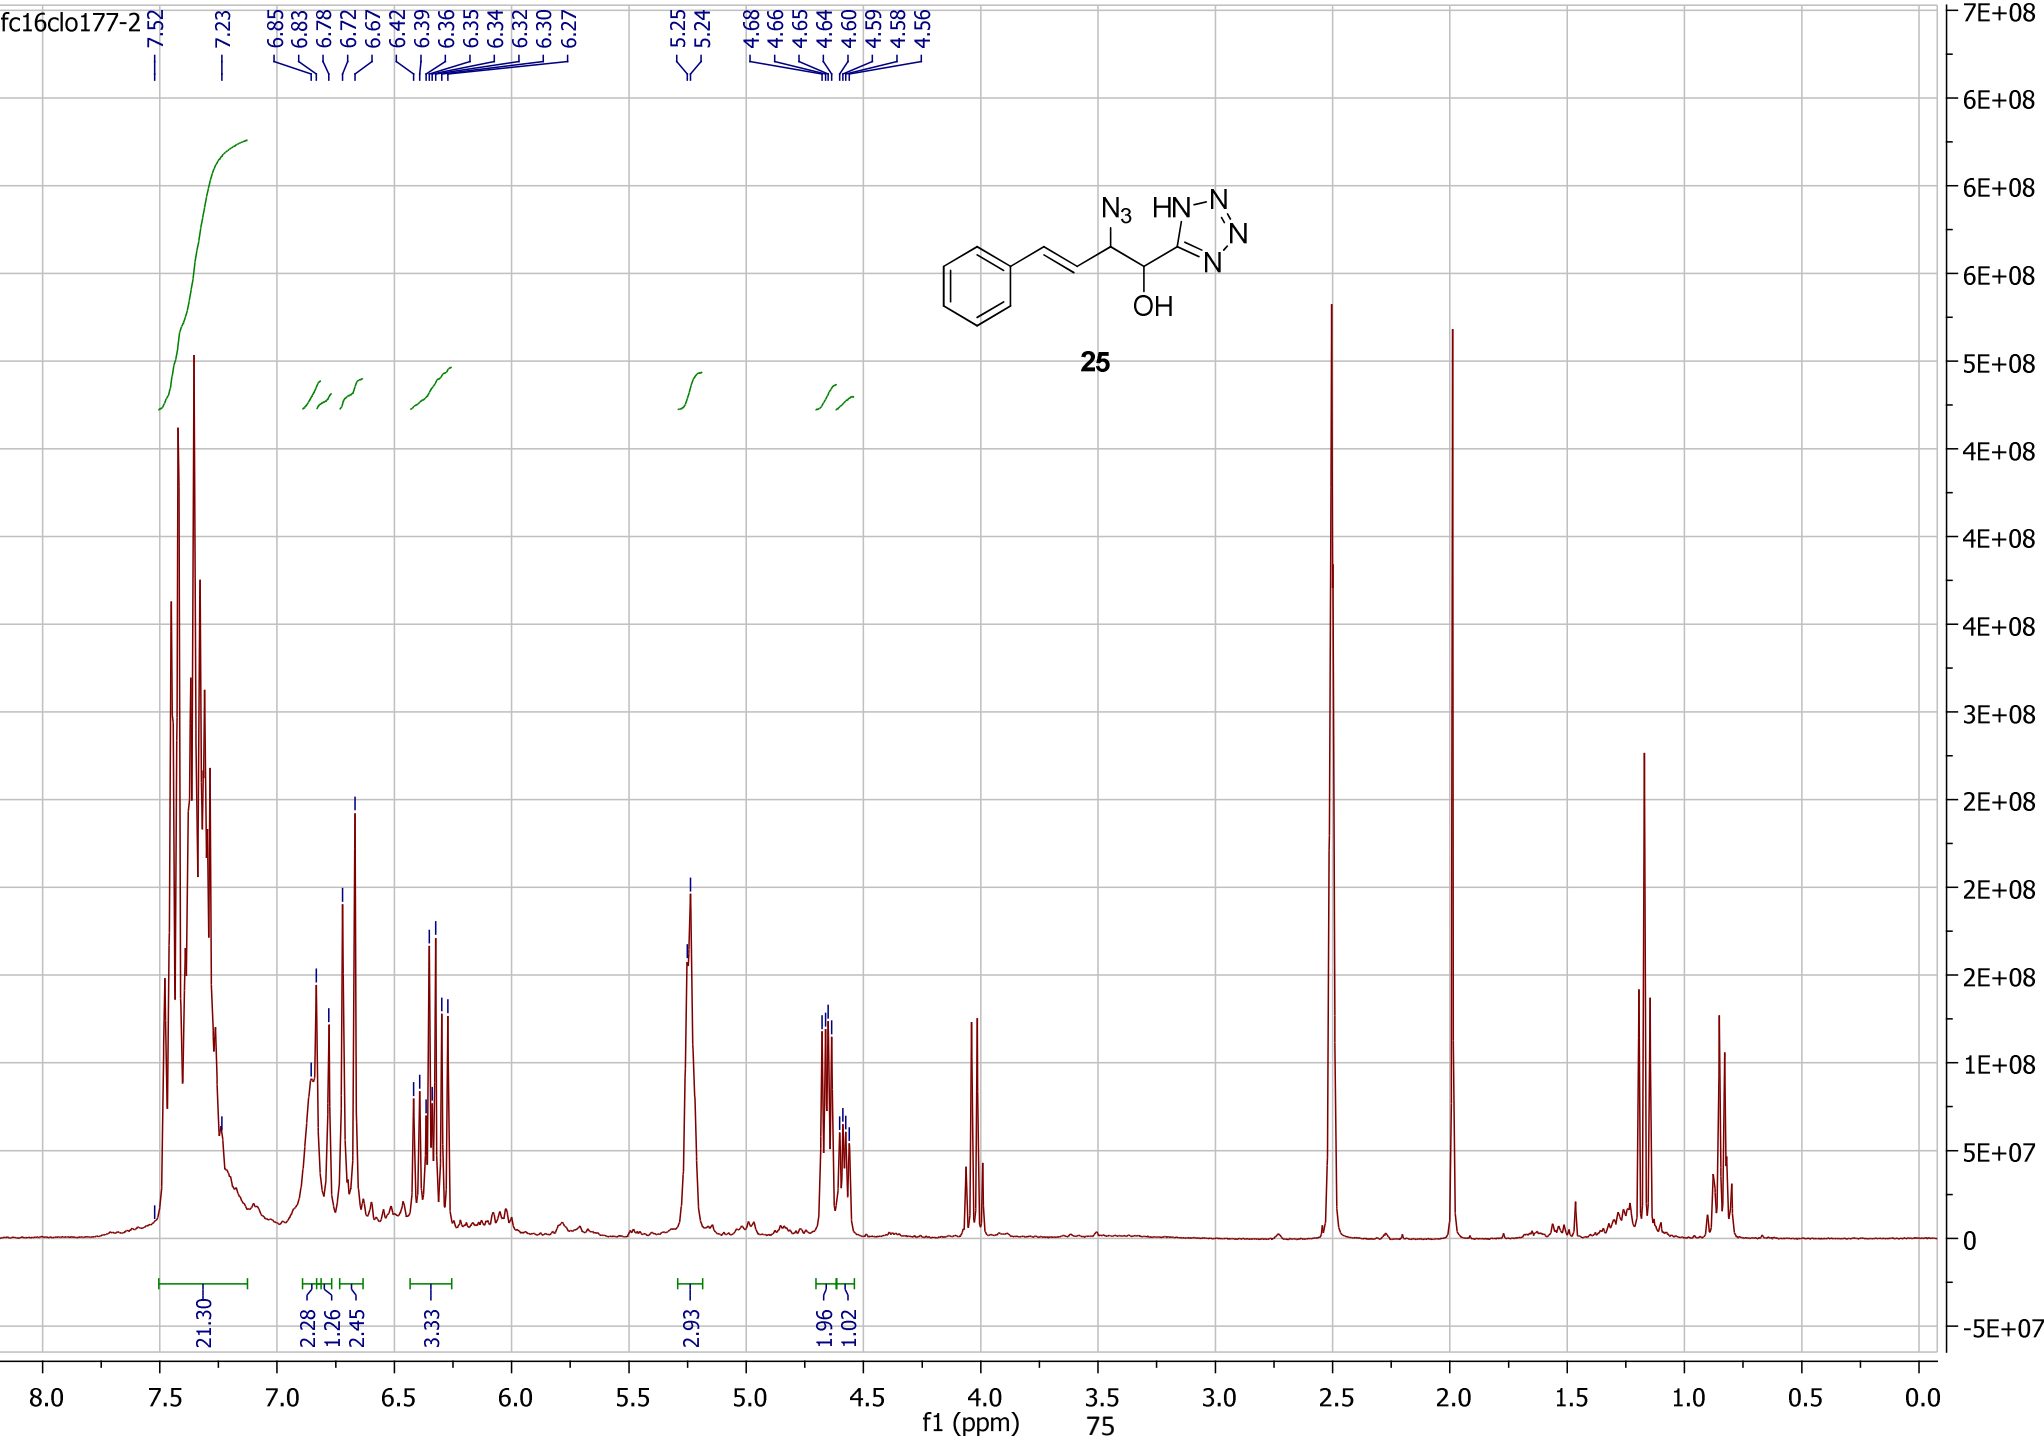

25

f1 (ppm)

75

fc16clo177-2

156.33

135.52  
135.07  
134.89  
128.69  
128.29  
126.63  
126.58  
122.79  
122.27

67.34  
67.08  
66.68  
66.51

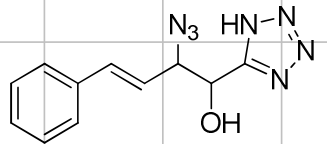

25

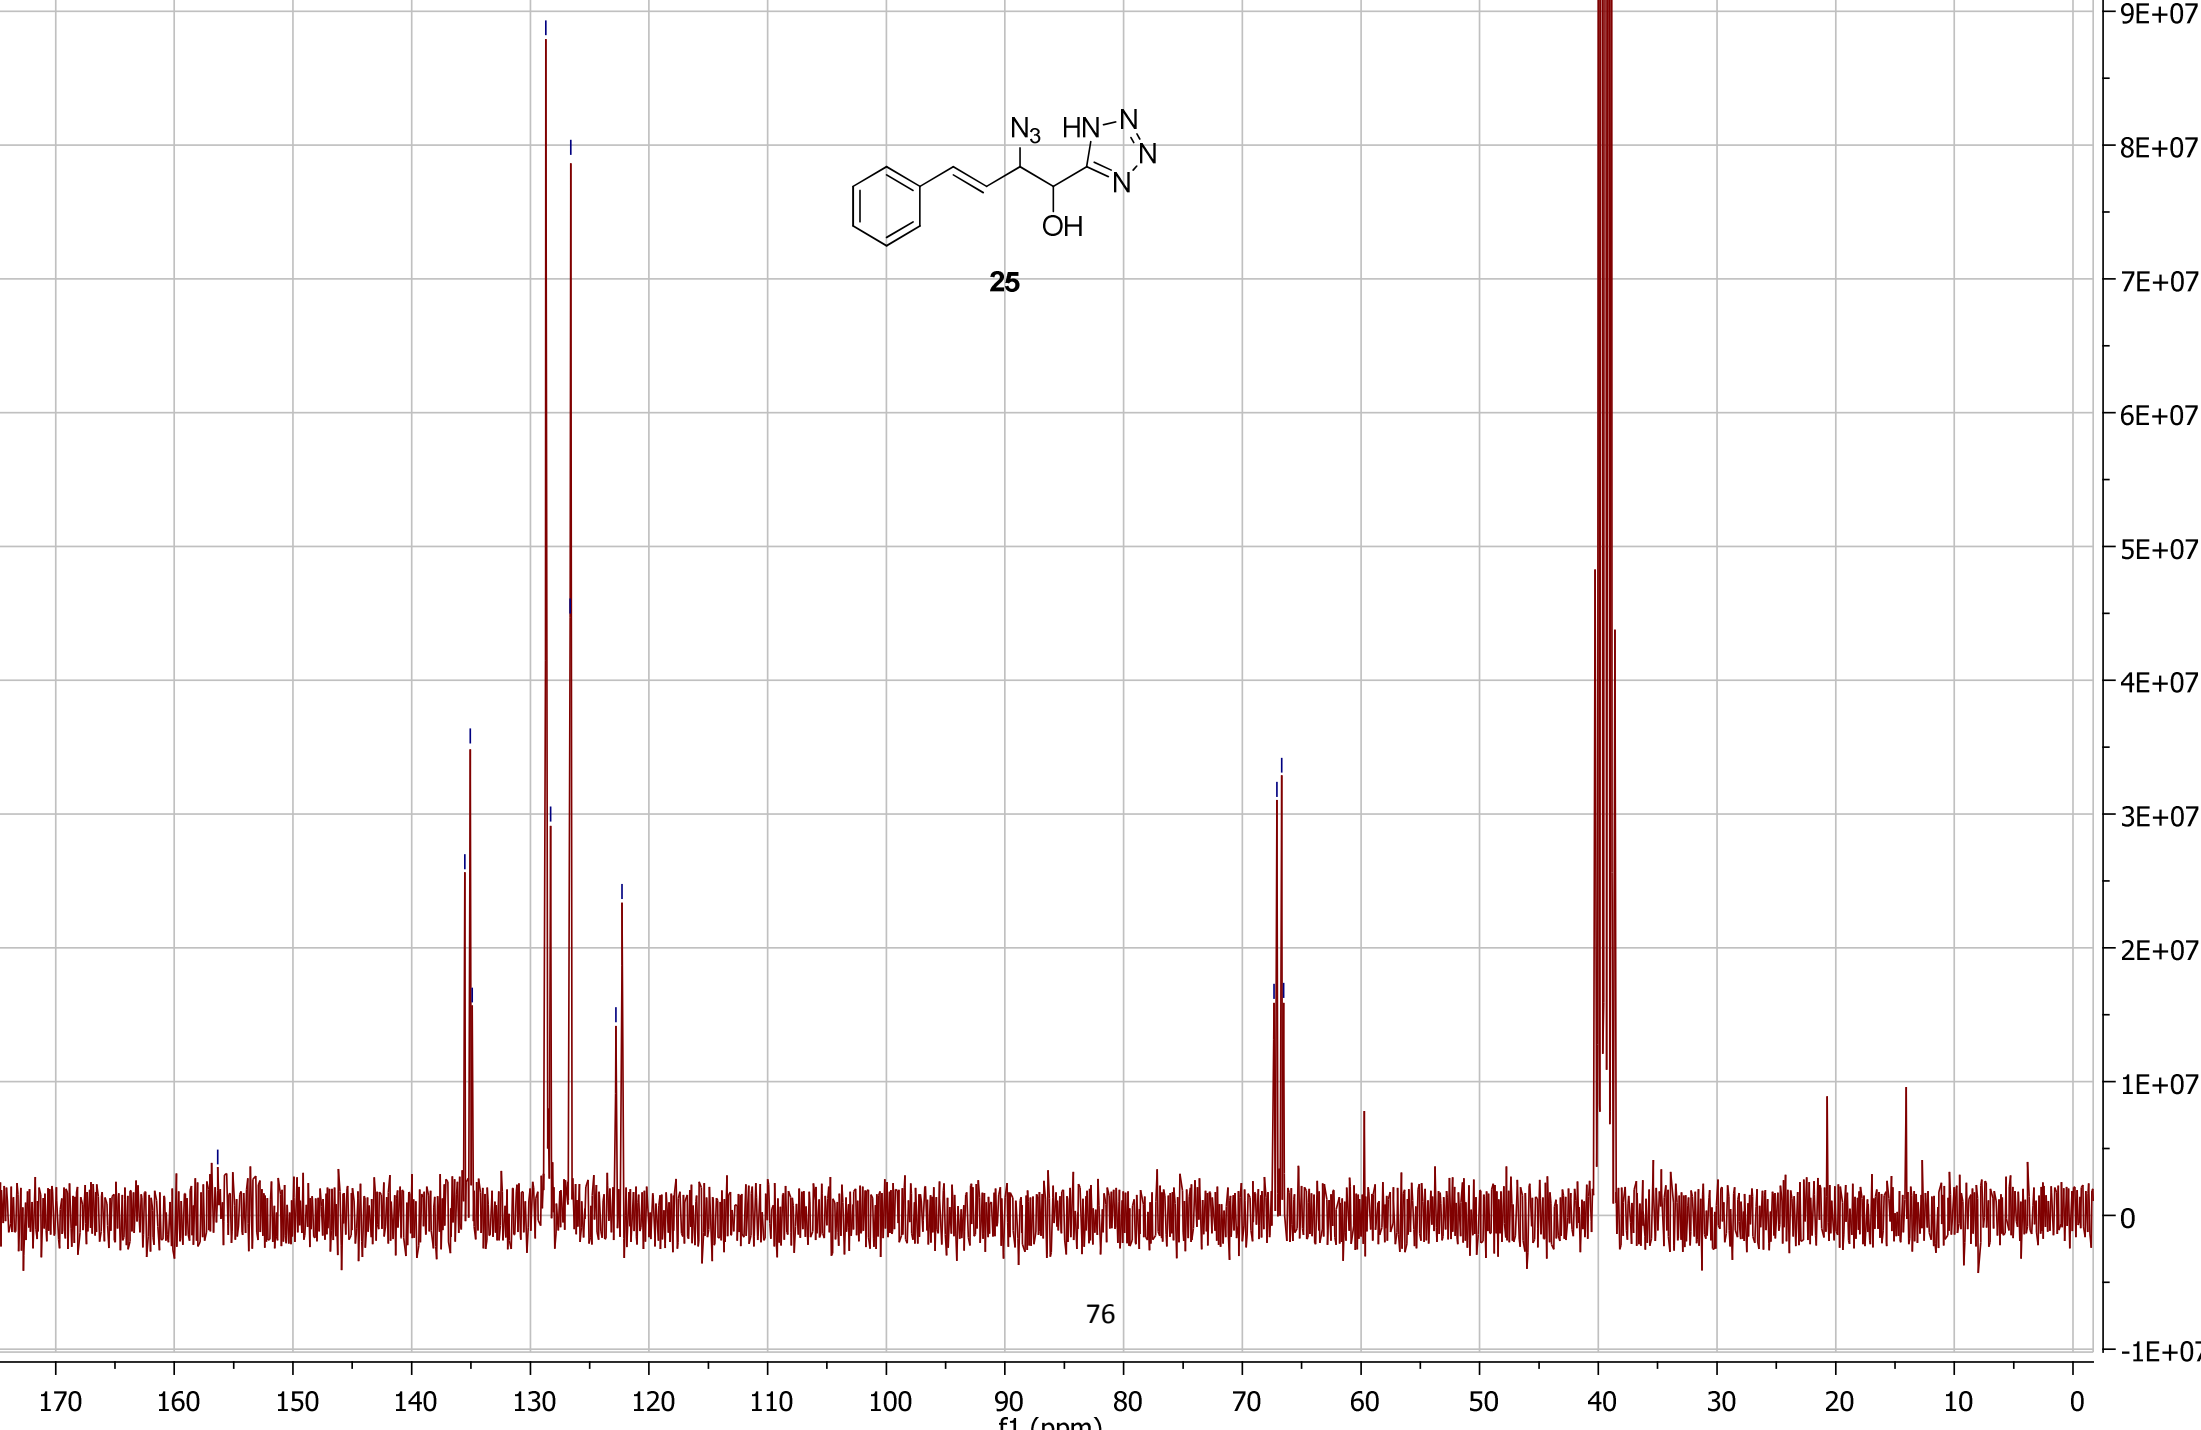

fc20clo183

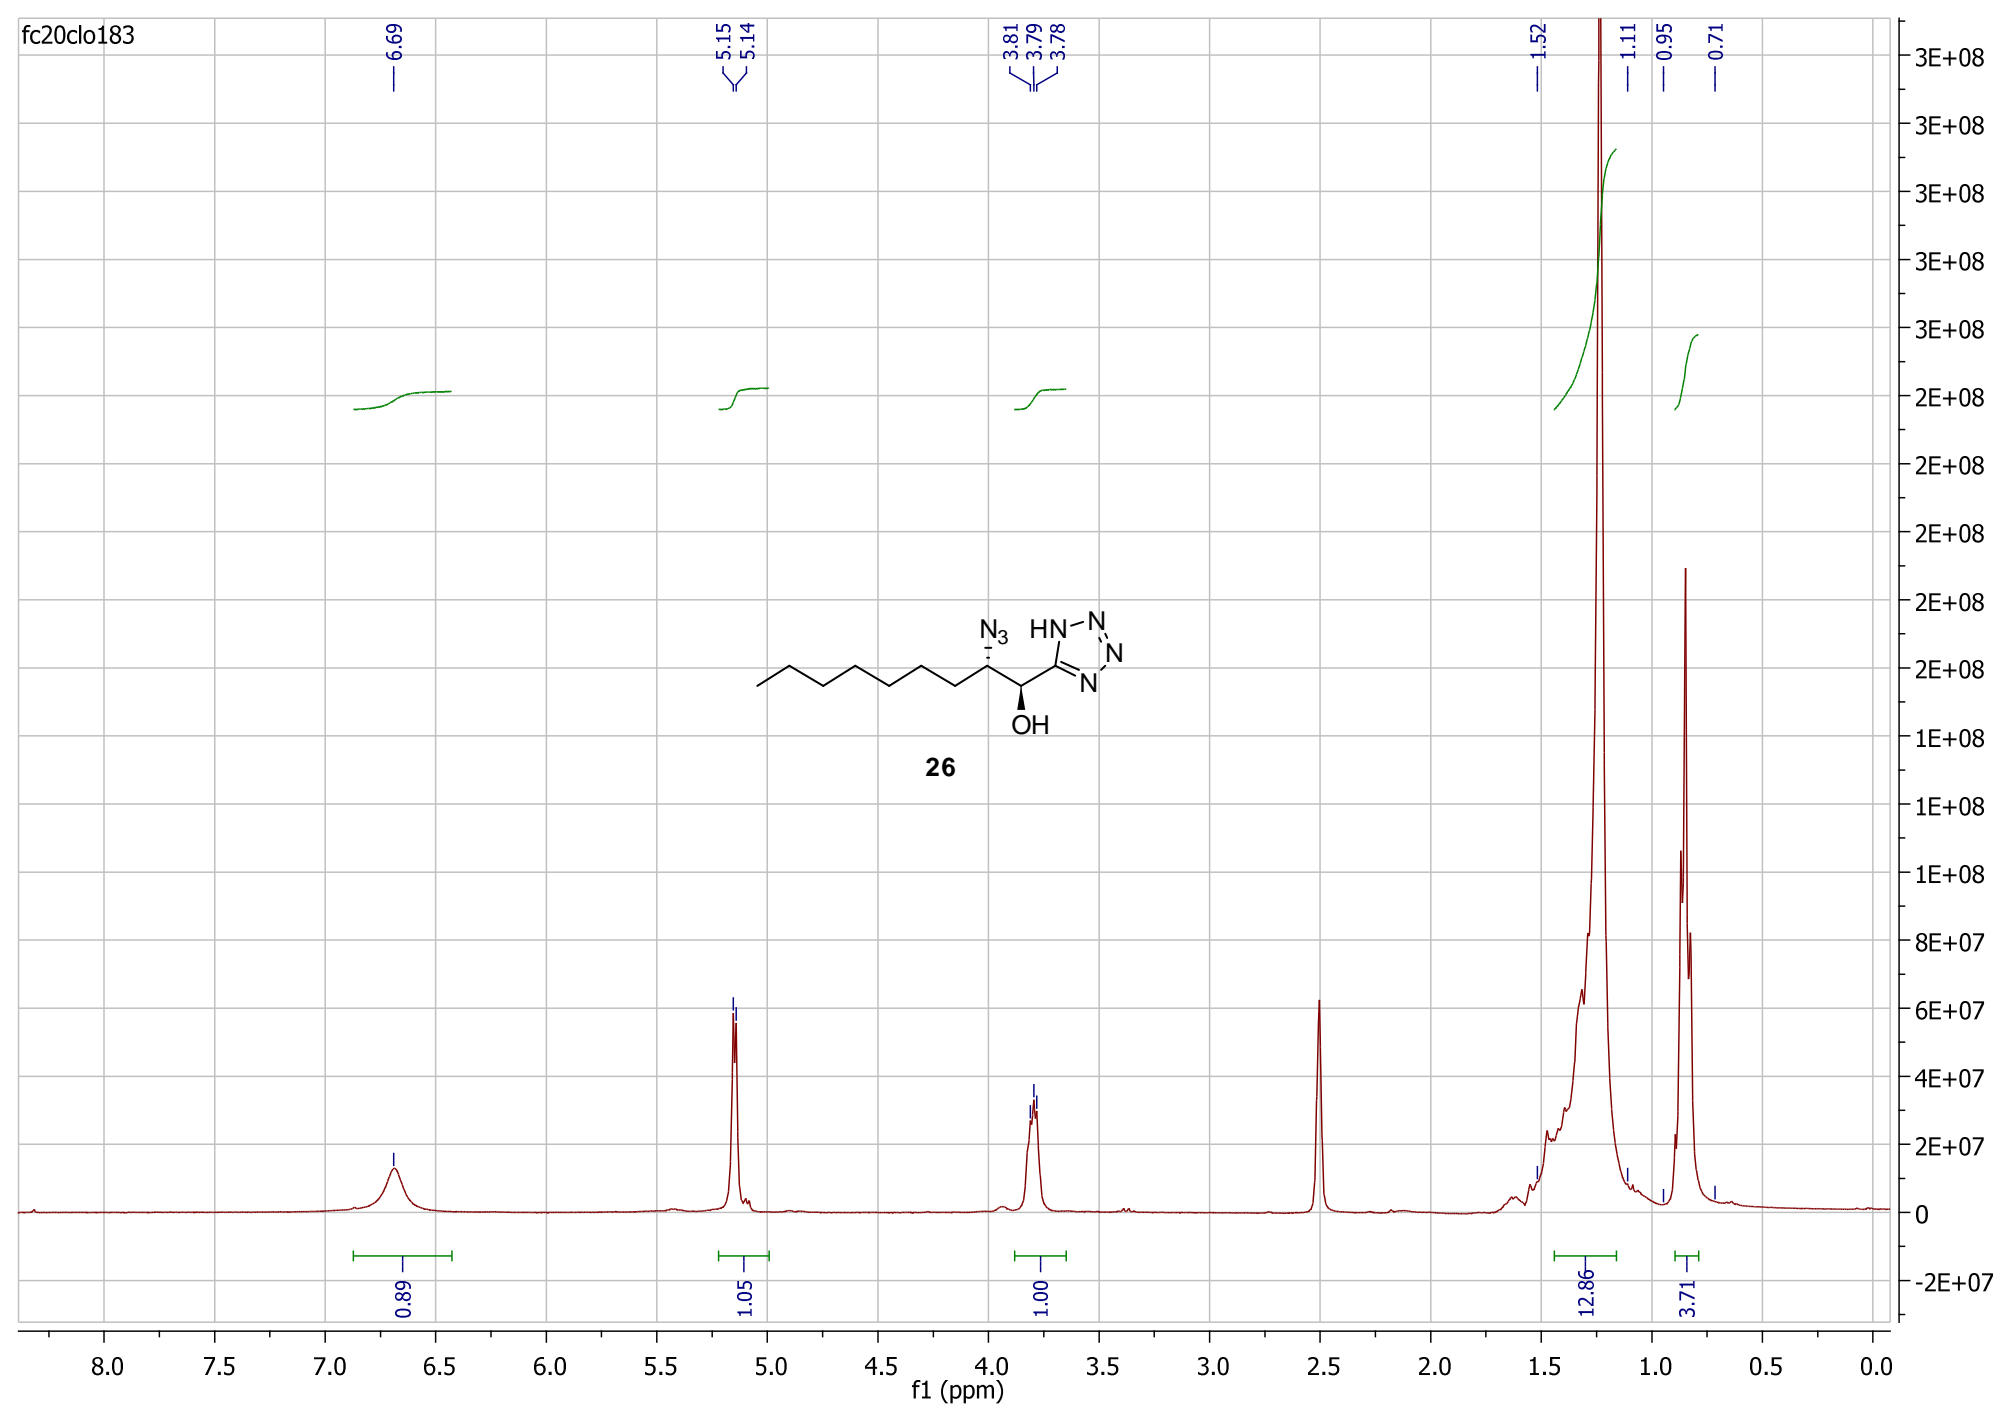

fc20c183

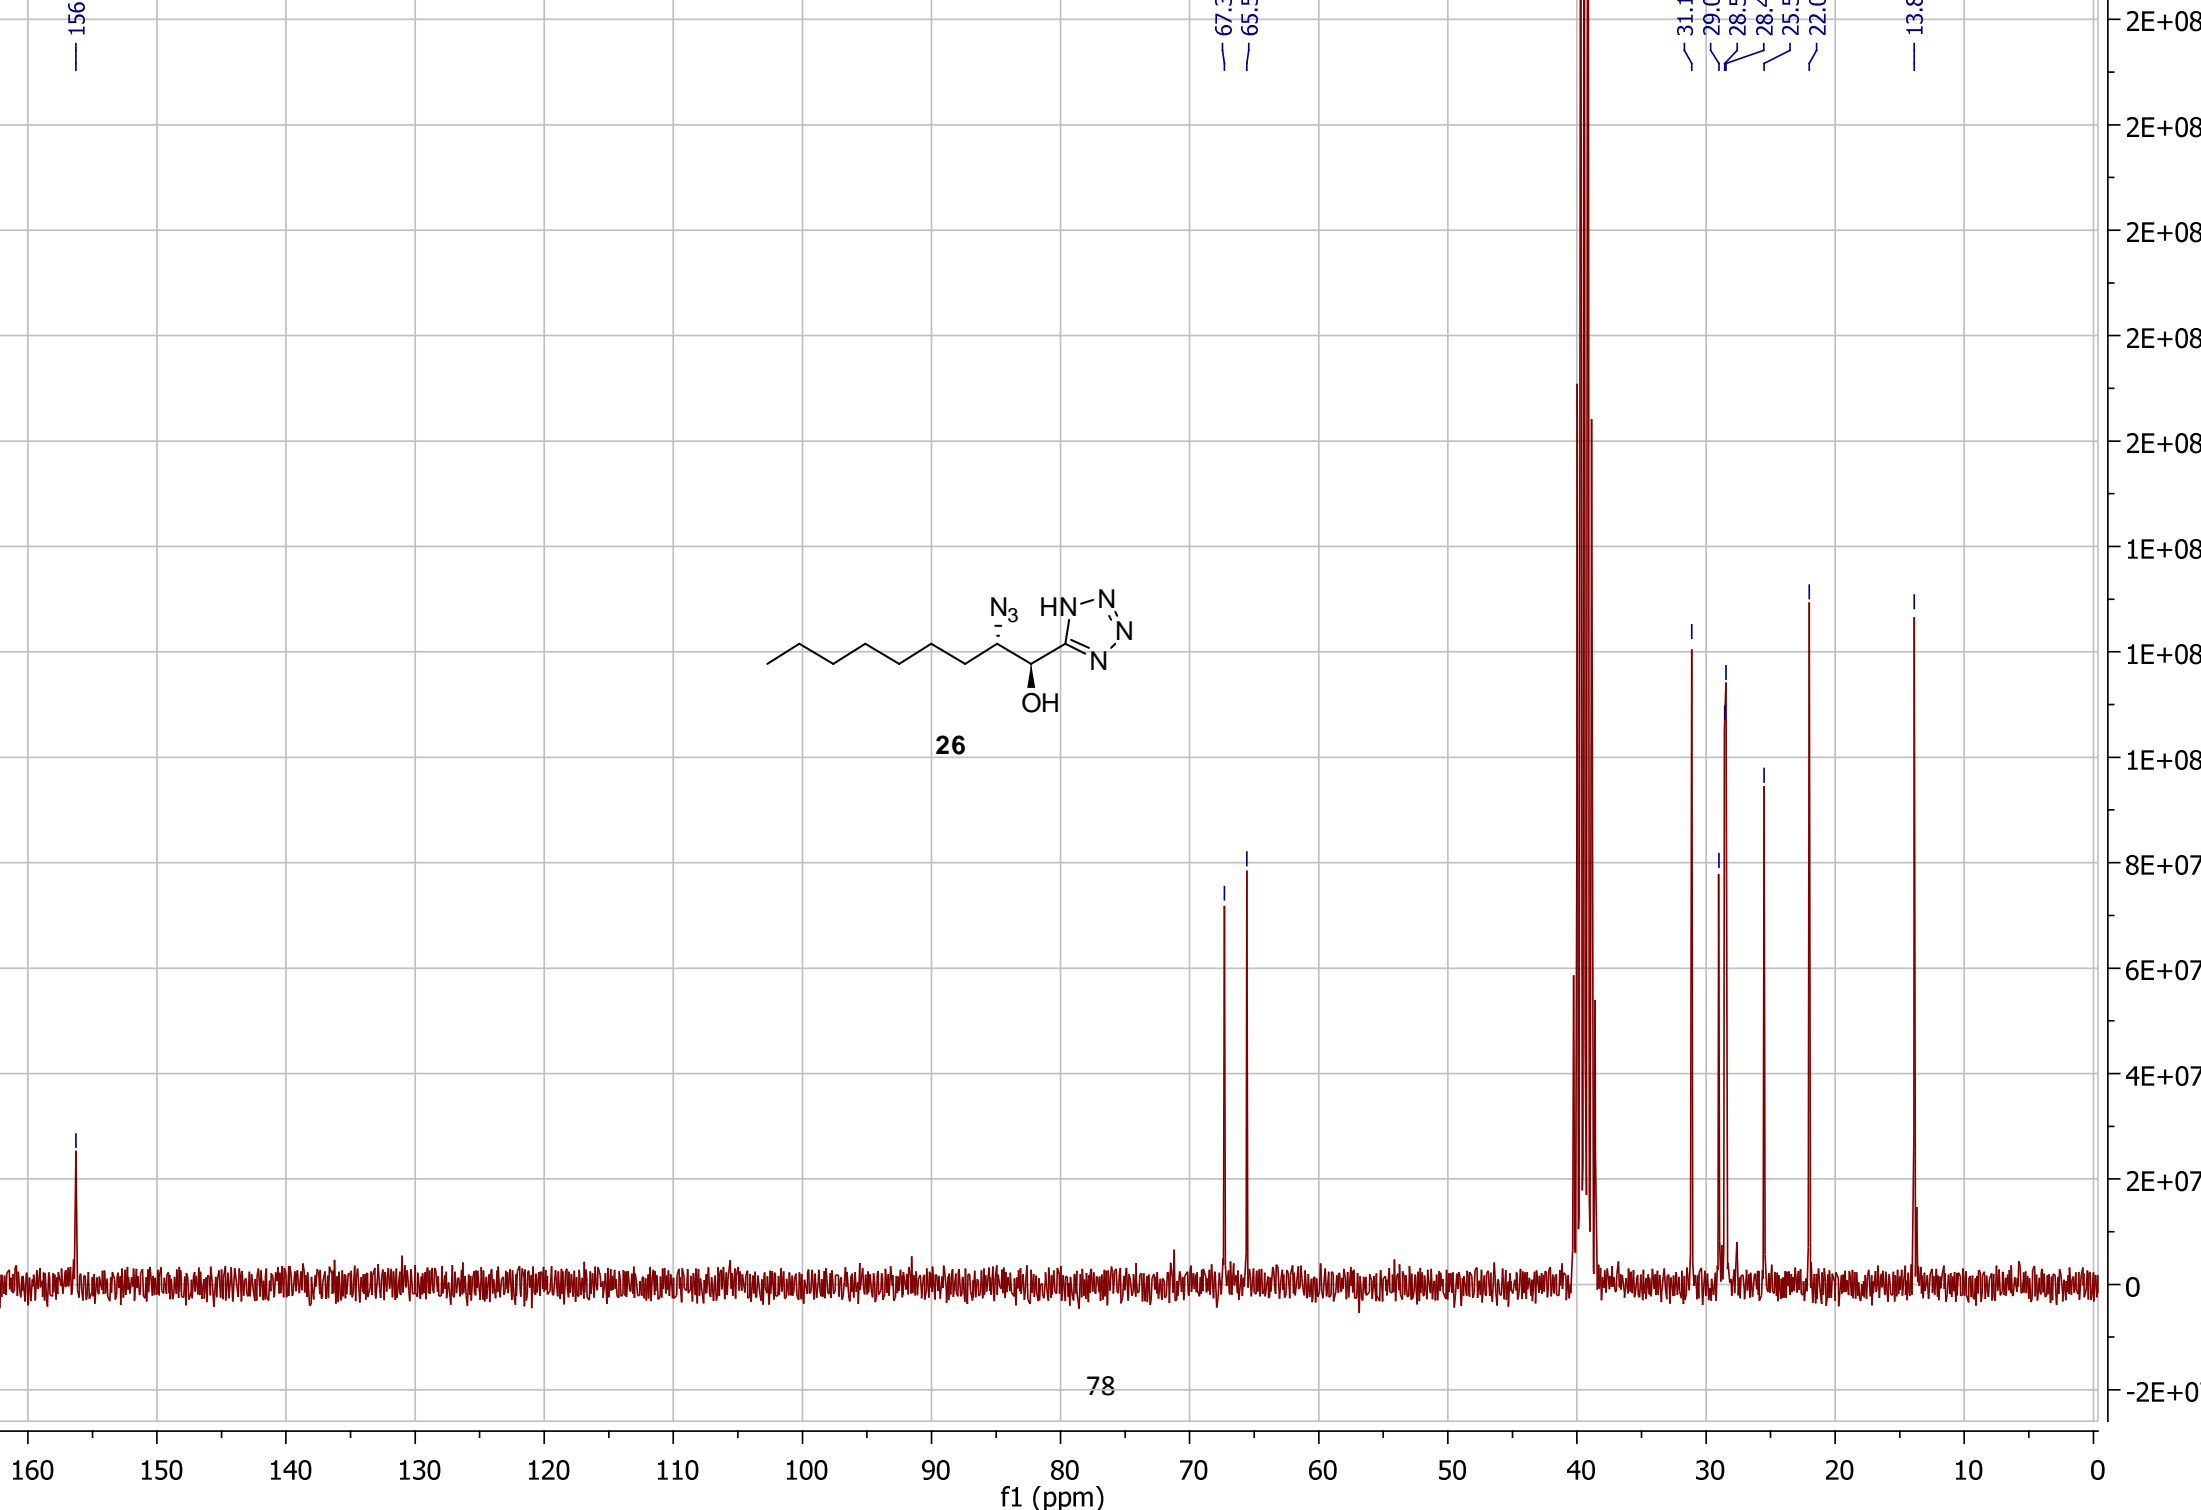

fc28clo203

6.75  
6.73

5.10  
5.09

1.96  
1.94  
1.91  
1.89  
1.87  
1.84  
1.81  
1.79  
1.77  
1.74  
1.72  
1.69  
1.35  
1.33  
1.31  
1.28  
1.25  
1.22  
1.20  
1.17  
1.15  
0.97  
0.94  
0.92  
0.83  
0.80  
0.78

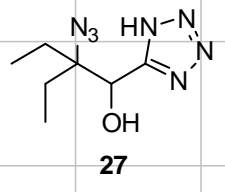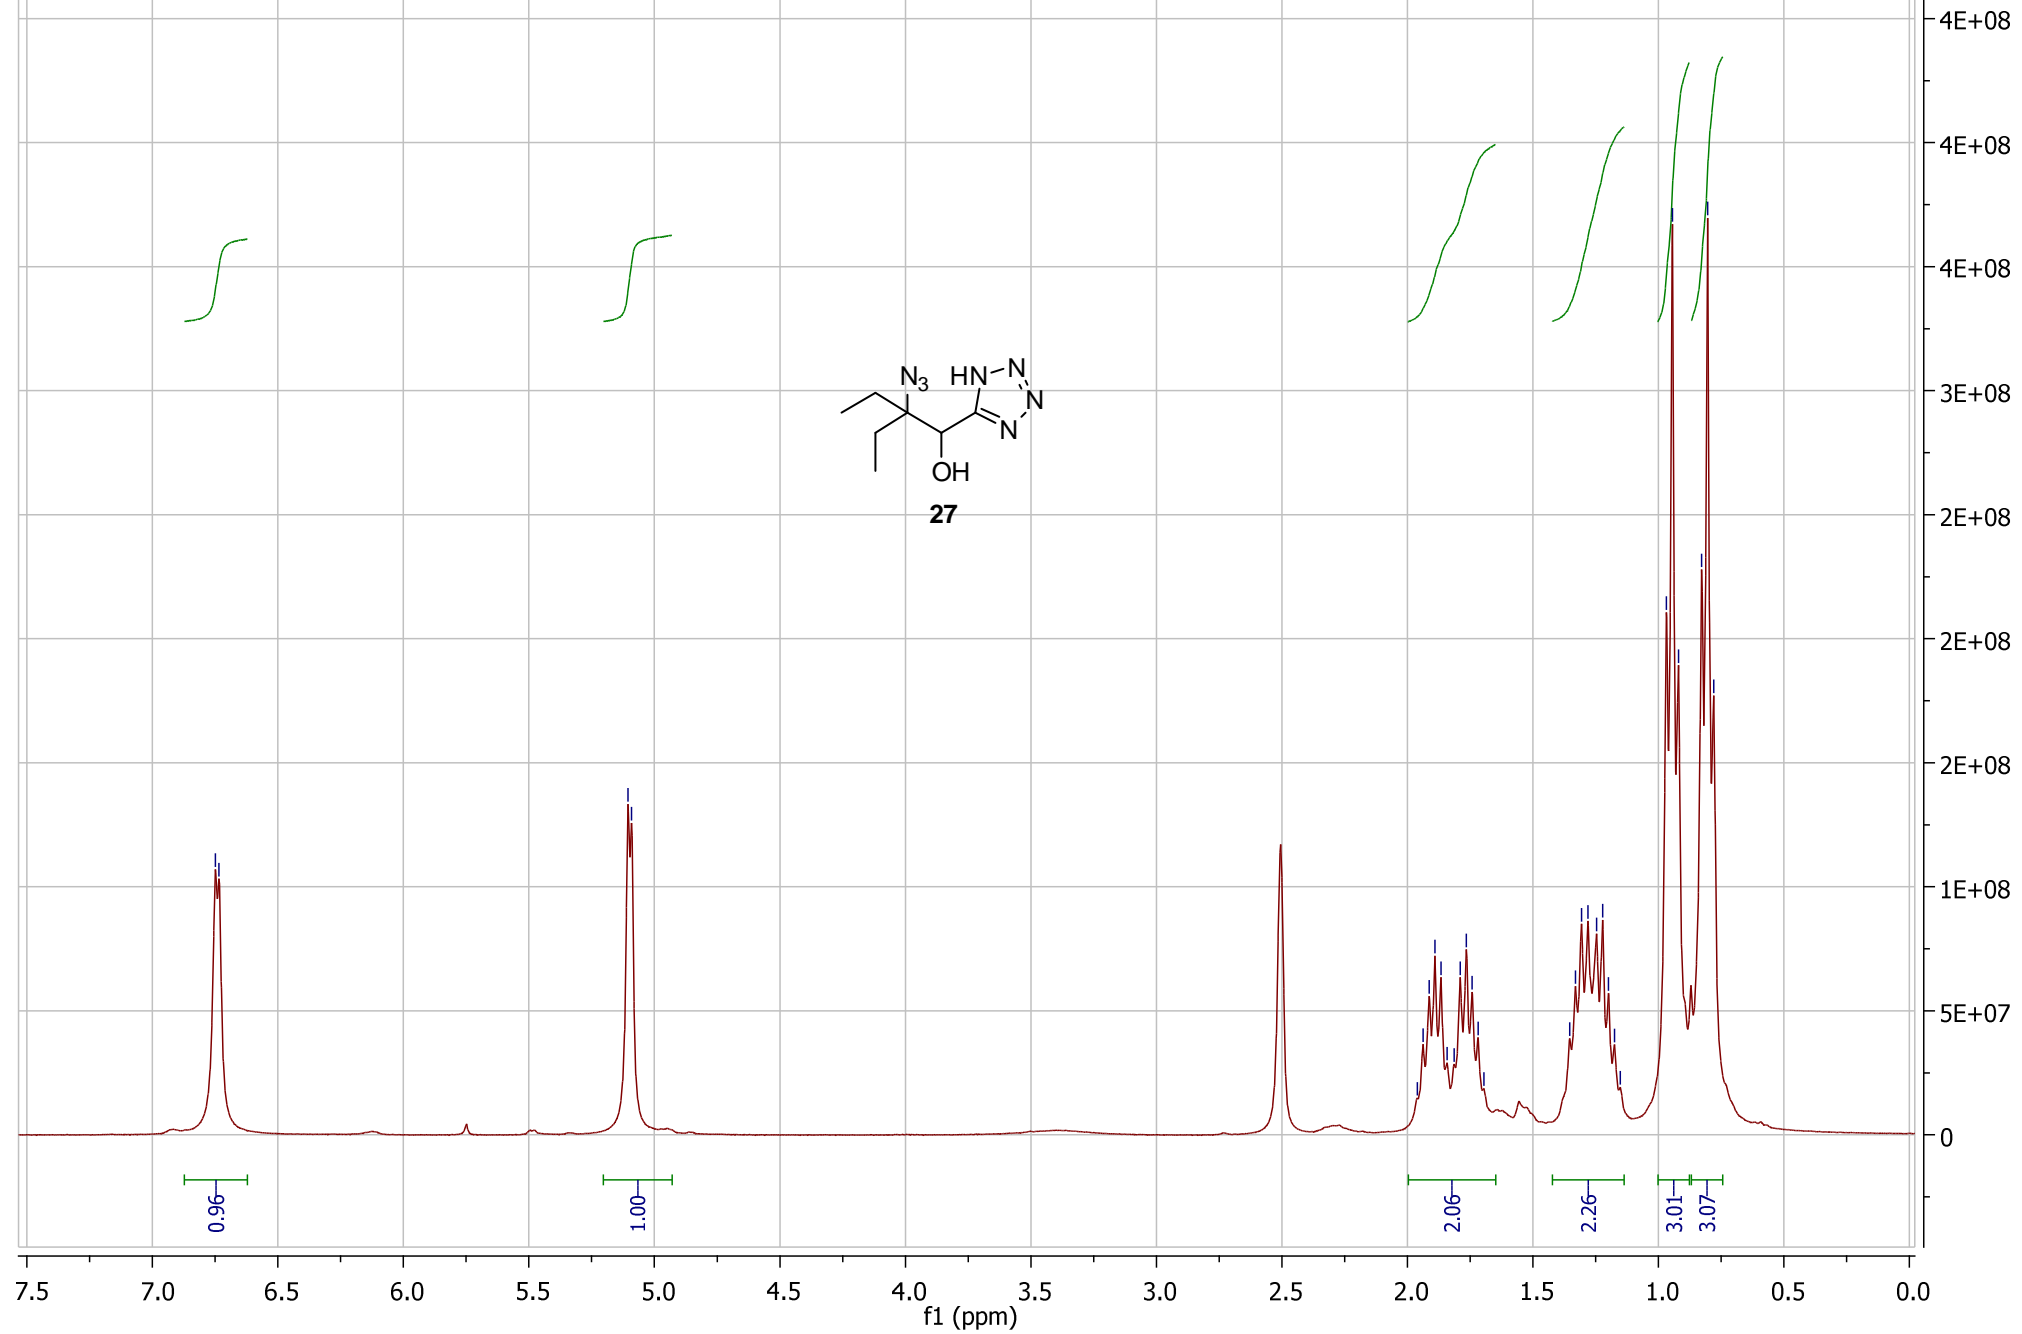

0.96

1.00

2.06

2.26

3.01

3.07

7.5 7.0 6.5 6.0 5.5 5.0 4.5 4.0 3.5 3.0 2.5 2.0 1.5 1.0 0.5 0.0

f1 (ppm)

79

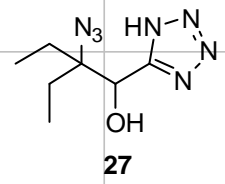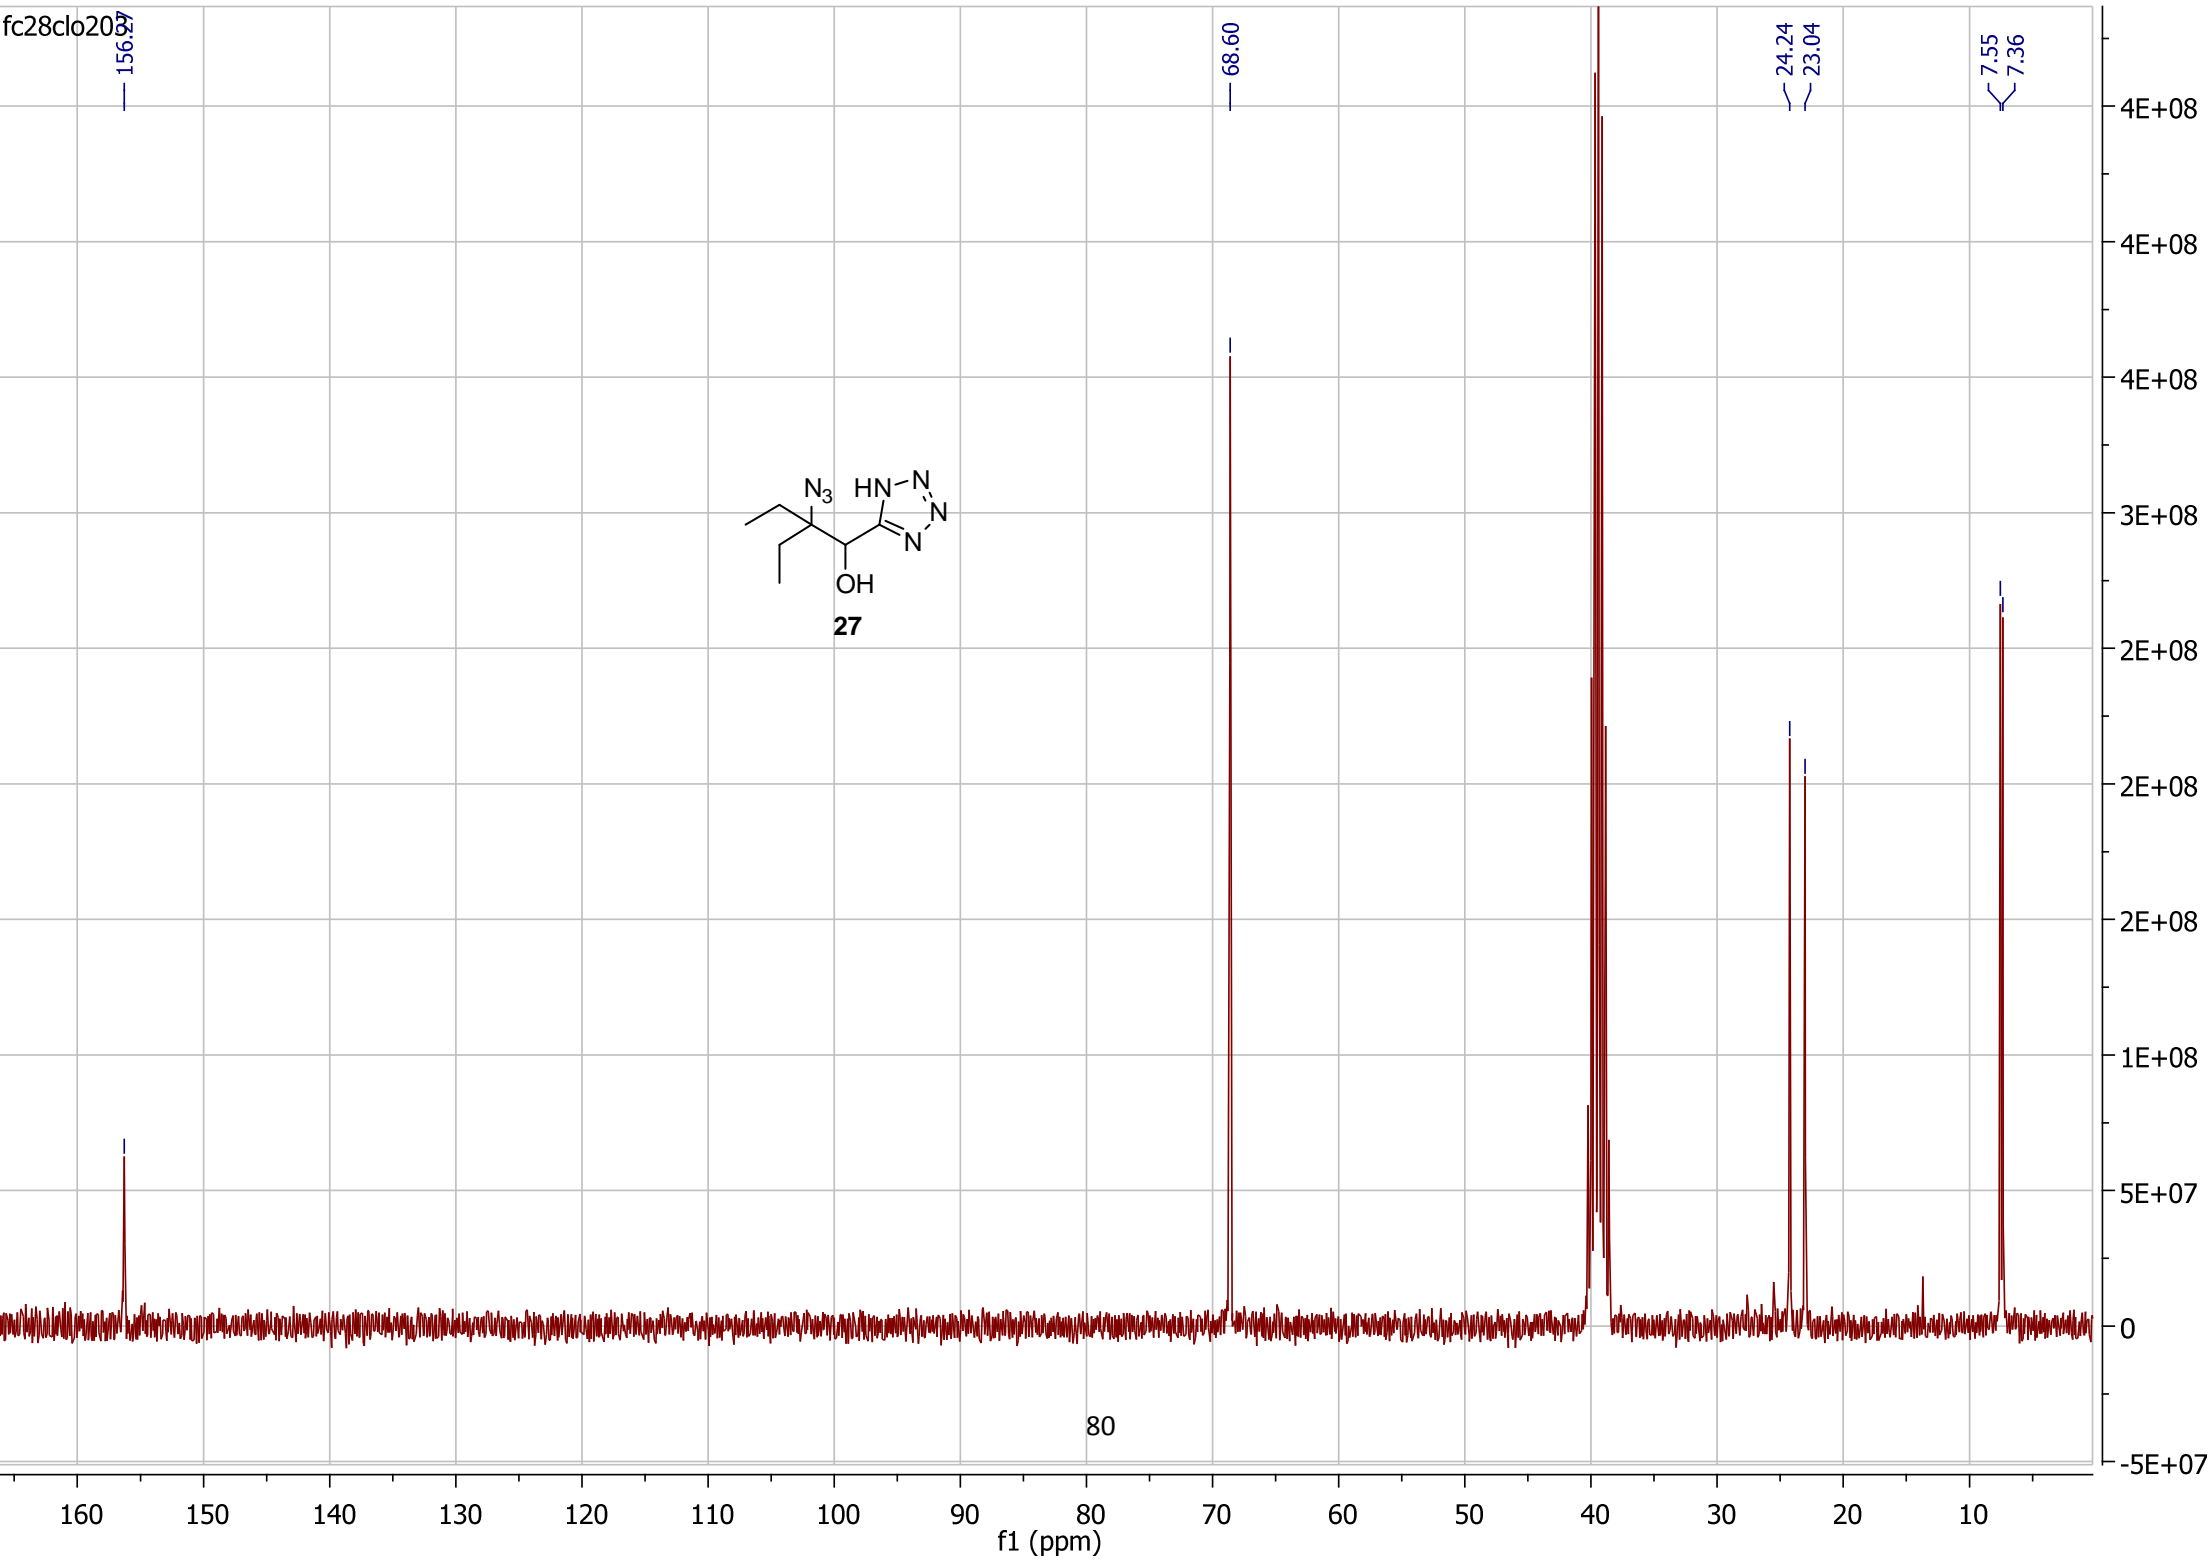



6.78  
6.77

5.11  
5.09

2.03  
1.90  
1.82

1.55

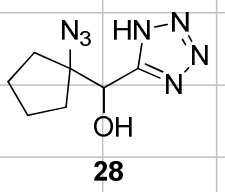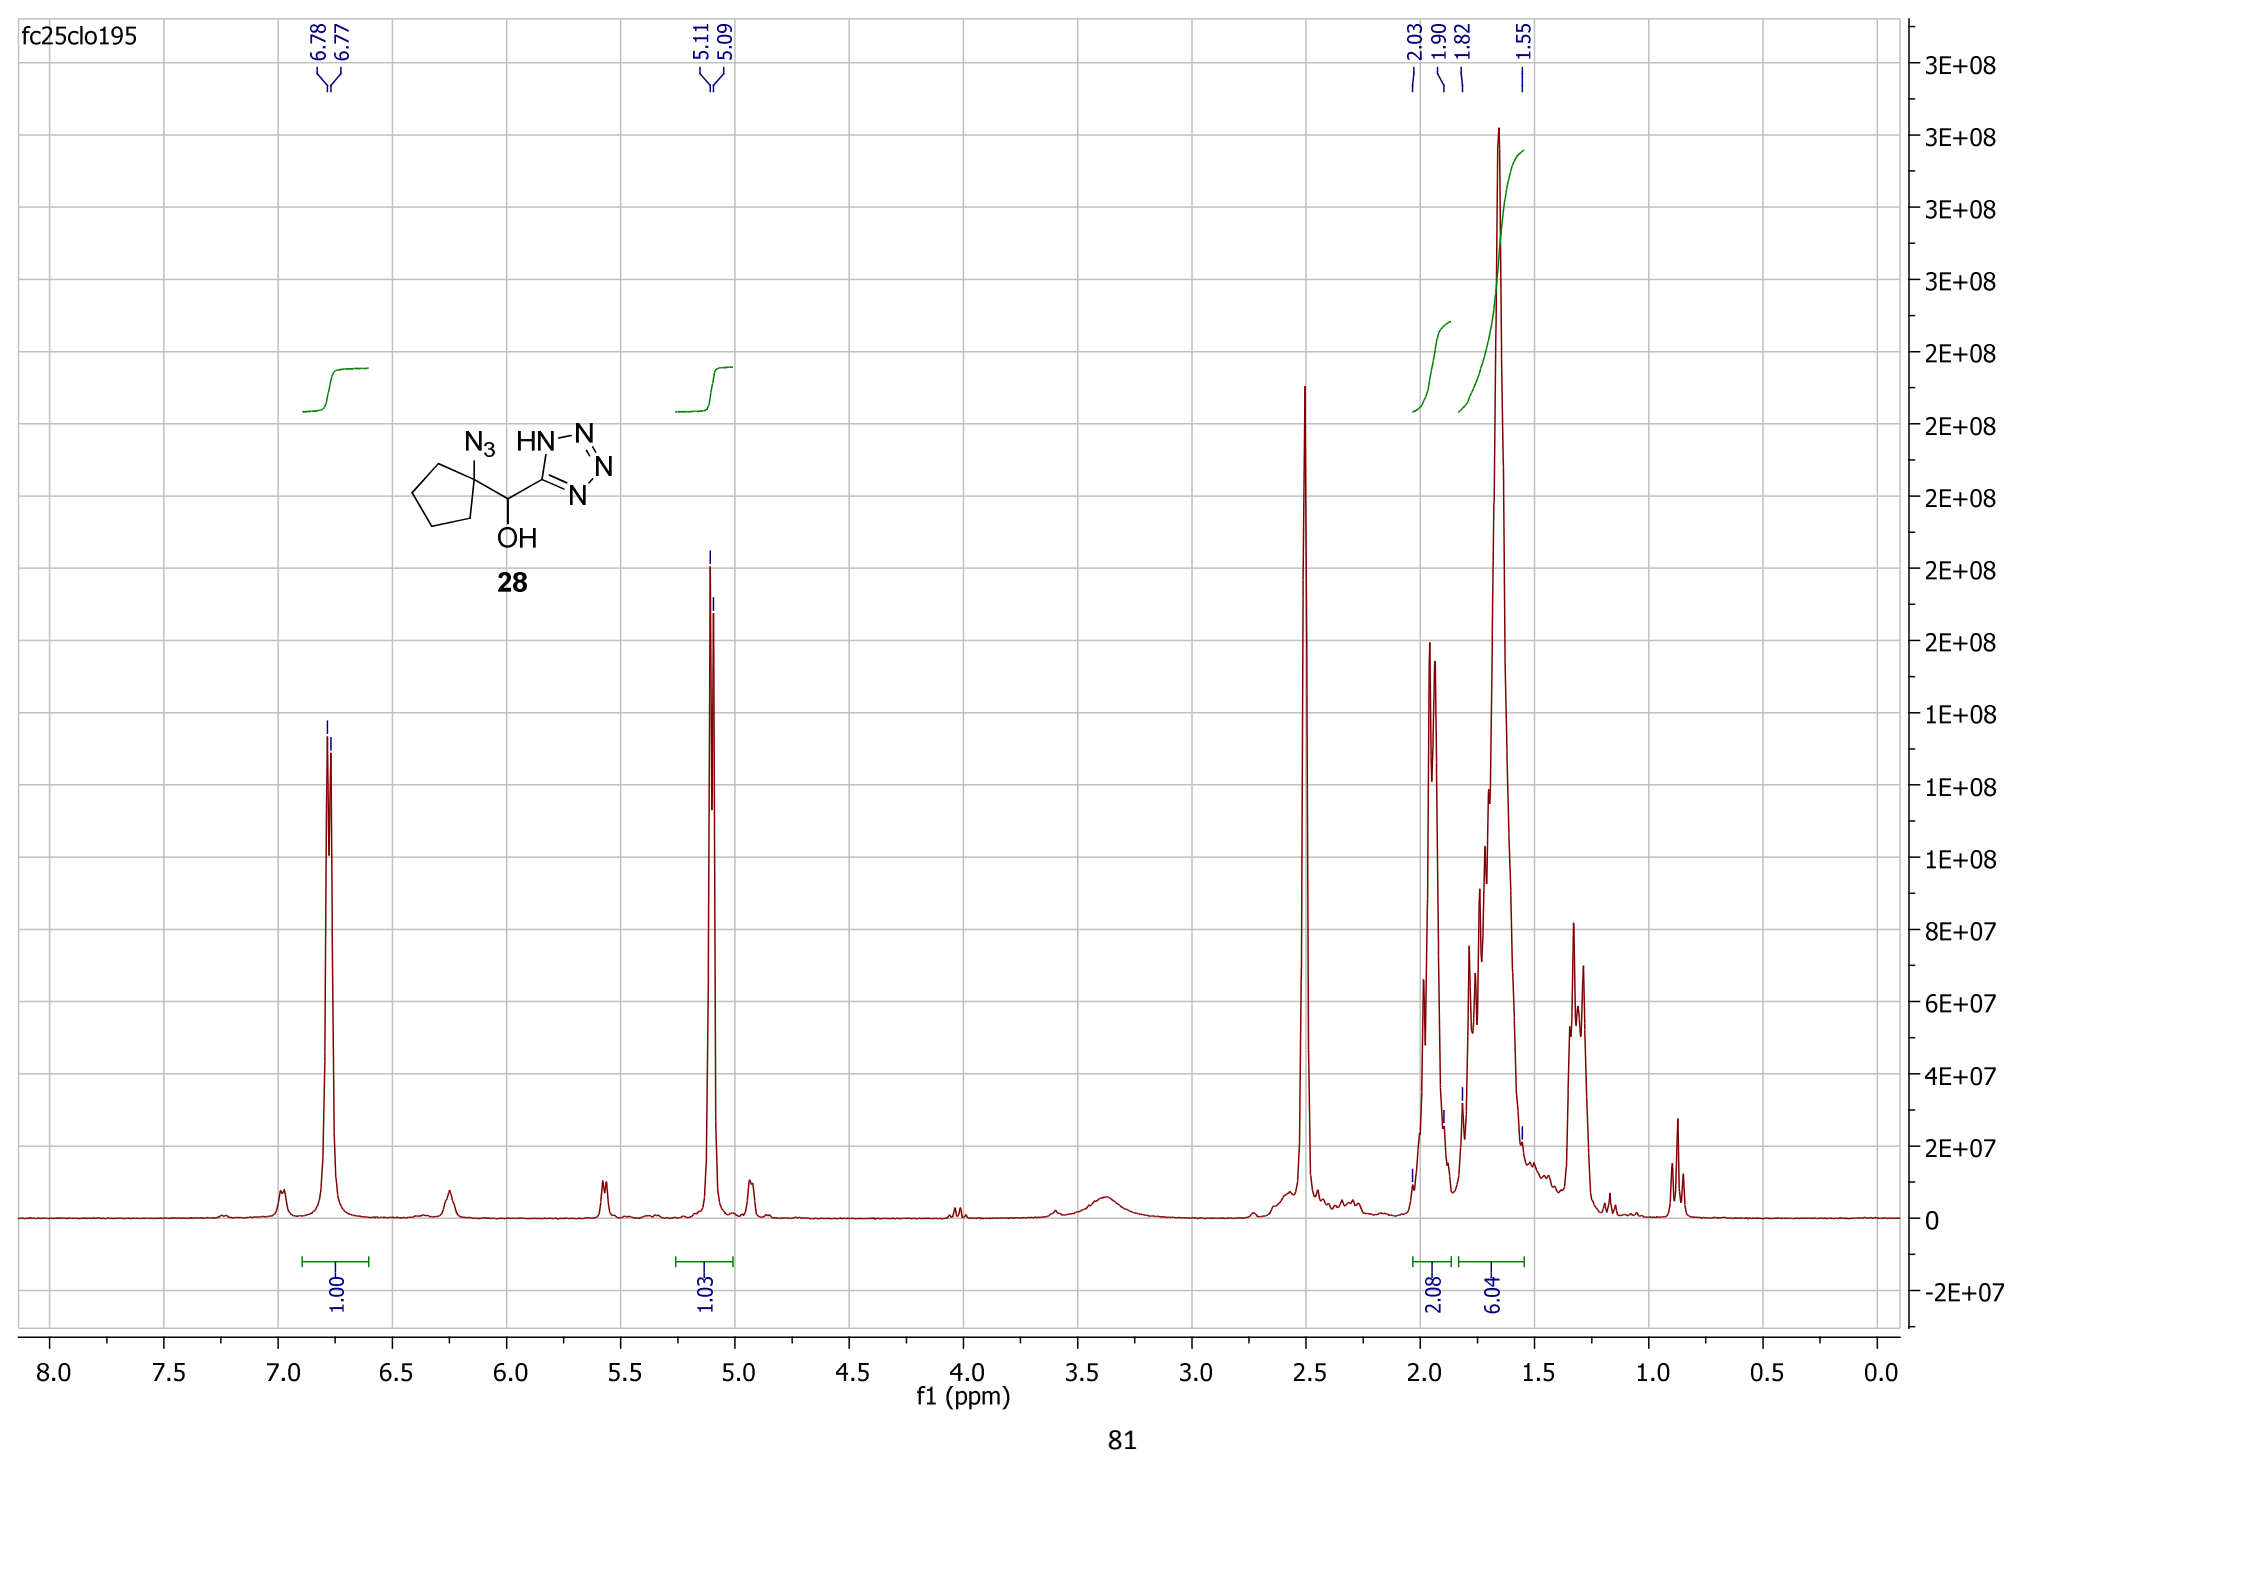

fc25clo195

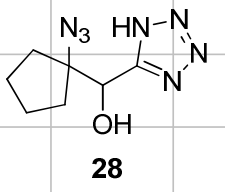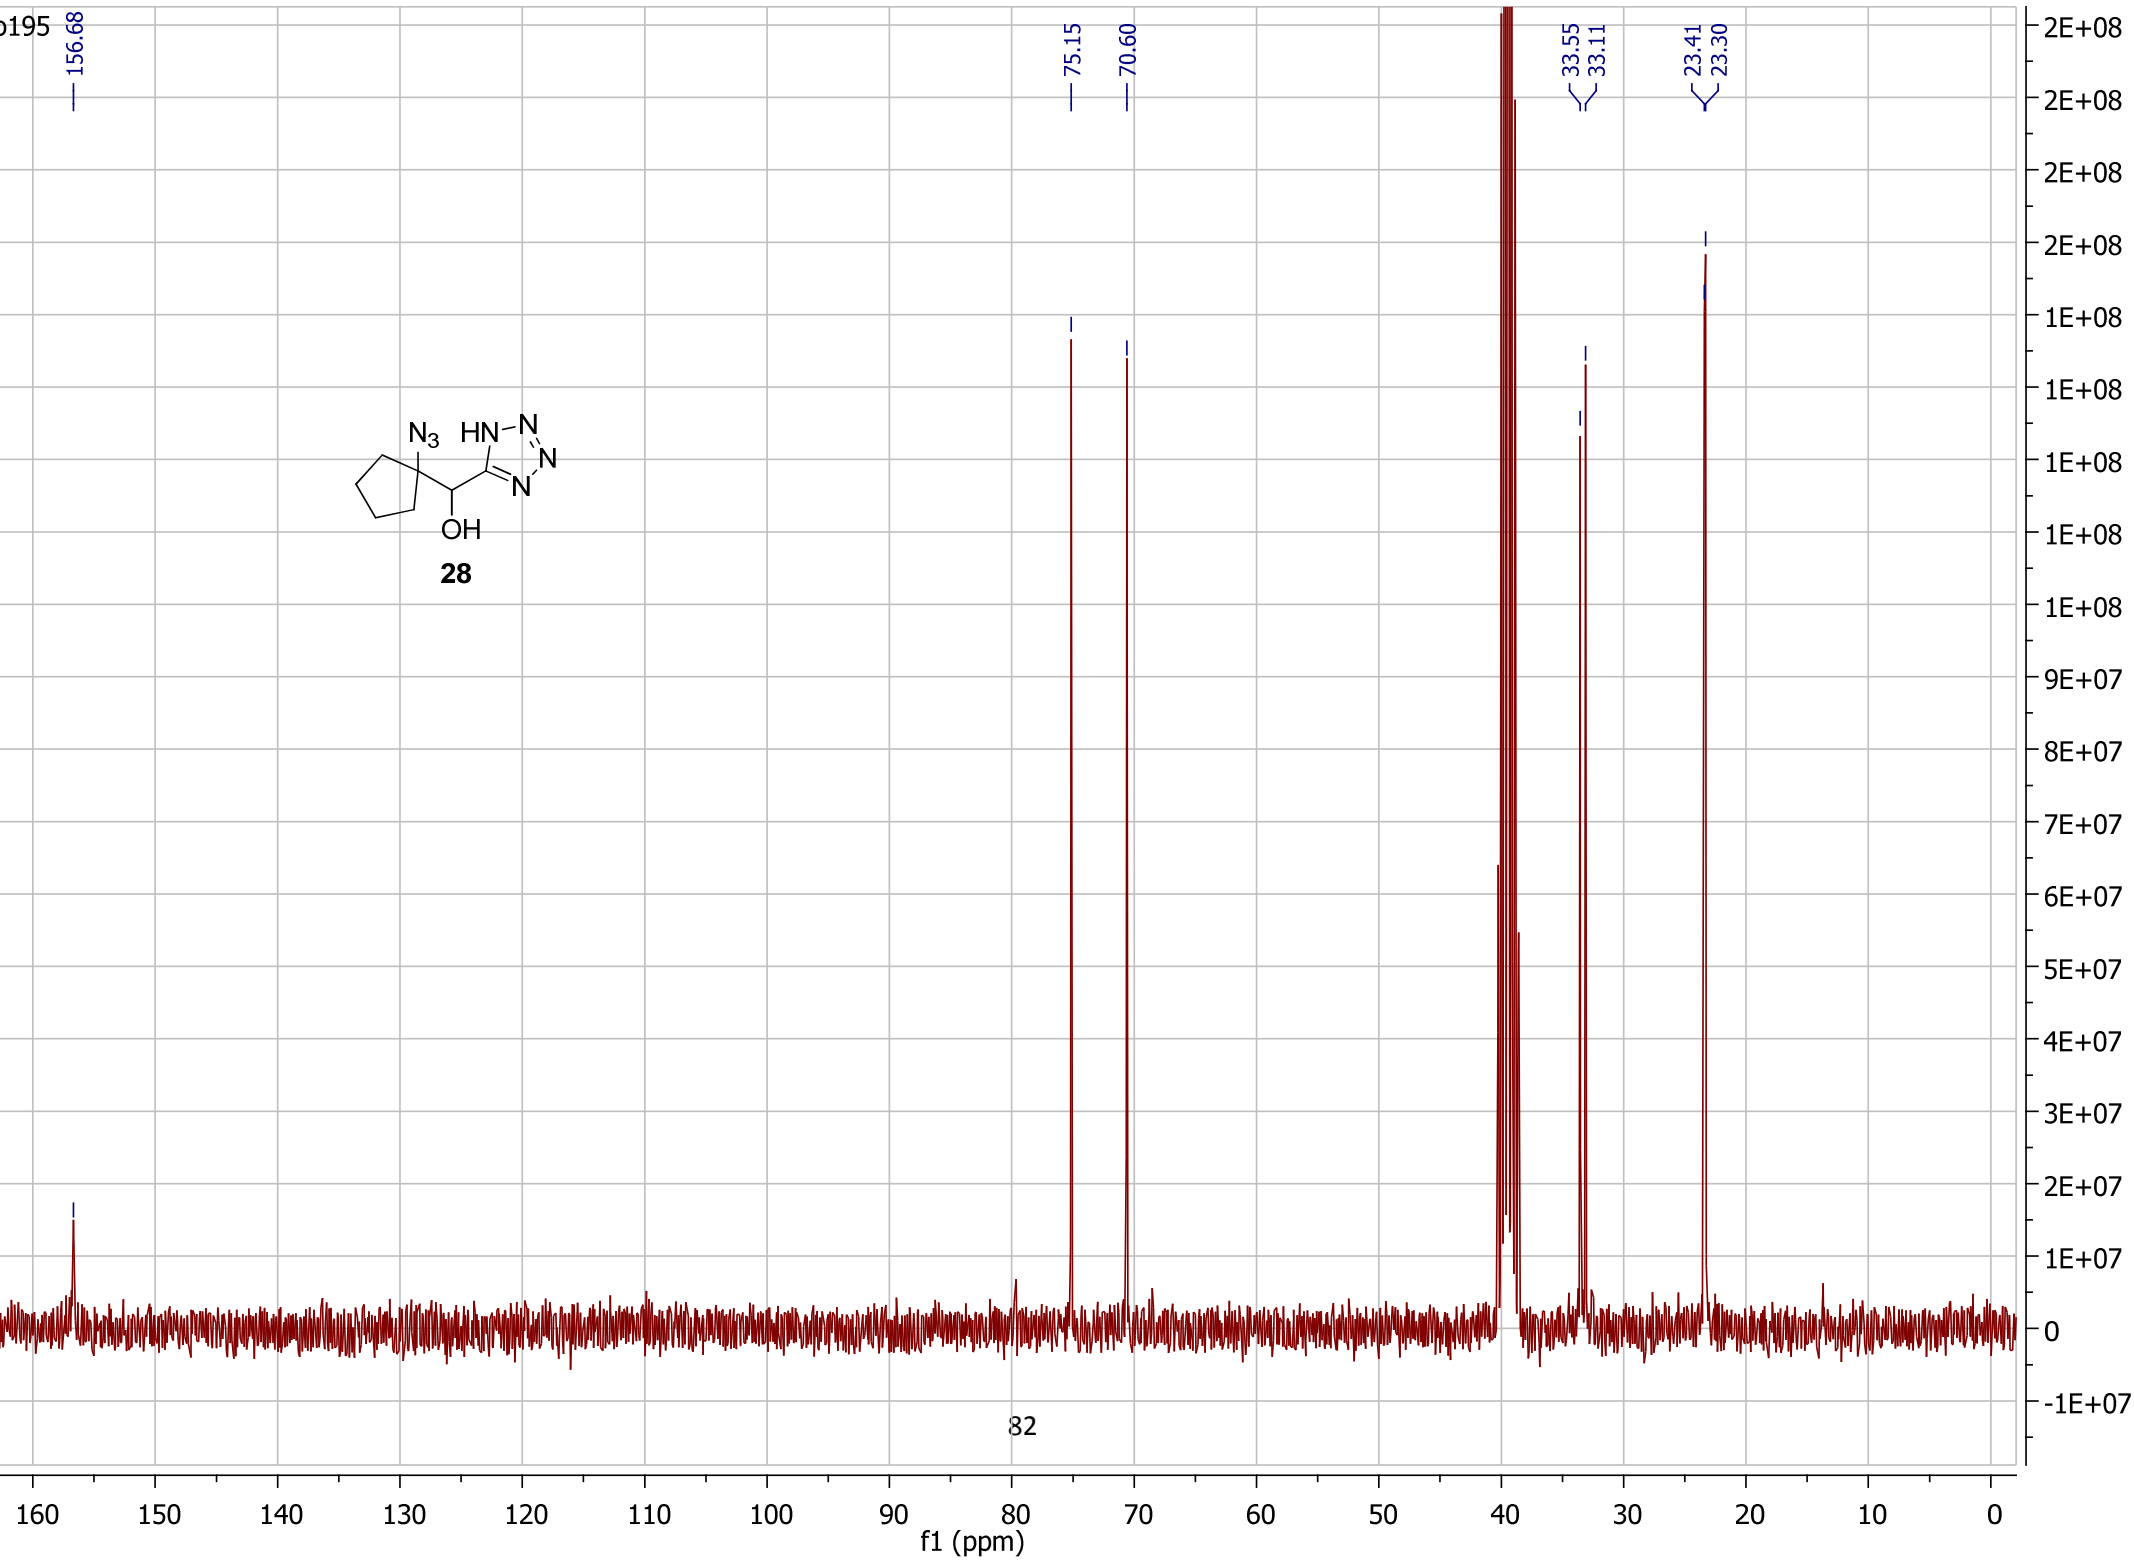

fc16clo178

6.81  
6.80

5.07  
5.06

2.12

1.17

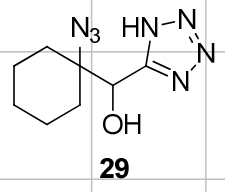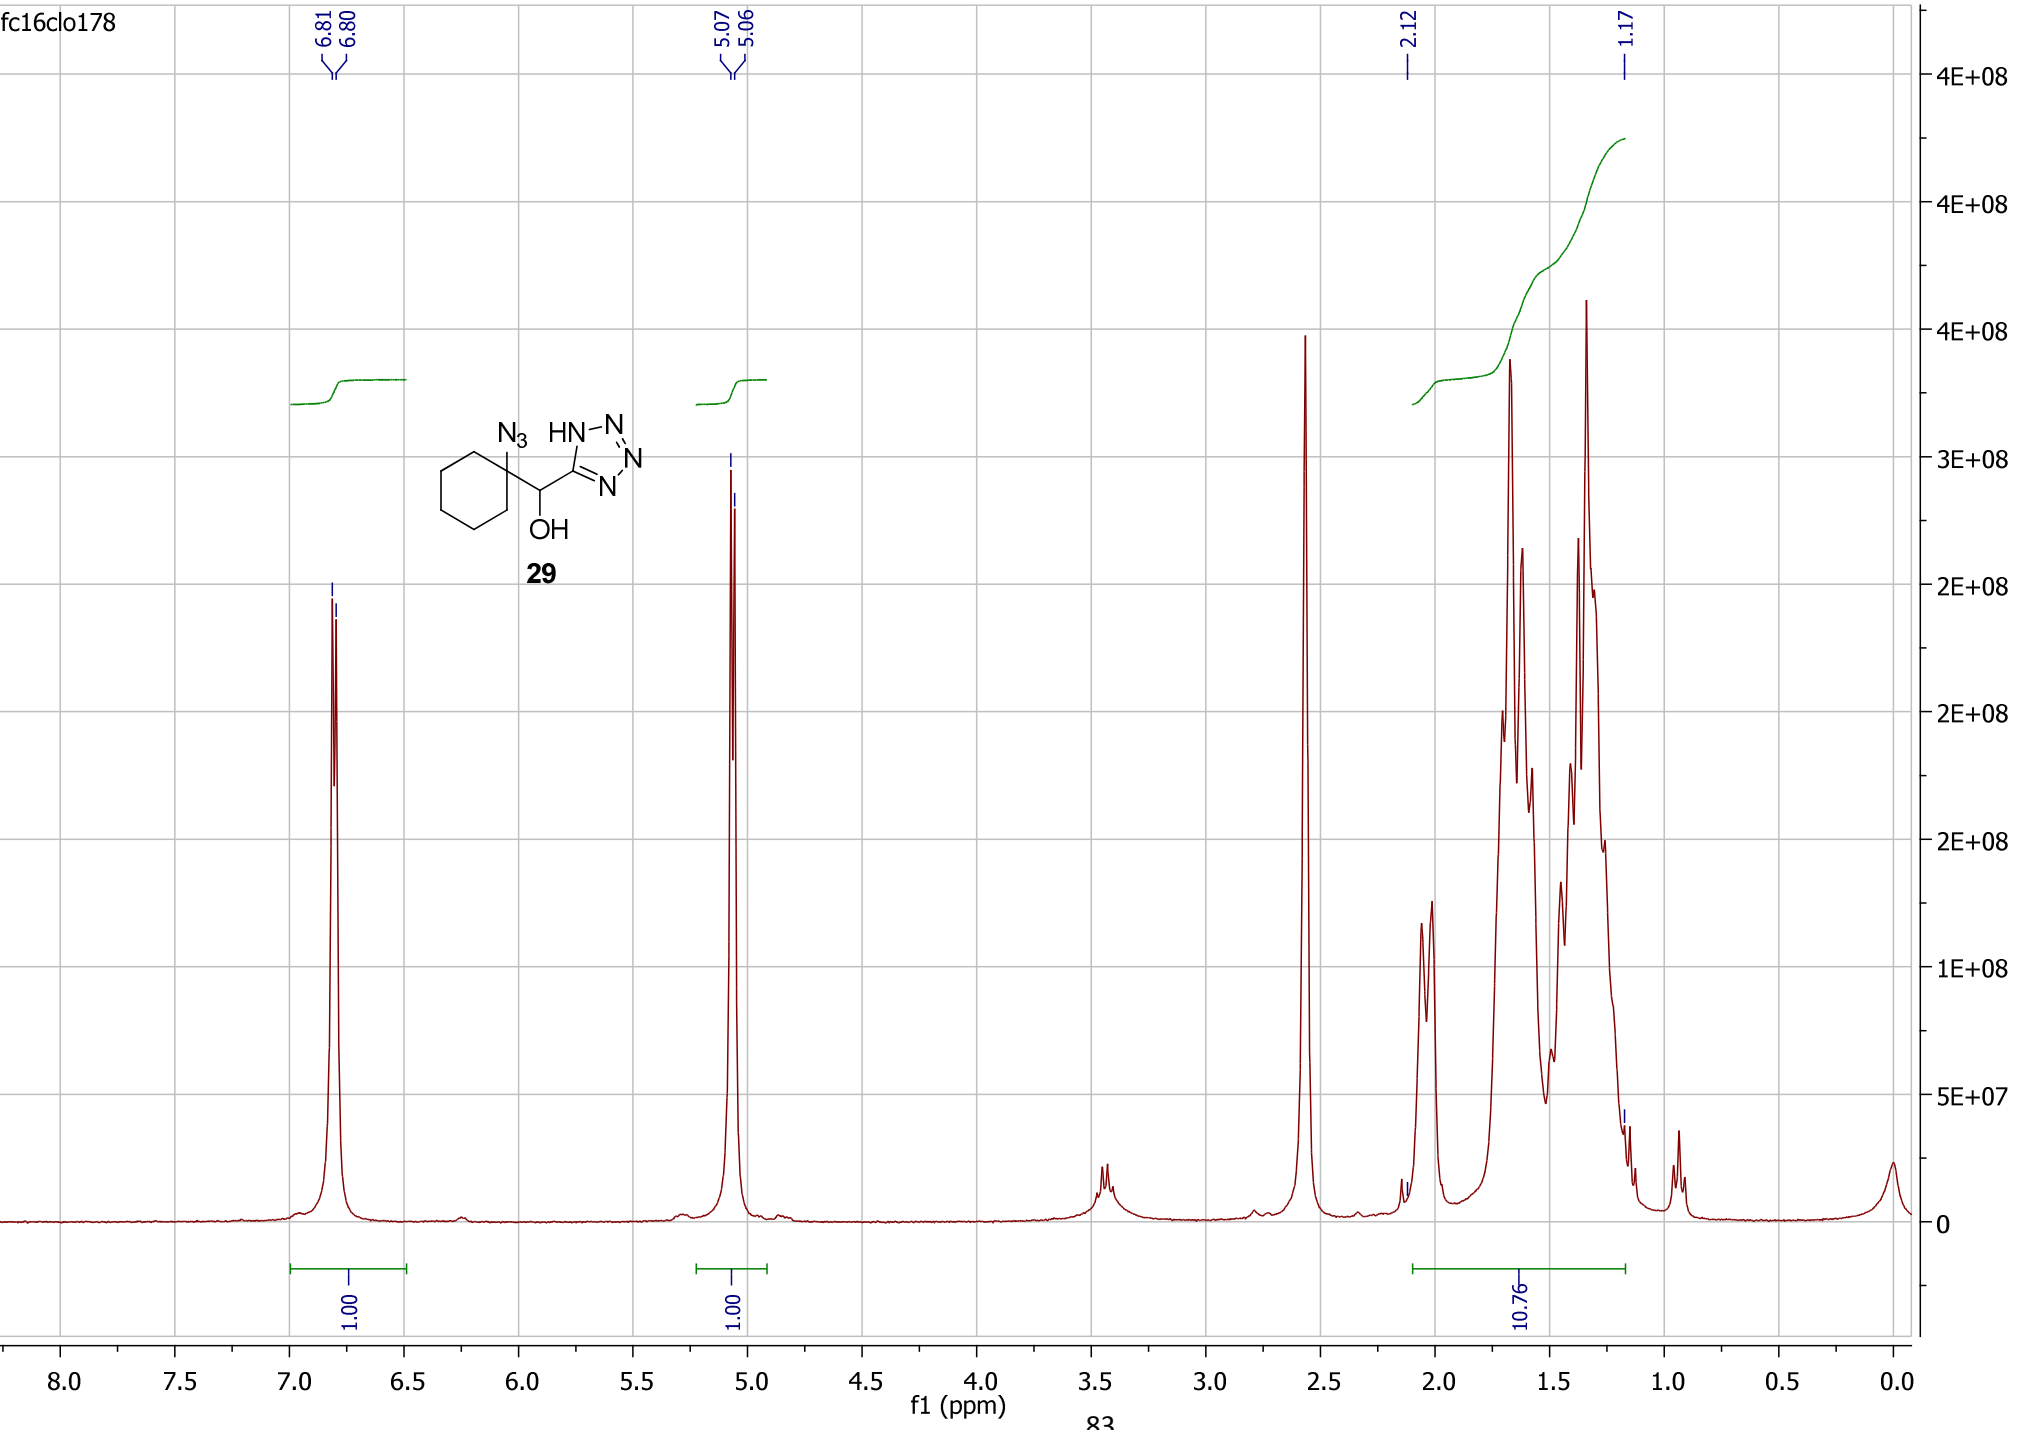

fc16clo178

156.01

71.40

65.48

30.23

29.77

24.54

21.39

21.14

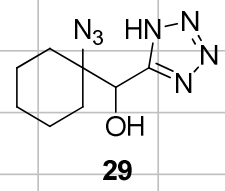

84

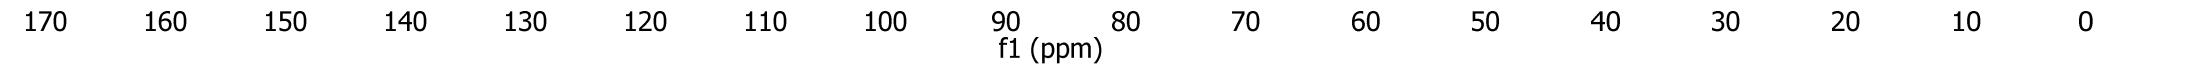

fc25clo197

6.82  
6.80

5.00  
4.99

2.16  
1.96  
1.91  
1.74  
1.67

1.23

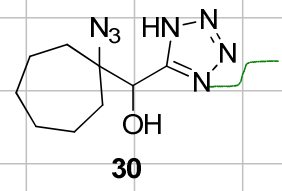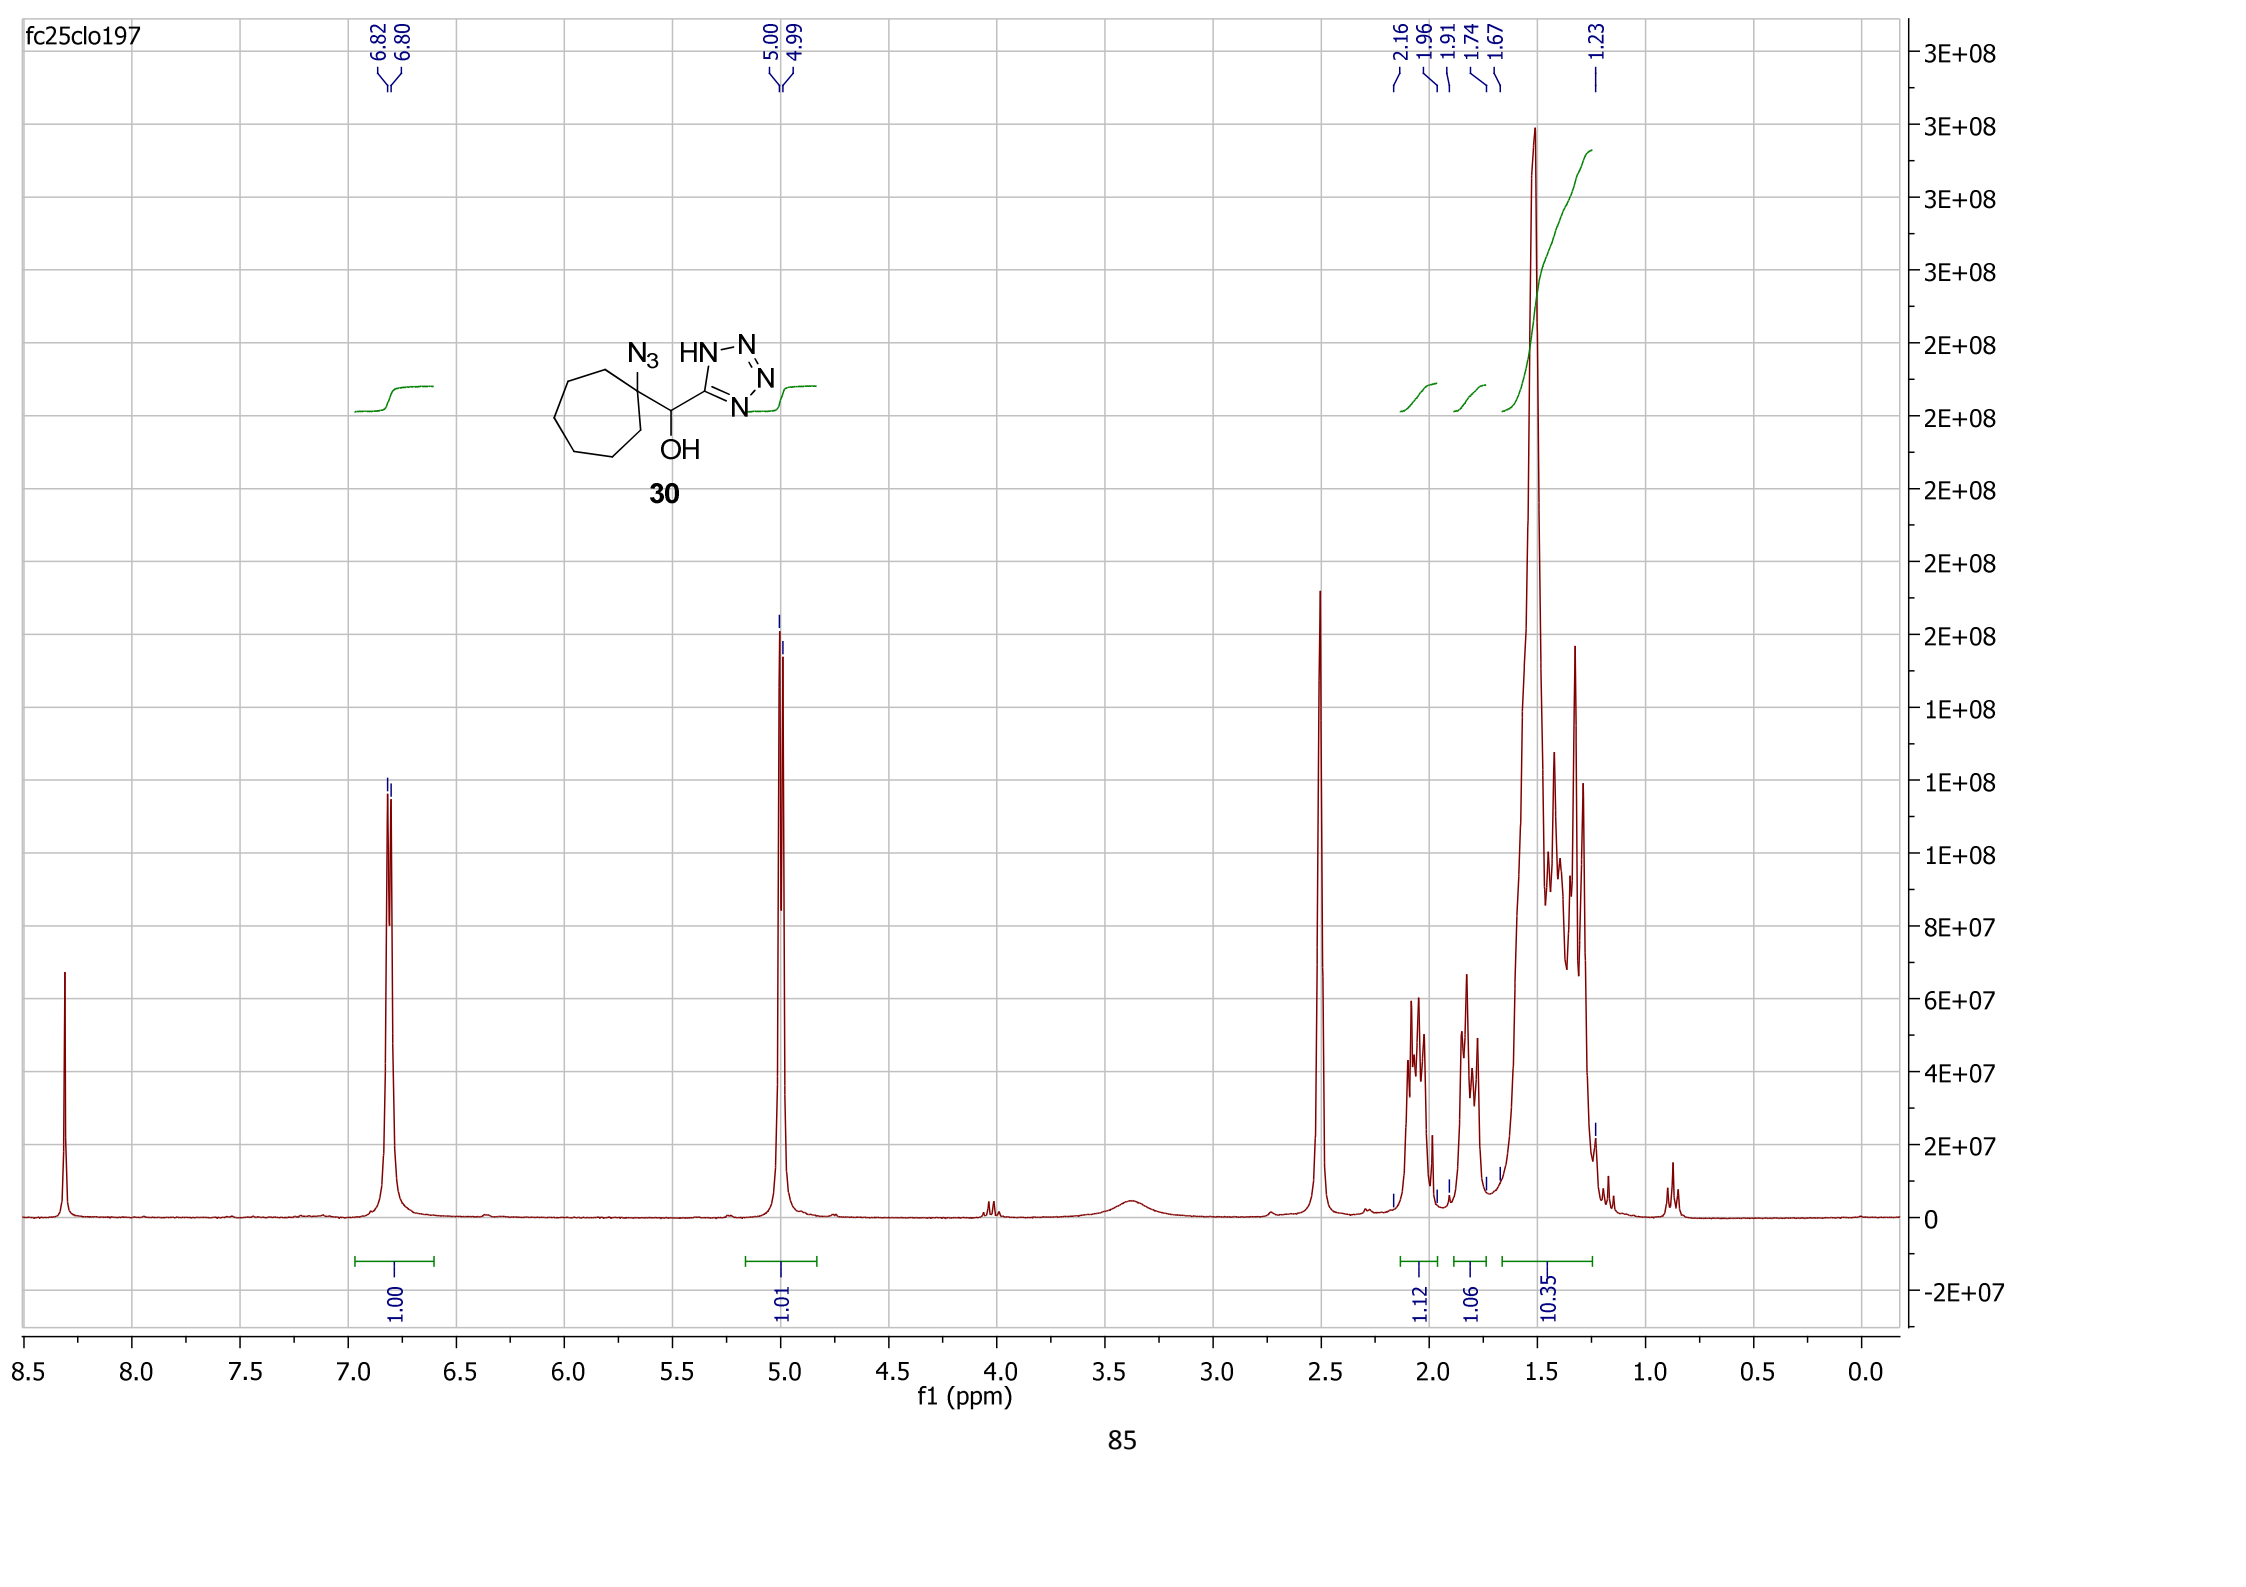

fc25cl031

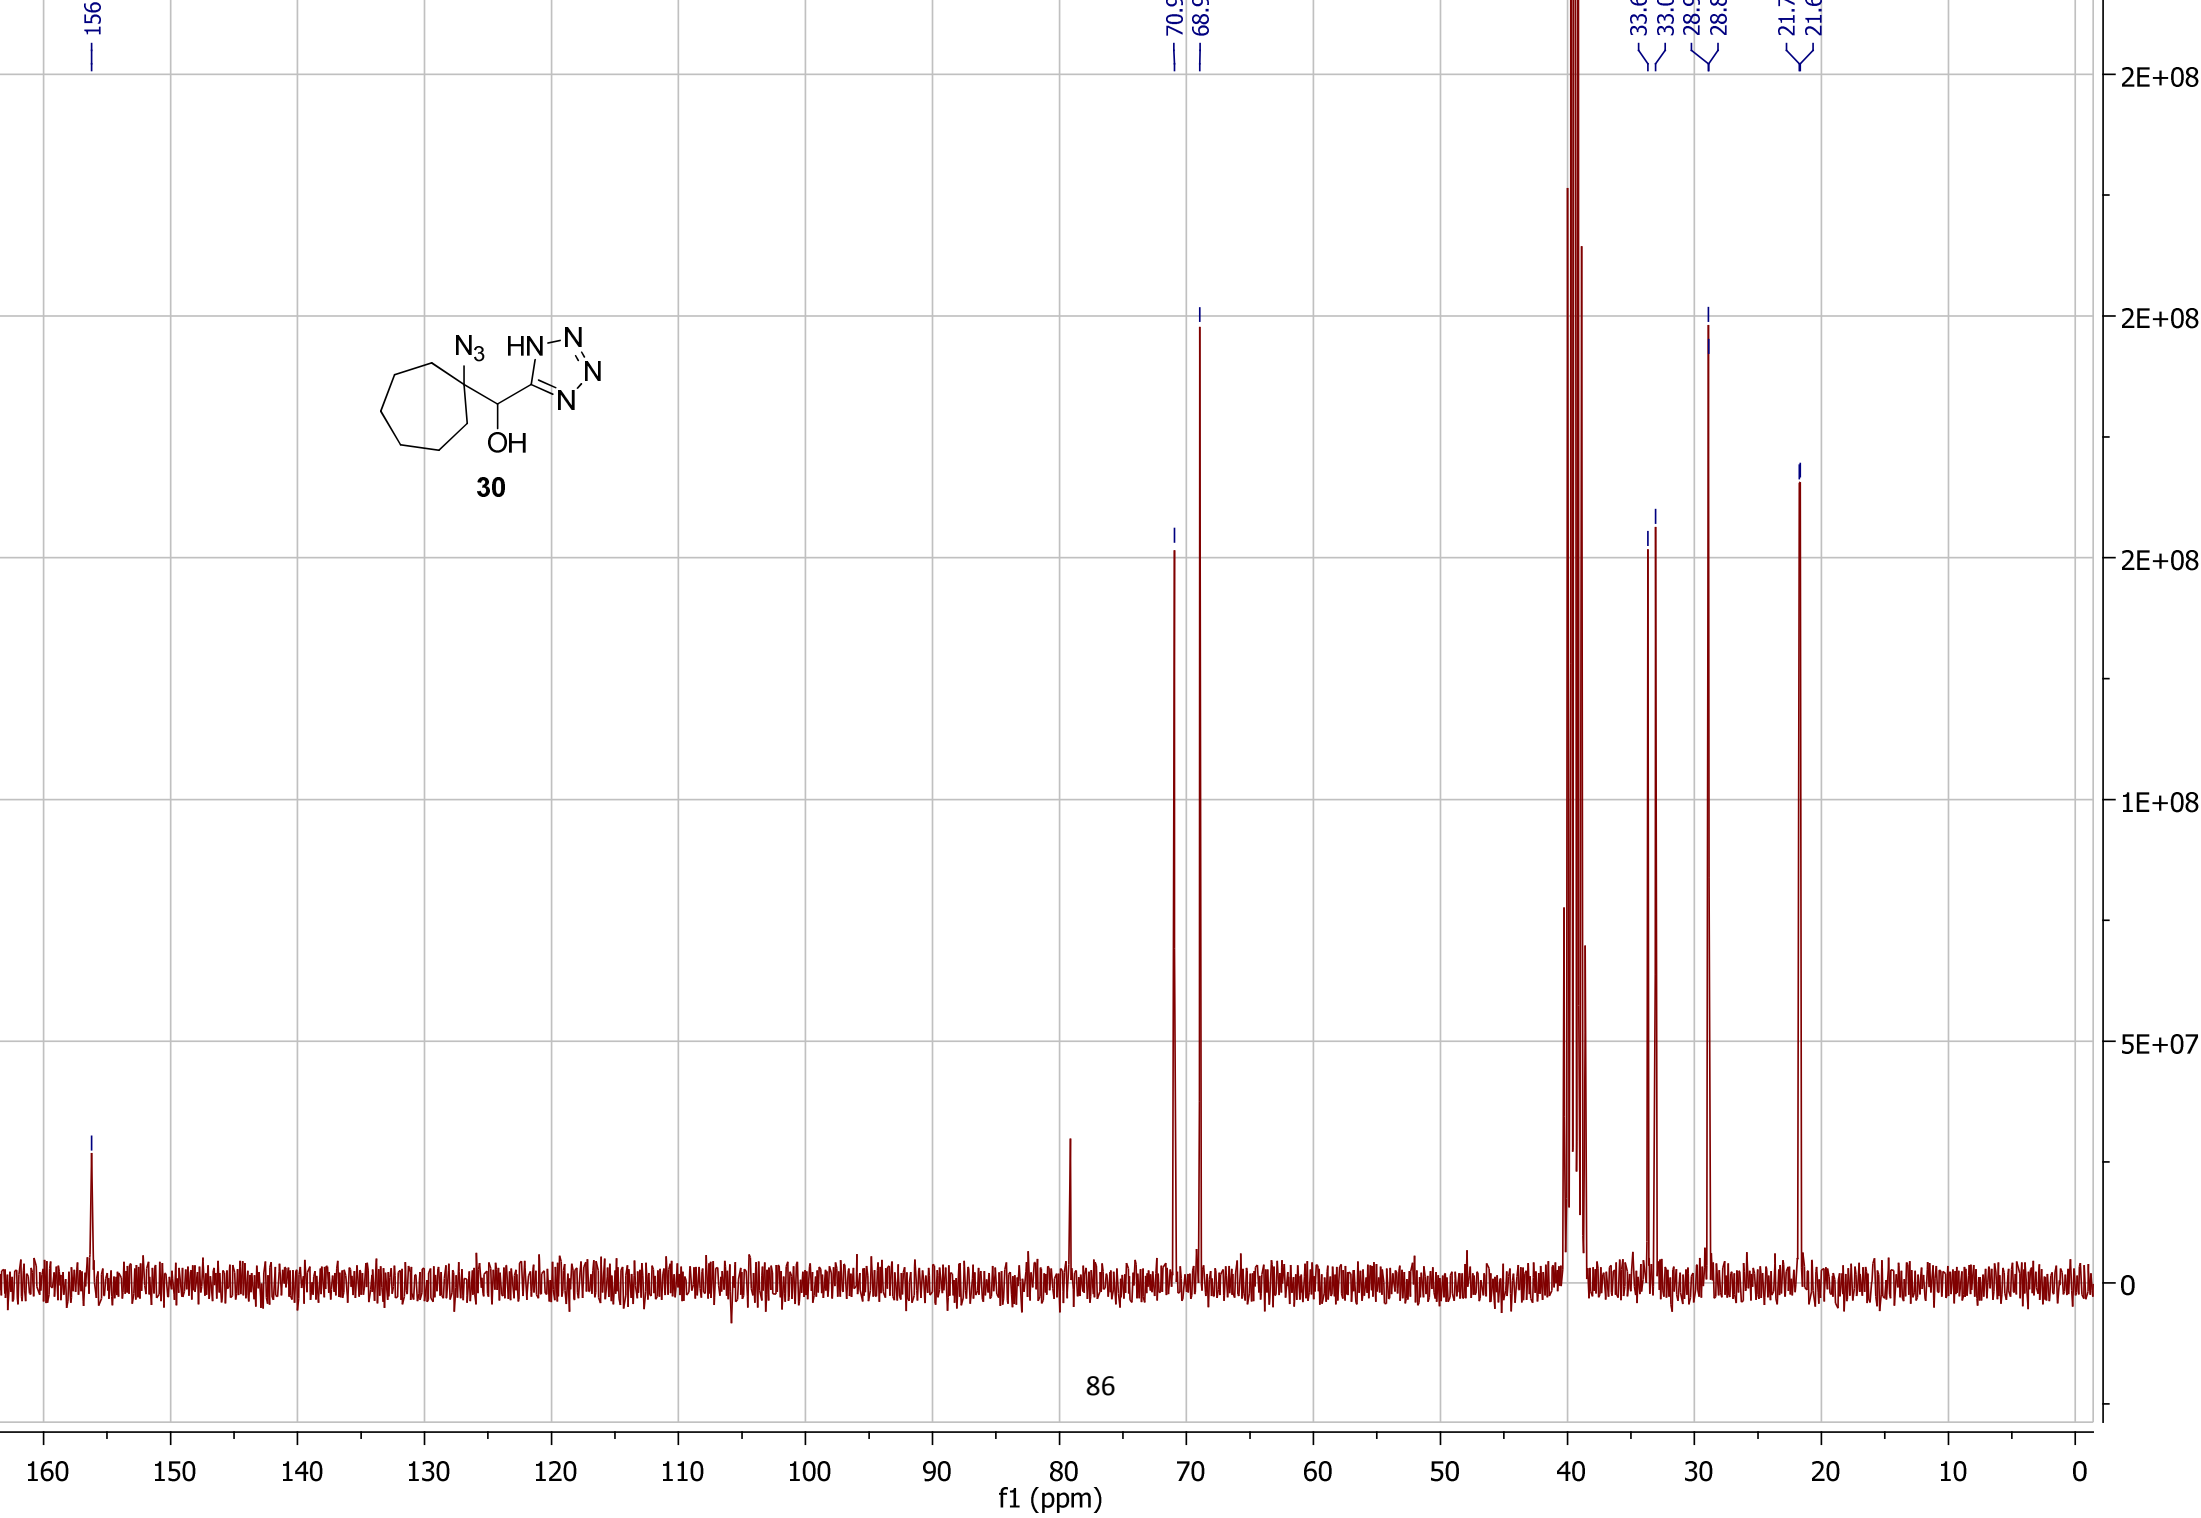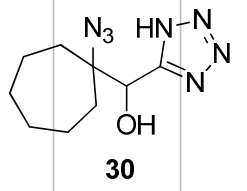

fc25clo196

6.76  
6.75

5.06  
5.05

2.12

1.91

1.71

1.29

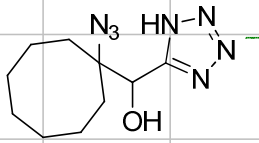

31

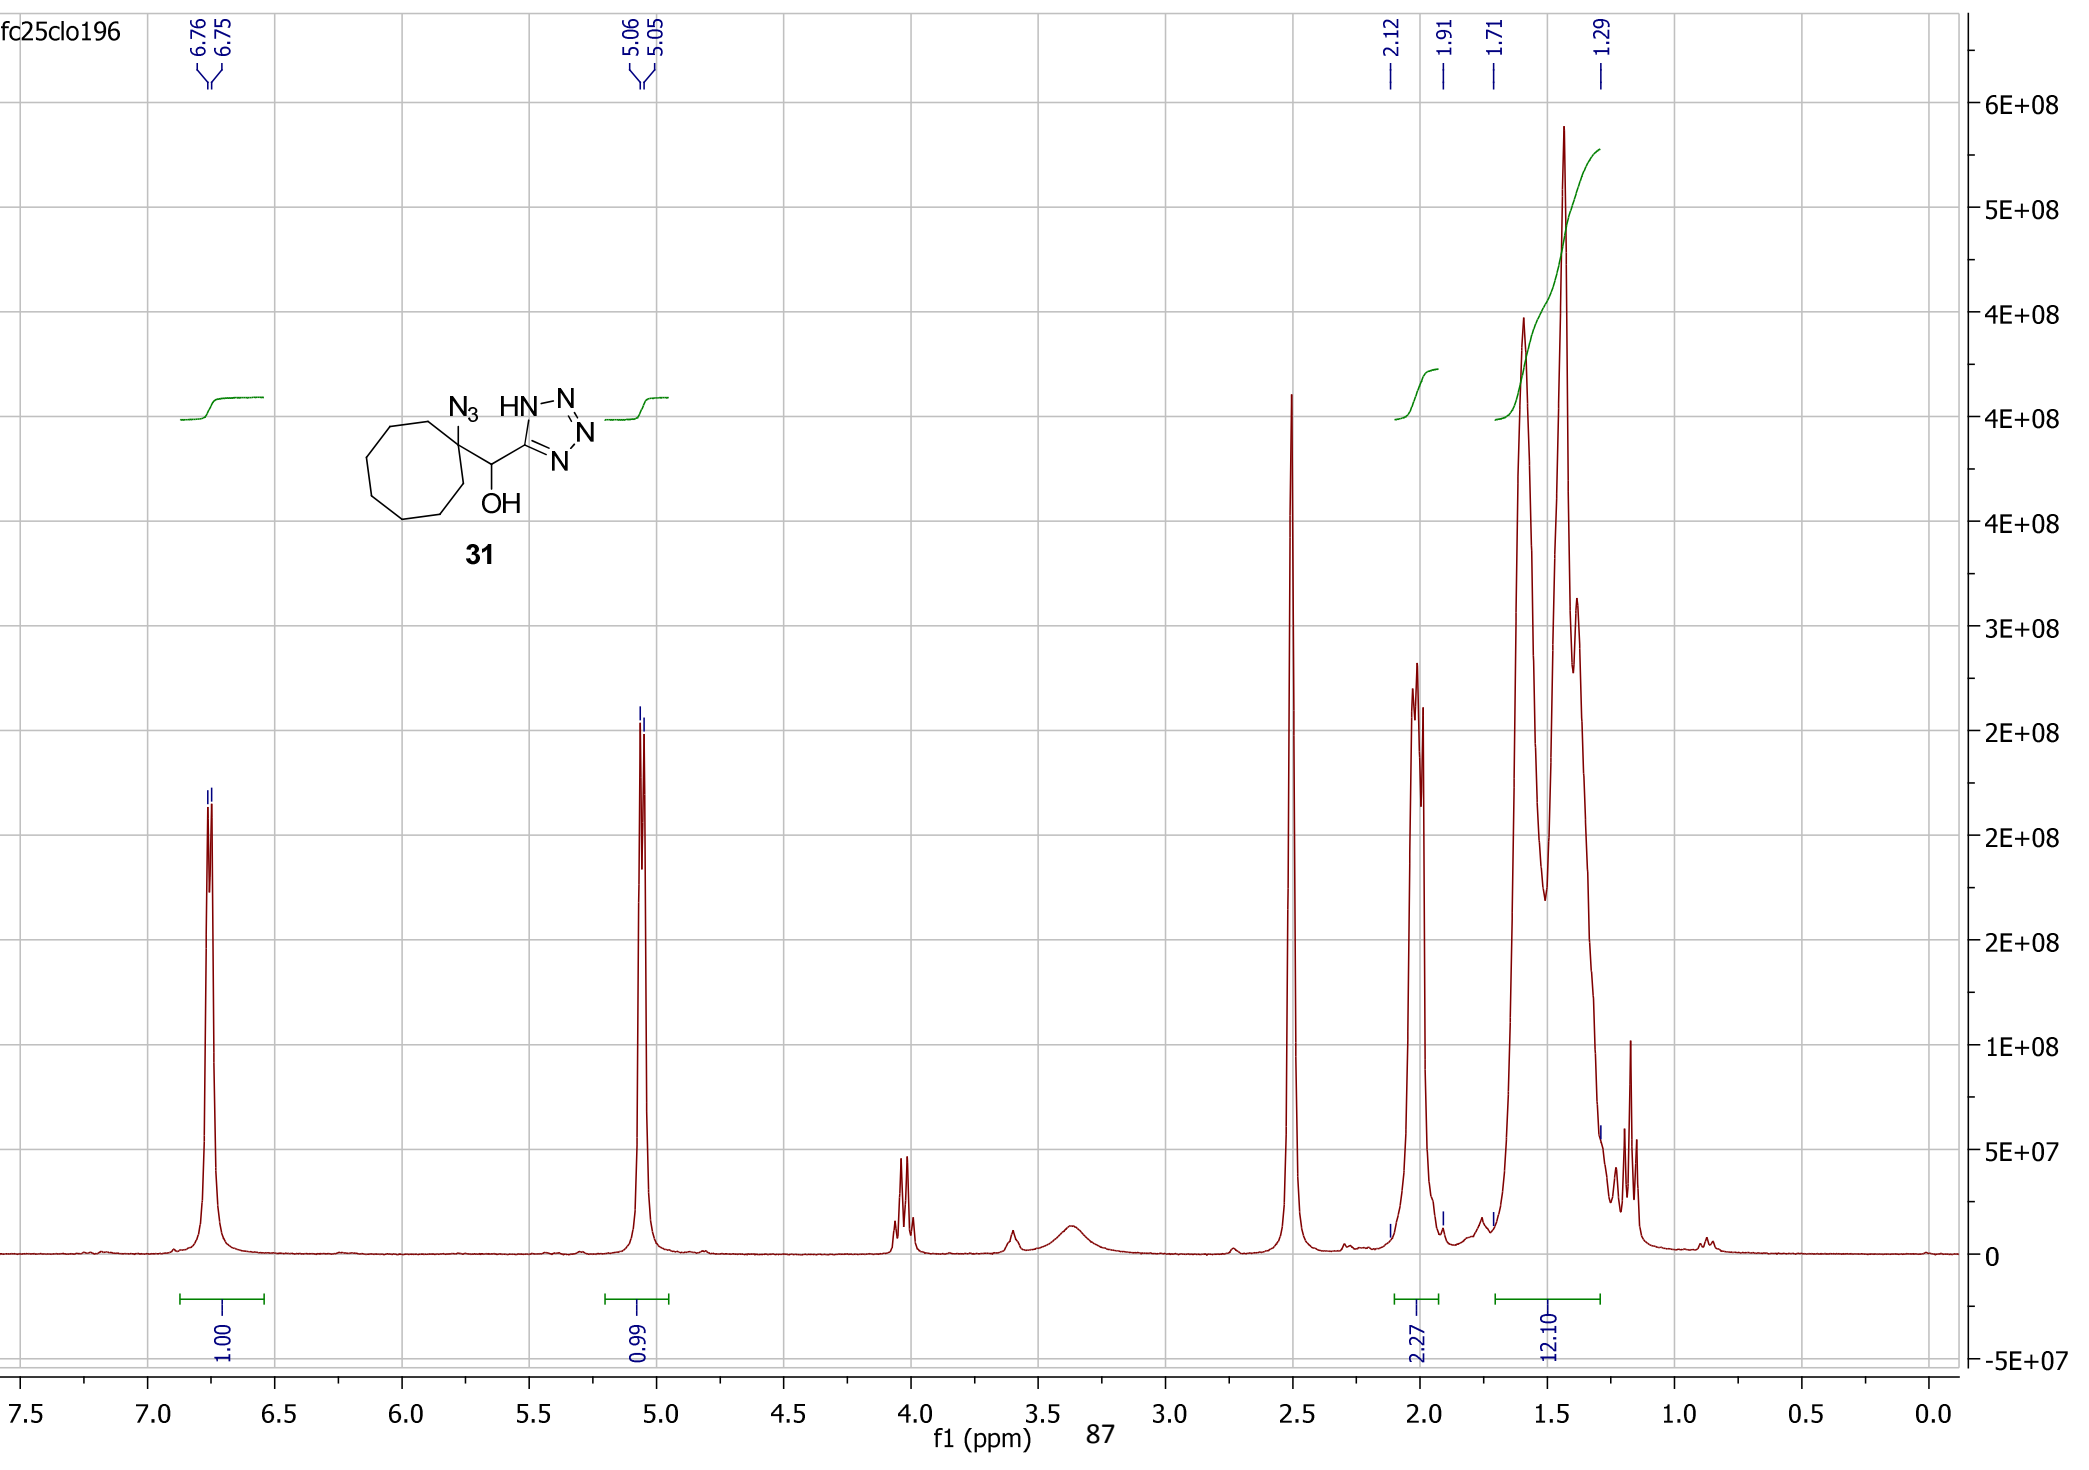

1.00

0.99

2.27

12.10

7.5 7.0 6.5 6.0 5.5 5.0 4.5 4.0 3.5 3.0 2.5 2.0 1.5 1.0 0.5 0.0

f1 (ppm) 87

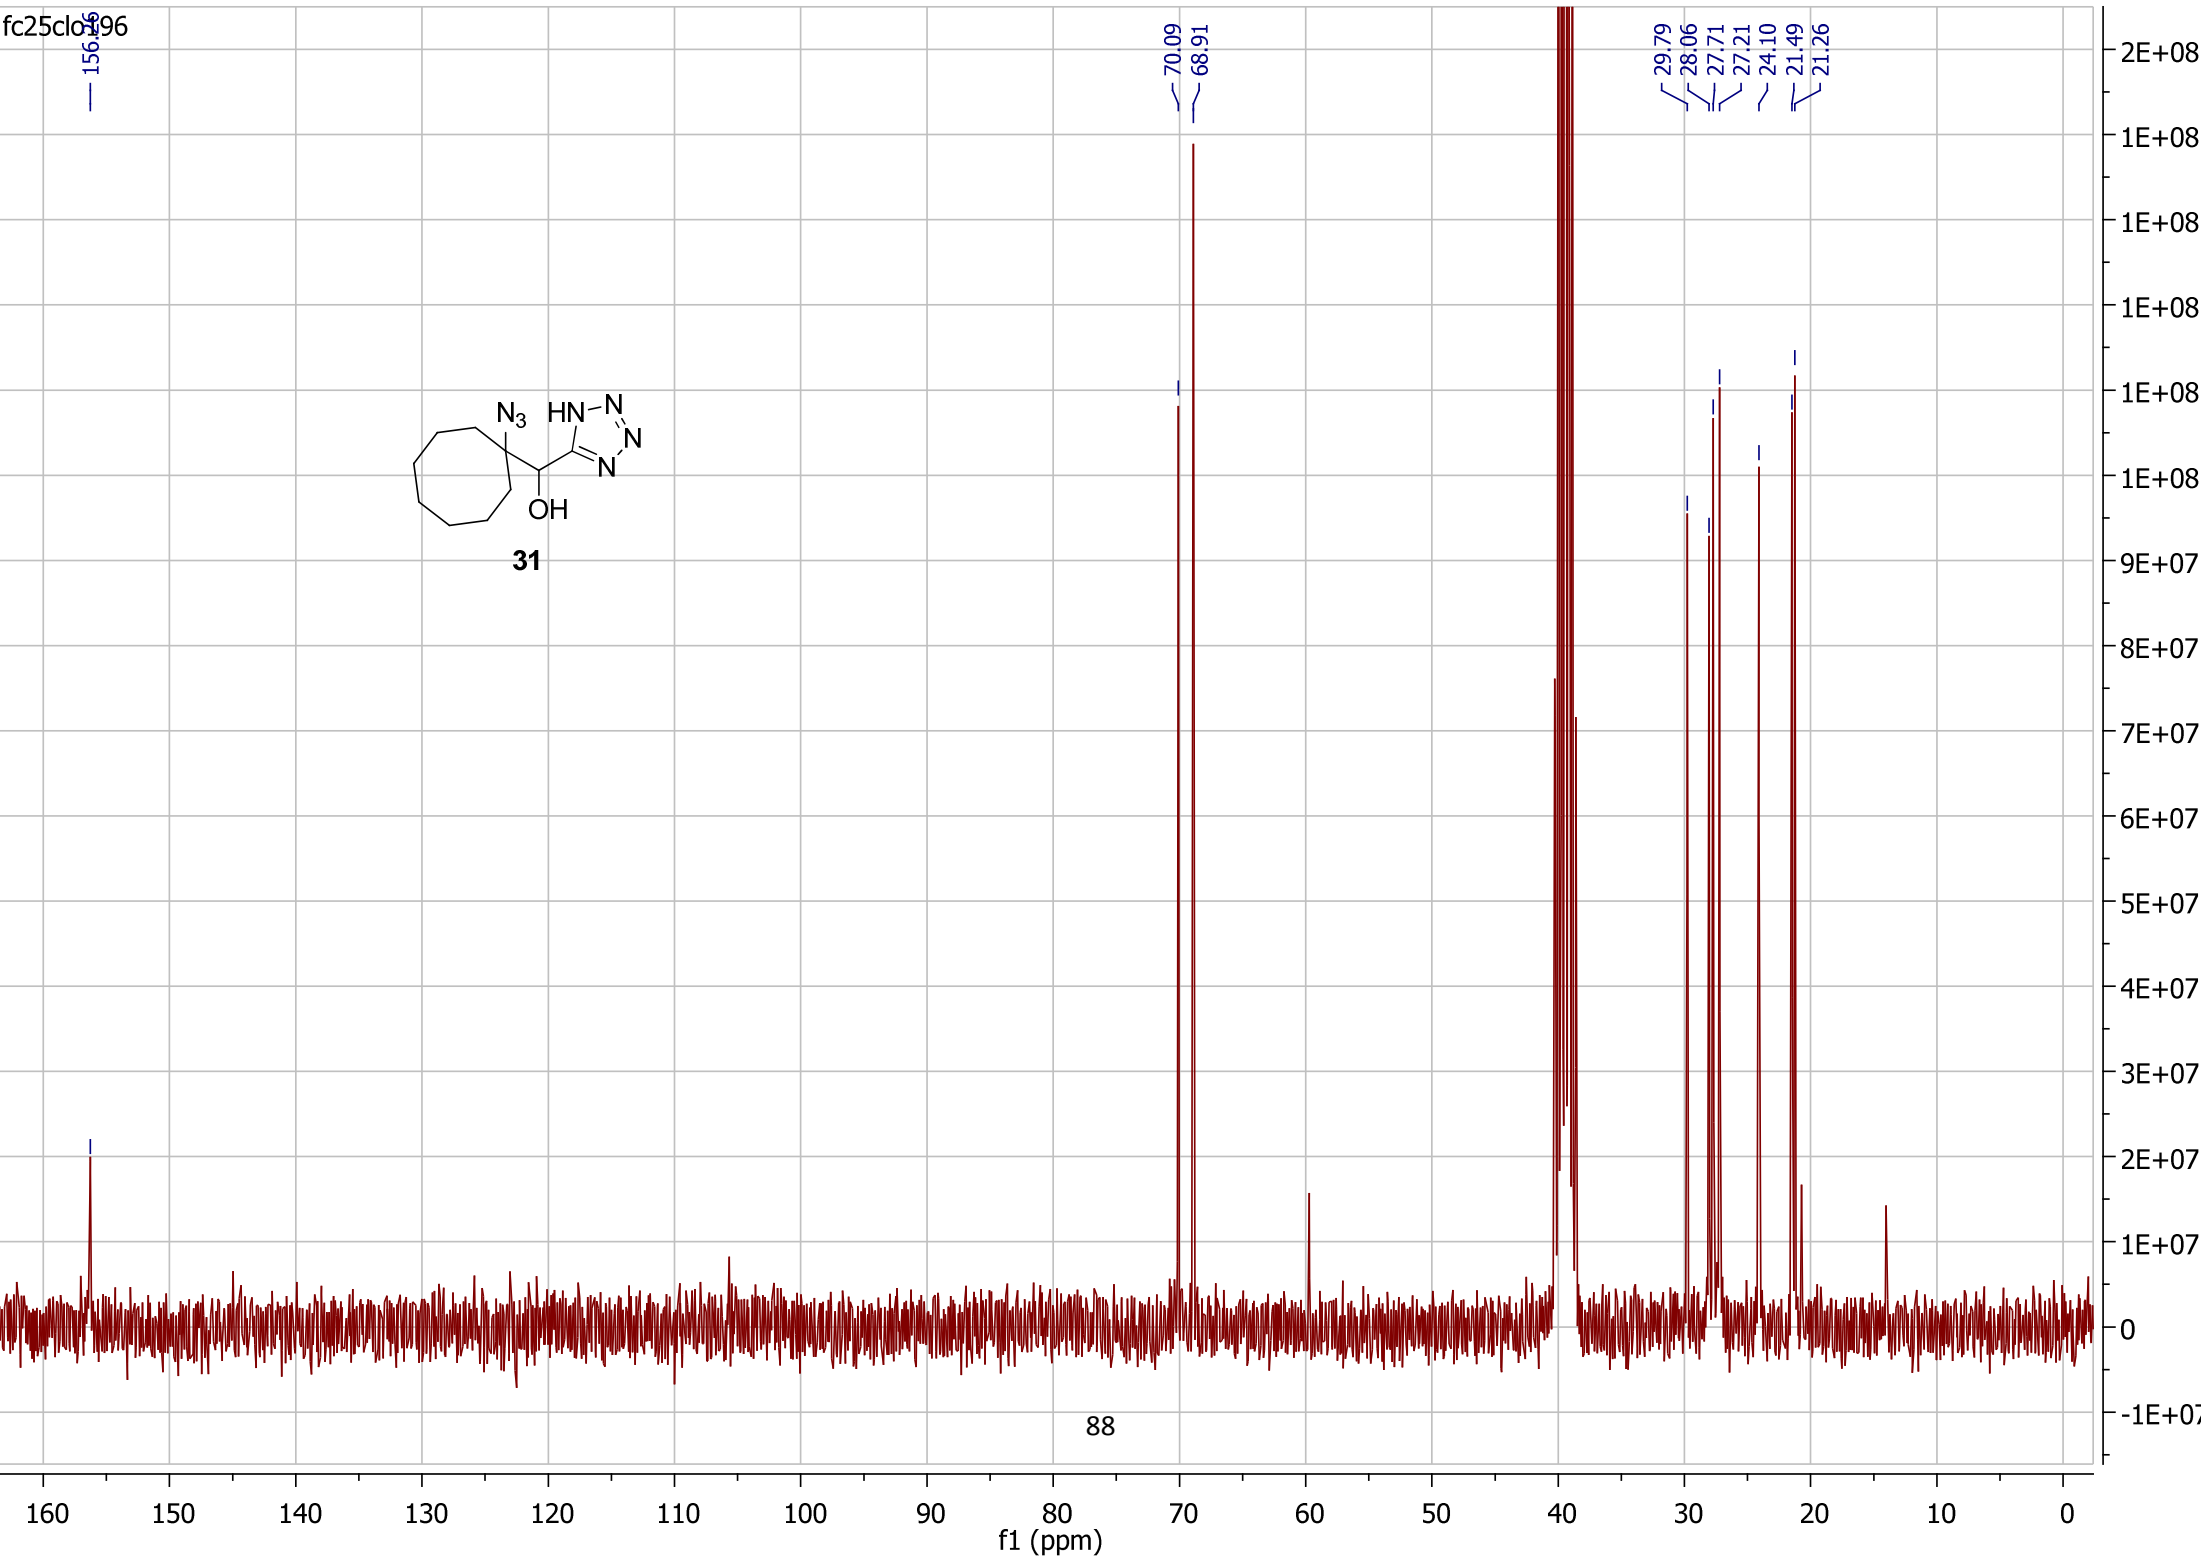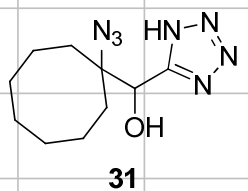

88



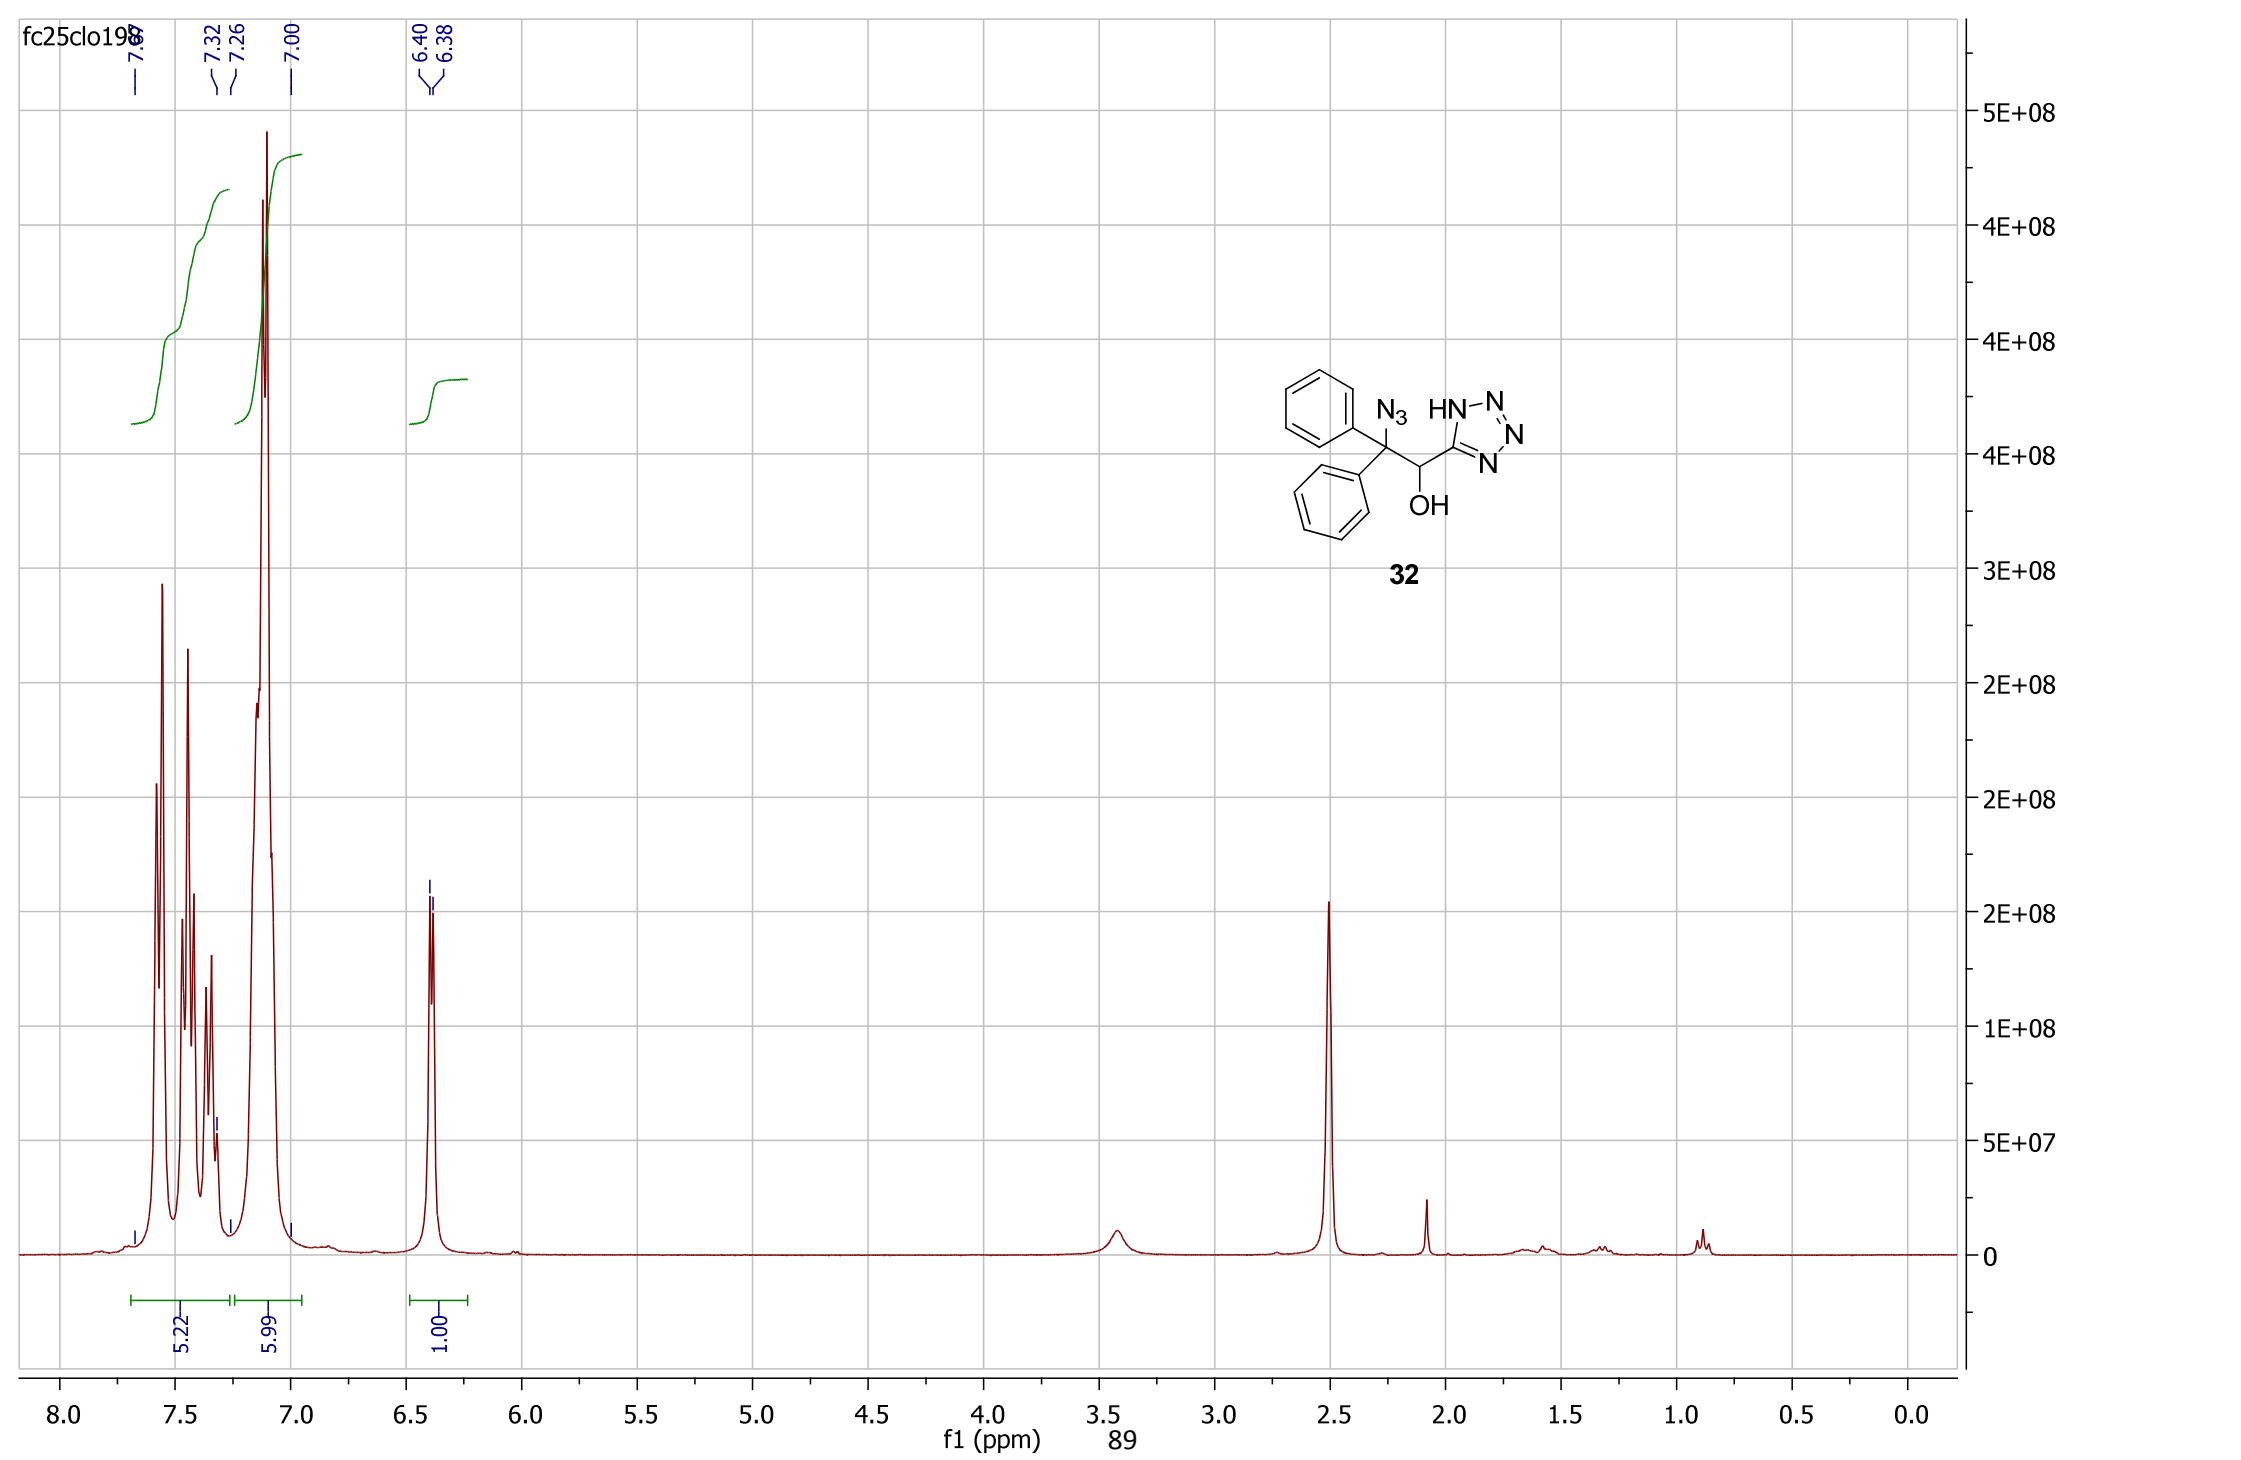

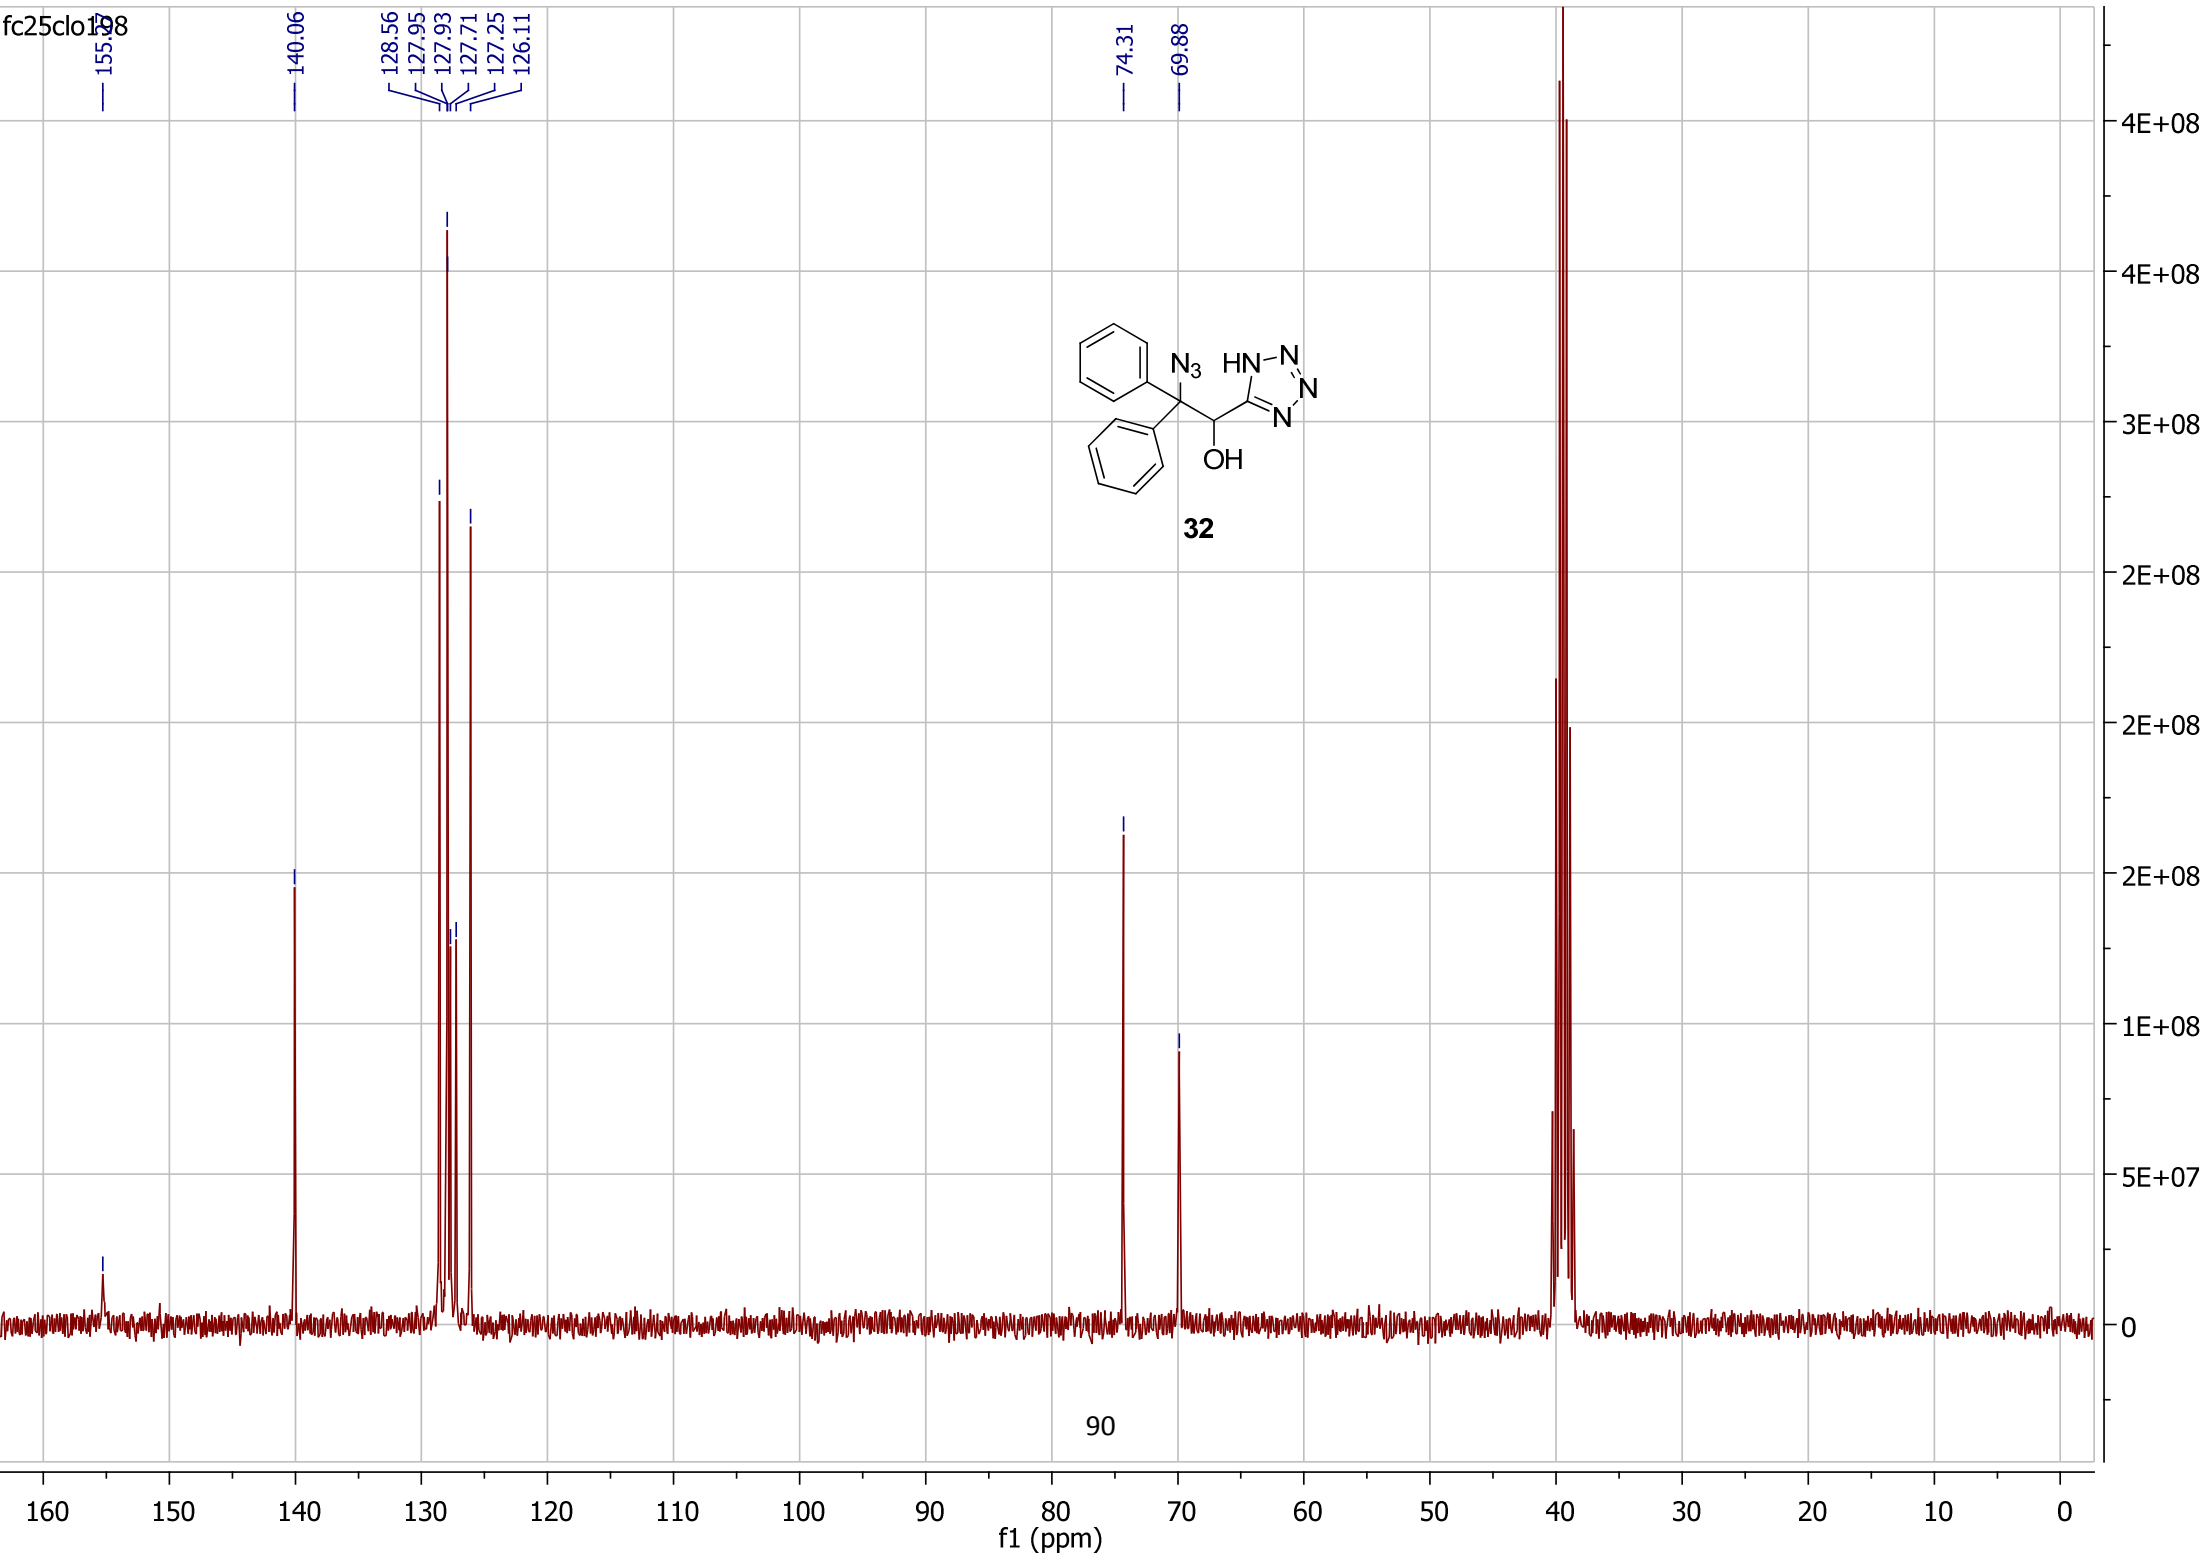

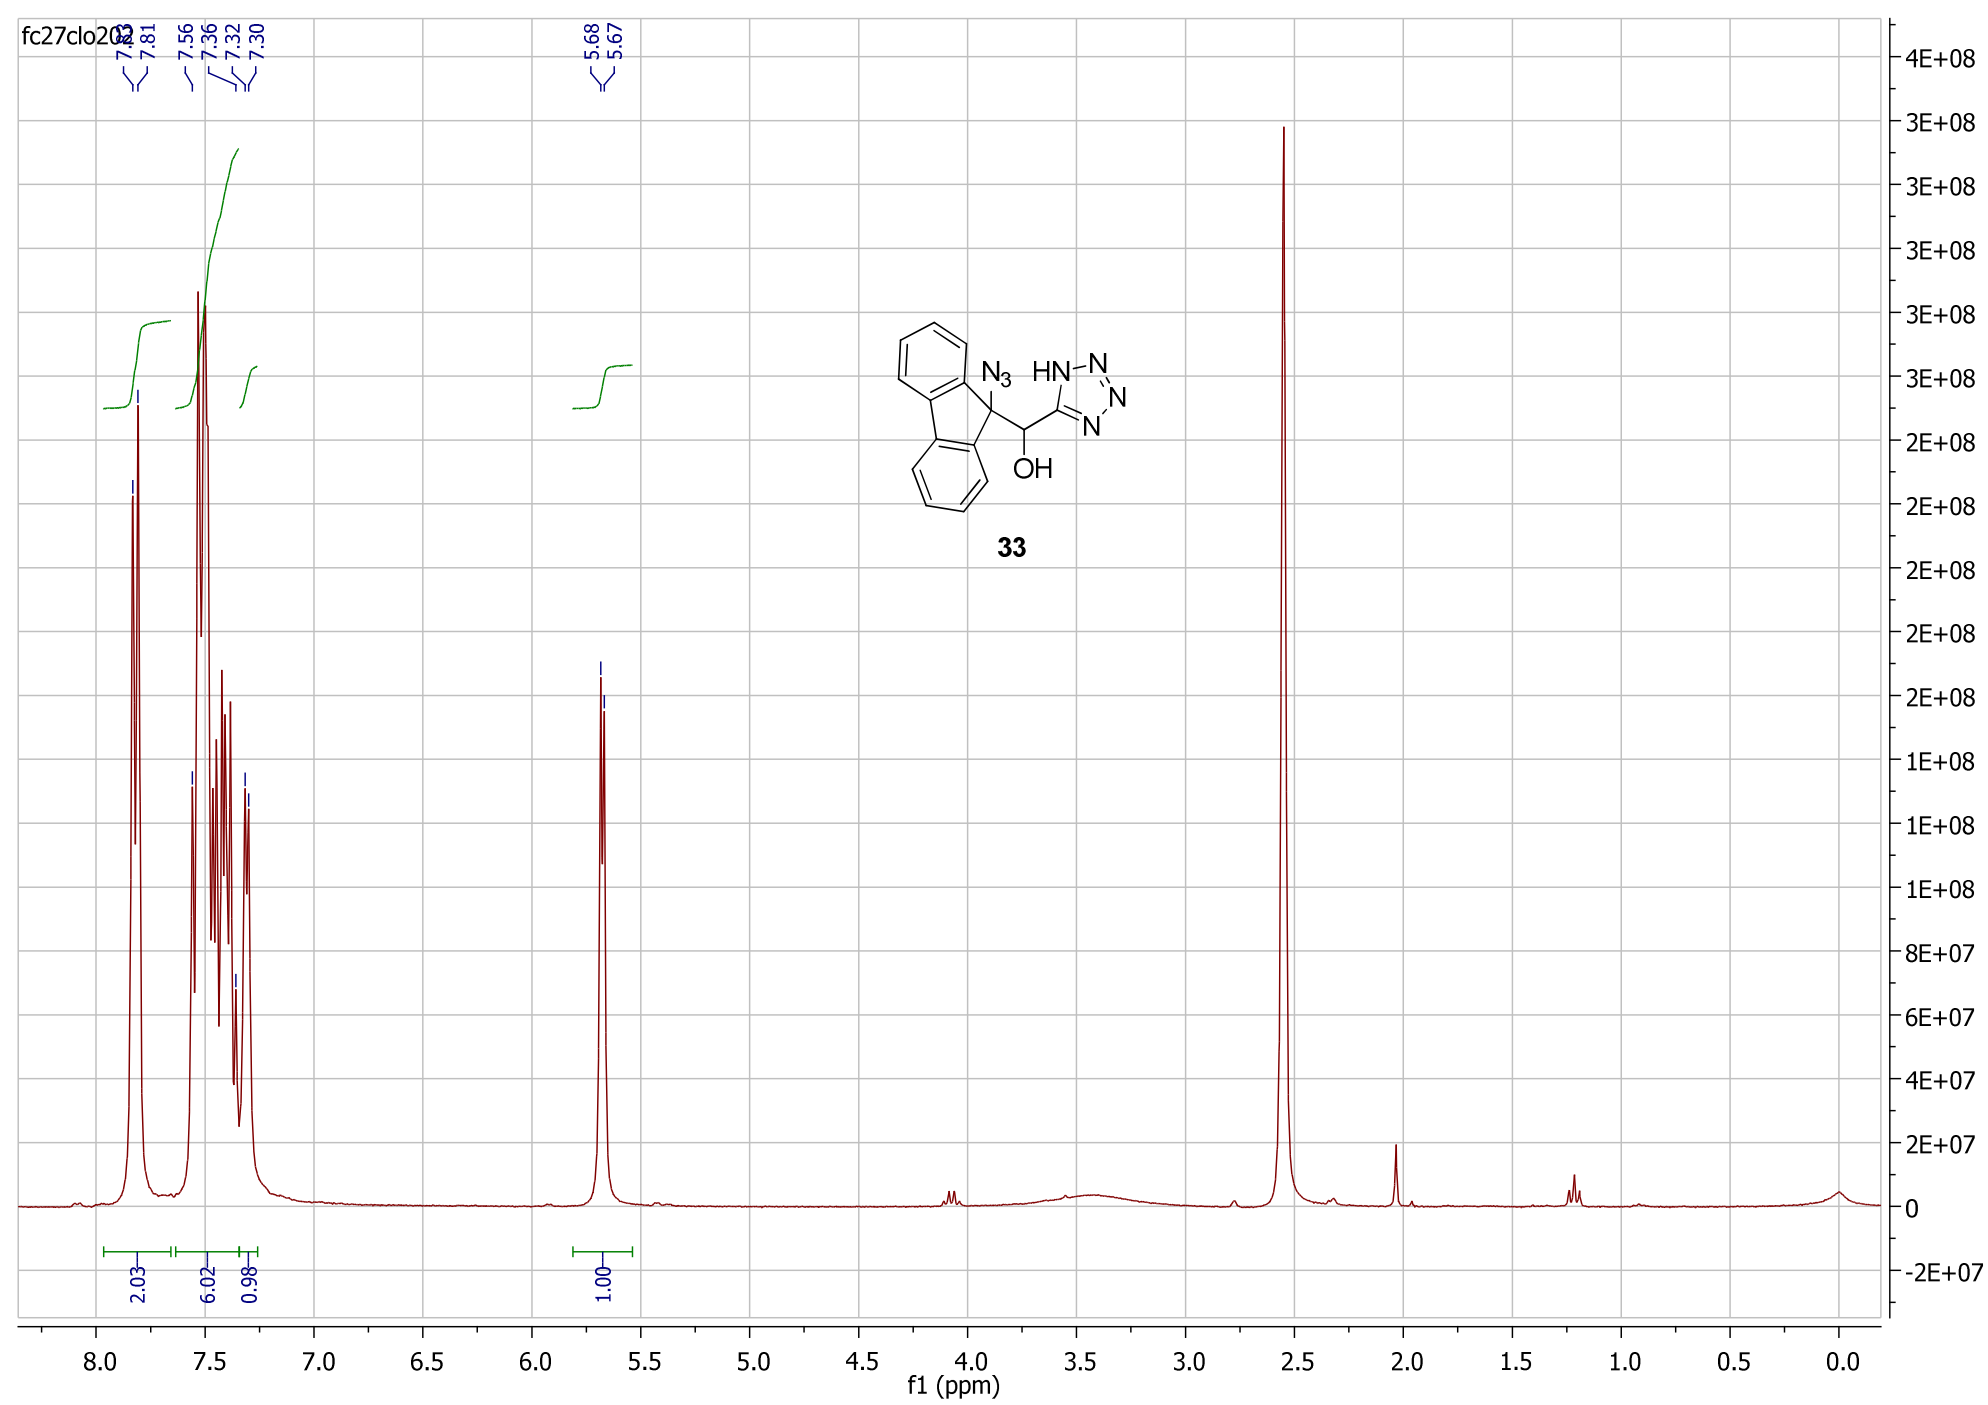

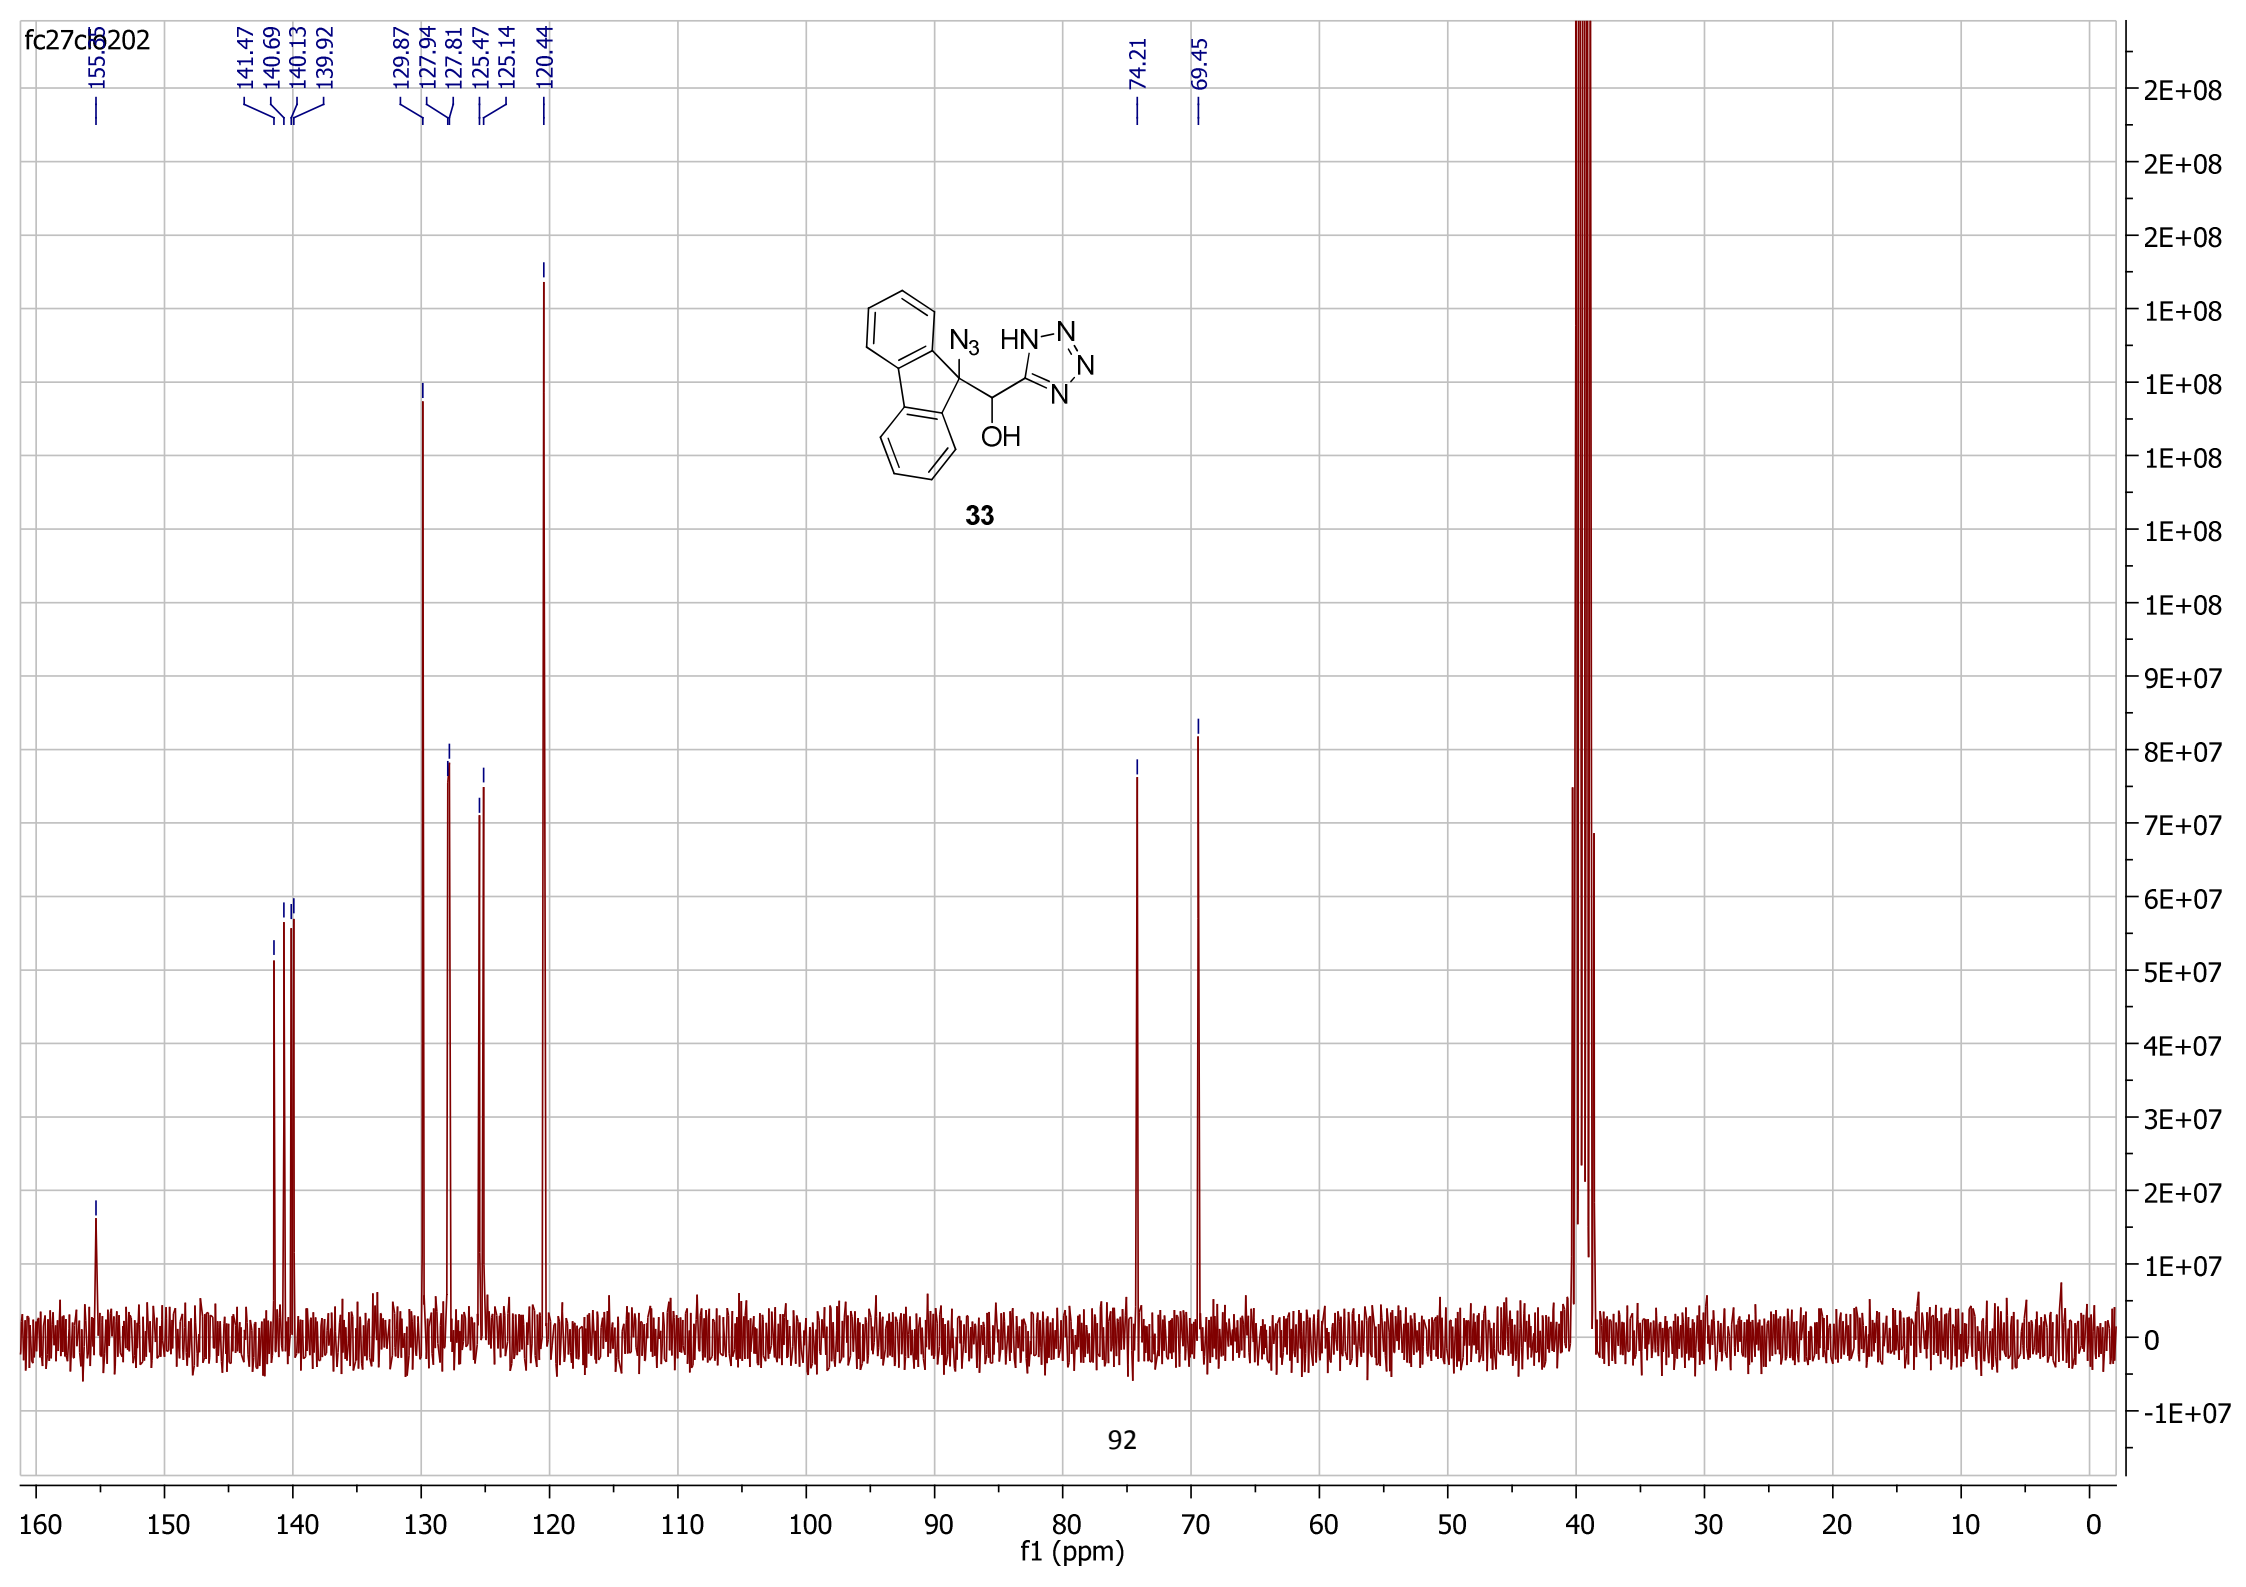

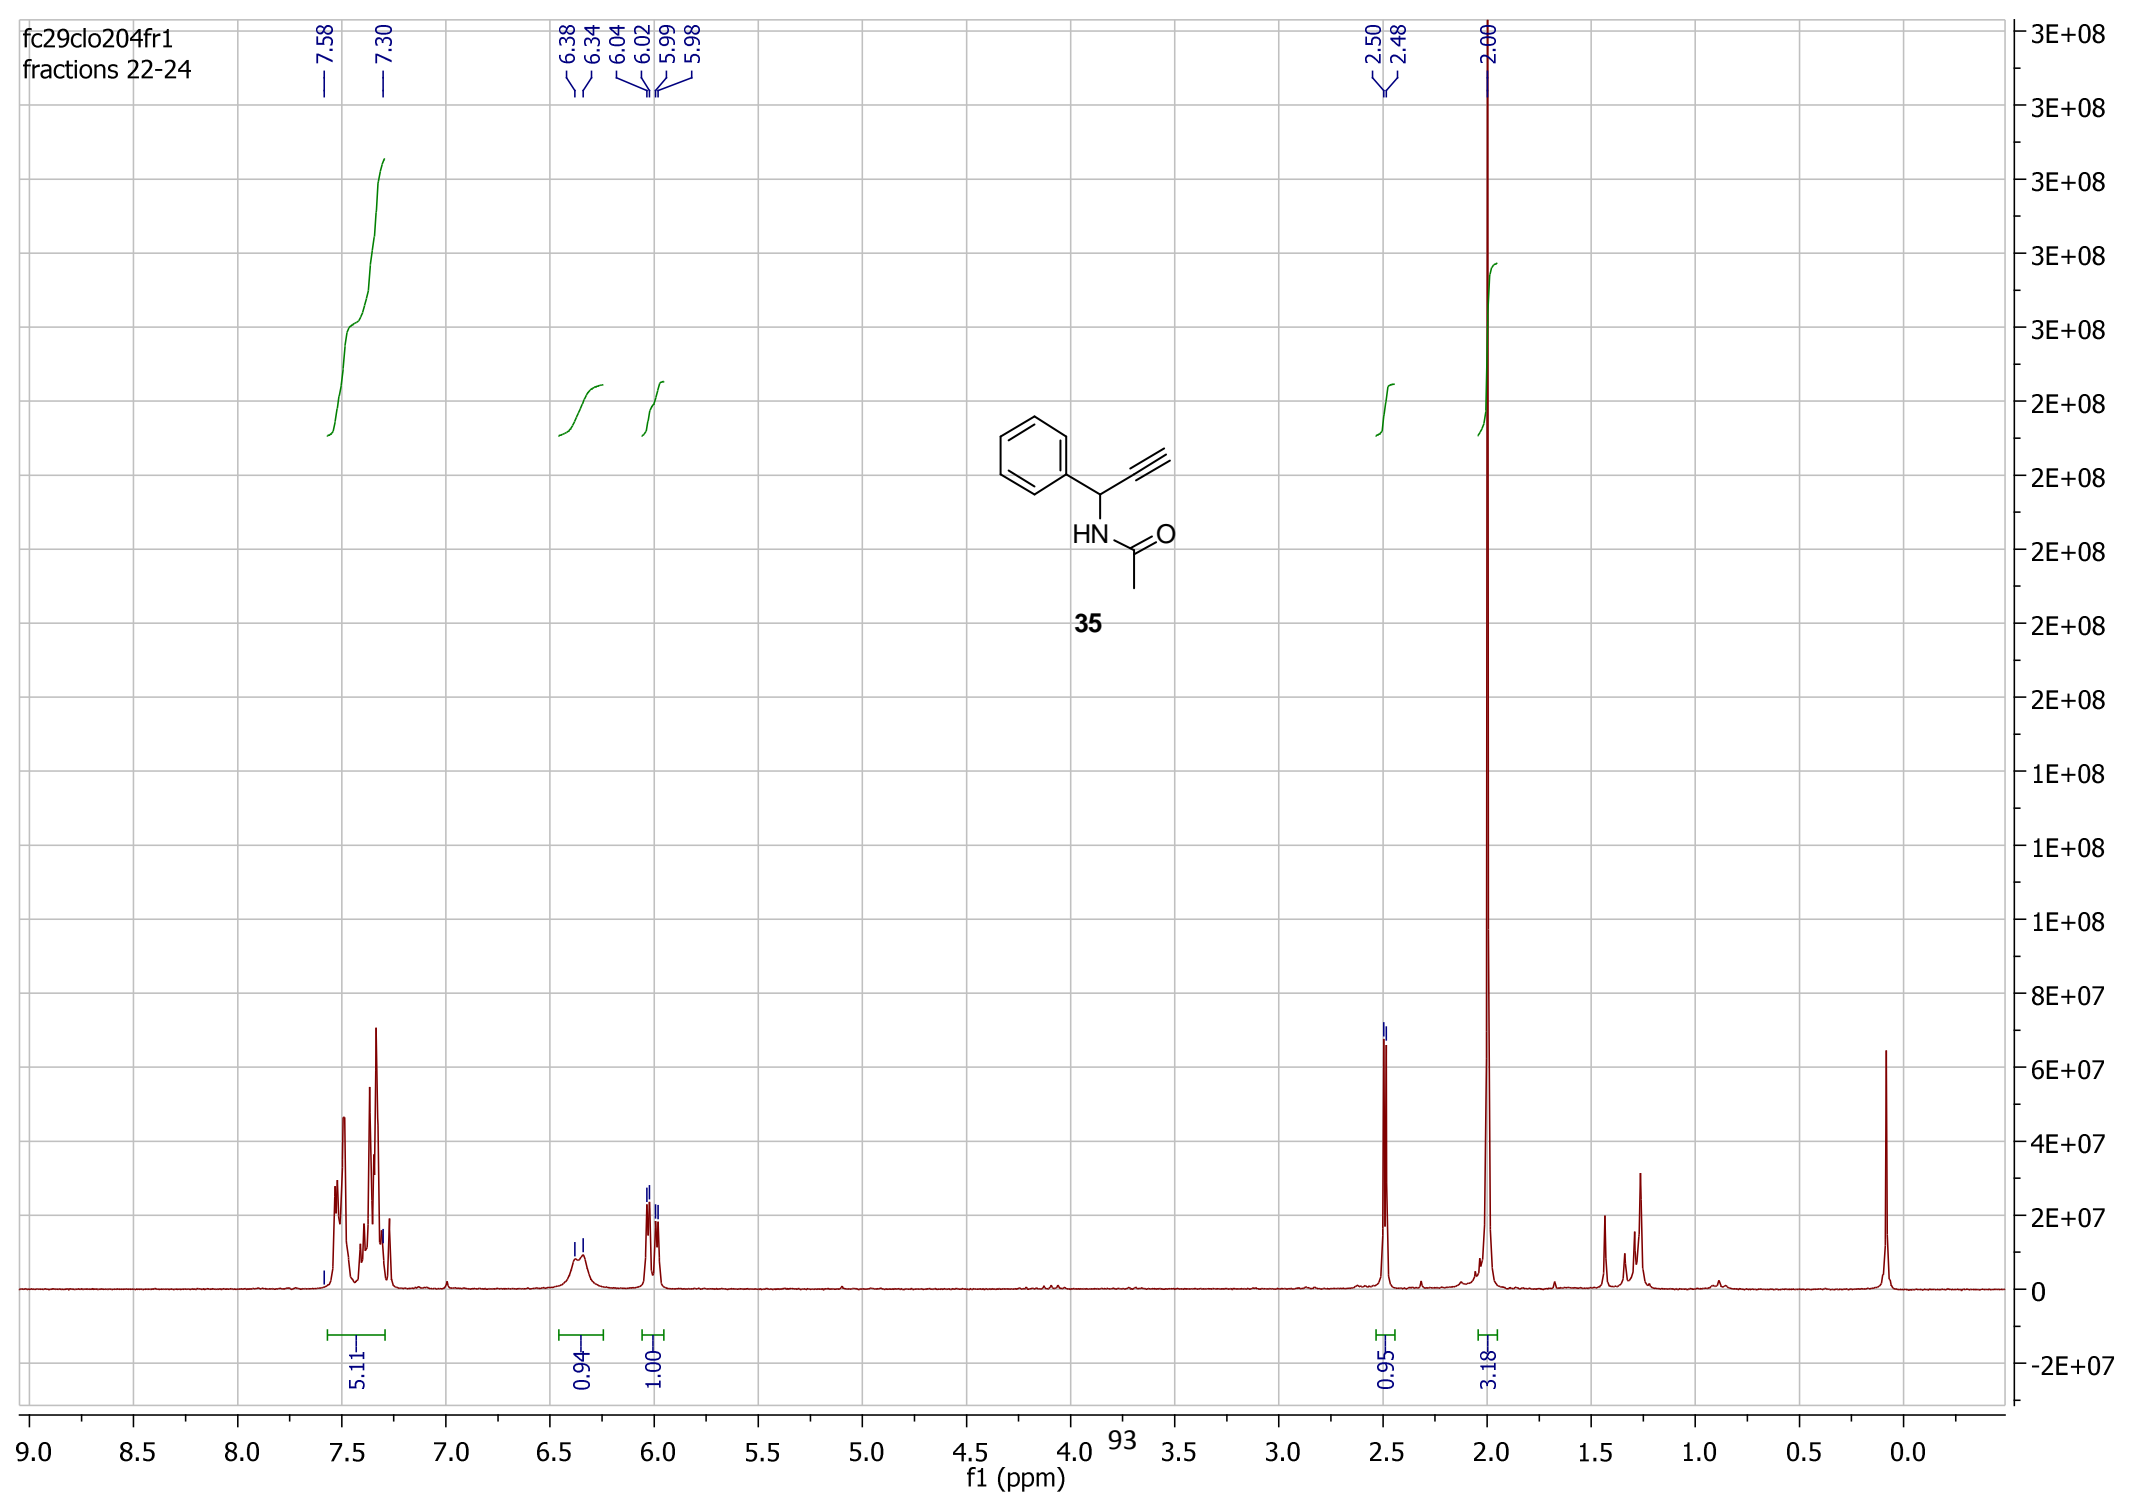

fc29clo240-1

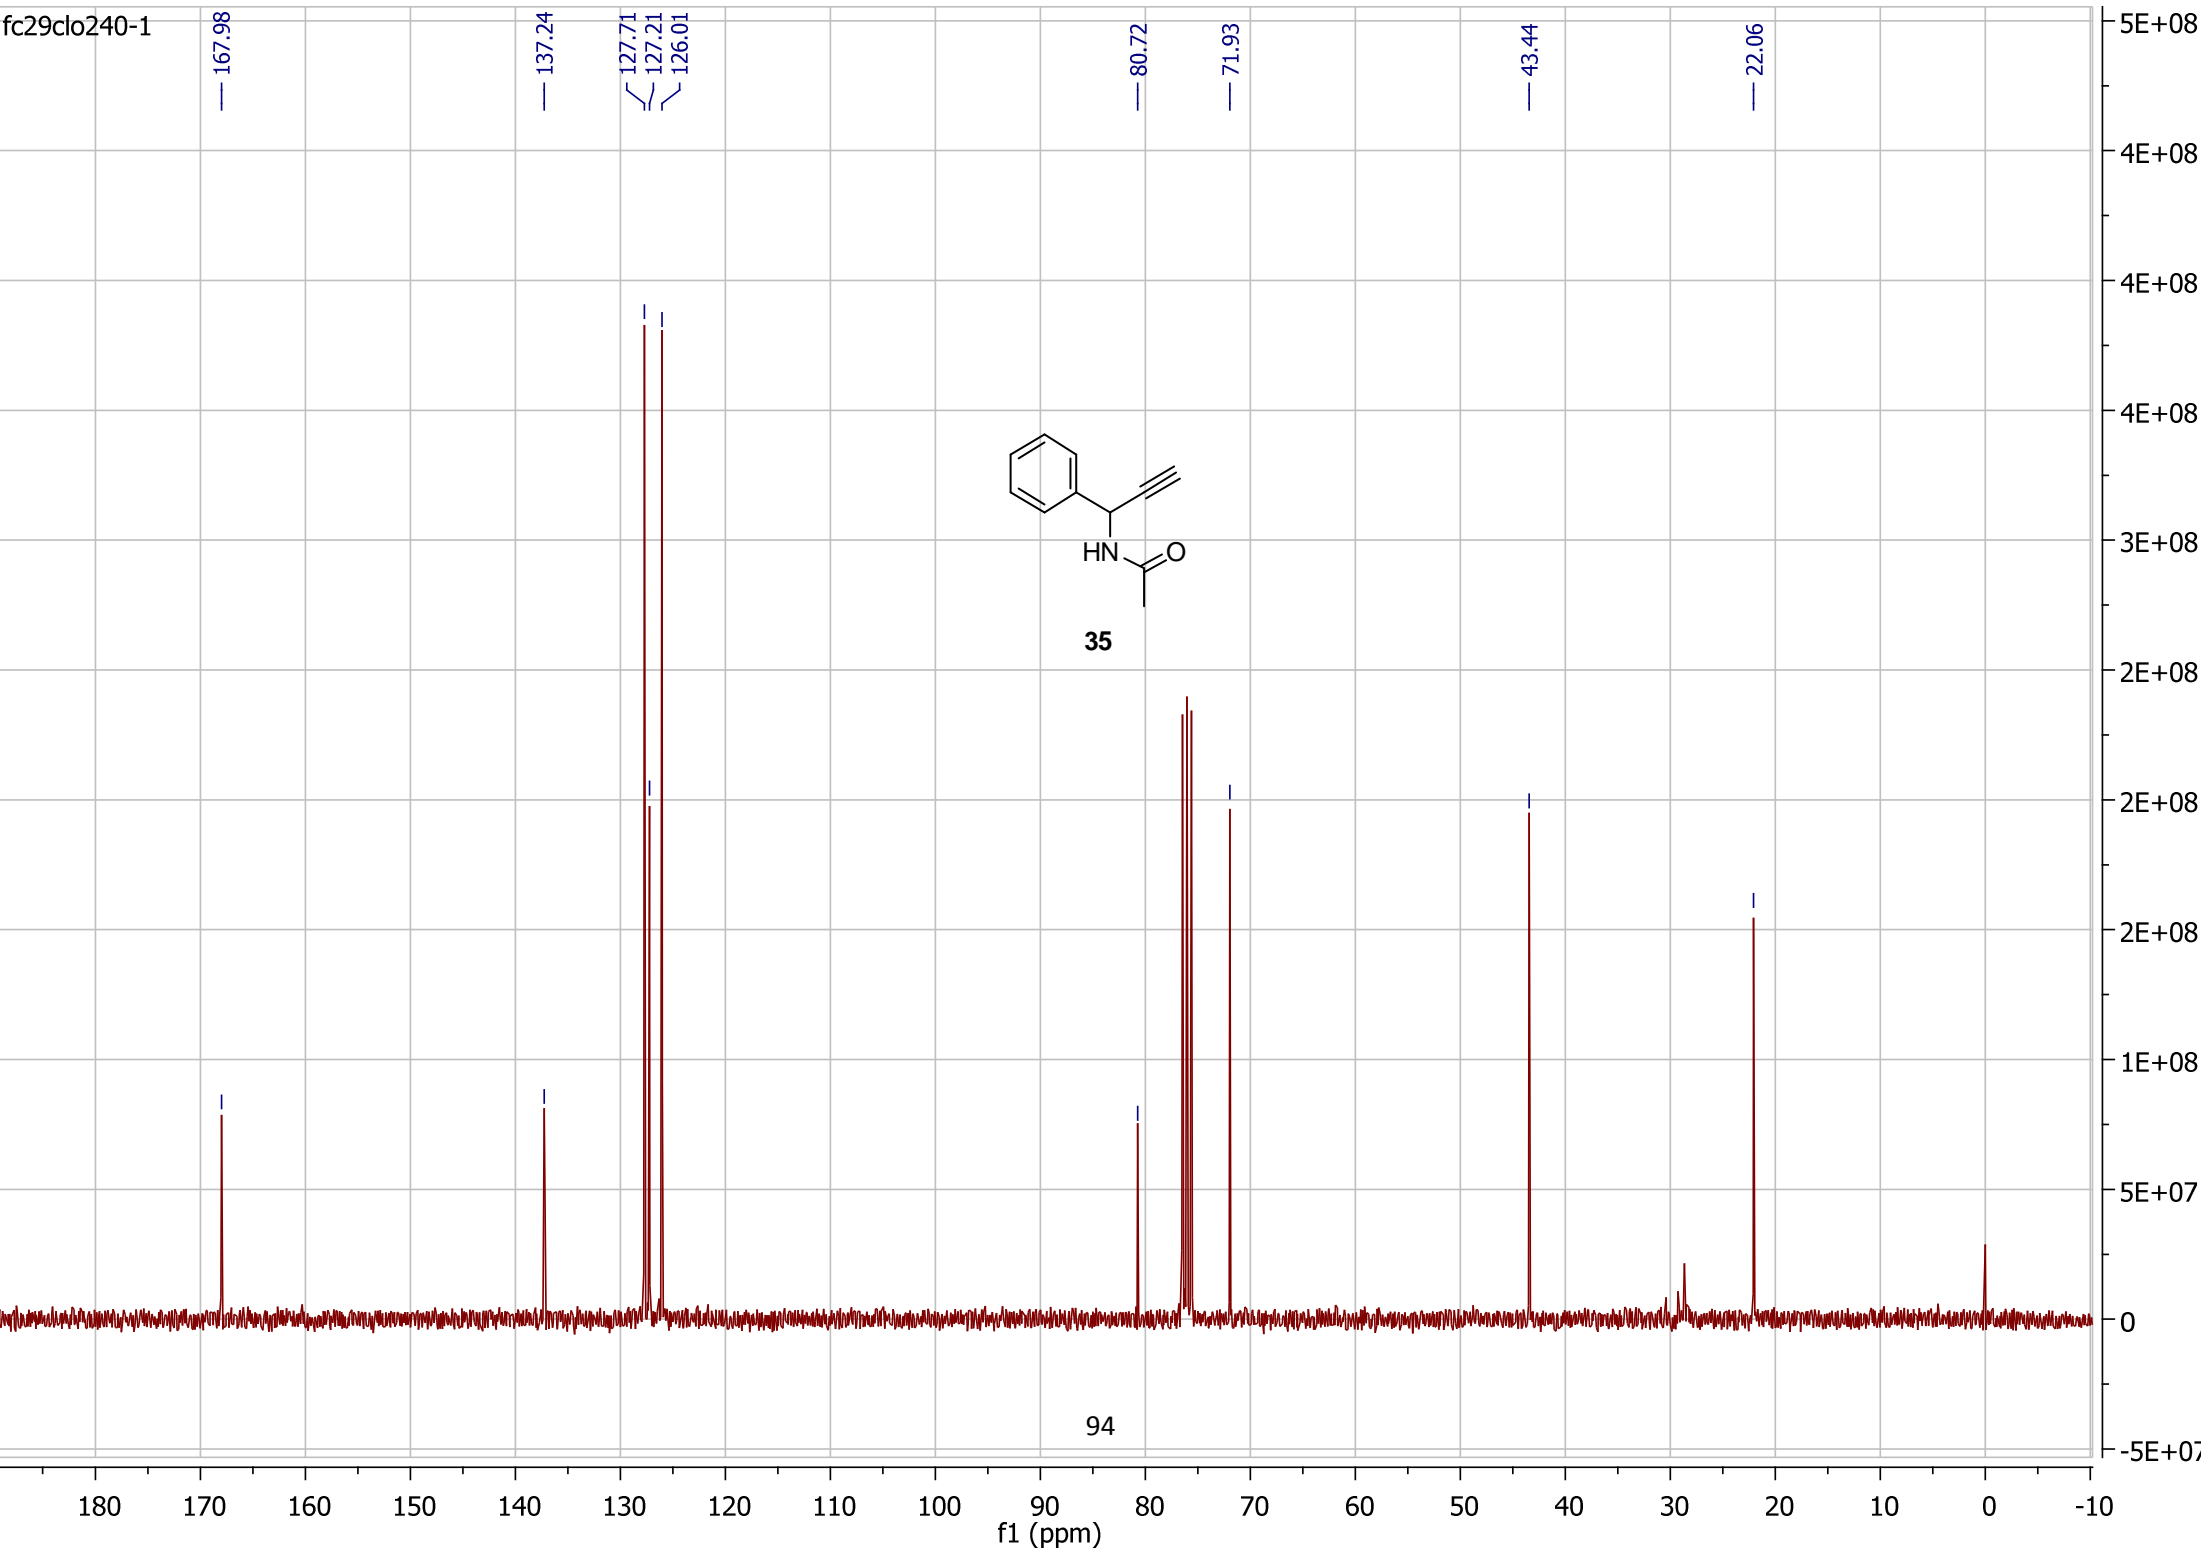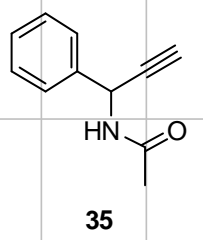

94

167.98

137.24

127.71

127.21

126.01

80.72

71.93

43.44

22.06

180 170 160 150 140 130 120 110 100 90 80 70 60 50 40 30 20 10 0 -10

f1 (ppm)

5E+08  
4E+08  
4E+08  
4E+08  
3E+08  
2E+08  
2E+08  
2E+08  
1E+08  
5E+07  
0  
-5E+07

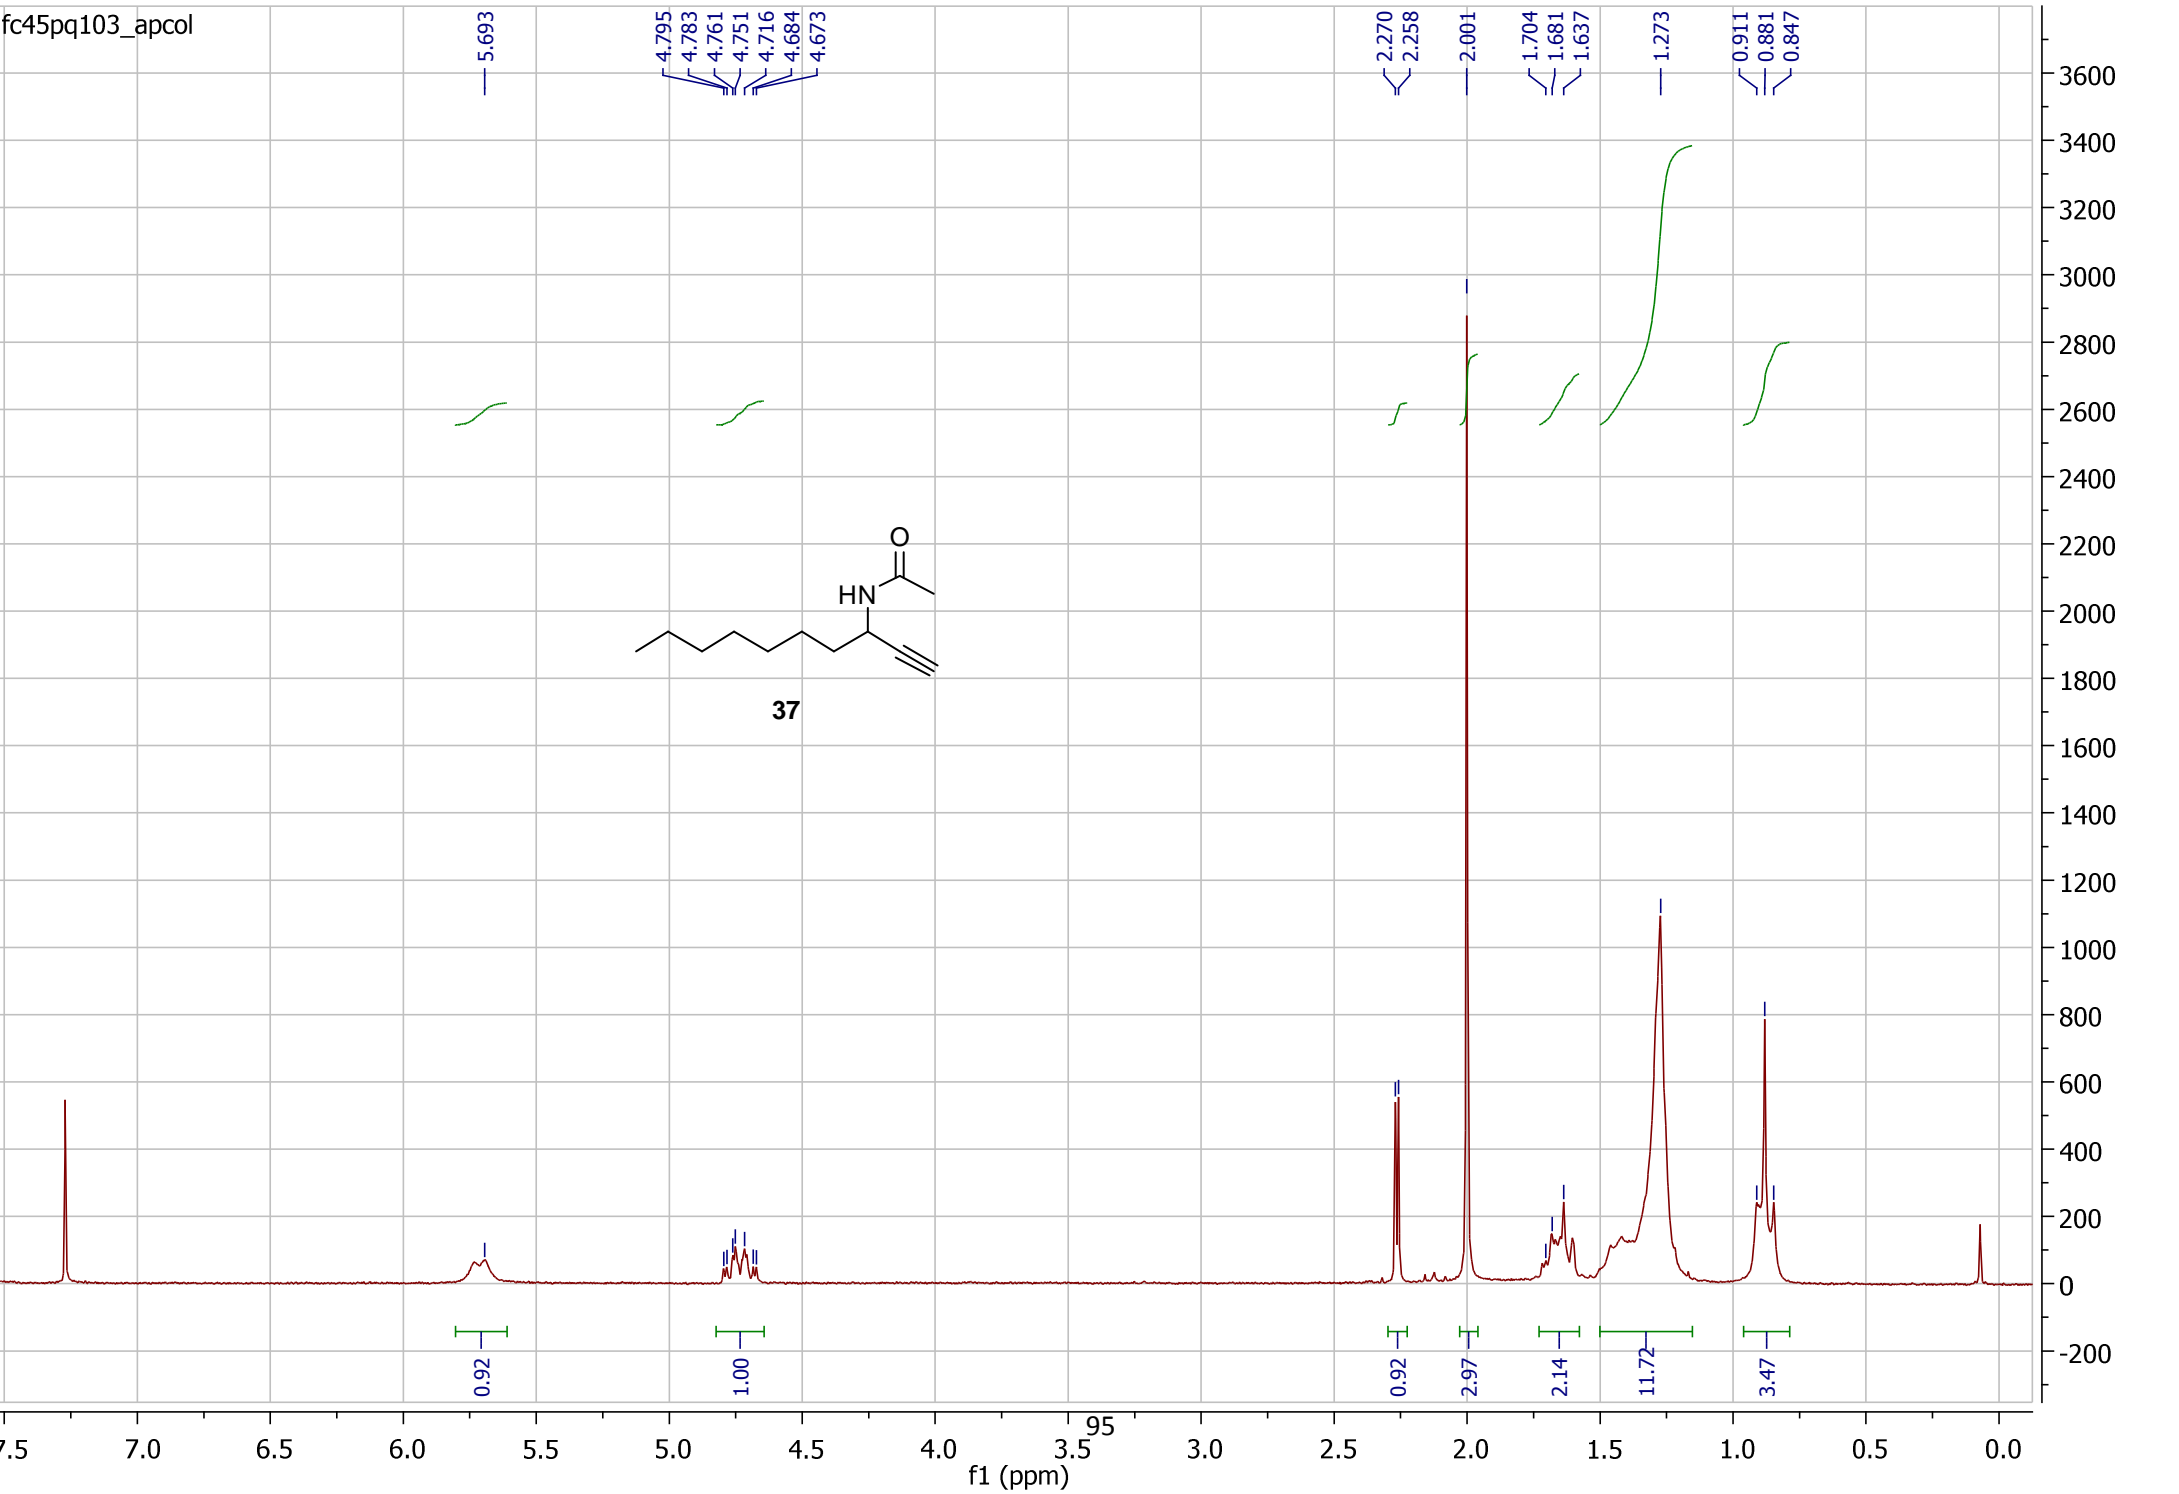

fc458q103-300

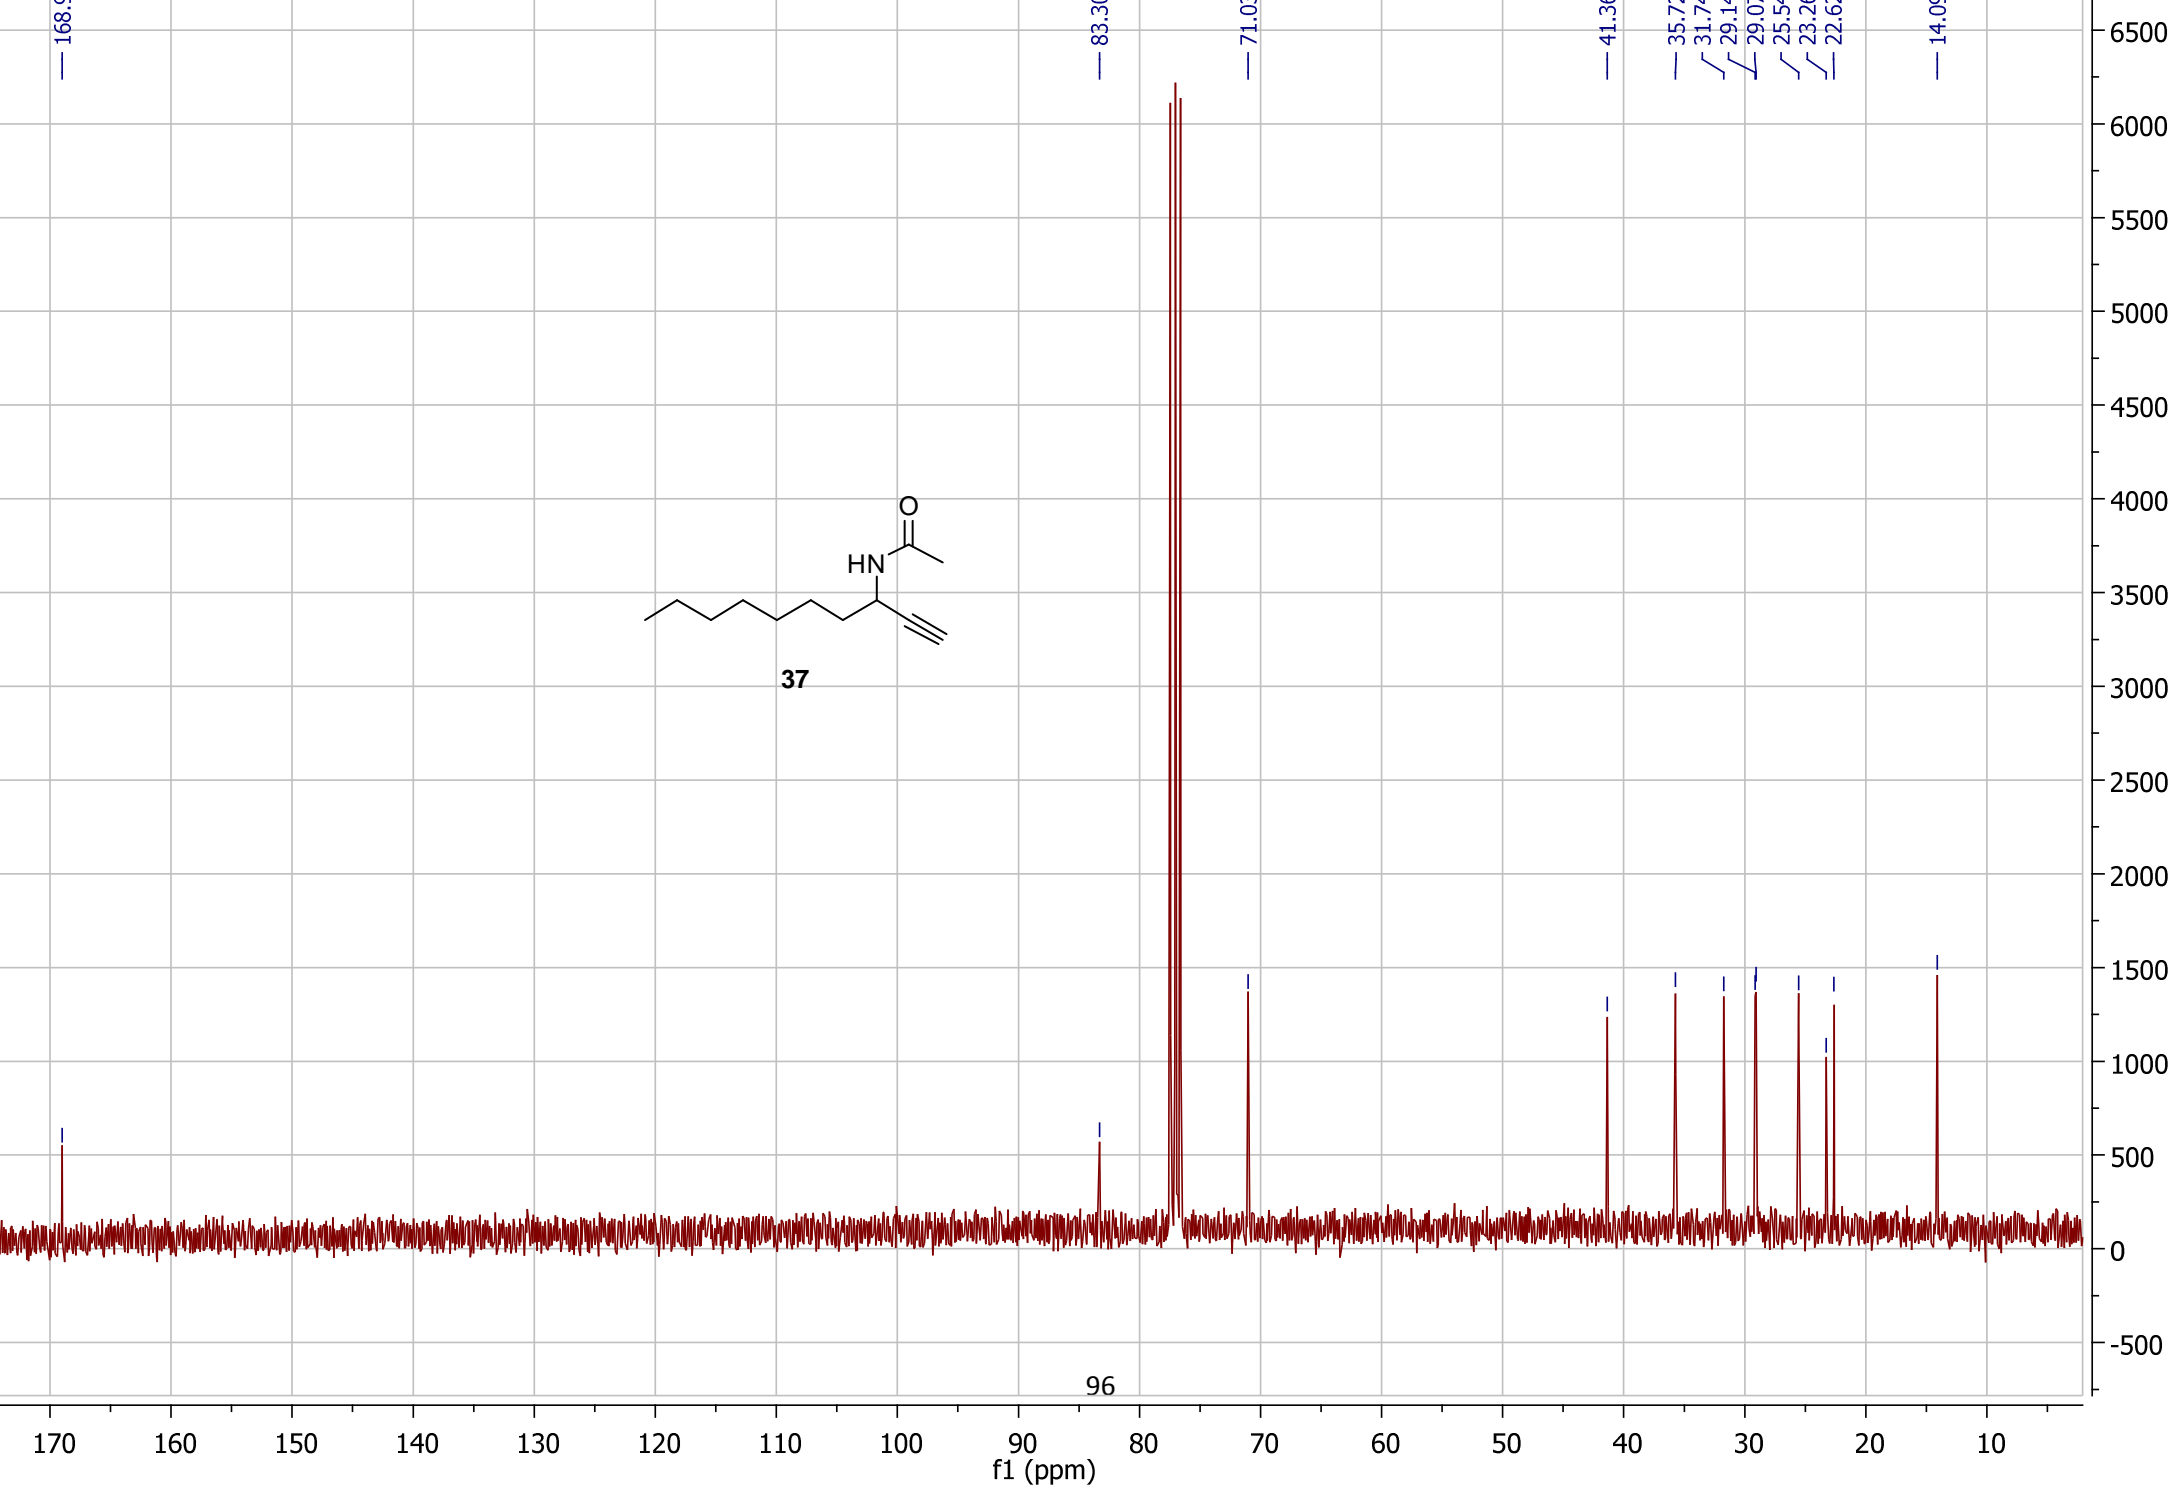

37

96



fc45pq105\_apcol

7.420  
7.409  
7.370  
7.359  
7.329  
7.301  
7.290  
7.279  
7.272  
7.259  
6.894  
6.886  
6.881  
6.808  
6.214  
6.188  
6.135  
6.109  
6.019  
5.979  
5.632  
5.622  
5.612  
5.594  
5.570  
5.554

2.501  
2.490  
2.042

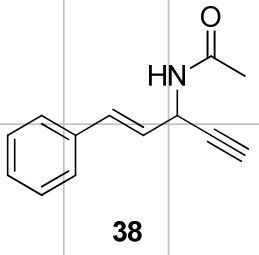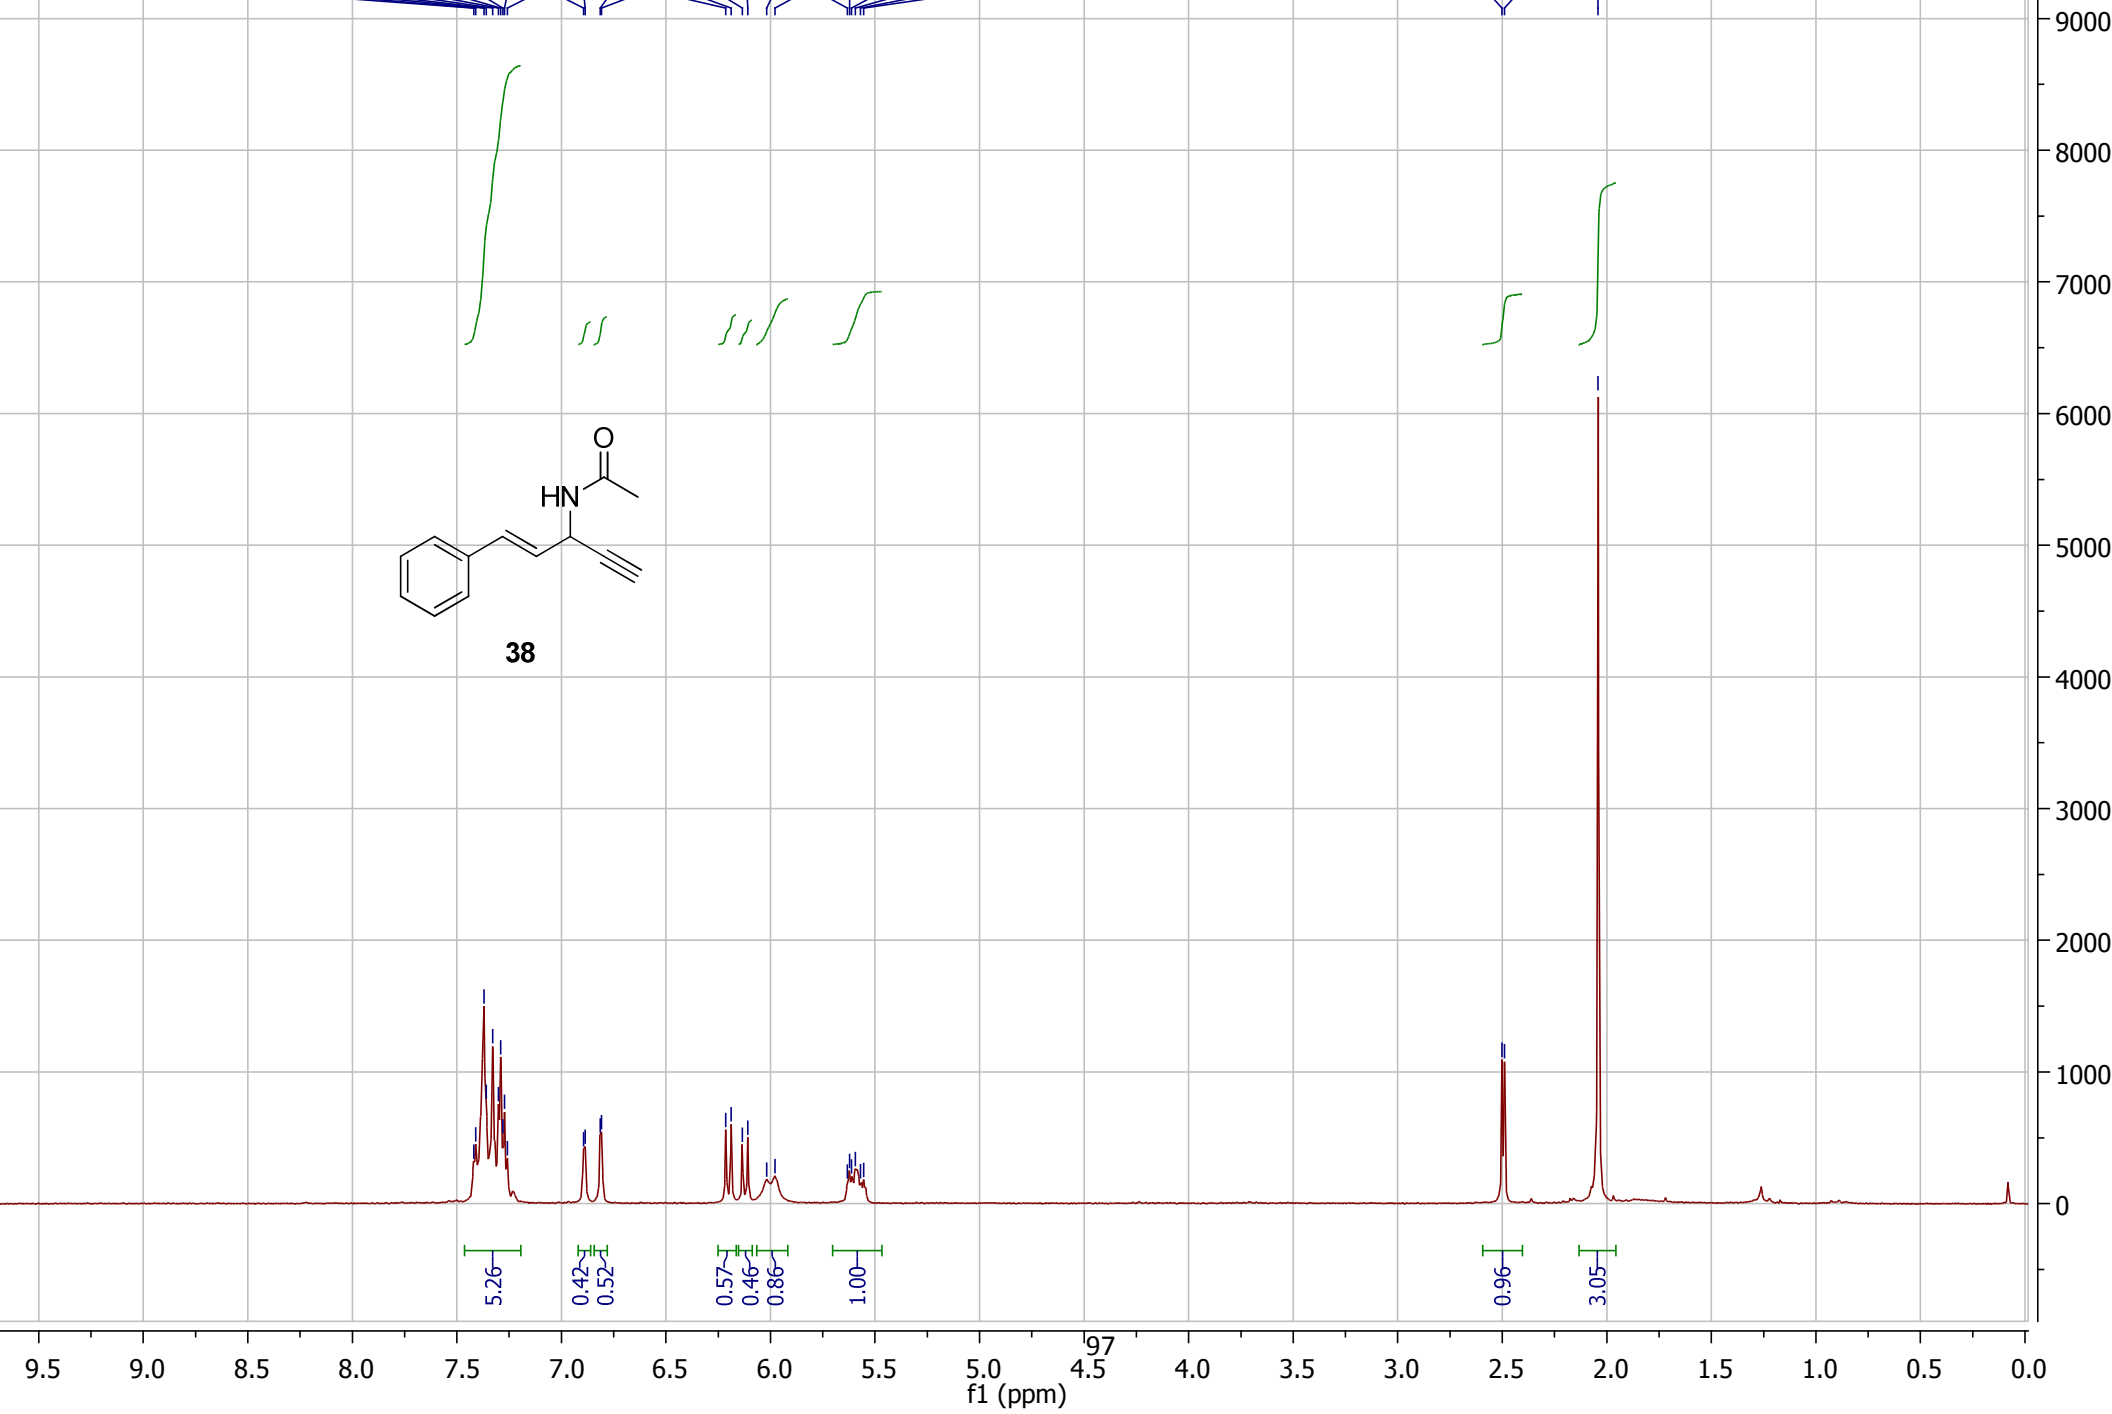

5.26

0.42  
0.52

0.57  
0.46  
0.86

1.00

0.96

3.05

f1 (ppm)

fc45pq105-300

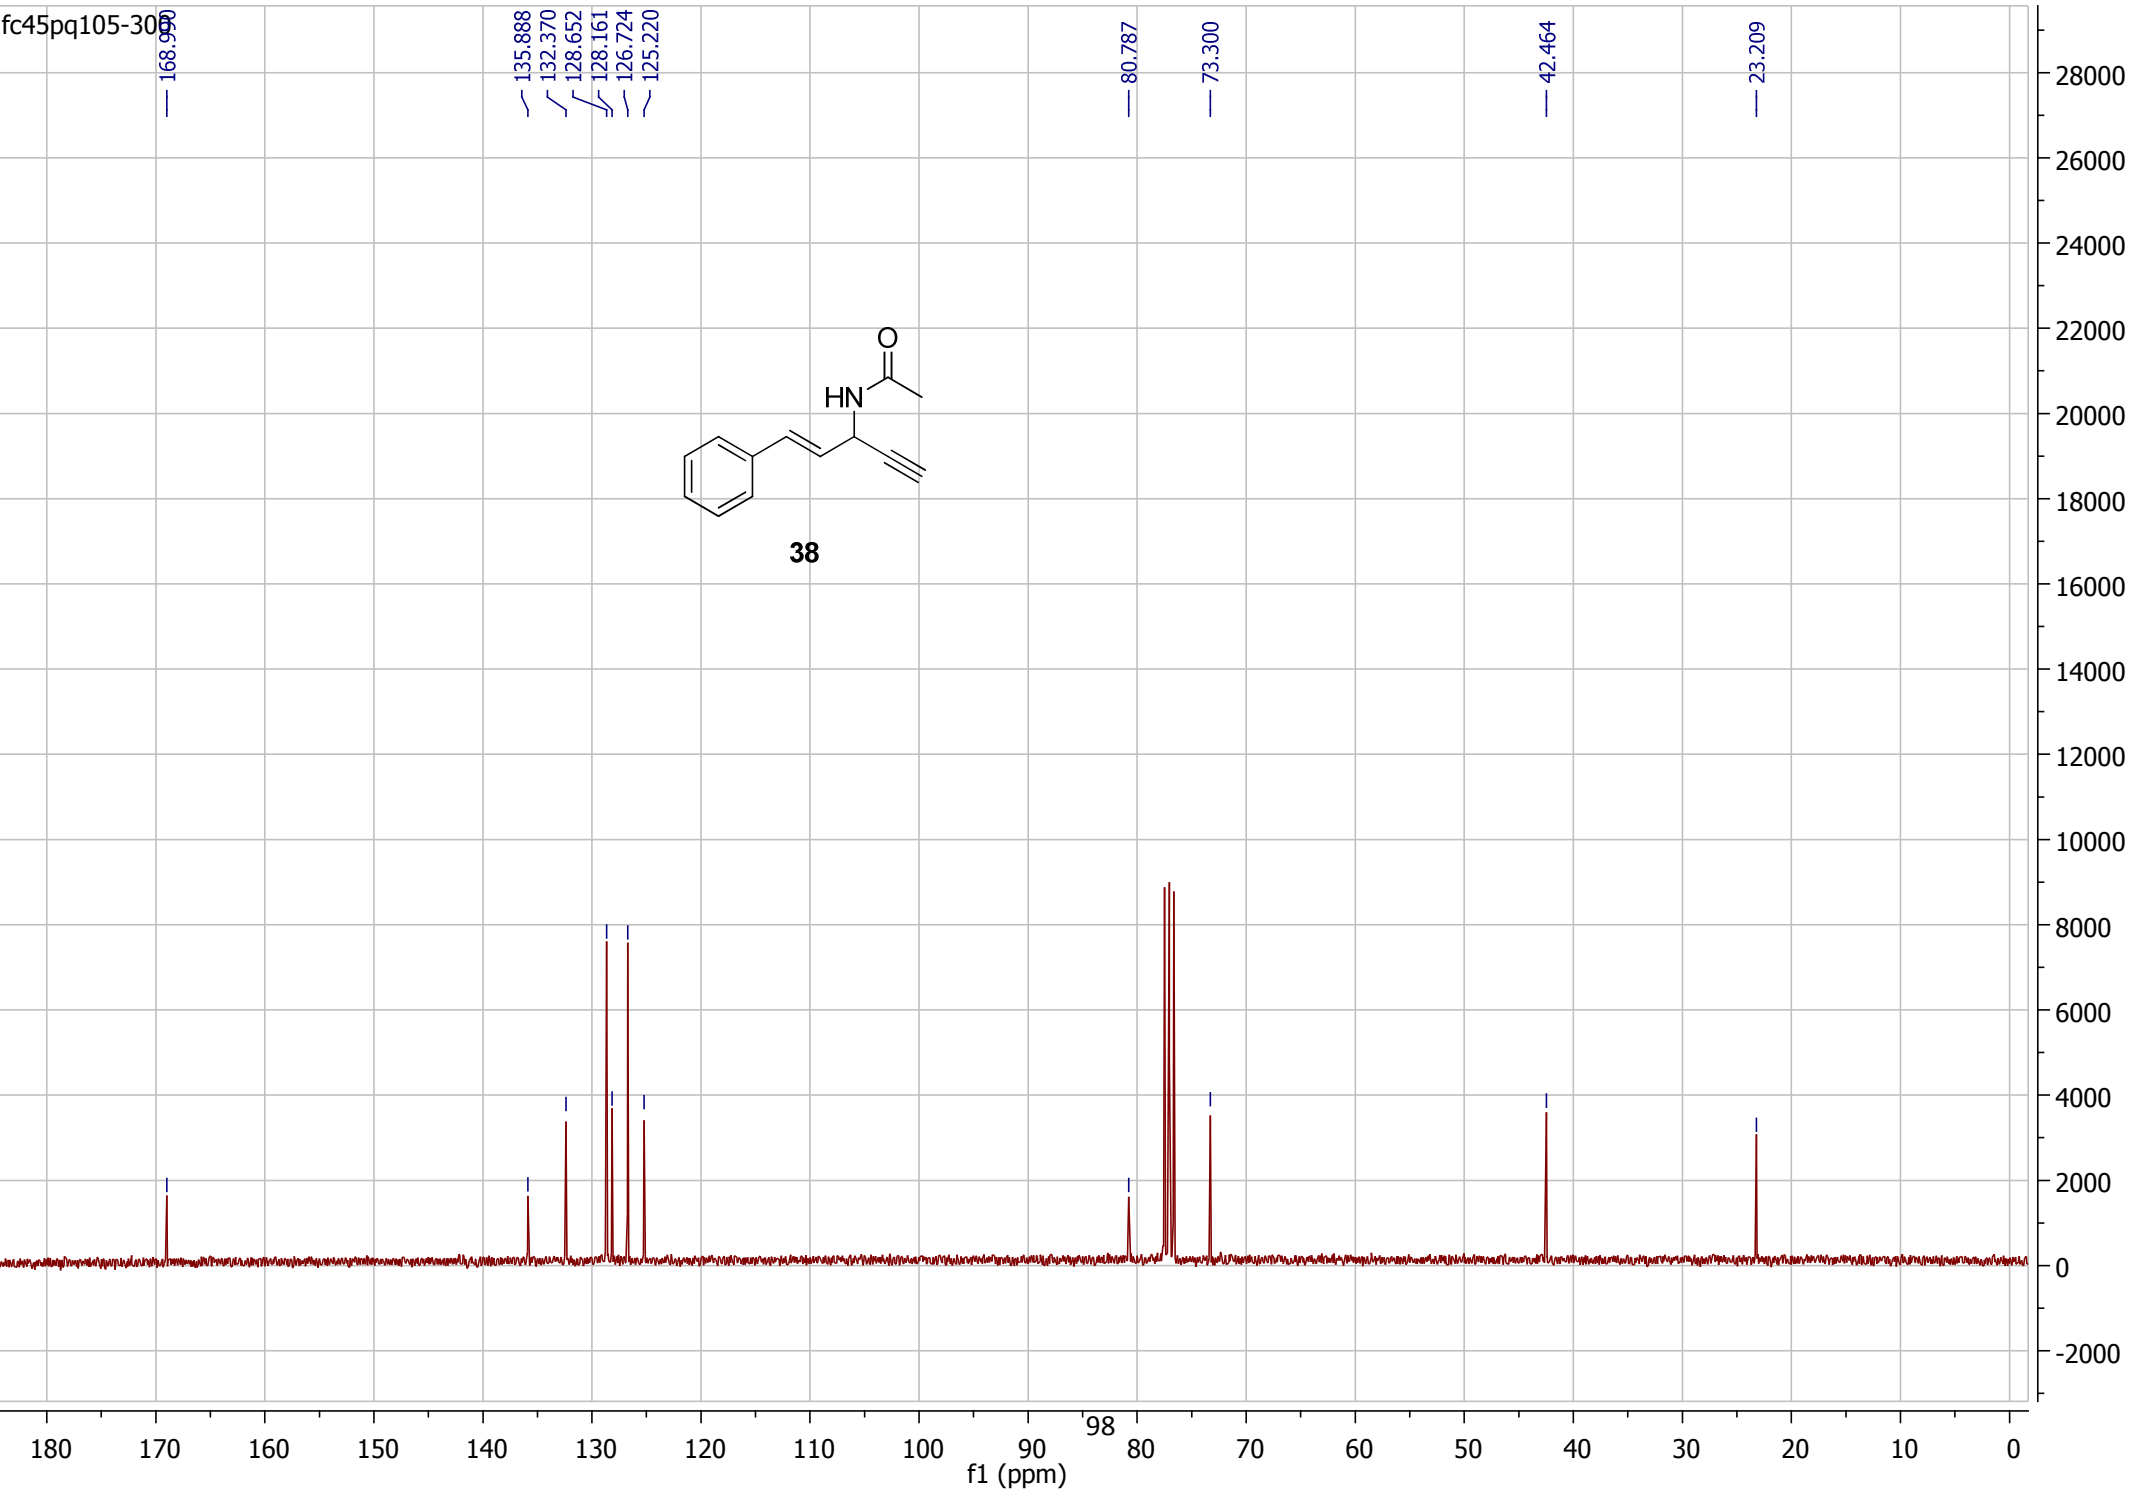

f1 (ppm)

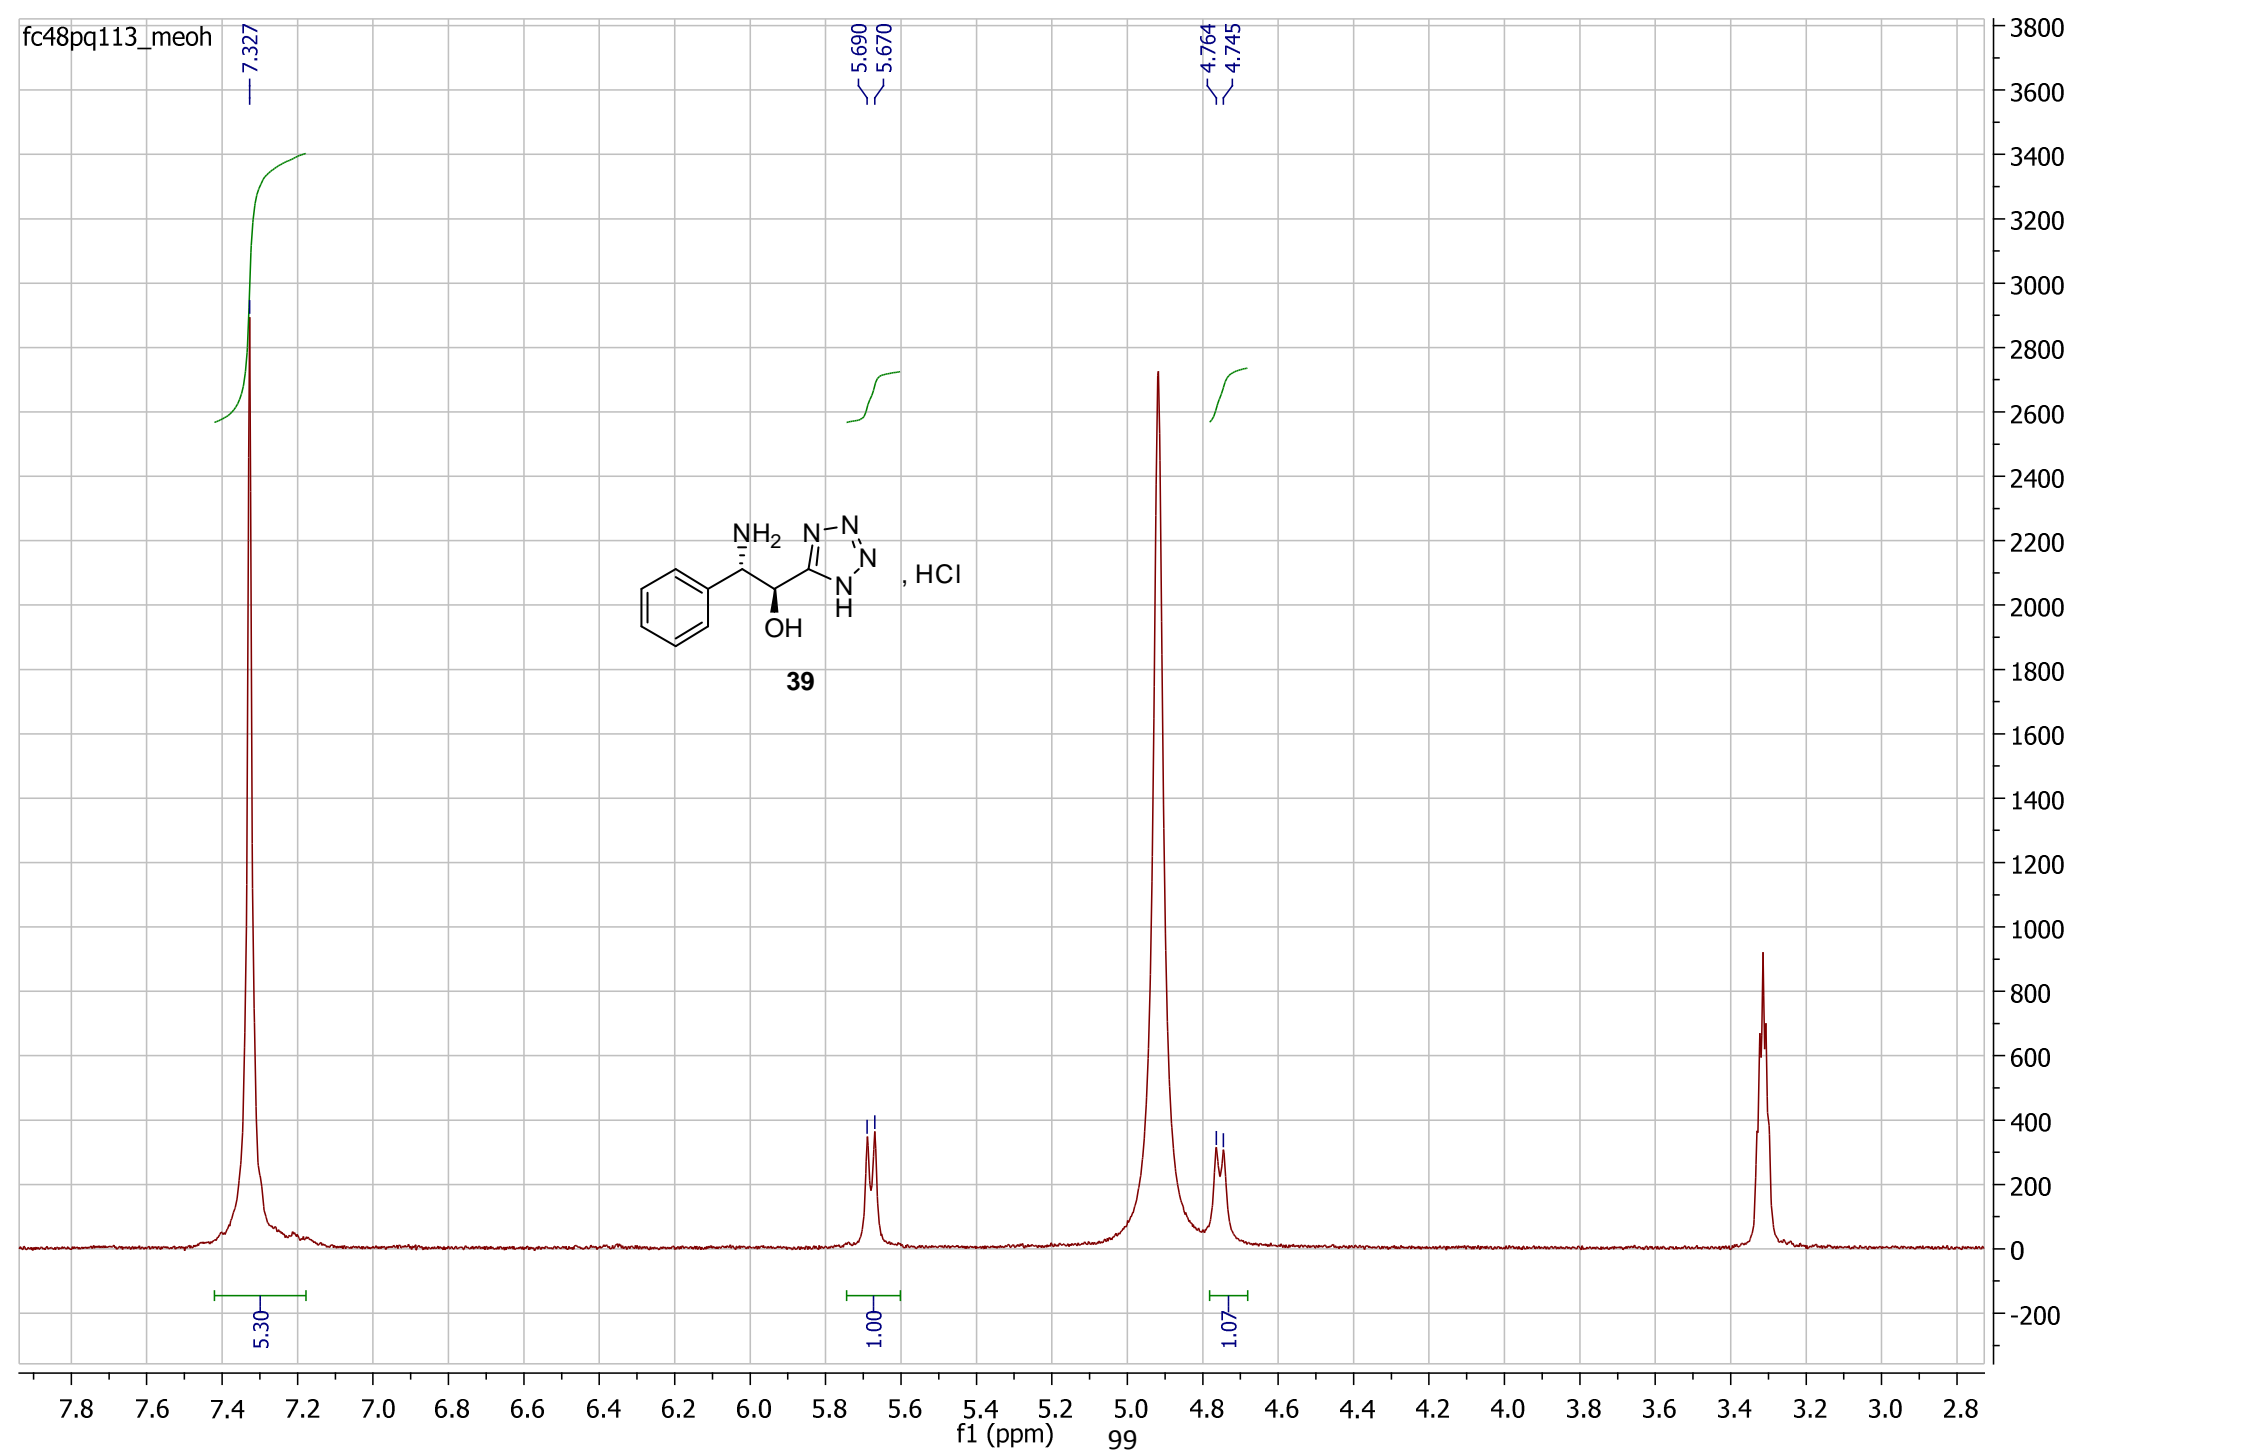

fc48pq113-meoh300

133.279  
131.293  
130.657  
129.829  
129.627

67.128  
59.307

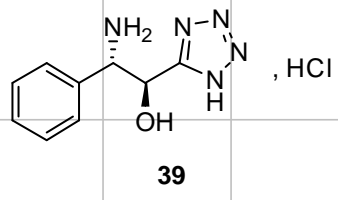

100

150 140 130 120 110 100 90 80 70 60 50 40 30 20 10 0

f1 (ppm)

45000  
40000  
35000  
30000  
25000  
20000  
15000  
10000  
5000  
0

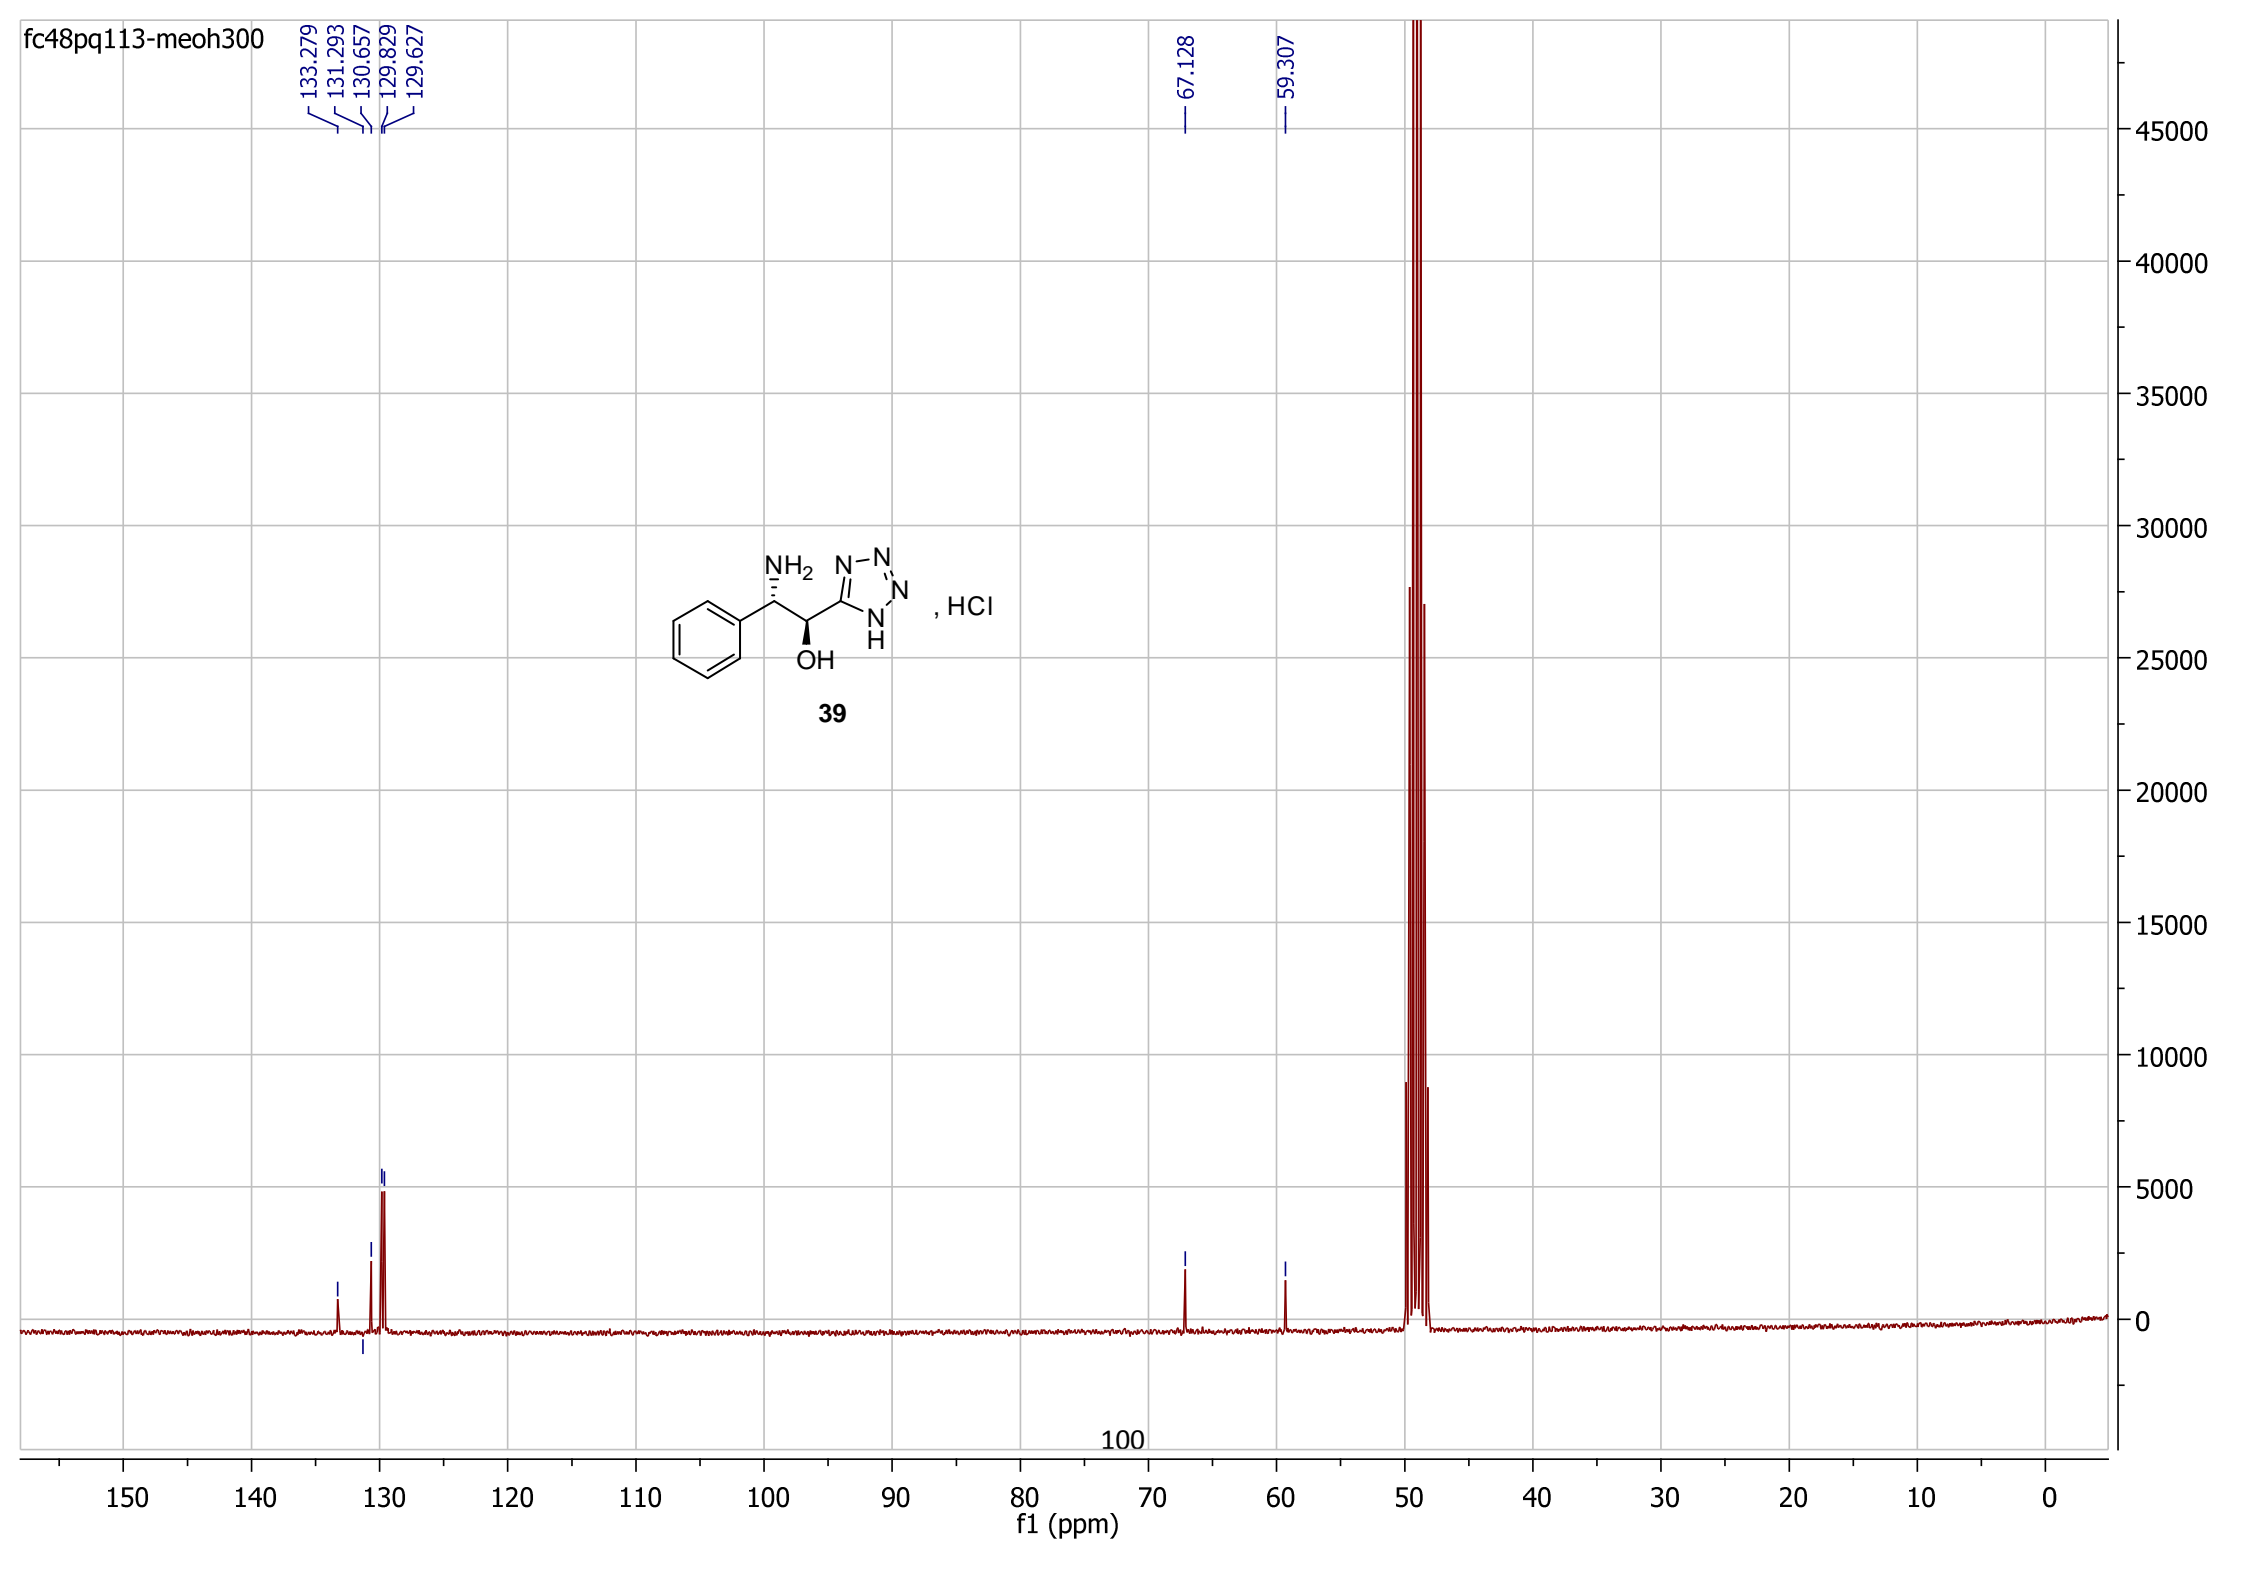

Supplement: c4qo00345d1.pdf [file c4qo00345d1.pdf]
